# Supplementary material for: Dual-specific autophosphorylation of kinase IKK2 enables phosphorylation of substrate IκBα through a phosphoenzyme intermediate
Source: eLife. 2025 Jun 30;13:RP98009. doi: 10.7554/eLife.98009 (PMC12208667; doi:10.7554/eLife.98009)
Supplement: Supplementary file 1. [file elife-98009-supp1.xlsx]

## Sheet: Sheet1
Protein IDs	Majority protein IDs	Peptide counts (all)	Peptide counts (razor+unique)	Peptide counts (unique)	Protein names	Gene names	Fasta headers	Number of proteins	Peptides	Razor + unique peptides	Unique peptides	Peptides Sample 2	Razor + unique peptides Sample 2	Unique peptides Sample 2	Sequence coverage [%]	Unique + razor sequence coverage [%]	Unique sequence coverage [%]	Mol. weight [kDa]	Sequence length	Sequence lengths	Q-value	Score	Sequence coverage Sample 2 [%]	Intensity	Intensity Sample 2	iBAQ	iBAQ Sample 2	MS/MS count	Only identified by site	Reverse	Potential contaminant	id	Peptide IDs	Peptide is razor	Mod. peptide IDs	Evidence IDs	MS/MS IDs	Best MS/MS	Oxidation (M) site IDs	Oxidation (M) site positions
A0A2P1DM92;A0A9R0D4I7;A0A0K0K6V6;A0A9R0E7U5	A0A2P1DM92;A0A9R0D4I7;A0A0K0K6V6;A0A9R0E7U5	9;9;9;8	9;9;9;8	1;1;1;1			tr|A0A2P1DM92|A0A2P1DM92_SPOFR Loquacious-PBa OS=Spodoptera frugiperda OX=7108 PE=2 SV=1;tr|A0A9R0D4I7|A0A9R0D4I7_SPOFR Interferon-inducible double-stranded RNA-dependent protein kinase activator A homolog isoform X3 OS=Spodoptera frugiperda OX=7108 GN=LOC	4	9	9	1	9	9	1	30.7	30.7	4.4	42.38	384	384;385;391;346	0	58.962	30.7	699950000	699950000	41174000	41174000	13				0	1658;3320;3394;3457;4237;5166;5717;5857;5974	True;True;True;True;True;True;True;True;True	1681;3362;3438;3502;4306;5249;5806;5950;6070	2117;4197;4321;4387;5437;6656;6657;7344;7513;7657;7658	3220;3221;3222;6380;6608;6695;8225;10144;10145;10146;11206;11442;11650;11651	3220;6380;6608;6695;8225;10144;11206;11442;11650
A0A0K2CTM2;Q26487;A0A8E5JRV1;J7EIC0;A0A2H1WDC6;J7EIS8;J7EMG6;J7ELF8	A0A0K2CTM2;Q26487;A0A8E5JRV1;J7EIC0;A0A2H1WDC6	13;12;12;10;7;5;3;3	13;12;12;10;7;5;3;3	13;12;12;10;7;5;3;3			tr|A0A0K2CTM2|A0A0K2CTM2_SPOFR Elongation factor 1-alpha OS=Spodoptera frugiperda OX=7108 GN=LOC118272072 PE=2 SV=1;sp|Q26487|EF1A_SPOFR Elongation factor 1-alpha (Fragment) OS=Spodoptera frugiperda OX=7108 PE=1 SV=1;tr|A0A8E5JRV1|A0A8E5JRV1_SPOFR Elongati	8	13	13	13	13	13	13	46	46	46	50.377	463	463;413;413;373;462;181;157;158	0	134.01	46	2623200000	2623200000	114050000	114050000	30				1	662;1390;1675;2339;2363;3396;3676;4304;4373;4603;4875;5372;6037	True;True;True;True;True;True;True;True;True;True;True;True;True	670;1411;1698;2370;2394;3440;3726;4373;4444;4678;4955;5456;6133	829;830;1801;2136;2966;2991;4323;4698;5554;5648;5965;6304;6929;6930;7762;7763	1232;1233;1234;1235;2765;2766;3252;4561;4562;4599;4600;4601;6612;7176;8419;8420;8547;9099;9100;9101;9102;9103;9104;9617;10600;10601;10602;11832;11833;11834	1233;2765;3252;4561;4599;6612;7176;8420;8547;9100;9617;10602;11833
A0A0K2CTV2;A0A8E5NHF8;B0LUE1	A0A0K2CTV2;A0A8E5NHF8	19;12;6	19;12;6	2;0;0			tr|A0A0K2CTV2|A0A0K2CTV2_SPOFR Glyceraldehyde-3-phosphate dehydrogenase OS=Spodoptera frugiperda OX=7108 GN=LOC118271716 PE=2 SV=1;tr|A0A8E5NHF8|A0A8E5NHF8_SPOFR Glyceraldhyde-3-phosphate dehydrogenase (Fragment) OS=Spodoptera frugiperda OX=7108 GN=GAPDH P	3	19	19	2	19	19	2	66.6	66.6	5.4	35.601	332	332;225;125	0	312.69	66.6	6346700000	6346700000	352590000	352590000	81				2	169;994;1523;1694;1695;1982;2266;2341;2852;3100;3197;3541;4137;5462;5464;5475;5482;5495;5649	True;True;True;True;True;True;True;True;True;True;True;True;True;True;True;True;True;True;True	173;1011;1544;1718;1719;2008;2295;2372;2889;3139;3239;3589;4204;5549;5551;5562;5569;5582;5737	221;222;223;224;225;226;227;1265;1959;1960;2160;2161;2162;2505;2872;2968;3614;3913;4034;4035;4036;4492;5304;7035;7036;7037;7038;7039;7041;7053;7060;7061;7077;7256;7257;7258;7259	320;321;322;323;324;325;326;327;328;329;330;331;332;333;334;1894;1895;1896;1897;1898;1899;1900;1901;1902;1903;1904;1905;1906;3010;3011;3281;3282;3283;3284;3285;3802;4430;4564;4565;4566;5540;5541;5542;5982;6142;6143;6144;6145;6846;8040;10737;10738;10739;10740;10741;10742;10743;10744;10745;10746;10747;10748;10749;10750;10751;10752;10753;10754;10756;10775;10776;10777;10791;10792;10814;11057;11058;11…	320;1896;3011;3281;3285;3802;4430;4565;5540;5982;6142;6846;8040;10738;10756;10776;10791;10814;11057
Q962R8;A0A0K2CU27;A0A9R0ES21;A0A2H1WZT8	Q962R8;A0A0K2CU27;A0A9R0ES21;A0A2H1WZT8	4;4;4;4	4;4;4;4	4;4;4;4			tr|Q962R8|Q962R8_SPOFR Small ribosomal subunit protein uS17 OS=Spodoptera frugiperda OX=7108 PE=2 SV=1;tr|A0A0K2CU27|A0A0K2CU27_SPOFR Small ribosomal subunit protein uS17 OS=Spodoptera frugiperda OX=7108 GN=LOC118279295 PE=2 SV=1;tr|A0A9R0ES21|A0A9R0ES21_S	4	4	4	4	4	4	4	37.6	37.6	37.6	14.558	125	125;152;156;195	0	2.9868	37.6	74903000	74903000	10700000	10700000	3				3	674;956;2470;4007	True;True;True;True	683;969;2503;4069	848;1185;3120;5148	1264;1764;4783;7820	1264;1764;4783;7820
A0A0K2CU30	A0A0K2CU30	13	13	13			tr|A0A0K2CU30|A0A0K2CU30_SPOFR Actin-related protein 3 OS=Spodoptera frugiperda OX=7108 GN=LOC118266172 PE=2 SV=1	1	13	13	13	13	13	13	47.4	47.4	47.4	46.96	418	418	0	77.944	47.4	283770000	283770000	12899000	12899000	15				4	1274;1538;1716;1879;2112;2174;2606;3088;3523;4026;4120;5005;5993	True;True;True;True;True;True;True;True;True;True;True;True;True	1295;1559;1740;1904;2139;2201;2641;3127;3571;4088;4187;5087;6089	1653;1976;2189;2373;2665;2746;3290;3291;3898;4472;5169;5279;6476;7710	2523;3030;3322;3607;4037;4201;5040;5041;5950;5951;6820;7850;8012;9886;9887;11757	2523;3030;3322;3607;4037;4201;5040;5950;6820;7850;8012;9887;11757
A0A2H1X3P2;B3TEH3;A0A0K2CU86;A0A9R0D522	A0A2H1X3P2;B3TEH3;A0A0K2CU86;A0A9R0D522	3;3;3;3	3;3;3;3	3;3;3;3			tr|A0A2H1X3P2|A0A2H1X3P2_SPOFR Enolase OS=Spodoptera frugiperda OX=7108 GN=SFRICE_032631 PE=3 SV=1;tr|B3TEH3|B3TEH3_SPOFR Enolase (Fragment) OS=Spodoptera frugiperda OX=7108 PE=2 SV=1;tr|A0A0K2CU86|A0A0K2CU86_SPOFR Enolase OS=Spodoptera frugiperda OX=7108	4	3	3	3	3	3	3	12.9	12.9	12.9	36.739	340	340;378;433;446	0	31.83	12.9	24170000	24170000	1272100	1272100	4				5	711;2898;5149	True;True;True	720;2935;5232	893;3673;6637	1321;1322;5632;10121	1322;5632;10121
A0A0S2MU10	A0A0S2MU10	9	9	9			tr|A0A0S2MU10|A0A0S2MU10_SPOFR GTP-binding nuclear protein OS=Spodoptera frugiperda OX=7108 GN=RAN PE=2 SV=1	1	9	9	9	9	9	9	50.2	50.2	50.2	24.352	213	213	0	48.369	50.2	308060000	308060000	25672000	25672000	17				6	688;1575;2160;2786;3169;3988;4095;4762;5326	True;True;True;True;True;True;True;True;True	697;1596;2187;2823;3210;4047;4159;4838;5409	863;2022;2728;3516;3999;5119;5246;6156;6157;6860	1285;3087;4172;4173;4174;4175;4176;4177;5391;6098;7782;7961;9378;9379;9380;10476;10477	1285;3087;4174;5391;6098;7782;7961;9379;10476
A0A0S2MU13	A0A0S2MU13	4	4	4			tr|A0A0S2MU13|A0A0S2MU13_SPOFR CRM1 OS=Spodoptera frugiperda OX=7108 GN=LOC118265323 PE=2 SV=1	1	4	4	4	4	4	4	5.4	5.4	5.4	121.91	1061	1061	0	6.209	5.4	17892000	17892000	331320	331320	5				7	297;362;5658;6027	True;True;True;True	301;368;5746;6123	380;460;461;7268;7750	550;676;677;11074;11814	550;676;11074;11814
A0A9R0DQX0;A0A191T7V9;A0A2H1W6A7	A0A9R0DQX0;A0A191T7V9	3;3;1	3;3;1	3;3;1			tr|A0A9R0DQX0|A0A9R0DQX0_SPOFR Uncharacterized protein LOC126911016 OS=Spodoptera frugiperda OX=7108 GN=LOC126911016 PE=4 SV=1;tr|A0A191T7V9|A0A191T7V9_SPOFR Uncharacterized protein (Fragment) OS=Spodoptera frugiperda OX=7108 PE=4 SV=1	3	3	3	3	3	3	3	7.7	7.7	7.7	43.572	377	377;363;285	0	9.2519	7.7	422030000	422030000	21101000	21101000	3				8	752;4840;5860	True;True;True	761;4918;5953	942;6262;7516	1414;9542;11445	1414;9542;11445
A0A191T7W2	A0A191T7W2	1	1	1			tr|A0A191T7W2|A0A191T7W2_SPOFR Uncharacterized protein OS=Spodoptera frugiperda OX=7108 PE=4 SV=1	1	1	1	1	1	1	1	3.4	3.4	3.4	41.587	378	378	0	35.793	3.4	143780000	143780000	7987600	7987600	1				9	4123	TRUE	4190	5282	8015	8015
A0A1C7D1B9;A0A9R0EQ39;A0A9R0F5A2;A0A9R0EE10;A0A2H1VY24;A0A2H1VI56	A0A1C7D1B9;A0A9R0EQ39;A0A9R0F5A2;A0A9R0EE10;A0A2H1VY24	12;11;11;10;7;2	12;11;11;10;7;2	12;11;11;10;7;2			tr|A0A1C7D1B9|A0A1C7D1B9_SPOFR Calmodulin OS=Spodoptera frugiperda OX=7108 GN=LOC118276129 PE=1 SV=1;tr|A0A9R0EQ39|A0A9R0EQ39_SPOFR Calmodulin isoform X2 OS=Spodoptera frugiperda OX=7108 GN=LOC118276129 PE=3 SV=1;tr|A0A9R0F5A2|A0A9R0F5A2_SPOFR Calmodulin-a	6	12	12	12	12	12	12	98.7	98.7	98.7	16.81	149	149;153;191;177;162;63	0	159.05	98.7	1158500000	1158500000	128720000	128720000	28				10	106;773;934;996;1005;1188;2226;3530;3737;3738;4701;5382	True;True;True;True;True;True;True;True;True;True;True;True	109;782;946;1013;1022;1206;1207;2254;2255;3578;3787;3788;4776;5466	139;965;1159;1267;1276;1277;1541;1542;2820;2821;2822;2823;4480;4767;4768;4769;6084;6941;6942	200;201;1451;1726;1909;1910;1921;1922;2340;2341;2342;4338;4339;4340;4341;4342;4343;4344;4345;4346;6833;7262;7263;7264;9272;9273;9274;10613;10614;10615	200;1451;1726;1910;1922;2341;4341;6833;7262;7264;9273;10614	0;1	37;110
A0A1S6Q5K6;A0A9R0DNT9;A0A2H1WB52	A0A1S6Q5K6;A0A9R0DNT9;A0A2H1WB52	4;4;4	4;4;4	4;4;4			tr|A0A1S6Q5K6|A0A1S6Q5K6_SPOFR Proteasome subunit alpha 3 (Fragment) OS=Spodoptera frugiperda OX=7108 PE=2 SV=1;tr|A0A9R0DNT9|A0A9R0DNT9_SPOFR Proteasome subunit alpha type OS=Spodoptera frugiperda OX=7108 GN=LOC126910828 PE=3 SV=1;tr|A0A2H1WB52|A0A2H1WB52	3	4	4	4	4	4	4	20	20	20	22.942	205	205;257;493	0	6.9141	20	81404000	81404000	6783700	6783700	5				11	512;3151;3227;5366	True;True;True;True	519;3192;3269;5450	644;3977;4073;6923	950;6068;6203;6204;10591	950;6068;6204;10591
A0A1V0JHU5	A0A1V0JHU5	1	1	1			tr|A0A1V0JHU5|A0A1V0JHU5_SPOFR SFRICE_019474 OS=Spodoptera frugiperda OX=7108 GN=Tsg101 PE=2 SV=1	1	1	1	1	1	1	1	2.5	2.5	2.5	45.414	403	403	0.0096953	1.2506	2.5	3220800	3220800	214720	214720	2				12	1371	TRUE	1392	1775	2725;2726	2725
A0A2H1UZT0	A0A2H1UZT0	4	4	4			tr|A0A2H1UZT0|A0A2H1UZT0_SPOFR Sorting nexin OS=Spodoptera frugiperda OX=7108 GN=LOC126910596 PE=3 SV=1	1	4	4	4	4	4	4	12.2	12.2	12.2	63.859	557	557	0	6.954	12.2	13487000	13487000	518730	518730	6				13	2774;4589;5657;5794	True;True;True;True	2811;4664;5745;5884	3500;3501;5951;7267;7436	5373;5374;9083;11073;11318;11319	5374;9083;11073;11318
A0A9R0D3T7;A0A2H1UZW1	A0A9R0D3T7;A0A2H1UZW1	1;1	1;1	1;1			tr|A0A9R0D3T7|A0A9R0D3T7_SPOFR Ubiquitin conjugation factor E4 A OS=Spodoptera frugiperda OX=7108 GN=LOC118268724 PE=3 SV=1;tr|A0A2H1UZW1|A0A2H1UZW1_SPOFR Ubiquitin conjugation factor E4 A OS=Spodoptera frugiperda OX=7108 GN=SFRICE_002648 PE=3 SV=1	2	1	1	1	1	1	1	1	1	1	116.63	1040	1040;1040	0.0014948	1.7953	1	0	0	0	0	1				14	3844	TRUE	3903	4953	7557	7557
A0A2H1UZY3	A0A2H1UZY3	6	6	6			tr|A0A2H1UZY3|A0A2H1UZY3_SPOFR Eukaryotic translation initiation factor 3 subunit H OS=Spodoptera frugiperda OX=7108 GN=LOC126911027 PE=3 SV=1	1	6	6	6	6	6	6	26.1	26.1	26.1	38.68	337	337	0	29.89	26.1	122960000	122960000	7685200	7685200	10				15	30;1092;1532;2362;3551;4056	True;True;True;True;True;True	30;1109;1553;2393;3599;4120	36;1384;1969;1970;2990;4503;5205	47;2093;2094;3020;3021;3022;4597;4598;6864;7895	47;2093;3021;4598;6864;7895
A0A9R0D6Z3;A0A9R0D782;A0A9R0ELY1;A0A2H1UZY6;A0A2H1VMX8	A0A9R0D6Z3;A0A9R0D782;A0A9R0ELY1;A0A2H1UZY6;A0A2H1VMX8	3;3;3;3;2	3;3;3;3;2	3;3;3;3;2			tr|A0A9R0D6Z3|A0A9R0D6Z3_SPOFR Coronin OS=Spodoptera frugiperda OX=7108 GN=LOC118270966 PE=3 SV=1;tr|A0A9R0D782|A0A9R0D782_SPOFR Coronin OS=Spodoptera frugiperda OX=7108 GN=LOC118270966 PE=3 SV=1;tr|A0A9R0ELY1|A0A9R0ELY1_SPOFR Coronin OS=Spodoptera frugipe	5	3	3	3	3	3	3	3	3	3	116.24	1060	1060;1254;1257;1345;306	0	4.5136	3	8740400	8740400	178370	178370	2				16	2471;3700;5581	True;True;True	2504;3750;5668	3121;4726;7177	4784;7209;10954	4784;7209;10954
A0A9R0E2N4;A0A2H1UZY8	A0A9R0E2N4;A0A2H1UZY8	1;1	1;1	1;1			tr|A0A9R0E2N4|A0A9R0E2N4_SPOFR Pre-rRNA-processing protein TSR1 homolog OS=Spodoptera frugiperda OX=7108 GN=LOC118262148 PE=3 SV=1;tr|A0A2H1UZY8|A0A2H1UZY8_SPOFR Pre-rRNA-processing protein TSR1 homolog OS=Spodoptera frugiperda OX=7108 GN=SFRICE_003045 PE=	2	1	1	1	1	1	1	2.4	2.4	2.4	89.726	787	787;787	0	3.0244	2.4	1091800	1091800	32112	32112	1				17	1607	TRUE	1628	2056	3129	3129
A0A2H1V051;Q8MYA5	A0A2H1V051;Q8MYA5	3;3	3;3	3;3			tr|A0A2H1V051|A0A2H1V051_SPOFR Proliferating cell nuclear antigen OS=Spodoptera frugiperda OX=7108 GN=SFRICE_002452 PE=3 SV=1;tr|Q8MYA5|Q8MYA5_SPOFR Proliferating cell nuclear antigen OS=Spodoptera frugiperda OX=7108 GN=pcna PE=2 SV=1	2	3	3	3	3	3	3	26.3	26.3	26.3	20.724	186	186;260	0	7.8897	26.3	43675000	43675000	4367500	4367500	5				18	854;1601;3327	True;True;True	864;1622;3369	1063;2050;4207	1589;3118;3119;6398;6399	1589;3119;6399
A0A2H1V073	A0A2H1V073	3	3	3			tr|A0A2H1V073|A0A2H1V073_SPOFR rRNA 2-O-methyltransferase fibrillarin OS=Spodoptera frugiperda OX=7108 GN=LOC118276839 PE=3 SV=1	1	3	3	3	3	3	3	13.4	13.4	13.4	33.001	320	320	0	3.677	13.4	49499000	49499000	2911700	2911700	3				19	2588;2875;5133	True;True;True	2623;2912;5216	3270;3648;6619	5013;5590;10094	5013;5590;10094
A0A9R0ETB9;A0A2H1V0S4	A0A9R0ETB9;A0A2H1V0S4	5;5	5;5	5;5			tr|A0A9R0ETB9|A0A9R0ETB9_SPOFR LOW QUALITY PROTEIN: pseudouridylate synthase 7 homolog OS=Spodoptera frugiperda OX=7108 GN=LOC118282261 PE=3 SV=1;tr|A0A2H1V0S4|A0A2H1V0S4_SPOFR SFRICE_003099 OS=Spodoptera frugiperda OX=7108 GN=SFRICE_003099 PE=3 SV=1	2	5	5	5	5	5	5	10.3	10.3	10.3	90.019	798	798;798	0	8.3068	10.3	64235000	64235000	1459900	1459900	2				20	2361;3482;4104;5956;5982	True;True;True;True;True	2392;3528;4170;6052;6078	2989;4421;5259;7639;7667	4596;6752;7983;11626;11665	4596;6752;7983;11626;11665
A0A9R0CVZ2;A0A2H1V0X0	A0A9R0CVZ2;A0A2H1V0X0	17;17	17;17	17;17			tr|A0A9R0CVZ2|A0A9R0CVZ2_SPOFR Cysteine--tRNA ligase, cytoplasmic OS=Spodoptera frugiperda OX=7108 GN=LOC118263278 PE=3 SV=1;tr|A0A2H1V0X0|A0A2H1V0X0_SPOFR Cysteine--tRNA ligase, cytoplasmic OS=Spodoptera frugiperda OX=7108 GN=SFRICE_007289 PE=3 SV=1	2	17	17	17	17	17	17	29.5	29.5	29.5	81.769	723	723;723	0	37.344	29.5	427550000	427550000	10180000	10180000	18				21	54;70;327;1228;1301;1912;2770;2980;3055;3599;3638;3915;4171;4284;4721;4784;6021	True;True;True;True;True;True;True;True;True;True;True;True;True;True;True;True;True	56;72;331;1247;1322;1937;2807;3018;3094;3648;3687;3974;4239;4353;4796;4860;6117	66;86;416;1589;1691;2410;3496;3769;3857;4609;4650;5034;5354;5492;6105;6182;7743;7744	93;117;606;2409;2597;3666;3667;5369;5756;5887;7050;7111;7660;8114;8299;9302;9422;11804;11805	93;117;606;2409;2597;3667;5369;5756;5887;7050;7111;7660;8114;8299;9302;9422;11804
A0A2H1V0Z9	A0A2H1V0Z9	5	5	5			tr|A0A2H1V0Z9|A0A2H1V0Z9_SPOFR Protein unc-45 homolog B OS=Spodoptera frugiperda OX=7108 GN=LOC118274680 PE=4 SV=1	1	5	5	5	5	5	5	5.6	5.6	5.6	105.69	944	944	0	5.0329	5.6	15359000	15359000	243800	243800	5				22	1876;1913;1998;3128;5393	True;True;True;True;True	1901;1938;2024;3168;5479	2370;2411;2521;3950;6956	3603;3668;3821;6030;10633	3603;3668;3821;6030;10633
A0A9R0DCL0;A0A9R0EXI0;A0A9R0DSM6;A0A9R0DCI5;A0A9R0DCY8;A0A9R0EPZ2;A0A9R0EYL7;A0A9R0ENS4;A0A9R0DU27;A0A2H1V105	A0A9R0DCL0;A0A9R0EXI0;A0A9R0DSM6;A0A9R0DCI5;A0A9R0DCY8;A0A9R0EPZ2;A0A9R0EYL7;A0A9R0ENS4;A0A9R0DU27;A0A2H1V105	3;3;3;3;3;3;3;3;3;3	3;3;3;3;3;3;3;3;3;3	3;3;3;3;3;3;3;3;3;3			tr|A0A9R0DCL0|A0A9R0DCL0_SPOFR Serine/arginine repetitive matrix protein 1 isoform X20 OS=Spodoptera frugiperda OX=7108 GN=LOC118274689 PE=4 SV=1;tr|A0A9R0EXI0|A0A9R0EXI0_SPOFR Uncharacterized protein LOC118274689 isoform X17 OS=Spodoptera frugiperda OX=71	10	3	3	3	3	3	3	6.1	6.1	6.1	79.273	734	734;764;765;807;808;1054;1085;1085;1128;1416	0	6.7166	6.1	43677000	43677000	1364900	1364900	4				23	50;1504;4469	True;True;True	52;1525;4541	62;1938;5772	84;2984;8738;8739	84;2984;8739
A0A9R0EPD2;A0A9R0DCM6;A0A9R0DCQ9;A0A2H1V134	A0A9R0EPD2;A0A9R0DCM6;A0A9R0DCQ9;A0A2H1V134	2;2;2;2	2;2;2;2	2;2;2;2			tr|A0A9R0EPD2|A0A9R0EPD2_SPOFR Oxysterol-binding protein 1 isoform X3 OS=Spodoptera frugiperda OX=7108 GN=LOC118274691 PE=4 SV=1;tr|A0A9R0DCM6|A0A9R0DCM6_SPOFR Oxysterol-binding protein OS=Spodoptera frugiperda OX=7108 GN=LOC118274691 PE=3 SV=1;tr|A0A9R0DC	4	2	2	2	2	2	2	4	4	4	84.099	755	755;780;781;792	0	3.0479	4	4421700	4421700	126330	126330	2				24	2515;3318	True;True	2549;3360	3174;4194	4869;6377	4869;6377
A0A9R0DH15;A0A2H1V157	A0A9R0DH15;A0A2H1V157	2;2	2;2	2;2			tr|A0A9R0DH15|A0A9R0DH15_SPOFR V-type proton ATPase subunit E OS=Spodoptera frugiperda OX=7108 GN=LOC118278043 PE=3 SV=1;tr|A0A2H1V157|A0A2H1V157_SPOFR SFRICE_007086 OS=Spodoptera frugiperda OX=7108 GN=SFRICE_007086 PE=3 SV=1	2	2	2	2	2	2	2	10.6	10.6	10.6	26.16	226	226;226	0	4.5312	10.6	2746600	2746600	228880	228880	2				25	2550;3016	True;True	2584;3054	3217;3811	4931;5821	4931;5821
A0A2H1V1A5;A0A9R0D502	A0A2H1V1A5;A0A9R0D502	10;10	10;10	10;10			tr|A0A2H1V1A5|A0A2H1V1A5_SPOFR SFRICE_025363 OS=Spodoptera frugiperda OX=7108 GN=LOC118269459 PE=3 SV=1;tr|A0A9R0D502|A0A9R0D502_SPOFR mRNA-decapping enzyme 1A isoform X1 OS=Spodoptera frugiperda OX=7108 GN=LOC118269459 PE=3 SV=1	2	10	10	10	10	10	10	37.6	37.6	37.6	44.521	404	404;405	0	42.923	37.6	177390000	177390000	7712700	7712700	21				26	193;415;1321;1384;3135;3333;3521;3919;4040;4870	True;True;True;True;True;True;True;True;True;True	197;422;1342;1405;3175;3375;3569;3978;4102;4949	257;529;1714;1792;3957;4213;4470;5038;5183;6297	385;772;773;774;2628;2629;2752;6040;6041;6042;6043;6407;6408;6816;7667;7866;9596;9597;9598;9599;9600;9601	385;773;2629;2752;6043;6408;6816;7667;7866;9601
A0A9R0DBH4;A0A9R0DB70;A0A9R0DBQ3;A0A9R0EPB4;A0A9R0EN64;A0A2H1V1E5;A0A9R0DBH2;A0A9R0DBD4;A0A9R0ENL2;A0A9R0DBT2;A0A9R0ENL4	A0A9R0DBH4;A0A9R0DB70;A0A9R0DBQ3;A0A9R0EPB4;A0A9R0EN64;A0A2H1V1E5;A0A9R0DBH2;A0A9R0DBD4;A0A9R0ENL2;A0A9R0DBT2;A0A9R0ENL4	10;10;10;10;10;10;10;10;10;10;10	10;10;10;10;10;10;10;10;10;10;10	10;10;10;10;10;10;10;10;10;10;10			tr|A0A9R0DBH4|A0A9R0DBH4_SPOFR Zinc finger RNA-binding protein 2 isoform X10 OS=Spodoptera frugiperda OX=7108 GN=LOC118273929 PE=4 SV=1;tr|A0A9R0DB70|A0A9R0DB70_SPOFR Zinc finger RNA-binding protein isoform X9 OS=Spodoptera frugiperda OX=7108 GN=LOC1182739	11	10	10	10	10	10	10	14.5	14.5	14.5	96.009	891	891;910;916;917;918;918;919;919;920;924;925	0	25.278	14.5	281660000	281660000	6550300	6550300	17				27	656;1051;1925;2050;3147;3718;3846;4724;5516;5661	True;True;True;True;True;True;True;True;True;True	664;1068;1950;2077;3188;3768;3905;4799;5603;5749	821;1333;2424;2582;3971;4746;4747;4748;4955;6108;6109;6110;7103;7272	1222;2011;3684;3916;6061;7235;7236;7237;7238;7239;7240;7559;7560;9305;9306;9307;10848;11079	1222;2011;3684;3916;6061;7236;7559;9306;10848;11079
A0A2H1V1E6;A0A9R0DPR5	A0A2H1V1E6;A0A9R0DPR5	9;8	9;8	9;8			tr|A0A2H1V1E6|A0A2H1V1E6_SPOFR SFRICE_031255 OS=Spodoptera frugiperda OX=7108 GN=LOC118266314 PE=3 SV=1;tr|A0A9R0DPR5|A0A9R0DPR5_SPOFR cAMP-dependent protein kinase type II regulatory subunit isoform X2 OS=Spodoptera frugiperda OX=7108 GN=LOC118266314 PE=3	2	9	9	9	9	9	9	27.1	27.1	27.1	43.539	384	384;329	0	24.648	27.1	161110000	161110000	7671900	7671900	10				28	336;393;464;2556;3255;4451;4689;5095;5284	True;True;True;True;True;True;True;True;True	340;400;471;2591;3297;4523;4764;5177;5367	426;498;588;3225;4104;5746;6065;6066;6577;6813	620;727;858;4939;4940;6247;8686;9250;9251;10035;10409	620;727;858;4939;6247;8686;9251;10035;10409
A0A2H1V1I3;A0A9R0EL63;A0A9R0EKB9	A0A2H1V1I3;A0A9R0EL63;A0A9R0EKB9	1;1;1	1;1;1	1;1;1			tr|A0A2H1V1I3|A0A2H1V1I3_SPOFR SFRICE_014901 (Fragment) OS=Spodoptera frugiperda OX=7108 GN=SFRICE_014901 PE=4 SV=1;tr|A0A9R0EL63|A0A9R0EL63_SPOFR Uncharacterized protein LOC118269658 isoform X2 OS=Spodoptera frugiperda OX=7108 GN=LOC118269658 PE=4 SV=1;tr	3	1	1	1	1	1	1	1.7	1.7	1.7	77.337	705	705;809;840	0.0095628	1.1786	1.7	12218000	12218000	421310	421310	0				29	4655	TRUE	4730	6023	9184	9184
A0A2H1V1R4	A0A2H1V1R4	11	1	1			tr|A0A2H1V1R4|A0A2H1V1R4_SPOFR Dipeptidyl peptidase 3 (Fragment) OS=Spodoptera frugiperda OX=7108 GN=SFRICE_014995 PE=3 SV=1	1	11	1	1	11	1	1	20.1	2.7	2.7	75.609	666	666	0	5.8075	20.1	39659000	39659000	967290	967290	1				30	112;149;1332;1640;1732;1736;2328;2330;2942;3978;4100	False;False;False;False;False;False;False;False;True;False;False	115;152;1353;1662;1756;1760;2359;2361;2979;4037;4164	146;191;1726;2095;2206;2212;2951;2954;3724;5109;5252	210;263;2649;3188;3344;3345;3352;4542;4545;5694;7768;7969	210;263;2649;3188;3344;3352;4542;4545;5694;7768;7969
A0A9R0F2G5;A0A2H1V1X4	A0A9R0F2G5;A0A2H1V1X4	4;4	4;4	4;4			tr|A0A9R0F2G5|A0A9R0F2G5_SPOFR Uncharacterized protein LOC126912033 OS=Spodoptera frugiperda OX=7108 GN=LOC126912033 PE=3 SV=1;tr|A0A2H1V1X4|A0A2H1V1X4_SPOFR SFRICE_001989 OS=Spodoptera frugiperda OX=7108 GN=SFRICE_001989 PE=3 SV=1	2	4	4	4	4	4	4	26.2	26.2	26.2	15.832	141	141;141	0	5.1567	26.2	51802000	51802000	5755800	5755800	4				31	3081;3306;3933;5692	True;True;True;True	3120;3348;3992;5781	3889;4178;5054;7316	5936;6358;7692;11164	5936;6358;7692;11164
A0A2H1V1Y3	A0A2H1V1Y3	5	5	5			tr|A0A2H1V1Y3|A0A2H1V1Y3_SPOFR Tyrosine--tRNA ligase OS=Spodoptera frugiperda OX=7108 GN=LOC126913064 PE=3 SV=1	1	5	5	5	5	5	5	11.5	11.5	11.5	58.257	523	523	0	19.057	11.5	81448000	81448000	2143400	2143400	6				32	416;2280;3256;3815;5248	True;True;True;True;True	423;2309;3298;3871;5331	530;2888;4105;4915;4916;6768;6769	775;4447;6248;7500;7501;7502;10344;10345	775;4447;6248;7502;10344
A0A9R0D811;A0A2H1V225	A0A9R0D811;A0A2H1V225	8;8	8;8	8;8			tr|A0A9R0D811|A0A9R0D811_SPOFR peptidylprolyl isomerase OS=Spodoptera frugiperda OX=7108 GN=LOC118271816 PE=4 SV=1;tr|A0A2H1V225|A0A2H1V225_SPOFR peptidylprolyl isomerase OS=Spodoptera frugiperda OX=7108 GN=SFRICE_001671 PE=4 SV=1	2	8	8	8	8	8	8	14.9	14.9	14.9	85.286	740	740;1078	0	34.941	14.9	186600000	186600000	7177000	7177000	14				33	522;2257;2371;2601;2660;3362;4545;5876	True;True;True;True;True;True;True;True	529;2286;2402;2636;2696;3405;4618;5969	655;656;2863;3002;3284;3285;3362;4286;5865;7539	973;974;4419;4626;5031;5032;5033;5034;5139;5140;6558;8870;11480;11481	974;4419;4626;5031;5139;6558;8870;11480
A0A2H1V253;A0A9R0CXU1;A0A2H1VI04	A0A2H1V253;A0A9R0CXU1	7;7;2	7;7;2	7;7;2			tr|A0A2H1V253|A0A2H1V253_SPOFR 3-hydroxyisobutyrate dehydrogenase OS=Spodoptera frugiperda OX=7108 GN=SFRICE_012523 PE=3 SV=1;tr|A0A9R0CXU1|A0A9R0CXU1_SPOFR 3-hydroxyisobutyrate dehydrogenase OS=Spodoptera frugiperda OX=7108 GN=LOC118264573 PE=3 SV=1	3	7	7	7	7	7	7	32.2	32.2	32.2	33.729	320	320;320;133	0	54.061	32.2	148790000	148790000	8266300	8266300	10				34	3546;4077;4234;4269;4777;5541;5749	True;True;True;True;True;True;True	3594;4141;4303;4338;4853;5628;5839	4497;5226;5434;5476;6174;7131;7383	6854;6855;7934;8221;8222;8279;9407;9408;10888;11255	6855;7934;8222;8279;9408;10888;11255
A0A2H1V261;A0A9R0CUT5;A0A9R0CUP4	A0A2H1V261;A0A9R0CUT5;A0A9R0CUP4	2;2;2	2;2;2	2;2;2			tr|A0A2H1V261|A0A2H1V261_SPOFR SFRICE_003468 OS=Spodoptera frugiperda OX=7108 GN=SFRICE_003468 PE=4 SV=1;tr|A0A9R0CUT5|A0A9R0CUT5_SPOFR non-specific serine/threonine protein kinase OS=Spodoptera frugiperda OX=7108 GN=LOC118262560 PE=3 SV=1;tr|A0A9R0CUP4|A0	3	2	2	2	2	2	2	6.5	6.5	6.5	62.895	550	550;741;756	0.0014925	1.7339	6.5	2478700	2478700	85471	85471	2				35	4270;5162	True;True	4339;5245	5477;6652	8280;10138	8280;10138
A0A9R0CUU7;A0A9R0EF74;A0A9R0CUY1;A0A2H1V2D8	A0A9R0CUU7;A0A9R0EF74;A0A9R0CUY1;A0A2H1V2D8	2;2;2;2	2;2;2;2	2;2;2;2			tr|A0A9R0CUU7|A0A9R0CUU7_SPOFR Heterogeneous nuclear ribonucleoprotein A1 isoform X3 OS=Spodoptera frugiperda OX=7108 GN=LOC118262649 PE=4 SV=1;tr|A0A9R0EF74|A0A9R0EF74_SPOFR Heterogeneous nuclear ribonucleoprotein A1 isoform X2 OS=Spodoptera frugiperda OX	4	2	2	2	2	2	2	8.6	8.6	8.6	38.187	349	349;363;364;364	0	19.236	8.6	43806000	43806000	3369700	3369700	2				36	377;2473	True;True	384;2506	479;3123	699;4787	699;4787
A0A2H1V2E1;A0A9R0DCM4	A0A2H1V2E1;A0A9R0DCM4	7;7	7;7	7;7			tr|A0A2H1V2E1|A0A2H1V2E1_SPOFR Polymerase delta-interacting protein 2 isoform X2 OS=Spodoptera frugiperda OX=7108 GN=LOC118274445 PE=4 SV=1;tr|A0A9R0DCM4|A0A9R0DCM4_SPOFR Polymerase delta-interacting protein 2 isoform X1 OS=Spodoptera frugiperda OX=7108 GN	2	7	7	7	7	7	7	28.5	28.5	28.5	39.168	344	344;350	0	15.98	28.5	104230000	104230000	4963200	4963200	8				37	1549;2000;2329;3930;4737;5642;5718	True;True;True;True;True;True;True	1570;2026;2360;3989;4812;5730;5807	1993;2523;2952;2953;5050;6125;7247;7345	3049;3823;4543;4544;7685;7686;9325;11043;11207	3049;3823;4543;7685;9325;11043;11207
A0A2H1V2E8	A0A2H1V2E8	2	2	2			tr|A0A2H1V2E8|A0A2H1V2E8_SPOFR T-complex protein 1 subunit zeta OS=Spodoptera frugiperda OX=7108 GN=LOC118274639 PE=3 SV=1	1	2	2	2	2	2	2	3.6	3.6	3.6	57.741	531	531	0	2.4606	3.6	7663700	7663700	239490	239490	4				38	1813;2214	True;True	1837;2242	2300;2801	3506;4296;4297;4298	3506;4297
A0A2H1V2N3;A0A9R0DQL4;E9KHW3	A0A2H1V2N3;A0A9R0DQL4;E9KHW3	16;16;10	16;16;10	16;16;10			tr|A0A2H1V2N3|A0A2H1V2N3_SPOFR SFRICE_006722 OS=Spodoptera frugiperda OX=7108 GN=SFRICE_006722 PE=4 SV=1;tr|A0A9R0DQL4|A0A9R0DQL4_SPOFR Protein arginine N-methyltransferase 1 OS=Spodoptera frugiperda OX=7108 GN=LOC126910948 PE=4 SV=1;tr|E9KHW3|E9KHW3_SPOFR	3	16	16	16	16	16	16	46.4	46.4	46.4	42.433	366	366;356;244	0	125	46.4	1296500000	1296500000	58931000	58931000	24				39	97;682;1134;1741;2506;2709;2727;2845;3089;3479;3691;3692;4103;4388;5293;5452	True;True;True;True;True;True;True;True;True;True;True;True;True;True;True;True	99;691;1151;1765;2540;2745;2763;2882;3128;3525;3741;3742;4169;4459;5376;5539	128;856;1435;2217;3164;3417;3441;3605;3606;3899;3900;4418;4716;4717;5258;5667;6824;7024	182;1274;2183;3358;3359;3360;3361;4845;4846;4847;5225;5261;5528;5529;5952;5953;6748;7197;7198;7982;8570;10424;10425;10722	182;1274;2183;3360;4845;5225;5261;5529;5953;6748;7197;7198;7982;8570;10425;10722
A0A2H1V2Q3	A0A2H1V2Q3	1	1	1			tr|A0A2H1V2Q3|A0A2H1V2Q3_SPOFR Succinyl-CoA:3-ketoacid-coenzyme A transferase OS=Spodoptera frugiperda OX=7108 GN=LOC118262056 PE=3 SV=1	1	1	1	1	1	1	1	1.9	1.9	1.9	56.486	519	519	0.0015221	1.882	1.9	5747800	5747800	221070	221070	1				40	5775	TRUE	5865	7416	11293	11293
A0A2H1VAM8;A0A2H1V2R2	A0A2H1VAM8;A0A2H1V2R2	2;2	2;2	2;2			tr|A0A2H1VAM8|A0A2H1VAM8_SPOFR SFRICE_019472 (Fragment) OS=Spodoptera frugiperda OX=7108 GN=SFRICE_019472 PE=4 SV=1;tr|A0A2H1V2R2|A0A2H1V2R2_SPOFR Transcription initiation factor IIE subunit beta OS=Spodoptera frugiperda OX=7108 GN=LOC118265221 PE=3 SV=1	2	2	2	2	2	2	2	16	16	16	24.603	213	213;295	0.0095759	1.2046	16	10419000	10419000	947210	947210	3				41	1852;4686	True;True	1877;4761	2345;2346;6062	3566;3567;9247	3566;9247
A0A2H1V2T2	A0A2H1V2T2	2	2	2			tr|A0A2H1V2T2|A0A2H1V2T2_SPOFR Peptidyl-prolyl cis-trans isomerase OS=Spodoptera frugiperda OX=7108 GN=LOC118278058 PE=4 SV=1	1	2	2	2	2	2	2	12.7	12.7	12.7	17.769	157	157	0.0014577	1.5729	12.7	13925000	13925000	1392500	1392500	2				42	680;4176	True;True	689;4244	854;5360	1271;8123	1271;8123
A0A2H1V301;A0A2H1V345;A0A9R0DK98	A0A2H1V301;A0A2H1V345;A0A9R0DK98	3;3;3	3;3;3	3;3;3			tr|A0A2H1V301|A0A2H1V301_SPOFR SFRICE_035708 OS=Spodoptera frugiperda OX=7108 GN=SFRICE_035708 PE=4 SV=1;tr|A0A2H1V345|A0A2H1V345_SPOFR SFRICE_034985 OS=Spodoptera frugiperda OX=7108 GN=SFRICE_034985 PE=4 SV=1;tr|A0A9R0DK98|A0A9R0DK98_SPOFR Eukaryotic tran	3	3	3	3	3	3	3	24.6	24.6	24.6	25.181	228	228;228;278	0	28.119	24.6	26327000	26327000	1880500	1880500	8				43	1477;2581;4413	True;True;True	1498;2616;4484	1906;3261;5696	2942;2943;4994;4995;8614;8615;8616;8617	2943;4994;8616
A0A2H1V339	A0A2H1V339	10	10	10			tr|A0A2H1V339|A0A2H1V339_SPOFR Mitotic checkpoint protein BUB3 OS=Spodoptera frugiperda OX=7108 GN=LOC118272682 PE=3 SV=1	1	10	10	10	10	10	10	33.7	33.7	33.7	37.661	332	332	0	23.866	33.7	284330000	284330000	17771000	17771000	14				44	723;1654;2331;3627;4717;5319;5643;5802;5950;6022	True;True;True;True;True;True;True;True;True;True	732;1677;2362;3676;4792;5402;5731;5892;6046;6118	905;2110;2955;4638;6101;6853;7248;7445;7629;7630;7745	1346;3208;4546;7093;7094;9292;9293;10468;11044;11339;11616;11617;11806;11807	1346;3208;4546;7093;9293;10468;11044;11339;11616;11806
A0A9R0EMS3;A0A2H1V346	A0A9R0EMS3;A0A2H1V346	1;1	1;1	1;1			tr|A0A9R0EMS3|A0A9R0EMS3_SPOFR Translin-associated protein X OS=Spodoptera frugiperda OX=7108 GN=LOC118272920 PE=3 SV=1;tr|A0A2H1V346|A0A2H1V346_SPOFR Translin-associated protein X OS=Spodoptera frugiperda OX=7108 GN=SFRICE_000216 PE=3 SV=1	2	1	1	1	1	1	1	5.7	5.7	5.7	31.419	282	282;282	0	4.7082	5.7	0	0	0	0	1				45	4649	TRUE	4724	6016	9175	9175
A0A9R0ETW3;A0A2H1V359	A0A9R0ETW3;A0A2H1V359	1;1	1;1	1;1			tr|A0A9R0ETW3|A0A9R0ETW3_SPOFR Brefeldin A-inhibited guanine nucleotide-exchange protein 1 isoform X2 OS=Spodoptera frugiperda OX=7108 GN=LOC118272918 PE=4 SV=1;tr|A0A2H1V359|A0A2H1V359_SPOFR Brefeldin A-inhibited guanine nucleotide-exchange protein 1 isof	2	1	1	1	1	1	1	0.4	0.4	0.4	190.05	1687	1687;1717	0.0095109	1.1513	0.4	0	0	0	0	1				46	4266	TRUE	4335	5472	8275	8275
A0A9R0F7H0;A0A2H1V364;A0A9R0ENU5;A0A9R0DCA6	A0A9R0F7H0;A0A2H1V364;A0A9R0ENU5;A0A9R0DCA6	11;11;10;10	11;11;10;10	11;11;10;10			tr|A0A9R0F7H0|A0A9R0F7H0_SPOFR ATP-dependent Clp protease ATP-binding subunit clpX-like, mitochondrial isoform X3 OS=Spodoptera frugiperda OX=7108 GN=LOC118274145 PE=4 SV=1;tr|A0A2H1V364|A0A2H1V364_SPOFR SFRICE_007347 OS=Spodoptera frugiperda OX=7108 GN=SF	4	11	11	11	11	11	11	23.7	23.7	23.7	62.517	569	569;627;581;581	0	30.698	23.7	128530000	128530000	4284200	4284200	13				47	31;463;822;832;957;1587;2230;3283;3865;4760;5561	True;True;True;True;True;True;True;True;True;True;True	31;470;832;842;970;1608;2259;3325;3924;4836;5648	37;38;587;1019;1031;1186;2036;2829;4151;4975;6153;7155	48;49;857;1528;1542;1765;3103;4353;4354;6322;7592;7593;9375;10928	48;857;1528;1542;1765;3103;4354;6322;7593;9375;10928
A0A2H1V392	A0A2H1V392	33	33	33			tr|A0A2H1V392|A0A2H1V392_SPOFR vesicle-fusing ATPase OS=Spodoptera frugiperda OX=7108 GN=LOC118265900 PE=4 SV=1	1	33	33	33	33	33	33	57.6	57.6	57.6	89.157	806	806	0	156.63	57.6	1247100000	1247100000	28342000	28342000	61				48	150;199;541;742;952;1064;1161;1209;1247;1357;1487;1790;1819;1896;2004;2663;2688;2829;2871;2901;2994;3080;3199;3481;3690;4055;4194;4533;4828;4908;5473;5712;5734	True;True;True;True;True;True;True;True;True;True;True;True;True;True;True;True;True;True;True;True;True;True;True;True;True;True;True;True;True;True;True;True;True	153;203;548;751;965;1081;1179;1228;1268;1378;1508;1814;1844;1921;2030;2699;2724;2866;2908;2938;3032;3119;3241;3527;3740;4119;4263;4606;4906;4988;5560;5801;5824	192;265;680;929;1180;1346;1468;1567;1623;1759;1760;1916;2275;2308;2393;2527;3365;3392;3584;3641;3642;3676;3785;3887;3888;4038;4039;4420;4715;5204;5388;5852;6248;6249;6345;7051;7339;7363	264;396;397;398;399;1015;1393;1756;1757;2027;2226;2379;2477;2702;2703;2704;2956;3458;3514;3637;3829;5146;5184;5495;5496;5581;5582;5636;5782;5783;5784;5785;5929;5930;5931;5932;5933;5934;5935;6147;6148;6149;6750;6751;7196;7894;8155;8852;9522;9523;9524;9683;9684;9685;9686;9687;9688;9689;10772;10773;11201;11228	264;397;1015;1393;1757;2027;2226;2379;2477;2704;2956;3458;3514;3637;3829;5146;5184;5496;5582;5636;5784;5929;6147;6751;7196;7894;8155;8852;9523;9684;10773;11201;11228
A0A2H1V398	A0A2H1V398	3	3	3			tr|A0A2H1V398|A0A2H1V398_SPOFR DNA replication licensing factor MCM7 OS=Spodoptera frugiperda OX=7108 GN=LOC118262492 PE=3 SV=1	1	3	3	3	3	3	3	5.4	5.4	5.4	80.988	719	719	0.0015175	1.8682	5.4	66941000	66941000	1859500	1859500	3				49	2121;2246;3480	True;True;True	2148;2275;3526	2679;2849;4419	4056;4400;6749	4056;4400;6749
A0A9R0F740;A0A9R0DF38;A0A9R0EQL3;A0A2H1V442;A0A9R0DEK8;A0A2H1V0U2;A0A9R0EDE6	A0A9R0F740;A0A9R0DF38;A0A9R0EQL3;A0A2H1V442	16;16;16;16;1;1;1	16;16;16;16;1;1;1	16;16;16;16;1;1;1			tr|A0A9R0F740|A0A9R0F740_SPOFR acetyl-CoA C-acetyltransferase OS=Spodoptera frugiperda OX=7108 GN=LOC118276445 PE=3 SV=1;tr|A0A9R0DF38|A0A9R0DF38_SPOFR acetyl-CoA C-acetyltransferase OS=Spodoptera frugiperda OX=7108 GN=LOC118276445 PE=3 SV=1;tr|A0A9R0EQL3|	7	16	16	16	16	16	16	57.6	57.6	57.6	42.023	399	399;422;489;512;396;396;436	0	98.356	57.6	675910000	675910000	30723000	30723000	23				50	144;145;1253;1496;1692;1746;1953;1985;3242;4208;4350;4427;4850;5614;5682;5743	True;True;True;True;True;True;True;True;True;True;True;True;True;True;True;True	147;148;1274;1517;1716;1770;1979;2011;3284;4277;4421;4499;4928;5702;5771;5833	184;185;1631;1928;1929;2157;2222;2223;2469;2470;2508;4089;5403;5621;5713;6274;7214;7215;7305;7373;7374	255;256;257;2495;2971;2972;3278;3369;3370;3744;3745;3805;6231;8177;8512;8637;9559;11001;11002;11149;11241;11242;11243	255;256;2495;2972;3278;3369;3744;3805;6231;8177;8512;8637;9559;11002;11149;11243
A0A9R0CZN5;A0A9R0EI11;A0A2H1V4F9	A0A9R0CZN5;A0A9R0EI11;A0A2H1V4F9	2;2;2	2;2;2	2;2;2			tr|A0A9R0CZN5|A0A9R0CZN5_SPOFR Prostatic acid phosphatase isoform X2 OS=Spodoptera frugiperda OX=7108 GN=LOC118265922 PE=3 SV=1;tr|A0A9R0EI11|A0A9R0EI11_SPOFR Prostatic acid phosphatase isoform X1 OS=Spodoptera frugiperda OX=7108 GN=LOC118265922 PE=3 SV=1;	3	2	2	2	2	2	2	7.2	7.2	7.2	41.995	362	362;416;422	0	2.8437	7.2	13869000	13869000	770480	770480	2				51	1479;5991	True;True	1500;6087	1908;7707	2946;11754	2946;11754
A0A2H1V4K5;A0A9R0DCL4	A0A2H1V4K5;A0A9R0DCL4	4;3	3;3	3;3			tr|A0A2H1V4K5|A0A2H1V4K5_SPOFR SFRICE_013970 OS=Spodoptera frugiperda OX=7108 GN=SFRICE_013970 PE=4 SV=1;tr|A0A9R0DCL4|A0A9R0DCL4_SPOFR Uncharacterized protein LOC118274465 OS=Spodoptera frugiperda OX=7108 GN=LOC118274465 PE=4 SV=1	2	4	3	3	4	3	3	1.9	1.5	1.5	273.44	2319	2319;1171	0	3.1264	1.9	13638000	13638000	109110	109110	2				52	679;2686;3529;4081	True;True;True;False	688;2722;3577;4145	853;3390;4479;5230	1270;5182;6832;7939;7940	1270;5182;6832;7940
X4Z1B2;A0A2H1V4T4	X4Z1B2;A0A2H1V4T4	4;4	4;4	4;4			tr|X4Z1B2|X4Z1B2_SPOFR Actin related protein 2/3 complex subunit 4 (Fragment) OS=Spodoptera frugiperda OX=7108 GN=ARPC4 PE=2 SV=1;tr|A0A2H1V4T4|A0A2H1V4T4_SPOFR Actin-related protein 2/3 complex subunit 4 OS=Spodoptera frugiperda OX=7108 GN=LOC118274478 PE	2	4	4	4	4	4	4	23.8	23.8	23.8	19.796	168	168;168	0	7.0001	23.8	39996000	39996000	4444000	4444000	12				53	136;1205;4536;5954	True;True;True;True	139;1224;4609;6050	175;1563;5855;7636;7637	244;245;2369;2370;2371;2372;2373;2374;2375;8859;11623;11624	244;2371;8859;11623
A0A2H1V4U7;A0A9R0DCW2;A0A2H1WQU8	A0A2H1V4U7;A0A9R0DCW2	3;3;1	3;3;1	3;3;1			tr|A0A2H1V4U7|A0A2H1V4U7_SPOFR SFRICE_008800 OS=Spodoptera frugiperda OX=7108 GN=LOC118274888 PE=3 SV=1;tr|A0A9R0DCW2|A0A9R0DCW2_SPOFR Ubiquitin recognition factor in ER-associated degradation protein 1 isoform X2 OS=Spodoptera frugiperda OX=7108 GN=LOC118	3	3	3	3	3	3	3	12.3	12.3	12.3	34.823	309	309;307;223	0	6.458	12.3	19397000	19397000	1293100	1293100	3				54	1592;2395;3352	True;True;True	1613;2426;3395	2041;3029;4276	3109;4665;4666;6546	3109;4666;6546
A0A2H1V4V5;Q962U2	A0A2H1V4V5;Q962U2	2;2	2;2	2;2			tr|A0A2H1V4V5|A0A2H1V4V5_SPOFR 60S ribosomal protein L11 OS=Spodoptera frugiperda OX=7108 GN=LOC118272042 PE=3 SV=1;sp|Q962U2|RL11_SPOFR Large ribosomal subunit protein uL5 OS=Spodoptera frugiperda OX=7108 GN=RpL11 PE=2 SV=1	2	2	2	2	2	2	2	11.9	11.9	11.9	22.223	194	194;195	0	6.1115	11.9	51922000	51922000	5769100	5769100	2				55	5523;5845	True;True	5610;5938	7111;7500	10860;11423	10860;11423
A0A2H1V517	A0A2H1V517	5	5	5			tr|A0A2H1V517|A0A2H1V517_SPOFR Importin subunit alpha OS=Spodoptera frugiperda OX=7108 GN=LOC126912176 PE=3 SV=1	1	5	5	5	5	5	5	13.8	13.8	13.8	56.703	515	515	0	11.381	13.8	104830000	104830000	4557900	4557900	5				56	1300;3188;3650;3901;5079	True;True;True;True;True	1321;3230;3699;3960;5161	1690;4023;4666;5020;6561	2596;6129;7138;7645;10015	2596;6129;7138;7645;10015
A0A2H1V5C0	A0A2H1V5C0	1	1	1			tr|A0A2H1V5C0|A0A2H1V5C0_SPOFR T-complex protein 1 subunit delta OS=Spodoptera frugiperda OX=7108 GN=LOC118281587 PE=3 SV=1	1	1	1	1	1	1	1	3.7	3.7	3.7	56.888	541	541	0	4.3122	3.7	12306000	12306000	384570	384570	1				57	27	TRUE	27	33	43	43
A0A2H1V5C6;A0A9R0D297;A0A9R0EJ65	A0A2H1V5C6;A0A9R0D297;A0A9R0EJ65	5;5;5	5;5;5	5;5;5			tr|A0A2H1V5C6|A0A2H1V5C6_SPOFR SFRICE_000473 OS=Spodoptera frugiperda OX=7108 GN=SFRICE_000473 PE=3 SV=1;tr|A0A9R0D297|A0A9R0D297_SPOFR Interferon regulatory factor 2-binding protein 1 isoform X2 OS=Spodoptera frugiperda OX=7108 GN=LOC118267419 PE=3 SV=1;t	3	5	5	5	5	5	5	15.1	15.1	15.1	45.272	423	423;423;429	0	6.215	15.1	101650000	101650000	4419500	4419500	7				58	1431;2904;3007;5150;5157	True;True;True;True;True	1452;2941;3045;5233;5240	1850;3679;3799;6638;6647	2835;5639;5640;5807;5808;10122;10132	2835;5640;5807;10122;10132
A0A2H1V5U3	A0A2H1V5U3	26	26	26			tr|A0A2H1V5U3|A0A2H1V5U3_SPOFR Eukaryotic translation initiation factor 3 subunit C OS=Spodoptera frugiperda OX=7108 GN=LOC118274724 PE=3 SV=1	1	26	26	26	26	26	26	33.2	33.2	33.2	101.8	882	882	0	66.124	33.2	634360000	634360000	14097000	14097000	35				59	52;67;230;261;262;451;758;764;1012;1035;1203;2757;2968;3730;3792;4203;4411;4496;4681;4905;5123;5208;5424;5687;5780;5906	True;True;True;True;True;True;True;True;True;True;True;True;True;True;True;True;True;True;True;True;True;True;True;True;True;True	54;69;234;265;266;458;767;773;1029;1052;1222;2794;3006;3780;3847;4272;4482;4568;4756;4985;5206;5291;5510;5776;5870;5999	64;82;303;340;341;572;573;949;955;1287;1312;1560;3479;3755;4760;4890;5398;5694;5806;6057;6341;6608;6717;6718;6990;7310;7421;7576	87;88;113;449;493;494;495;839;840;1423;1432;1433;1942;1978;2366;5318;5738;7254;7468;8171;8612;8787;9240;9241;9675;9676;9677;9678;10081;10254;10255;10678;11157;11300;11541;11542	87;113;449;493;495;840;1423;1433;1942;1978;2366;5318;5738;7254;7468;8171;8612;8787;9240;9678;10081;10255;10678;11157;11300;11541
A0A9R0E7T8;A0A2H1V6G3	A0A9R0E7T8;A0A2H1V6G3	9;9	9;9	9;9			tr|A0A9R0E7T8|A0A9R0E7T8_SPOFR Nuclear protein localization protein 4 homolog isoform X2 OS=Spodoptera frugiperda OX=7108 GN=LOC118264773 PE=3 SV=1;tr|A0A2H1V6G3|A0A2H1V6G3_SPOFR Nuclear protein localization protein 4 homolog isoform X1 OS=Spodoptera frugi	2	9	9	9	9	9	9	20.9	20.9	20.9	67.76	618	618;619	0	24.256	20.9	172360000	172360000	5745400	5745400	12				60	425;459;728;2177;3106;4493;5271;5367;5414	True;True;True;True;True;True;True;True;True	432;466;737;2204;3145;4565;5354;5451;5500	541;583;913;2749;3920;5803;6799;6924;6978	794;853;1366;4205;4206;5990;8783;8784;10393;10592;10593;10659	794;853;1366;4205;5990;8784;10393;10593;10659
A0A2H1V6R5;A0A9R0EBQ6;A0A9R0F4S9	A0A2H1V6R5;A0A9R0EBQ6;A0A9R0F4S9	17;15;15	17;15;15	17;15;15			tr|A0A2H1V6R5|A0A2H1V6R5_SPOFR SFRICE_003544 OS=Spodoptera frugiperda OX=7108 GN=LOC118265403 PE=3 SV=1;tr|A0A9R0EBQ6|A0A9R0EBQ6_SPOFR Uridine phosphorylase 1 isoform X3 OS=Spodoptera frugiperda OX=7108 GN=LOC118265403 PE=3 SV=1;tr|A0A9R0F4S9|A0A9R0F4S9_SP	3	17	17	17	17	17	17	64.6	64.6	64.6	44.04	393	393;337;339	0	323.31	64.6	1435700000	1435700000	71783000	71783000	37				61	72;1376;1632;1839;2354;2975;3377;3462;3495;3605;3689;4029;4091;4633;5124;5360;5965	True;True;True;True;True;True;True;True;True;True;True;True;True;True;True;True;True	74;1397;1653;1654;1864;2385;3013;3420;3507;3541;3654;3739;4091;4155;4708;5207;5443;6061	88;1780;1781;2085;2086;2331;2981;3763;3764;4301;4302;4392;4435;4436;4615;4714;5172;5241;5242;5998;5999;6609;6904;7648	119;2737;2738;2739;3174;3175;3176;3551;4583;5748;5749;6577;6578;6579;6580;6581;6703;6773;6774;7059;7060;7194;7195;7854;7956;7957;9146;9147;9148;9149;9150;10082;10541;10542;10543;11637;11638;11639	119;2739;3175;3551;4583;5749;6578;6703;6774;7059;7195;7854;7956;9148;10082;10542;11639	2	110
A0A9R0EG04;A0A2H1V6S3;A0A9R0CWN0;A0A5Q0TYX0	A0A9R0EG04;A0A2H1V6S3;A0A9R0CWN0;A0A5Q0TYX0	5;5;5;5	5;5;5;5	5;5;5;5			tr|A0A9R0EG04|A0A9R0EG04_SPOFR Heat shock protein 75 kDa, mitochondrial isoform X2 OS=Spodoptera frugiperda OX=7108 GN=LOC118263629 PE=3 SV=1;tr|A0A2H1V6S3|A0A2H1V6S3_SPOFR SFRICE000166.2 OS=Spodoptera frugiperda OX=7108 GN=SFRICE000166.2 PE=3 SV=1;tr|A0A9	4	5	5	5	5	5	5	7.4	7.4	7.4	80.488	707	707;707;709;709	0	4.5128	7.4	81666000	81666000	1899200	1899200	4				62	972;3248;3607;4590;5904	True;True;True;True;True	988;3290;3656;4665;5997	1241;4096;4617;5952;7574	1865;6239;7062;9084;11539	1865;6239;7062;9084;11539
A0A9R0DL61;A0A2H1V6T3	A0A9R0DL61;A0A2H1V6T3	5;5	5;5	5;5			tr|A0A9R0DL61|A0A9R0DL61_SPOFR Asparagine synthetase [glutamine-hydrolyzing] OS=Spodoptera frugiperda OX=7108 GN=LOC118282360 PE=4 SV=1;tr|A0A2H1V6T3|A0A2H1V6T3_SPOFR Asparagine synthetase [glutamine-hydrolyzing] OS=Spodoptera frugiperda OX=7108 GN=SFRICE_	2	5	5	5	5	5	5	12.3	12.3	12.3	62.778	552	552;557	0	10.593	12.3	89993000	89993000	3103200	3103200	6				63	717;896;4616;4644;4698	True;True;True;True;True	726;907;4691;4719;4773	899;1115;5979;6011;6081	1335;1663;9120;9169;9170;9269	1335;1663;9120;9170;9269
A0A2H1V7G6;A0A9R0EJL0;A0A9R0ETK0;A0A9R0EIY2;A0A9R0EJ19;A0A9R0D2L9;A0A9R0D2W6;A0A9R0EW37;A0A9R0D2P1	A0A2H1V7G6;A0A9R0EJL0;A0A9R0ETK0;A0A9R0EIY2;A0A9R0EJ19;A0A9R0D2L9;A0A9R0D2W6;A0A9R0EW37;A0A9R0D2P1	4;4;4;4;4;4;4;2;2	4;4;4;4;4;4;4;2;2	4;4;4;4;4;4;4;2;2			tr|A0A2H1V7G6|A0A2H1V7G6_SPOFR dual-specificity kinase (Fragment) OS=Spodoptera frugiperda OX=7108 GN=SFRICE_022557 PE=3 SV=1;tr|A0A9R0EJL0|A0A9R0EJL0_SPOFR dual-specificity kinase OS=Spodoptera frugiperda OX=7108 GN=LOC118267806 PE=3 SV=1;tr|A0A9R0ETK0|A0	9	4	4	4	4	4	4	12.8	12.8	12.8	50.16	439	439;444;446;466;469;469;472;433;436	0	6.4056	12.8	13626000	13626000	619350	619350	5				64	2014;3134;4939;5782	True;True;True;True	2040;3174;5019;5872	2537;3956;6386;7423	3844;6039;9758;9759;11302	3844;6039;9758;11302
A0A2H1V7V8;A0A9R0D729;A0A9R0D6Y5	A0A2H1V7V8;A0A9R0D729;A0A9R0D6Y5	14;14;14	14;14;14	14;14;14			tr|A0A2H1V7V8|A0A2H1V7V8_SPOFR Nucleosome assembly protein 1-like 1 isoform X3 OS=Spodoptera frugiperda OX=7108 GN=LOC118270957 PE=3 SV=1;tr|A0A9R0D729|A0A9R0D729_SPOFR Nucleosome assembly protein 1-like 1 isoform X2 OS=Spodoptera frugiperda OX=7108 GN=LOC	3	14	14	14	14	14	14	54.7	54.7	54.7	45.329	397	397;404;423	0	191.97	54.7	3046900000	3046900000	203130000	203130000	36				65	172;506;574;653;750;1086;1670;1705;1820;2372;2808;3894;4101;5659	True;True;True;True;True;True;True;True;True;True;True;True;True;True	176;513;582;661;759;1103;1693;1729;1845;2403;2845;3953;4165;4166;5747	230;231;637;718;817;818;940;1372;2129;2174;2175;2309;3003;3004;3546;3547;5009;5253;5254;5255;7269	339;340;943;1071;1216;1217;1218;1404;2061;2062;3240;3241;3242;3243;3300;3301;3515;4627;4628;4629;4630;5429;5430;5431;7634;7970;7971;7972;7973;7974;7975;7976;7977;7978;11075;11076	340;943;1071;1218;1404;2061;3240;3300;3515;4630;5429;7634;7976;11076	3	181
A0A2H1V837;A0A9R0EQM3;A0A9R0EPI2;A0A9R0F4S3	A0A2H1V837;A0A9R0EQM3;A0A9R0EPI2	6;6;6;1	6;6;6;1	6;6;6;1			tr|A0A2H1V837|A0A2H1V837_SPOFR Coatomer subunit beta OS=Spodoptera frugiperda OX=7108 GN=SFRICE_009262 PE=3 SV=1;tr|A0A9R0EQM3|A0A9R0EQM3_SPOFR Coatomer subunit beta OS=Spodoptera frugiperda OX=7108 GN=LOC118275640 PE=3 SV=1;tr|A0A9R0EPI2|A0A9R0EPI2_SPOF	4	6	6	6	6	6	6	11.8	11.8	11.8	97.87	871	871;949;952;636	0	21.835	11.8	78696000	78696000	1788500	1788500	8				66	3116;3963;4290;4343;4764;5431	True;True;True;True;True;True	3156;4022;4359;4414;4840;5518	3932;3933;5090;5091;5537;5614;6159;6998	6005;6006;7740;7741;8400;8503;9385;10688	6006;7740;8400;8503;9385;10688
A0A9R0DC88;A0A2H1V844;A0A9R0DCH5	A0A9R0DC88;A0A2H1V844;A0A9R0DCH5	6;6;3	6;6;3	6;6;3			tr|A0A9R0DC88|A0A9R0DC88_SPOFR SWI/SNF-related matrix-associated actin-dependent regulator of chromatin subfamily B member 1-A isoform X1 OS=Spodoptera frugiperda OX=7108 GN=LOC118274560 PE=3 SV=1;tr|A0A2H1V844|A0A2H1V844_SPOFR SFRICE_002974 OS=Spodoptera	3	6	6	6	6	6	6	14.9	14.9	14.9	45.744	402	402;400;372	0	9.5923	14.9	120640000	120640000	6349700	6349700	7				67	91;92;2920;2984;3161;4383	True;True;True;True;True;True	93;94;2957;3022;3202;4454	109;110;3697;3773;3988;3989;5658	148;149;5661;5762;6086;6087;8558	148;149;5661;5762;6086;8558
A0A9R0D8B9;A0A2H1V878	A0A9R0D8B9;A0A2H1V878	1;1	1;1	1;1			tr|A0A9R0D8B9|A0A9R0D8B9_SPOFR U3 small nucleolar RNA-associated protein 14 homolog A OS=Spodoptera frugiperda OX=7108 GN=LOC118271868 PE=3 SV=1;tr|A0A2H1V878|A0A2H1V878_SPOFR SFRICE_010656 OS=Spodoptera frugiperda OX=7108 GN=SFRICE_010656 PE=3 SV=1	2	1	1	1	1	1	1	1.1	1.1	1.1	81.587	709	709;709	0.0096685	1.2403	1.1	91103000	91103000	2938800	2938800	1				68	3350	TRUE	3393	4274	6544	6544
A0A9R0DU45;A0A9R0EWN0;A0A2H1V8B1	A0A9R0DU45;A0A9R0EWN0;A0A2H1V8B1	2;2;2	2;2;2	2;2;2			tr|A0A9R0DU45|A0A9R0DU45_SPOFR PHD finger protein 12-like isoform X2 OS=Spodoptera frugiperda OX=7108 GN=LOC118274674 PE=4 SV=1;tr|A0A9R0EWN0|A0A9R0EWN0_SPOFR PHD finger protein 12-like isoform X1 OS=Spodoptera frugiperda OX=7108 GN=LOC118274674 PE=4 SV=1;	3	2	2	2	2	2	2	2.7	2.7	2.7	85.785	785	785;786;786	0.005698	1.3769	2.7	23248000	23248000	664220	664220	2				69	1216;2990	True;True	1235;3028	1574;3781	2390;5778	2390;5778
A0A2H1V8C6	A0A2H1V8C6	31	31	31			tr|A0A2H1V8C6|A0A2H1V8C6_SPOFR Importin-5 OS=Spodoptera frugiperda OX=7108 GN=LOC118262844 PE=4 SV=1	1	31	31	31	31	31	31	42.8	42.8	42.8	123.41	1104	1104	0	121.37	42.8	653040000	653040000	11069000	11069000	37				70	220;284;571;1200;1422;1556;1628;1662;1918;2049;2223;2481;3293;3586;3703;3755;3927;4276;4332;4362;4436;4547;4932;5635;5652;5739;5744;5757;5897;5952;5973	True;True;True;True;True;True;True;True;True;True;True;True;True;True;True;True;True;True;True;True;True;True;True;True;True;True;True;True;True;True;True	224;288;579;1219;1443;1577;1649;1685;1943;2075;2076;2251;2514;3335;3635;3753;3806;3986;4345;4403;4433;4508;4620;5012;5723;5740;5829;5834;5847;5990;6048;6069	292;366;715;1556;1841;2002;2080;2121;2417;2580;2581;2817;3133;4162;4595;4729;4795;5046;5483;5600;5635;5725;5867;6376;7239;7262;7368;7375;7393;7394;7567;7634;7656	438;536;1068;2362;2826;3062;3169;3228;3676;3913;3914;3915;4334;4799;6338;7036;7212;7302;7681;8287;8486;8531;8532;8653;8873;8874;9741;9742;11034;11068;11235;11236;11244;11267;11268;11526;11621;11649	438;536;1068;2362;2826;3062;3169;3228;3676;3915;4334;4799;6338;7036;7212;7302;7681;8287;8486;8531;8653;8874;9742;11034;11068;11236;11244;11267;11526;11621;11649	4	390
A0A2H1V8F0	A0A2H1V8F0	1	1	1			tr|A0A2H1V8F0|A0A2H1V8F0_SPOFR GPN-loop GTPase 3 OS=Spodoptera frugiperda OX=7108 GN=LOC118274677 PE=3 SV=1	1	1	1	1	1	1	1	8.3	8.3	8.3	31.628	277	277	0.0014837	1.6795	8.3	1313000	1313000	119370	119370	1				71	2640	TRUE	2676	3339	5109	5109
A0A2H1V8G2;A0A9R0DSH7;A0A9R0DTS7;A0A9R0EYI7;A0A9R0EVN3;A0A9R0DT37;A0A9R0DCR1;A0A9R0EX49	A0A2H1V8G2;A0A9R0DSH7;A0A9R0DTS7;A0A9R0EYI7;A0A9R0EVN3;A0A9R0DT37;A0A9R0DCR1;A0A9R0EX49	3;3;3;3;3;3;3;3	3;3;3;3;3;3;3;3	3;3;3;3;3;3;3;3			tr|A0A2H1V8G2|A0A2H1V8G2_SPOFR SFRICE_006477 OS=Spodoptera frugiperda OX=7108 GN=SFRICE_006477 PE=4 SV=1;tr|A0A9R0DSH7|A0A9R0DSH7_SPOFR [histone H3]-lysine(4) N-trimethyltransferase OS=Spodoptera frugiperda OX=7108 GN=LOC118274518 PE=4 SV=1;tr|A0A9R0DTS7|A	8	3	3	3	3	3	3	5	5	5	108.72	962	962;1509;1521;1526;1531;1541;1541;1546	0	5.8838	5	13671000	13671000	297200	297200	3				72	3279;4122;5427	True;True;True	3321;4189;5514	4147;5281;6994	6318;8014;10683	6318;8014;10683
A0A2H1V8W8;A0A9R0EXM4;A0A2H1VBA2	A0A2H1V8W8;A0A9R0EXM4;A0A2H1VBA2	1;1;1	1;1;1	1;1;1			tr|A0A2H1V8W8|A0A2H1V8W8_SPOFR Galactose mutarotase (Fragment) OS=Spodoptera frugiperda OX=7108 GN=SFRICE_024724 PE=3 SV=1;tr|A0A9R0EXM4|A0A9R0EXM4_SPOFR Aldose 1-epimerase OS=Spodoptera frugiperda OX=7108 GN=LOC118271355 PE=3 SV=1;tr|A0A2H1VBA2|A0A2H1VBA2	3	1	1	1	1	1	1	2.8	2.8	2.8	34.979	320	320;363;1090	0.0015528	2.0364	2.8	4367900	4367900	311990	311990	2				73	2166	TRUE	2193	2735	4184;4185	4185
A0A2H1V9T2	A0A2H1V9T2	3	3	3			tr|A0A2H1V9T2|A0A2H1V9T2_SPOFR Exosome RNA helicase MTR4 OS=Spodoptera frugiperda OX=7108 GN=LOC126911517 PE=4 SV=1	1	3	3	3	3	3	3	4.8	4.8	4.8	116.39	1030	1030	0	2.447	4.8	8417900	8417900	158830	158830	2				74	3626;4800;5630	True;True;True	3675;4876;5718	4637;6201;7234	7092;9449;11028	7092;9449;11028
A0A2H1V9X0	A0A2H1V9X0	14	14	14			tr|A0A2H1V9X0|A0A2H1V9X0_SPOFR SUMO-activating enzyme subunit OS=Spodoptera frugiperda OX=7108 GN=LOC118272617 PE=3 SV=1	1	14	14	14	14	14	14	32	32	32	66.929	609	609	0	53.316	32	462960000	462960000	13227000	13227000	16				75	124;201;693;1718;1875;1934;2475;3532;4066;4524;4740;5086;5114;5288	True;True;True;True;True;True;True;True;True;True;True;True;True;True	127;205;702;1742;1900;1960;2508;3580;4130;4597;4815;5168;5196;5371	160;267;874;2191;2369;2445;3126;4482;5215;5841;6128;6568;6598;6817	225;401;1297;3324;3602;3716;4791;6835;7912;8840;8841;9328;9329;10022;10063;10415;10416	225;401;1297;3324;3602;3716;4791;6835;7912;8840;9328;10022;10063;10416
A0A2H1V9X2	A0A2H1V9X2	11	11	11			tr|A0A2H1V9X2|A0A2H1V9X2_SPOFR Integrin-linked protein kinase OS=Spodoptera frugiperda OX=7108 GN=LOC118272713 PE=4 SV=1	1	11	11	11	11	11	11	22.9	22.9	22.9	51.213	458	458	0	17.823	22.9	273850000	273850000	11410000	11410000	10				76	908;1109;1145;2129;2462;2497;3136;3137;4151;4480;5929	True;True;True;True;True;True;True;True;True;True;True	919;1126;1162;2156;2495;2531;3176;3177;4219;4552;6024	1129;1404;1449;2688;3110;3152;3958;3959;3960;5323;5787;7605	1684;2126;2199;4067;4771;4828;6044;6045;6046;8066;8761;11587	1684;2126;2199;4067;4771;4828;6044;6046;8066;8761;11587
A0A2H1V9X6;A0A9R0F6U4;A0A9R0EB74;A0A9R0EB77;A0A9R0ECH5;A0A9R0EBV3;A0A9R0ESV1;A0A9R0DK91;A0A9R0F5I6;A0A9R0DKN4;A0A2H1V9T4	A0A2H1V9X6;A0A9R0F6U4;A0A9R0EB74;A0A9R0EB77;A0A9R0ECH5;A0A9R0EBV3	7;6;6;6;6;6;1;1;1;1;1	6;5;5;5;5;5;1;1;1;1;1	6;5;5;5;5;5;1;1;1;1;1			tr|A0A2H1V9X6|A0A2H1V9X6_SPOFR Malic enzyme OS=Spodoptera frugiperda OX=7108 GN=SFRICE_002061 PE=3 SV=1;tr|A0A9R0F6U4|A0A9R0F6U4_SPOFR Malic enzyme OS=Spodoptera frugiperda OX=7108 GN=LOC118281602 PE=3 SV=1;tr|A0A9R0EB74|A0A9R0EB74_SPOFR Malic enzyme OS=Sp	11	7	6	6	7	6	6	6.3	5.3	5.3	137.29	1235	1235;618;628;630;677;687;499;611;621;635;636	0	8.4771	6.3	161570000	161570000	2524500	2524500	6				77	1799;1840;1849;2444;3934;4109;4177	True;True;True;True;True;True;False	1823;1865;1874;2477;3993;4176;4245	2284;2332;2342;3086;5055;5268;5361	3472;3552;3563;4737;4738;7693;8000;8124	3472;3552;3563;4738;7693;8000;8124
A0A9R0DLE7;A0A2H1V9Y4	A0A9R0DLE7;A0A2H1V9Y4	2;2	2;2	2;2			tr|A0A9R0DLE7|A0A9R0DLE7_SPOFR Mini-chromosome maintenance complex-binding protein OS=Spodoptera frugiperda OX=7108 GN=LOC126910638 PE=3 SV=1;tr|A0A2H1V9Y4|A0A2H1V9Y4_SPOFR Mini-chromosome maintenance complex-binding protein OS=Spodoptera frugiperda OX=710	2	2	2	2	2	2	2	5.3	5.3	5.3	69.389	604	604;604	0.0057225	1.4071	5.3	3792300	3792300	114920	114920	3				78	3131;3400	True;True	3171;3444	3953;4327	6034;6035;6617	6035;6617
A0A2H1VA22	A0A2H1VA22	18	18	15			tr|A0A2H1VA22|A0A2H1VA22_SPOFR 14-3-3 protein epsilon OS=Spodoptera frugiperda OX=7108 GN=LOC118274546 PE=3 SV=1	1	18	18	15	18	18	15	65.6	65.6	59.9	29.716	262	262	0	253.66	65.6	9207600000	9207600000	613840000	613840000	61				79	20;21;58;879;926;991;1292;2153;2409;2410;2707;2897;3979;4098;4579;5842;5911;5912	True;True;True;True;True;True;True;True;True;True;True;True;True;True;True;True;True;True	20;21;60;889;937;938;1008;1313;2180;2440;2441;2743;2934;4038;4162;4654;5934;5935;6004;6005	24;25;26;71;72;73;1092;1093;1150;1151;1262;1677;2720;2721;3047;3048;3049;3414;3672;5110;5249;5915;7496;7497;7581;7582;7583	32;33;34;35;36;98;99;100;101;102;103;104;1631;1632;1633;1634;1713;1714;1715;1716;1890;1891;2572;4147;4148;4149;4150;4151;4152;4153;4154;4155;4156;4157;4158;4159;4160;4161;4689;4690;4691;4692;4693;5221;5626;5627;5628;5629;5630;5631;7769;7964;7965;8960;11417;11418;11419;11550;11551;11552;11553	33;36;103;1631;1716;1891;2572;4158;4689;4693;5221;5628;7769;7964;8960;11418;11550;11552	5;6	23;224
A0A9R0EU01;A0A2H1VA26	A0A9R0EU01;A0A2H1VA26	1;1	1;1	1;1			tr|A0A9R0EU01|A0A9R0EU01_SPOFR N(6)-L-threonylcarbamoyladenine synthase OS=Spodoptera frugiperda OX=7108 GN=LOC126910641 PE=3 SV=1;tr|A0A2H1VA26|A0A2H1VA26_SPOFR N(6)-L-threonylcarbamoyladenine synthase OS=Spodoptera frugiperda OX=7108 GN=SFRICE_000889 PE=	2	1	1	1	1	1	1	3.9	3.9	3.9	36.868	334	334;334	0	3.019	3.9	0	0	0	0	1				80	5262	TRUE	5345	6789	10378	10378
A0A9R0DU84;A0A9R0EWI7;A0A2H1VAD9;A0A9R0DVP7	A0A9R0DU84;A0A9R0EWI7;A0A2H1VAD9;A0A9R0DVP7	18;18;18;18	18;18;18;18	18;18;18;18			tr|A0A9R0DU84|A0A9R0DU84_SPOFR Spectrin alpha chain isoform X4 OS=Spodoptera frugiperda OX=7108 GN=LOC118262349 PE=3 SV=1;tr|A0A9R0EWI7|A0A9R0EWI7_SPOFR Spectrin alpha chain isoform X3 OS=Spodoptera frugiperda OX=7108 GN=LOC118262349 PE=3 SV=1;tr|A0A2H1VAD	4	18	18	18	18	18	18	9	9	9	276.95	2426	2426;2434;2441;2449	0	30.015	9	213310000	213310000	1502200	1502200	22				81	56;302;348;698;820;1004;1158;2260;2553;2752;3163;3231;3419;4034;4732;4907;5696;5995	True;True;True;True;True;True;True;True;True;True;True;True;True;True;True;True;True;True	58;306;353;707;830;1021;1176;2289;2588;2789;3204;3273;3464;4096;4807;4987;5785;6091	69;385;441;880;1017;1275;1465;2866;3222;3471;3991;4077;4348;5177;6120;6343;6344;7320;7712	96;555;643;644;645;1303;1526;1920;2223;4423;4936;5308;6089;6210;6644;7859;9318;9319;9681;9682;11168;11759	96;555;643;1303;1526;1920;2223;4423;4936;5308;6089;6210;6644;7859;9319;9682;11168;11759
A0A9R0CZ51;A0A9R0E9U9;A0A2H1VAR9	A0A9R0CZ51;A0A9R0E9U9;A0A2H1VAR9	2;2;2	2;2;2	2;2;2			tr|A0A9R0CZ51|A0A9R0CZ51_SPOFR phosphoinositide 5-phosphatase OS=Spodoptera frugiperda OX=7108 GN=LOC118265613 PE=3 SV=1;tr|A0A9R0E9U9|A0A9R0E9U9_SPOFR phosphoinositide 5-phosphatase OS=Spodoptera frugiperda OX=7108 GN=LOC126910612 PE=3 SV=1;tr|A0A2H1VAR9|	3	2	2	2	2	2	2	2.3	2.3	2.3	92.134	821	821;1093;1991	0.0015674	2.196	2.3	466610	466610	11381	11381	2				82	3766;5155	True;True	3818;5238	4810;6645	7322;10129	7322;10129
A0A2H1VAV5	A0A2H1VAV5	10	10	10			tr|A0A2H1VAV5|A0A2H1VAV5_SPOFR La protein homolog OS=Spodoptera frugiperda OX=7108 GN=LOC118273541 PE=4 SV=1	1	10	10	10	10	10	10	37.9	37.9	37.9	44.548	380	380	0	71.213	37.9	158290000	158290000	8330900	8330900	12				83	1018;1302;1395;3413;4380;4394;4487;4867;4868;5520	True;True;True;True;True;True;True;True;True;True	1035;1323;1416;3458;4451;4465;4559;4946;4947;5607	1293;1692;1809;4342;5655;5674;5795;6294;6295;7107	1951;2598;2599;2781;2782;6635;8555;8580;8769;9593;9594;10855	1951;2598;2781;6635;8555;8580;8769;9593;9594;10855
A0A2H1VAY1	A0A2H1VAY1	1	1	1			tr|A0A2H1VAY1|A0A2H1VAY1_SPOFR H/ACA ribonucleoprotein complex subunit 2-like protein OS=Spodoptera frugiperda OX=7108 GN=LOC118270702 PE=3 SV=1	1	1	1	1	1	1	1	6.4	6.4	6.4	17.728	156	156	0.0095238	1.1566	6.4	0	0	0	0	1				84	796	TRUE	806	991	1488	1488
A0A2H1VBK4;A0A9R0D397	A0A2H1VBK4;A0A9R0D397	5;5	5;5	5;5			tr|A0A2H1VBK4|A0A2H1VBK4_SPOFR SFRICE_010415 (Fragment) OS=Spodoptera frugiperda OX=7108 GN=SFRICE_010415 PE=3 SV=1;tr|A0A9R0D397|A0A9R0D397_SPOFR Glycosyltransferase 25 family member OS=Spodoptera frugiperda OX=7108 GN=LOC118268338 PE=3 SV=1	2	5	5	5	5	5	5	15.7	15.7	15.7	60.333	515	515;566	0	14.856	15.7	21193000	21193000	784910	784910	5				85	1474;1957;4549;4645;5672	True;True;True;True;True	1495;1983;4622;4720;5761	1903;2474;5869;6012;7290	2938;3757;8877;9171;11113	2938;3757;8877;9171;11113
Q962Q6;A0A2H1VC29	Q962Q6;A0A2H1VC29	2;2	2;2	2;2			sp|Q962Q6|RS24_SPOFR Small ribosomal subunit protein eS24 OS=Spodoptera frugiperda OX=7108 GN=RpS24 PE=2 SV=1;tr|A0A2H1VC29|A0A2H1VC29_SPOFR 40S ribosomal protein S24 OS=Spodoptera frugiperda OX=7108 GN=LOC118264494 PE=3 SV=1	2	2	2	2	2	2	2	20.5	20.5	20.5	15.17	132	132;132	0	4.2484	20.5	2305300	2305300	461050	461050	3				86	4849;5710	True;True	4927;5799	6273;7337	9558;11197;11198	9558;11197
A0A9R0DKL7;A0A3S8NFU3;A0A2H1VC45	A0A9R0DKL7;A0A3S8NFU3;A0A2H1VC45	5;5;5	5;5;5	5;5;5			tr|A0A9R0DKL7|A0A9R0DKL7_SPOFR Vacuolar protein sorting-associated protein VTA1 homolog OS=Spodoptera frugiperda OX=7108 GN=LOC118282194 PE=3 SV=1;tr|A0A3S8NFU3|A0A3S8NFU3_SPOFR Vta1 OS=Spodoptera frugiperda OX=7108 GN=Vta1 PE=2 SV=1;tr|A0A2H1VC45|A0A2H1VC	3	5	5	5	5	5	5	18	18	18	35.366	322	322;322;322	0	7.3586	18	105540000	105540000	7538800	7538800	6				87	1248;2261;3129;3858;4660	True;True;True;True;True	1269;2290;3169;3917;4735	1624;2867;3951;4967;6029	2478;2479;4424;6031;7581;9196	2479;4424;6031;7581;9196
A0A2H1VC46;A0A9R0DT04;A0A9R0DSA2;A0A9R0DTJ9;A0A9R0EYF0;A0A9R0EVJ8	A0A2H1VC46;A0A9R0DT04;A0A9R0DSA2;A0A9R0DTJ9;A0A9R0EYF0;A0A9R0EVJ8	26;26;26;26;26;26	26;26;26;26;26;26	26;26;26;26;26;26			tr|A0A2H1VC46|A0A2H1VC46_SPOFR SFRICE_008240 (Fragment) OS=Spodoptera frugiperda OX=7108 GN=SFRICE_008240 PE=4 SV=1;tr|A0A9R0DT04|A0A9R0DT04_SPOFR Ataxin-2-like protein isoform X5 OS=Spodoptera frugiperda OX=7108 GN=LOC118275231 PE=3 SV=1;tr|A0A9R0DSA2|A0A	6	26	26	26	26	26	26	53.1	53.1	53.1	66.835	625	625;893;896;898;922;924	0	323.31	53.1	4970800000	4970800000	198830000	198830000	64				88	120;254;391;431;474;912;1082;1410;1567;1745;2310;2734;2800;3165;3887;4212;4242;4256;4471;4482;4527;4858;4921;5351;5923;6015	True;True;True;True;True;True;True;True;True;True;True;True;True;True;True;True;True;True;True;True;True;True;True;True;True;True	123;258;398;438;481;923;1099;1431;1588;1769;2340;2771;2837;3206;3946;4281;4311;4325;4543;4554;4600;4936;5001;5434;6017;6111	155;156;331;332;496;548;600;601;1134;1135;1367;1827;1828;2014;2221;2925;3450;3535;3536;3537;3994;3995;5000;5001;5407;5443;5444;5445;5461;5774;5789;5790;5844;6284;6361;6362;6363;6885;6886;7596;7597;7737	220;221;483;484;725;803;804;876;877;1691;1692;1693;2055;2804;2805;3077;3078;3079;3365;3366;3367;3368;4501;5272;5273;5274;5275;5418;5419;5420;6092;6093;6094;7624;7625;8181;8231;8232;8233;8234;8259;8741;8763;8764;8844;9571;9572;9573;9713;9714;9715;9716;9717;9718;9719;10514;10515;10516;11572;11573;11574;11575;11576;11577;11795	220;483;725;803;876;1693;2055;2805;3079;3367;4501;5272;5420;6094;7625;8181;8233;8259;8741;8764;8844;9571;9714;10515;11573;11795
A0A2H1VC79	A0A2H1VC79	9	9	9			tr|A0A2H1VC79|A0A2H1VC79_SPOFR SFRICE_003853 OS=Spodoptera frugiperda OX=7108 GN=LOC118261866 PE=3 SV=1	1	9	9	9	9	9	9	42.9	42.9	42.9	31.591	287	287	0	55.066	42.9	348010000	348010000	21750000	21750000	16				89	390;569;1024;1026;1296;2704;3681;5793;5851	True;True;True;True;True;True;True;True;True	397;577;1041;1043;1317;2740;3731;5883;5944	495;713;1299;1301;1686;3411;4704;7435;7506	720;721;722;723;724;1063;1064;1065;1066;1958;1960;2584;5216;7182;11317;11431	721;1065;1958;1960;2584;5216;7182;11317;11431
A0A2H1VCK2;A0A9R0CW71	A0A2H1VCK2;A0A9R0CW71	1;1	1;1	1;1			tr|A0A2H1VCK2|A0A2H1VCK2_SPOFR SFRICE_003574 (Fragment) OS=Spodoptera frugiperda OX=7108 GN=SFRICE_003574 PE=4 SV=1;tr|A0A9R0CW71|A0A9R0CW71_SPOFR Uncharacterized protein LOC118263452 OS=Spodoptera frugiperda OX=7108 GN=LOC118263452 PE=4 SV=1	2	1	1	1	1	1	1	5.7	5.7	5.7	20.896	194	194;759	0.0015361	1.9647	5.7	35881000	35881000	3588100	3588100	1				90	4403	TRUE	4474	5685	8596	8596
A0A9R0EG24;A0A2H1VCQ2	A0A9R0EG24;A0A2H1VCQ2	2;2	2;2	2;2			tr|A0A9R0EG24|A0A9R0EG24_SPOFR Transaldolase OS=Spodoptera frugiperda OX=7108 GN=LOC118263320 PE=3 SV=1;tr|A0A2H1VCQ2|A0A2H1VCQ2_SPOFR Transaldolase OS=Spodoptera frugiperda OX=7108 GN=SFRICE_003576 PE=3 SV=1	2	2	2	2	2	2	2	7.5	7.5	7.5	37.334	332	332;332	0	2.3429	7.5	50738000	50738000	3171100	3171100	2				91	3187;3286	True;True	3229;3328	4022;4154	6128;6325	6128;6325
A0A2H1VCR1	A0A2H1VCR1	10	10	10			tr|A0A2H1VCR1|A0A2H1VCR1_SPOFR SFRICE_002609 OS=Spodoptera frugiperda OX=7108 GN=LOC118265212 PE=3 SV=1	1	10	10	10	10	10	10	21.3	21.3	21.3	75.165	682	682	0	47.938	21.3	250120000	250120000	8337200	8337200	12				92	208;263;314;778;788;4155;4238;4636;4638;4958	True;True;True;True;True;True;True;True;True;True	212;267;318;787;797;4223;4307;4711;4713;5038	277;342;399;970;982;5329;5438;6003;6005;6411	415;496;575;1456;1471;8073;8226;9159;9160;9161;9163;9794	415;496;575;1456;1471;8073;8226;9160;9163;9794
A0A9R0ENB8;A0A2H1VCV7	A0A9R0ENB8;A0A2H1VCV7	3;3	3;3	3;3			tr|A0A9R0ENB8|A0A9R0ENB8_SPOFR Importin subunit beta-1 OS=Spodoptera frugiperda OX=7108 GN=LOC118273495 PE=3 SV=1;tr|A0A2H1VCV7|A0A2H1VCV7_SPOFR SFRICE_008262 OS=Spodoptera frugiperda OX=7108 GN=SFRICE_008262 PE=3 SV=1	2	3	3	3	3	3	3	5.6	5.6	5.6	98.153	885	885;946	0	3.1866	5.6	4339700	4339700	98630	98630	4				93	992;1685;4502	True;True;True	1009;1709;4575	1263;2149;5816	1892;3268;3269;8800	1892;3268;8800
Q962R1;A0A2H1VCW1	Q962R1;A0A2H1VCW1	3;3	3;3	3;3			sp|Q962R1|RS18_SPOFR Small ribosomal subunit protein uS13 OS=Spodoptera frugiperda OX=7108 GN=RpS18 PE=2 SV=1;tr|A0A2H1VCW1|A0A2H1VCW1_SPOFR Small ribosomal subunit protein uS13 OS=Spodoptera frugiperda OX=7108 GN=LOC118273494 PE=3 SV=1	2	3	3	3	3	3	3	17.1	17.1	17.1	17.741	152	152;152	0	4.1487	17.1	96207000	96207000	10690000	10690000	5				94	2511;2666;5585	True;True;True	2545;2702;5672	3169;3368;7182	4858;4859;5150;5151;10960	4859;5151;10960
A0A9R0DL17;A0A9R0DLS0;A0A2H1VCY3	A0A9R0DL17;A0A9R0DLS0;A0A2H1VCY3	1;1;1	1;1;1	1;1;1			tr|A0A9R0DL17|A0A9R0DL17_SPOFR Proteasome-associated protein ECM29 homolog isoform X2 OS=Spodoptera frugiperda OX=7108 GN=LOC118282409 PE=4 SV=1;tr|A0A9R0DLS0|A0A9R0DLS0_SPOFR Proteasome-associated protein ECM29 homolog isoform X1 OS=Spodoptera frugiperda	3	1	1	1	1	1	1	1.1	1.1	1.1	210.86	1890	1890;1891;1891	0.0015015	1.8161	1.1	1374900	1374900	12499	12499	1				95	1646	TRUE	1669	2102	3200	3200
A0A2H1VCY7	A0A2H1VCY7	15	15	15			tr|A0A2H1VCY7|A0A2H1VCY7_SPOFR Adenosylhomocysteinase OS=Spodoptera frugiperda OX=7108 GN=LOC118273496 PE=3 SV=1	1	15	15	15	15	15	15	38.8	38.8	38.8	47.366	430	430	0	86.443	38.8	3444500000	3444500000	202620000	202620000	30				96	1241;1322;1440;1584;1825;2176;2730;2776;2855;4156;4676;5332;5628;5856;5896	True;True;True;True;True;True;True;True;True;True;True;True;True;True;True	1262;1343;1461;1605;1850;2203;2766;2813;2892;4224;4751;5415;5716;5949;5989	1616;1715;1862;2032;2033;2314;2315;2748;3444;3445;3504;3505;3619;5330;6049;6050;6866;7232;7511;7512;7564;7565;7566	2459;2630;2858;2859;3099;3100;3523;3524;3525;4204;5264;5265;5377;5378;5547;8074;9224;9225;10485;11025;11026;11439;11440;11441;11520;11521;11522;11523;11524;11525	2459;2630;2858;3099;3525;4204;5264;5377;5547;8074;9224;10485;11026;11439;11523
A0A2H1VD14;A0A9R0DLM4;A0A9R0DLY3	A0A2H1VD14;A0A9R0DLM4;A0A9R0DLY3	11;11;11	11;11;11	11;11;11			tr|A0A2H1VD14|A0A2H1VD14_SPOFR Armadillo repeat-containing protein 8 OS=Spodoptera frugiperda OX=7108 GN=SFRICE_001261 PE=4 SV=1;tr|A0A9R0DLM4|A0A9R0DLM4_SPOFR Armadillo repeat-containing protein 8 OS=Spodoptera frugiperda OX=7108 GN=LOC118272730 PE=4 SV=1	3	11	11	11	11	11	11	21.2	21.2	21.2	70.656	655	655;655;680	0	15.723	21.2	66726000	66726000	1755900	1755900	12				97	383;477;2464;2891;3290;4060;4838;4893;4926;5061;5736	True;True;True;True;True;True;True;True;True;True;True	390;484;2497;2928;3332;4124;4916;4973;5006;5143;5826	485;605;3112;3665;4158;5209;6260;6327;6369;6539;7365	705;884;4773;5616;6329;7906;9540;9659;9660;9733;9987;11230;11231	705;884;4773;5616;6329;7906;9540;9660;9733;9987;11230
A0A2H1VD57;A0A9R0CX06	A0A2H1VD57;A0A9R0CX06	2;1	2;1	2;1			tr|A0A2H1VD57|A0A2H1VD57_SPOFR Elongator complex protein 4 OS=Spodoptera frugiperda OX=7108 GN=SFRICE_006460 PE=3 SV=1;tr|A0A9R0CX06|A0A9R0CX06_SPOFR Elongator complex protein 4 OS=Spodoptera frugiperda OX=7108 GN=LOC118263920 PE=3 SV=1	2	2	2	2	2	2	2	8.4	8.4	8.4	41.097	369	369;369	0	5.7089	8.4	9748000	9748000	573410	573410	5				98	2122;3475	True;True	2149;3521	2680;2681;4413	4057;4058;4059;4060;6741	4058;6741
A0A2H1VD71	A0A2H1VD71	10	10	10			tr|A0A2H1VD71|A0A2H1VD71_SPOFR Eukaryotic translation initiation factor 3 subunit M OS=Spodoptera frugiperda OX=7108 GN=LOC118263919 PE=3 SV=1	1	10	10	10	10	10	10	31.9	31.9	31.9	44.122	386	386	0	68.727	31.9	384800000	384800000	15392000	15392000	11				99	652;954;1083;1369;1814;1902;3260;3519;4699;4881	True;True;True;True;True;True;True;True;True;True	660;967;1100;1390;1838;1927;3302;3567;4774;4961	816;1182;1368;1773;2301;2399;4109;4468;6082;6312;6313	1215;1759;2056;2723;3507;3644;6252;6814;9270;9632;9633;9634	1215;1759;2056;2723;3507;3644;6252;6814;9270;9632
A0A9R0EAE4;A0A2H1VDU5;A0A5Q0TYW1;A0A9R0E939	A0A9R0EAE4;A0A2H1VDU5;A0A5Q0TYW1;A0A9R0E939	40;40;40;40	40;40;40;40	40;40;40;40			tr|A0A9R0EAE4|A0A9R0EAE4_SPOFR Heat shock 70 kDa protein 4L isoform X4 OS=Spodoptera frugiperda OX=7108 GN=LOC118263319 PE=3 SV=1;tr|A0A2H1VDU5|A0A2H1VDU5_SPOFR Heat shock 70 kDa protein 4L isoform X3 OS=Spodoptera frugiperda OX=7108 GN=SFRICE003577.2 PE=3	4	40	40	40	40	40	40	60.2	60.2	60.2	90.26	806	806;813;832;839	0	323.31	60.2	7420500000	7420500000	164900000	164900000	103				100	178;792;971;973;1084;1269;1312;1604;1702;1733;1979;2065;2074;2733;2953;3036;3207;3288;3326;3391;3463;3485;3857;3861;3862;3974;4042;4070;4195;4211;4217;4365;4366;4454;4805;5051;5507;5615;5626;5828	True;True;True;True;True;True;True;True;True;True;True;True;True;True;True;True;True;True;True;True;True;True;True;True;True;True;True;True;True;True;True;True;True;True;True;True;True;True;True;True	182;801;802;987;989;1101;1290;1333;1625;1726;1757;2005;2092;2101;2770;2991;3075;3249;3330;3368;3434;3435;3508;3531;3916;3920;3921;4033;4104;4134;4264;4280;4286;4436;4437;4526;4881;4882;5133;5594;5703;5714;5918	237;986;987;1240;1242;1369;1647;1704;2053;2171;2207;2208;2501;2598;2599;2611;2612;3449;3736;3834;3835;4049;4156;4204;4205;4206;4317;4318;4393;4394;4395;4424;4425;4966;4970;4971;4972;5105;5185;5219;5389;5406;5412;5638;5639;5640;5750;6206;6207;6527;6528;7094;7216;7217;7229;7230;7476;7477	349;350;351;352;1481;1482;1483;1484;1863;1864;1866;2057;2058;2513;2514;2515;2516;2612;2613;2614;2615;3125;3126;3295;3296;3346;3347;3796;3797;3936;3937;3957;3958;3959;5270;5271;5707;5855;5856;6164;6165;6166;6167;6168;6169;6327;6388;6389;6390;6391;6392;6393;6394;6395;6396;6397;6602;6603;6704;6705;6706;6707;6708;6709;6756;6757;7580;7584;7585;7586;7587;7588;7589;7763;7764;7868;7869;7916;7917;8156;815…	350;1482;1863;1866;2057;2515;2615;3125;3295;3347;3797;3937;3958;5270;5707;5856;6164;6327;6391;6603;6705;6757;7580;7585;7589;7763;7868;7917;8157;8180;8188;8535;8537;8697;9456;9962;10838;11003;11021;11396	7;8;9	241;295;309
A0A9R0DK36;A0A2H1VE01	A0A9R0DK36;A0A2H1VE01	7;7	7;7	7;7			tr|A0A9R0DK36|A0A9R0DK36_SPOFR Pre-mRNA-processing factor 40 homolog A OS=Spodoptera frugiperda OX=7108 GN=LOC118281591 PE=4 SV=1;tr|A0A2H1VE01|A0A2H1VE01_SPOFR SFRICE_011285 OS=Spodoptera frugiperda OX=7108 GN=SFRICE_011285 PE=4 SV=1	2	7	7	7	7	7	7	12.5	12.5	12.5	93.923	829	829;829	0	13.842	12.5	59390000	59390000	1696900	1696900	7				101	795;1600;2761;3882;4402;4532;4583	True;True;True;True;True;True;True	805;1621;2798;3941;4473;4605;4658	990;2049;3483;4993;5684;5851;5945	1487;3117;5322;7615;7616;8595;8851;9065	1487;3117;5322;7615;8595;8851;9065
A0A2H1VE10;A0A9R0DTE0;A0A9R0EXA3;A0A2H1WMN4	A0A2H1VE10;A0A9R0DTE0;A0A9R0EXA3	5;5;5;2	5;5;5;2	5;5;5;2			tr|A0A2H1VE10|A0A2H1VE10_SPOFR SFRICE_011663 (Fragment) OS=Spodoptera frugiperda OX=7108 GN=SFRICE_011663 PE=4 SV=1;tr|A0A9R0DTE0|A0A9R0DTE0_SPOFR Phagocyte signaling-impaired protein isoform X2 OS=Spodoptera frugiperda OX=7108 GN=LOC118274944 PE=3 SV=1;tr	4	5	5	5	5	5	5	20.7	20.7	20.7	37	329	329;841;917;281	0	5.4453	20.7	82117000	82117000	4105800	4105800	9				102	897;2374;3373;3494;5191	True;True;True;True;True	908;2405;3416;3540;5274	1116;3006;4297;4434;6694;6695;6696	1664;4632;6572;6573;6771;6772;10219;10220;10221	1664;4632;6573;6771;10220
A0A2H1VE55	A0A2H1VE55	4	4	4			tr|A0A2H1VE55|A0A2H1VE55_SPOFR Mitochondrial-processing peptidase subunit beta OS=Spodoptera frugiperda OX=7108 GN=LOC118271558 PE=3 SV=1	1	4	4	4	4	4	4	14.6	14.6	14.6	51.559	466	466	0	5.6275	14.6	62009000	62009000	2583700	2583700	3				103	1242;2274;4073;4441	True;True;True;True	1263;2303;4137;4513	1617;2882;5222;5730	2460;4441;7926;8658	2460;4441;7926;8658
A0A2H1VE87;A0A9R0CX53;A0A2H1WII0;A0A9R0ETG8	A0A2H1VE87;A0A9R0CX53	23;21;3;2	23;21;3;2	23;21;3;2			tr|A0A2H1VE87|A0A2H1VE87_SPOFR Elongation factor 1-alpha OS=Spodoptera frugiperda OX=7108 GN=LOC118264000 PE=3 SV=1;tr|A0A9R0CX53|A0A9R0CX53_SPOFR Elongation factor 1-alpha OS=Spodoptera frugiperda OX=7108 GN=LOC118264000 PE=3 SV=1	4	23	23	23	23	23	23	38.7	38.7	38.7	68.652	639	639;563;728;729	0	141.35	38.7	1309800000	1309800000	40931000	40931000	46				104	305;605;851;870;1619;1624;1677;1815;1920;1921;2098;2162;2739;2798;3208;3668;3669;4220;4752;4851;4852;5381;5673	True;True;True;True;True;True;True;True;True;True;True;True;True;True;True;True;True;True;True;True;True;True;True	309;613;861;880;1640;1645;1700;1839;1945;1946;2125;2189;2776;2835;3250;3717;3718;4289;4828;4929;4930;5465;5762	388;755;1058;1059;1060;1082;2069;2075;2138;2302;2303;2419;2420;2648;2649;2730;3455;3530;4050;4051;4052;4686;4687;4688;4689;5415;6145;6275;6276;6277;6278;6940;7291	560;561;562;1120;1582;1583;1584;1585;1586;1618;3154;3155;3156;3163;3254;3255;3508;3509;3678;3679;4013;4014;4015;4179;5284;5413;6170;6171;6172;6173;6174;6175;7163;7164;7165;7166;7167;8193;9361;9560;9561;9562;9563;9564;10612;11114	561;1120;1585;1618;3156;3163;3255;3509;3678;3679;4013;4179;5284;5413;6175;7164;7166;8193;9361;9561;9564;10612;11114
A0A9R0ESP7;A0A2H1VER5	A0A9R0ESP7;A0A2H1VER5	1;1	1;1	1;1			tr|A0A9R0ESP7|A0A9R0ESP7_SPOFR Ferritin OS=Spodoptera frugiperda OX=7108 GN=LOC118278734 PE=3 SV=1;tr|A0A2H1VER5|A0A2H1VER5_SPOFR Ferritin OS=Spodoptera frugiperda OX=7108 GN=SFRICE_006535 PE=3 SV=1	2	1	1	1	1	1	1	5.7	5.7	5.7	23.778	211	211;306	0.0029028	1.5324	5.7	12830000	12830000	1425600	1425600	1				105	2101	TRUE	2128	2653	4019	4019
A0A9R0E3A6;A0A9R0E4W5;A0A2H1VER9;A0A9R0E4X3;A0A9R0F313;A0A9R0F1K7;A0A9R0E470;A0A9R0E3A9	A0A9R0E3A6;A0A9R0E4W5;A0A2H1VER9;A0A9R0E4X3;A0A9R0F313;A0A9R0F1K7;A0A9R0E470;A0A9R0E3A9	17;17;17;17;17;17;17;17	17;17;17;17;17;17;17;17	17;17;17;17;17;17;17;17			tr|A0A9R0E3A6|A0A9R0E3A6_SPOFR Paired amphipathic helix protein Sin3b isoform X7 OS=Spodoptera frugiperda OX=7108 GN=LOC118279619 PE=4 SV=1;tr|A0A9R0E4W5|A0A9R0E4W5_SPOFR Paired amphipathic helix protein Sin3b isoform X6 OS=Spodoptera frugiperda OX=7108 GN	8	17	17	17	17	17	17	18.4	18.4	18.4	152.41	1380	1380;1381;1381;1382;1385;1385;1385;1386	0	74.133	18.4	266600000	266600000	4165700	4165700	25				106	422;931;974;1535;1573;1805;2211;2946;2967;3043;3212;3465;3490;4353;4690;4697;5980	True;True;True;True;True;True;True;True;True;True;True;True;True;True;True;True;True	429;943;990;1556;1594;1829;2239;2983;3005;3082;3254;3510;3536;4424;4765;4772;6076	537;538;1156;1243;1973;2020;2290;2795;2796;2797;3728;3754;3844;4056;4398;4430;5625;6067;6080;7665	790;791;1723;1867;3026;3085;3490;4283;4284;4285;4286;4287;4288;4289;5698;5737;5867;6180;6712;6713;6763;8516;9252;9268;11663	791;1723;1867;3026;3085;3490;4285;5698;5737;5867;6180;6713;6763;8516;9252;9268;11663
A0A2H1VF18;A0A9R0D5P7;A0A9R0D5J4;A0A9R0D5V6;A0A9R0EL90;A0A9R0EKE2	A0A2H1VF18;A0A9R0D5P7;A0A9R0D5J4;A0A9R0D5V6;A0A9R0EL90;A0A9R0EKE2	1;1;1;1;1;1	1;1;1;1;1;1	1;1;1;1;1;1			tr|A0A2H1VF18|A0A2H1VF18_SPOFR SFRICE_017562 OS=Spodoptera frugiperda OX=7108 GN=SFRICE_017562 PE=4 SV=1;tr|A0A9R0D5P7|A0A9R0D5P7_SPOFR RNA-binding protein squid isoform X5 OS=Spodoptera frugiperda OX=7108 GN=LOC118269745 PE=4 SV=1;tr|A0A9R0D5J4|A0A9R0D5J4	6	1	1	1	1	1	1	4.5	4.5	4.5	30.675	286	286;303;304;308;325;329	0.0014599	1.5932	4.5	0	0	0	0	1				107	3069	TRUE	3108	3876	5914	5914
A0A2H1VF43	A0A2H1VF43	1	1	1			tr|A0A2H1VF43|A0A2H1VF43_SPOFR SFRICE_021632 OS=Spodoptera frugiperda OX=7108 GN=LOC118276275 PE=4 SV=1	1	1	1	1	1	1	1	12.7	12.7	12.7	12.194	118	118	0	4.2685	12.7	44057000	44057000	8811500	8811500	1				108	5276	TRUE	5359	6804	10399	10399
A0A2H1VF90	A0A2H1VF90	6	6	6			tr|A0A2H1VF90|A0A2H1VF90_SPOFR Eukaryotic translation initiation factor 3 subunit K OS=Spodoptera frugiperda OX=7108 GN=LOC118281570 PE=3 SV=1	1	6	6	6	6	6	6	35.5	35.5	35.5	24.817	214	214	0	10.217	35.5	98909000	98909000	6594000	6594000	6				109	353;737;2300;4013;5440;6011	True;True;True;True;True;True	358;746;2330;4075;5527;6107	447;924;2914;5156;7009;7733	652;1383;4484;7832;10701;11789;11790	652;1383;4484;7832;10701;11789
A0A2H1VFC7	A0A2H1VFC7	9	9	9			tr|A0A2H1VFC7|A0A2H1VFC7_SPOFR Eukaryotic translation initiation factor 3 subunit D OS=Spodoptera frugiperda OX=7108 GN=LOC118264749 PE=3 SV=1	1	9	9	9	9	9	9	26.4	26.4	26.4	62.937	553	553	0	85.514	26.4	432520000	432520000	16636000	16636000	14				110	718;1630;2323;2568;3962;4569;5147;5908;5931	True;True;True;True;True;True;True;True;True	727;1651;2354;2603;4021;4644;5230;6001;6026	900;2082;2083;2942;2943;3241;5088;5089;5905;6635;7578;7607	1336;1337;3171;3172;4523;4524;4959;7738;7739;8948;10119;11544;11545;11546;11547;11589	1336;3172;4524;4959;7739;8948;10119;11546;11589
A0A9R0EE91;A0A2H1VFD7	A0A9R0EE91;A0A2H1VFD7	2;2	2;2	2;2			tr|A0A9R0EE91|A0A9R0EE91_SPOFR Protein farnesyltransferase/geranylgeranyltransferase type-1 subunit alpha OS=Spodoptera frugiperda OX=7108 GN=LOC126912896 PE=3 SV=1;tr|A0A2H1VFD7|A0A2H1VFD7_SPOFR Protein farnesyltransferase/geranylgeranyltransferase type-1	2	2	2	2	2	2	2	6.9	6.9	6.9	39.126	332	332;332	0	4.2396	6.9	1725800	1725800	75033	75033	2				111	1232;1636	True;True	1251;1658	1595;2091	2417;3184	2417;3184
A0A2H1VFH3;A0A9R0EWA2;A0A7M3UPG5	A0A2H1VFH3;A0A9R0EWA2;A0A7M3UPG5	19;19;13	19;19;13	19;19;13			tr|A0A2H1VFH3|A0A2H1VFH3_SPOFR SFRICE_015684 (Fragment) OS=Spodoptera frugiperda OX=7108 GN=SFRICE_015684 PE=4 SV=1;tr|A0A9R0EWA2|A0A9R0EWA2_SPOFR Trithorax group protein osa OS=Spodoptera frugiperda OX=7108 GN=LOC118273576 PE=4 SV=1;tr|A0A7M3UPG5|A0A7M3UP	3	19	19	19	19	19	19	17	17	17	163.06	1537	1537;1373;513	0	104.74	17	773730000	773730000	14068000	14068000	30				112	629;1037;1180;1220;1588;1990;2452;2614;2814;2966;3864;4264;4360;4443;4647;4967;5269;5975;5976	True;True;True;True;True;True;True;True;True;True;True;True;True;True;True;True;True;True;True	637;1054;1198;1239;1609;2016;2485;2649;2851;3004;3923;4333;4431;4515;4722;5047;5352;6071;6072	791;1314;1529;1530;1579;2037;2513;3097;3098;3300;3558;3753;4974;5470;5632;5732;5733;5734;5735;6014;6423;6796;7659;7660	1182;1983;2321;2322;2323;2396;3104;3105;3810;4755;4756;4757;4758;5052;5053;5449;5450;5451;5736;7591;8271;8527;8660;8661;8662;8663;9173;9807;10389;11652;11653;11654	1182;1983;2321;2396;3104;3810;4757;5053;5451;5736;7591;8271;8527;8663;9173;9807;10389;11652;11653
A0A2H1VFQ1	A0A2H1VFQ1	6	6	6			tr|A0A2H1VFQ1|A0A2H1VFQ1_SPOFR Integrator complex subunit 11 OS=Spodoptera frugiperda OX=7108 GN=LOC118267637 PE=3 SV=1	1	6	6	6	6	6	6	11.8	11.8	11.8	67.579	595	595	0	13.633	11.8	59008000	59008000	2034800	2034800	7				113	214;2152;2607;3497;4093;5535	True;True;True;True;True;True	218;2179;2642;3543;4157;5622	284;2719;3292;4438;4439;5244;7124	427;4146;5042;6776;6777;6778;7959;10880	427;4146;5042;6777;7959;10880
A0A9R0DQG3;A0A2H1VG04	A0A9R0DQG3;A0A2H1VG04	1;1	1;1	1;1			tr|A0A9R0DQG3|A0A9R0DQG3_SPOFR RNA helicase OS=Spodoptera frugiperda OX=7108 GN=LOC118275766 PE=3 SV=1;tr|A0A2H1VG04|A0A2H1VG04_SPOFR RNA helicase OS=Spodoptera frugiperda OX=7108 GN=SFRICE_007331 PE=3 SV=1	2	1	1	1	1	1	1	2.5	2.5	2.5	101.1	887	887;887	0.0015649	2.1425	2.5	3320700	3320700	66413	66413	1				114	1367	TRUE	1388	1771	2718	2718
A0A2H1VG61	A0A2H1VG61	10	10	10			tr|A0A2H1VG61|A0A2H1VG61_SPOFR cystathionine gamma-lyase OS=Spodoptera frugiperda OX=7108 GN=LOC118272150 PE=3 SV=1	1	10	10	10	10	10	10	42.1	42.1	42.1	43.014	394	394	0	116.47	42.1	465540000	465540000	22168000	22168000	18				115	1554;3525;3713;3768;4064;4286;4354;4372;5398;5729	True;True;True;True;True;True;True;True;True;True	1575;3573;3763;3820;4128;4355;4425;4443;5484;5819	1999;2000;4474;4740;4812;5213;5494;5495;5626;5646;5647;6961;7358	3057;3058;3059;6825;7226;7227;7324;7910;8301;8302;8303;8517;8545;8546;10638;10639;10640;11222	3057;6825;7227;7324;7910;8302;8517;8545;10639;11222
A0A2H1VGR6	A0A2H1VGR6	2	1	1			tr|A0A2H1VGR6|A0A2H1VGR6_SPOFR Methionyl-tRNA synthetase OS=Spodoptera frugiperda OX=7108 GN=SFRICE_013602 PE=4 SV=1	1	2	1	1	2	1	1	4.1	2.5	2.5	62.553	561	561	0	3.2294	4.1	35283000	35283000	928500	928500	1				116	441;594	True;False	448;602	559;741	818;1100;1101	818;1100
A0A9R0D4I8;A0A9R0D4C4;A0A2H1VGS2	A0A9R0D4I8;A0A9R0D4C4;A0A2H1VGS2	8;8;8	8;8;8	8;8;8			tr|A0A9R0D4I8|A0A9R0D4I8_SPOFR Complement component 1 Q subcomponent-binding protein, mitochondrial isoform X2 OS=Spodoptera frugiperda OX=7108 GN=LOC118269064 PE=3 SV=1;tr|A0A9R0D4C4|A0A9R0D4C4_SPOFR Complement component 1 Q subcomponent-binding protein,	3	8	8	8	8	8	8	40.7	40.7	40.7	30.546	275	275;291;291	0	65.037	40.7	410650000	410650000	31588000	31588000	13				117	1225;1827;2597;2598;3247;3478;4817;5550	True;True;True;True;True;True;True;True	1244;1852;2632;2633;3289;3524;4894;5637	1585;2317;3279;3280;3281;4095;4417;6236;7142;7143	2403;2404;2405;3528;5024;5025;5026;5027;6238;6747;9501;10907;10908	2404;3528;5024;5027;6238;6747;9501;10907
A0A2H1VGU3	A0A2H1VGU3	3	3	3			tr|A0A2H1VGU3|A0A2H1VGU3_SPOFR COP9 signalosome complex subunit 3 OS=Spodoptera frugiperda OX=7108 GN=LOC118263240 PE=3 SV=1	1	3	3	3	3	3	3	12.6	12.6	12.6	47.678	422	422	0	4.2137	12.6	6764700	6764700	307490	307490	3				118	494;663;4000	True;True;True	501;671;4059	623;831;5136	914;1236;7804	914;1236;7804
A0A2H1VGV3;A0A9R0EU95	A0A2H1VGV3;A0A9R0EU95	25;24	25;24	25;24			tr|A0A2H1VGV3|A0A2H1VGV3_SPOFR SFRICE_008873 OS=Spodoptera frugiperda OX=7108 GN=SFRICE_008873 PE=4 SV=1;tr|A0A9R0EU95|A0A9R0EU95_SPOFR Uncharacterized protein C05D11.1-like OS=Spodoptera frugiperda OX=7108 GN=LOC118273517 PE=4 SV=1	2	25	25	25	25	25	25	33	33	33	112.68	1001	1001;1001	0	87.269	33	599860000	599860000	11762000	11762000	36				119	241;381;482;526;632;1042;1196;1249;1316;1434;1818;1914;2309;2828;2909;3167;3185;3773;3777;4606;4618;4651;5607;5812;5918	True;True;True;True;True;True;True;True;True;True;True;True;True;True;True;True;True;True;True;True;True;True;True;True;True	245;388;489;533;640;1059;1215;1270;1337;1455;1843;1939;2339;2865;2946;3208;3227;3827;3831;4681;4693;4726;5695;5902;6012	317;483;611;663;794;1321;1322;1551;1552;1625;1708;1709;1853;2307;2412;2924;3581;3582;3583;3685;3997;4020;4866;4871;5969;5981;6018;6019;7207;7458;7591	467;703;892;984;985;986;1185;1992;1993;2355;2356;2357;2480;2620;2621;2622;2839;3513;3669;4500;5492;5493;5494;5647;6096;6125;7437;7442;9109;9123;9177;9178;9179;9180;10993;11369;11566	467;703;892;985;1185;1992;2356;2480;2622;2839;3513;3669;4500;5493;5647;6096;6125;7437;7442;9109;9123;9178;10993;11369;11566
A0A5Q0TZ57;A0A2H1VGX5	A0A5Q0TZ57;A0A2H1VGX5	14;14	14;14	14;14			tr|A0A5Q0TZ57|A0A5Q0TZ57_SPOFR Hsp90 chaperone protein kinase-targeting subunit OS=Spodoptera frugiperda OX=7108 GN=LOC118278291 PE=2 SV=1;tr|A0A2H1VGX5|A0A2H1VGX5_SPOFR Hsp90 chaperone protein kinase-targeting subunit OS=Spodoptera frugiperda OX=7108 GN=S	2	14	14	14	14	14	14	41	41	41	44.206	378	378;378	0	75.606	41	905850000	905850000	53285000	53285000	30				120	260;635;686;914;2569;2765;3111;3786;4153;4295;4370;5177;5231;5263	True;True;True;True;True;True;True;True;True;True;True;True;True;True	264;643;695;925;2604;2802;3151;3841;4221;4364;4441;5260;5314;5346	339;798;861;1137;3242;3243;3487;3926;4883;5326;5327;5542;5644;6670;6749;6790	492;1190;1191;1283;1696;1697;4960;4961;4962;5326;5997;5998;5999;7460;7461;8069;8070;8071;8405;8541;10161;10300;10301;10302;10303;10304;10305;10306;10307;10379	492;1191;1283;1697;4962;5326;5999;7460;8071;8405;8541;10161;10301;10379
A0A2H1VH31;A0A9R0CW19	A0A2H1VH31;A0A9R0CW19	16;15	16;15	16;15			tr|A0A2H1VH31|A0A2H1VH31_SPOFR Eukaryotic translation initiation factor 5B OS=Spodoptera frugiperda OX=7108 GN=SFRICE_000005 PE=3 SV=1;tr|A0A9R0CW19|A0A9R0CW19_SPOFR Eukaryotic translation initiation factor 5B OS=Spodoptera frugiperda OX=7108 GN=LOC1182633	2	16	16	16	16	16	16	17.4	17.4	17.4	132.49	1180	1180;1181	0	53.789	17.4	197780000	197780000	3803500	3803500	16				121	76;1020;2007;2314;2746;2760;3387;3575;3628;3800;3801;4673;4711;5042;5043;5268	True;True;True;True;True;True;True;True;True;True;True;True;True;True;True;True	78;1037;2033;2344;2783;2797;3430;3623;3677;3855;3856;4748;4786;5124;5125;5351	93;1295;2530;2930;3463;3482;4313;4531;4639;4899;4900;6044;6095;6518;6519;6795	127;1953;3833;4507;5296;5297;5321;6596;6597;6901;7095;7479;7480;9216;9285;9952;9953;10387;10388	127;1953;3833;4507;5296;5321;6597;6901;7095;7479;7480;9216;9285;9952;9953;10388
A0A2H1VH44;A0A9R0F3U5;A0A9R0F2L4;A0A9R0E6B0	A0A2H1VH44;A0A9R0F3U5;A0A9R0F2L4;A0A9R0E6B0	1;1;1;1	1;1;1;1	1;1;1;1			tr|A0A2H1VH44|A0A2H1VH44_SPOFR T-complex protein 1 subunit eta OS=Spodoptera frugiperda OX=7108 GN=SFRICE_005225 PE=3 SV=1;tr|A0A9R0F3U5|A0A9R0F3U5_SPOFR T-complex protein 1 subunit eta OS=Spodoptera frugiperda OX=7108 GN=LOC118278805 PE=3 SV=1;tr|A0A9R0F2	4	1	1	1	1	1	1	2.7	2.7	2.7	56.596	524	524;544;546;553	0	2.9459	2.7	5453200	5453200	165250	165250	1				122	3390	TRUE	3433	4316	6601	6601
A0A9R0D1R3;A0A2H1VH60	A0A9R0D1R3;A0A2H1VH60	19;19	19;19	19;19			tr|A0A9R0D1R3|A0A9R0D1R3_SPOFR Vigilin OS=Spodoptera frugiperda OX=7108 GN=LOC118267302 PE=4 SV=1;tr|A0A2H1VH60|A0A2H1VH60_SPOFR SFRICE_000483 OS=Spodoptera frugiperda OX=7108 GN=SFRICE_000483 PE=4 SV=1	2	19	19	19	19	19	19	17.3	17.3	17.3	141.11	1268	1268;1268	0	48.307	17.3	253830000	253830000	3626100	3626100	26				123	465;783;1129;1265;1911;2197;2275;2303;2494;2600;2679;3204;4349;4950;5429;5442;5443;5537;5700	True;True;True;True;True;True;True;True;True;True;True;True;True;True;True;True;True;True;True	472;792;1146;1286;1936;2225;2304;2333;2528;2635;2715;3246;4420;5030;5516;5529;5530;5624;5789	589;976;1430;1643;2409;2777;2883;2918;3149;3283;3383;4044;5620;6399;6996;7012;7013;7014;7127;7326	859;1464;2176;2508;3664;3665;4253;4442;4490;4491;4492;4493;4825;5030;5175;6157;8511;9774;10685;10705;10706;10707;10708;10709;10883;11178;11179	859;1464;2176;2508;3665;4253;4442;4492;4825;5030;5175;6157;8511;9774;10685;10708;10709;10883;11178
A0A2H1VH62	A0A2H1VH62	10	10	10			tr|A0A2H1VH62|A0A2H1VH62_SPOFR Serine/threonine-protein phosphatase OS=Spodoptera frugiperda OX=7108 GN=LOC118266839 PE=3 SV=1	1	10	10	10	10	10	10	23.8	23.8	23.8	55.93	495	495	0	26.533	23.8	399290000	399290000	14260000	14260000	20				124	1521;1845;1871;2402;2611;3850;3863;4014;5859;5925	True;True;True;True;True;True;True;True;True;True	1542;1870;1896;2433;2646;3909;3922;4076;5952;6020	1956;2337;2365;3039;3297;4959;4973;5157;7515;7600	3006;3557;3594;3595;3596;3597;3598;4679;5049;7566;7567;7568;7569;7570;7571;7572;7573;7590;7833;11444;11582	3006;3557;3595;4679;5049;7572;7590;7833;11444;11582
A0A2H1VH86;A0A9R0EXH0	A0A2H1VH86;A0A9R0EXH0	2;2	2;2	2;2			tr|A0A2H1VH86|A0A2H1VH86_SPOFR SFRICE_005345 OS=Spodoptera frugiperda OX=7108 GN=SFRICE_005345 PE=4 SV=1;tr|A0A9R0EXH0|A0A9R0EXH0_SPOFR Protein nessun dorma OS=Spodoptera frugiperda OX=7108 GN=LOC118281720 PE=4 SV=1	2	2	2	2	2	2	2	4.8	4.8	4.8	50.846	459	459;509	0	4.4759	4.8	7432700	7432700	337850	337850	3				125	2355;4548	True;True	2386;4621	2982;5868	4584;8875;8876	4584;8875
A0A9R0F6U0;A0A9R0EDU0;A0A9R0F5R4;A0A9R0ECZ1;A0A9R0F6Z3;A0A9R0EKF7;A0A9R0EBN8;A0A9R0EBN9;A0A9R0ECZ4;A0A9R0ED38;A0A2H1VHB1	A0A9R0F6U0;A0A9R0EDU0;A0A9R0F5R4;A0A9R0ECZ1;A0A9R0F6Z3;A0A9R0EKF7;A0A9R0EBN8;A0A9R0EBN9;A0A9R0ECZ4;A0A9R0ED38;A0A2H1VHB1	1;1;1;1;1;1;1;1;1;1;1	1;1;1;1;1;1;1;1;1;1;1	1;1;1;1;1;1;1;1;1;1;1			tr|A0A9R0F6U0|A0A9R0F6U0_SPOFR Serine/threonine-protein kinase Doa isoform X10 OS=Spodoptera frugiperda OX=7108 GN=LOC118269551 PE=3 SV=1;tr|A0A9R0EDU0|A0A9R0EDU0_SPOFR Serine/threonine-protein kinase Doa isoform X9 OS=Spodoptera frugiperda OX=7108 GN=LOC1	11	1	1	1	1	1	1	1.6	1.6	1.6	59.669	511	511;529;568;766;827;827;838;993;1003;1014;1791	0.0097222	1.2649	1.6	1963100	1963100	85354	85354	2				126	4299	TRUE	4368	5546;5547	8409;8410	8410
A0A2H1VHH7	A0A2H1VHH7	5	5	5			tr|A0A2H1VHH7|A0A2H1VHH7_SPOFR T-complex protein 1 subunit theta OS=Spodoptera frugiperda OX=7108 GN=LOC118276309 PE=3 SV=1	1	5	5	5	5	5	5	13.2	13.2	13.2	58.958	545	545	0	8.8709	13.2	119500000	119500000	3229800	3229800	7				127	216;1365;1425;1551;5237	True;True;True;True;True	220;1386;1446;1572;5320	286;1769;1844;1995;6756	429;2713;2714;2829;3051;10314;10315	429;2713;2829;3051;10315
A0A9R0DEN1;A0A2H1VHL5;A0A9R0DEM9	A0A9R0DEN1;A0A2H1VHL5	13;13;4	13;13;4	13;13;4			tr|A0A9R0DEN1|A0A9R0DEN1_SPOFR protein-synthesizing GTPase OS=Spodoptera frugiperda OX=7108 GN=LOC118276213 PE=4 SV=1;tr|A0A2H1VHL5|A0A2H1VHL5_SPOFR protein-synthesizing GTPase OS=Spodoptera frugiperda OX=7108 GN=SFRICE_001666 PE=4 SV=1	3	13	13	13	13	13	13	40	40	40	50.527	468	468;872;593	0	46.939	40	482640000	482640000	21938000	21938000	16				128	242;1286;1651;2128;2254;2662;3175;3473;3577;4205;4528;4582;5953	True;True;True;True;True;True;True;True;True;True;True;True;True	246;1307;1674;2155;2283;2698;3216;3519;3625;4274;4601;4657;6049	318;1671;2107;2687;2859;3364;4008;4411;4533;5400;5845;5846;5943;5944;7635	468;2561;3205;4066;4414;5144;5145;6112;6738;6739;6903;8174;8845;8846;9063;9064;11622	468;2561;3205;4066;4414;5144;6112;6738;6903;8174;8846;9063;11622
A0A9R0DEM0;A0A2H1VHL8	A0A9R0DEM0;A0A2H1VHL8	5;5	5;5	5;5			tr|A0A9R0DEM0|A0A9R0DEM0_SPOFR Cullin-5 OS=Spodoptera frugiperda OX=7108 GN=LOC118276212 PE=3 SV=1;tr|A0A2H1VHL8|A0A2H1VHL8_SPOFR Cullin-5 OS=Spodoptera frugiperda OX=7108 GN=SFRICE_001665 PE=3 SV=1	2	5	5	5	5	5	5	8.5	8.5	8.5	90.321	779	779;784	0	10.23	8.5	38714000	38714000	823710	823710	8				129	1370;2605;3019;4296;5533	True;True;True;True;True	1391;2640;3057;4365;5620	1774;3289;3815;5543;7122	2724;5039;5826;8406;10874;10875;10876;10877	2724;5039;5826;8406;10876
A0A2H1VI28;A0A9R0E1T7	A0A2H1VI28;A0A9R0E1T7	1;1	1;1	1;1			tr|A0A2H1VI28|A0A2H1VI28_SPOFR Methionine aminopeptidase (Fragment) OS=Spodoptera frugiperda OX=7108 GN=SFRICE_002668 PE=3 SV=1;tr|A0A9R0E1T7|A0A9R0E1T7_SPOFR Methionine aminopeptidase 2 OS=Spodoptera frugiperda OX=7108 GN=LOC126911968 PE=3 SV=1	2	1	1	1	1	1	1	3.3	3.3	3.3	33.571	300	300;470	0.0015083	1.8444	3.3	5985300	5985300	352070	352070	1				130	3904	TRUE	3963	5023	7648	7648
Q95V31;A0A9R0D7D5;A0A2H1VI47	Q95V31;A0A9R0D7D5;A0A2H1VI47	4;4;4	4;4;4	4;4;4			sp|Q95V31|RS16_SPOFR Small ribosomal subunit protein uS9 OS=Spodoptera frugiperda OX=7108 GN=RpS16 PE=2 SV=1;tr|A0A9R0D7D5|A0A9R0D7D5_SPOFR 40S ribosomal protein S16 OS=Spodoptera frugiperda OX=7108 GN=LOC118271317 PE=3 SV=1;tr|A0A2H1VI47|A0A2H1VI47_SPOFR	3	4	4	4	4	4	4	25.2	25.2	25.2	17.01	151	151;151;158	0	5.0042	25.2	56012000	56012000	4667700	4667700	4				131	304;3434;4714;5612	True;True;True;True	308;3479;4789;5700	387;4364;6098;7212	559;6664;9289;10999	559;6664;9289;10999
A0A9R0ENI1;A0A2H1VI58	A0A9R0ENI1;A0A2H1VI58	1;1	1;1	1;1			tr|A0A9R0ENI1|A0A9R0ENI1_SPOFR Vacuolar protein-sorting-associated protein 25 OS=Spodoptera frugiperda OX=7108 GN=LOC118273754 PE=3 SV=1;tr|A0A2H1VI58|A0A2H1VI58_SPOFR Inositol-pentakisphosphate 2-kinase OS=Spodoptera frugiperda OX=7108 GN=SFRICE_002087 PE	2	1	1	1	1	1	1	8.6	8.6	8.6	20.454	175	175;513	0.0070621	1.333	8.6	511930	511930	73133	73133	1				132	3505	TRUE	3551	4447	6786	6786
A0A2H1VIA1;E9KH48	A0A2H1VIA1	10;1	10;1	10;1			tr|A0A2H1VIA1|A0A2H1VIA1_SPOFR 26S proteasome non-ATPase regulatory subunit 2 OS=Spodoptera frugiperda OX=7108 GN=LOC118269022 PE=3 SV=1	2	10	10	10	10	10	10	16.5	16.5	16.5	101.89	931	931;167	0	25.544	16.5	112000000	112000000	2285800	2285800	9				133	133;1984;2353;2929;3432;3884;4335;4396;5047;5428	True;True;True;True;True;True;True;True;True;True	136;2010;2384;2966;3477;3943;4406;4467;5129;5515	172;2507;2980;3707;3708;4362;4995;5603;5678;6523;6995	241;3804;4582;5674;5675;6662;7618;8490;8587;9958;10684	241;3804;4582;5674;6662;7618;8490;8587;9958;10684
A0A2H1VIH1	A0A2H1VIH1	4	4	4			tr|A0A2H1VIH1|A0A2H1VIH1_SPOFR HECT-type E3 ubiquitin transferase OS=Spodoptera frugiperda OX=7108 GN=LOC118263371 PE=4 SV=1	1	4	4	4	4	4	4	8.9	8.9	8.9	102.76	911	911	0	5.6965	8.9	67746000	67746000	1472700	1472700	5				134	295;364;1758;3989	True;True;True;True	299;370;1782;4048	378;463;2240;5120	548;679;3398;7783;7784	548;679;3398;7784
A0A2H1VIM3;A0A9R0DFS8;A0A9R0DFS1	A0A2H1VIM3;A0A9R0DFS8;A0A9R0DFS1	3;3;3	3;3;3	3;3;3			tr|A0A2H1VIM3|A0A2H1VIM3_SPOFR SFRICE_019241 (Fragment) OS=Spodoptera frugiperda OX=7108 GN=SFRICE_019241 PE=4 SV=1;tr|A0A9R0DFS8|A0A9R0DFS8_SPOFR Protein DEK isoform X2 OS=Spodoptera frugiperda OX=7108 GN=LOC118277058 PE=4 SV=1;tr|A0A9R0DFS1|A0A9R0DFS1_SP	3	3	3	3	3	3	3	8.3	8.3	8.3	59.788	545	545;615;647	0	9.5038	8.3	138940000	138940000	8172700	8172700	3				135	430;2720;3576	True;True;True	437;2756;3624	547;3430;4532	802;5246;6902	802;5246;6902
A0A2H1VIM8;A0A9R0D8A3	A0A2H1VIM8;A0A9R0D8A3	1;1	1;1	1;1			tr|A0A2H1VIM8|A0A2H1VIM8_SPOFR SFRICE_021254 (Fragment) OS=Spodoptera frugiperda OX=7108 GN=SFRICE_021254 PE=4 SV=1;tr|A0A9R0D8A3|A0A9R0D8A3_SPOFR Activating signal cointegrator 1 complex subunit 2 OS=Spodoptera frugiperda OX=7108 GN=LOC118272017 PE=4 SV=1	2	1	1	1	1	1	1	3.9	3.9	3.9	44.14	386	386;743	0	6.9008	3.9	3025600	3025600	177980	177980	1				136	5474	TRUE	5561	7052	10774	10774
A0A2H1VIP1	A0A2H1VIP1	6	6	6			tr|A0A2H1VIP1|A0A2H1VIP1_SPOFR Eukaryotic translation initiation factor 3 subunit B OS=Spodoptera frugiperda OX=7108 GN=LOC118264488 PE=3 SV=1	1	6	6	6	6	6	6	11.6	11.6	11.6	80.778	697	697	0	18.827	11.6	331010000	331010000	12260000	12260000	7				137	1514;3115;3451;4594;5655;5707	True;True;True;True;True;True	1535;3155;3496;4669;5743;5796	1948;3931;4381;5956;7265;7334	2996;6004;6688;9089;9090;11071;11189	2996;6004;6688;9089;11071;11189
A0A2H1VIQ4;A0A9R0EGK0	A0A2H1VIQ4;A0A9R0EGK0	8;8	8;8	8;8			tr|A0A2H1VIQ4|A0A2H1VIQ4_SPOFR ribose-5-phosphate isomerase OS=Spodoptera frugiperda OX=7108 GN=SFRICE_005007 PE=3 SV=1;tr|A0A9R0EGK0|A0A9R0EGK0_SPOFR ribose-5-phosphate isomerase OS=Spodoptera frugiperda OX=7108 GN=LOC118263912 PE=3 SV=1	2	8	8	8	8	8	8	42.6	42.6	42.6	26.084	237	237;265	0	15.444	42.6	303580000	303580000	23353000	23353000	10				138	189;606;1822;2531;2787;3200;3734;5693	True;True;True;True;True;True;True;True	193;614;1847;2565;2824;3242;3784;5782	253;756;2311;3196;3517;4040;4764;7317	380;1121;3519;3520;4904;5392;5393;6150;7259;11165	380;1121;3519;4904;5392;6150;7259;11165
A0A9R0DIG8;A0A2H1VIR2	A0A9R0DIG8;A0A2H1VIR2	2;2	2;2	2;2			tr|A0A9R0DIG8|A0A9R0DIG8_SPOFR Mothers against decapentaplegic homolog OS=Spodoptera frugiperda OX=7108 GN=LOC118279647 PE=3 SV=1;tr|A0A2H1VIR2|A0A2H1VIR2_SPOFR Mothers against decapentaplegic homolog OS=Spodoptera frugiperda OX=7108 GN=LOC118279647 PE=3 S	2	2	2	2	2	2	2	4.9	4.9	4.9	50.584	451	451;461	0.0015038	1.8254	4.9	18604000	18604000	845610	845610	2				139	2285;5563	True;True	2314;5650	2894;7157	4455;10930	4455;10930
A0A9R0DF69;A0A2H1VIU1	A0A9R0DF69;A0A2H1VIU1	2;2	2;2	2;2			tr|A0A9R0DF69|A0A9R0DF69_SPOFR protein O-GlcNAc transferase OS=Spodoptera frugiperda OX=7108 GN=LOC118276516 PE=3 SV=1;tr|A0A2H1VIU1|A0A2H1VIU1_SPOFR protein O-GlcNAc transferase OS=Spodoptera frugiperda OX=7108 GN=LOC118276516 PE=3 SV=1	2	2	2	2	2	2	2	2	2	2	96.384	864	864;1061	0.0015106	1.854	2	26637000	26637000	719920	719920	2				140	2061;2383	True;True	2088;2414	2593;3016	3930;4645	3930;4645
A0A2H1VIU9;A0A9R0DNW5;A0A9R0DP28	A0A2H1VIU9;A0A9R0DNW5;A0A9R0DP28	4;4;4	4;4;4	4;4;4			tr|A0A2H1VIU9|A0A2H1VIU9_SPOFR Eukaryotic translation initiation factor 5 OS=Spodoptera frugiperda OX=7108 GN=SFRICE_008035 PE=3 SV=1;tr|A0A9R0DNW5|A0A9R0DNW5_SPOFR Eukaryotic translation initiation factor 5 OS=Spodoptera frugiperda OX=7108 GN=LOC118267830	3	4	4	4	4	4	4	8.7	8.7	8.7	50.586	458	458;458;462	0	5.1694	8.7	78388000	78388000	2799600	2799600	6				141	244;1517;3428;4074	True;True;True;True	248;1538;3473;4138	320;321;1951;4357;5223	470;471;472;2999;6655;7927	471;2999;6655;7927
A0A2H1VJ16	A0A2H1VJ16	3	3	3			tr|A0A2H1VJ16|A0A2H1VJ16_SPOFR Small nuclear ribonucleoprotein Sm D2 OS=Spodoptera frugiperda OX=7108 GN=LOC118270441 PE=3 SV=1	1	3	3	3	3	3	3	31.9	31.9	31.9	13.375	119	119	0	10.652	31.9	33425000	33425000	4775000	4775000	3				142	1726;2297;4021	True;True;True	1750;2327;4083	2199;2910;5164	3334;4479;7843	3334;4479;7843
A0A2H1VJB7;A0A9R0DR69	A0A2H1VJB7;A0A9R0DR69	5;5	5;5	5;5			tr|A0A2H1VJB7|A0A2H1VJB7_SPOFR Nuclear pore protein OS=Spodoptera frugiperda OX=7108 GN=SFRICE_000322 PE=3 SV=1;tr|A0A9R0DR69|A0A9R0DR69_SPOFR Nuclear pore complex protein Nup93-like OS=Spodoptera frugiperda OX=7108 GN=LOC118273474 PE=3 SV=1	2	5	5	5	5	5	5	7.8	7.8	7.8	93.208	821	821;1489	0	6.2425	7.8	18594000	18594000	350830	350830	5				143	398;1483;1848;3453;5448	True;True;True;True;True	405;1504;1873;3498;5535	504;1912;2341;4383;7020	734;2951;3562;6690;10717	734;2951;3562;6690;10717
A0A2H1VJE7;A0A9R0DKK0;A0A9R0DKG8;A0A9R0DKC5;A0A9R0DKT8;A0A9R0DKG0;A0A9R0ET79;A0A9R0DKW3;A0A9R0ESZ1;A0A9R0DKD7;A0A2H1WME8	A0A2H1VJE7;A0A9R0DKK0;A0A9R0DKG8;A0A9R0DKC5;A0A9R0DKT8;A0A9R0DKG0;A0A9R0ET79;A0A9R0DKW3;A0A9R0ESZ1;A0A9R0DKD7;A0A2H1WME8	13;12;12;12;12;12;12;12;12;12;8	13;12;12;12;12;12;12;12;12;12;8	13;12;12;12;12;12;12;12;12;12;8			tr|A0A2H1VJE7|A0A2H1VJE7_SPOFR ribonuclease Z OS=Spodoptera frugiperda OX=7108 GN=SFRICE_017182 PE=3 SV=1;tr|A0A9R0DKK0|A0A9R0DKK0_SPOFR ribonuclease Z OS=Spodoptera frugiperda OX=7108 GN=LOC118281764 PE=3 SV=1;tr|A0A9R0DKG8|A0A9R0DKG8_SPOFR ribonuclease Z	11	13	13	13	13	13	13	19.5	19.5	19.5	111.62	994	994;1490;1513;1529;1530;1531;1549;1560;1564;1565;649	0	55.578	19.5	190050000	190050000	3959300	3959300	12				144	2163;2336;3721;4204;4591;4622;4652;5113;5142;5737;5883;5926;6017	True;True;True;True;True;True;True;True;True;True;True;True;True	2190;2367;3771;4273;4666;4697;4727;5195;5225;5827;5976;6021;6113	2731;2732;2963;4751;5399;5953;5986;6020;6597;6630;7366;7546;7601;7739	4180;4181;4558;7243;8172;8173;9085;9133;9181;10062;10111;11232;11493;11494;11583;11798	4180;4558;7243;8172;9085;9133;9181;10062;10111;11232;11493;11583;11798
A0A9R0CXQ7;A0A2H1VJI6	A0A9R0CXQ7;A0A2H1VJI6	5;5	5;5	5;5			tr|A0A9R0CXQ7|A0A9R0CXQ7_SPOFR Nuclear autoantigenic sperm protein OS=Spodoptera frugiperda OX=7108 GN=LOC118264472 PE=3 SV=1;tr|A0A2H1VJI6|A0A2H1VJI6_SPOFR SFRICE_014541 OS=Spodoptera frugiperda OX=7108 GN=SFRICE_014541 PE=3 SV=1	2	5	5	5	5	5	5	19.3	19.3	19.3	43.148	405	405;407	0	16.792	19.3	105540000	105540000	6208200	6208200	9				145	1207;2250;2533;4988;5089	True;True;True;True;True	1226;2279;2567;5069;5171	1565;2854;2855;3198;6450;6571	2377;4405;4406;4407;4408;4409;4906;9847;10029	2377;4408;4906;9847;10029
A0A9R0EJ92;A0A2H1VJT2	A0A9R0EJ92;A0A2H1VJT2	4;4	4;4	4;4			tr|A0A9R0EJ92|A0A9R0EJ92_SPOFR Huntingtin-interacting protein K OS=Spodoptera frugiperda OX=7108 GN=LOC118268134 PE=4 SV=1;tr|A0A2H1VJT2|A0A2H1VJT2_SPOFR SFRICE_005084 OS=Spodoptera frugiperda OX=7108 GN=SFRICE_005084 PE=4 SV=1	2	4	4	4	4	4	4	38.3	38.3	38.3	13.518	120	120;120	0	20.226	38.3	63646000	63646000	10608000	10608000	8				146	93;1147;1148;2076	True;True;True;True	95;1164;1165;2103	111;1451;1452;2615	150;2201;2202;3964;3965;3966;3967;3968;3969	150;2201;2202;3966
A0A2H1VJX0	A0A2H1VJX0	4	4	4			tr|A0A2H1VJX0|A0A2H1VJX0_SPOFR M7GpppN-mRNA hydrolase OS=Spodoptera frugiperda OX=7108 GN=LOC118274301 PE=3 SV=1	1	4	4	4	4	4	4	11.9	11.9	11.9	48.116	421	421	0	8.7441	11.9	18199000	18199000	957860	957860	6				147	1965;3142;3633;5608	True;True;True;True	1991;3183;3682;5696	2483;3966;4644;7208	3766;3767;6055;6056;7102;10994	3767;6055;7102;10994
A0A2H1VJZ7;A0A9R0E2R5	A0A2H1VJZ7;A0A9R0E2R5	8;8	8;8	8;8			tr|A0A2H1VJZ7|A0A2H1VJZ7_SPOFR FACT complex subunit SSRP1 OS=Spodoptera frugiperda OX=7108 GN=SFRICE_021761 PE=3 SV=1;tr|A0A9R0E2R5|A0A9R0E2R5_SPOFR FACT complex subunit SSRP1 OS=Spodoptera frugiperda OX=7108 GN=LOC118281790 PE=3 SV=1	2	8	8	8	8	8	8	11.9	11.9	11.9	78.58	695	695;725	0	10.702	11.9	137270000	137270000	3710000	3710000	8				148	245;1508;1757;2031;2519;3050;3819;3900	True;True;True;True;True;True;True;True	249;1529;1781;2057;2553;3089;3875;3959	322;1942;2239;2559;3180;3851;4920;5019	473;2990;3397;3874;4876;5877;7506;7644	473;2990;3397;3874;4876;5877;7506;7644
A0A2H1VK95;A0A9R0CV83	A0A2H1VK95;A0A9R0CV83	9;9	9;9	9;9			tr|A0A2H1VK95|A0A2H1VK95_SPOFR Nucleoside diphosphate kinase OS=Spodoptera frugiperda OX=7108 GN=SFRICE_001625 PE=3 SV=1;tr|A0A9R0CV83|A0A9R0CV83_SPOFR Nucleoside diphosphate kinase OS=Spodoptera frugiperda OX=7108 GN=LOC118262857 PE=3 SV=1	2	9	9	9	9	9	9	68	68	68	17.101	153	153;176	0	37.032	68	261190000	261190000	26119000	26119000	12				149	1130;1564;1722;1874;2240;3940;3941;4327;5943	True;True;True;True;True;True;True;True;True	1147;1585;1746;1899;2269;3999;4000;4396;6039	1431;2011;2195;2368;2843;5062;5063;5064;5591;7622	2177;3074;3330;3601;4383;7703;7704;7705;7706;8473;8474;11608;11609	2177;3074;3330;3601;4383;7705;7706;8473;11609
A0A9R0EIM7;A0A2H1VKI1	A0A9R0EIM7;A0A2H1VKI1	12;12	12;12	12;12			tr|A0A9R0EIM7|A0A9R0EIM7_SPOFR Endoplasmic reticulum resident protein 44 OS=Spodoptera frugiperda OX=7108 GN=LOC118267257 PE=4 SV=1;tr|A0A2H1VKI1|A0A2H1VKI1_SPOFR SFRICE_010556 OS=Spodoptera frugiperda OX=7108 GN=SFRICE_010556 PE=4 SV=1	2	12	12	12	12	12	12	37.6	37.6	37.6	47.001	407	407;407	0	41.826	37.6	178790000	178790000	9410000	9410000	24				150	906;1062;1080;1194;1459;2127;2843;4320;4661;4884;5188;5336	True;True;True;True;True;True;True;True;True;True;True;True	917;1079;1097;1213;1480;2154;2880;4389;4736;4964;5271;5419	1127;1344;1365;1549;1885;1886;2686;3603;5579;5580;5581;6030;6316;6691;6870	1682;2025;2053;2351;2352;2353;2900;2901;2902;2903;2904;2905;2906;2907;4065;5526;8458;8459;8460;9197;9198;9638;10216;10489	1682;2025;2053;2352;2905;4065;5526;8460;9197;9638;10216;10489
A0A9R0DCT5;A0A2H1VKQ6	A0A9R0DCT5;A0A2H1VKQ6	1;1	1;1	1;1			tr|A0A9R0DCT5|A0A9R0DCT5_SPOFR Carboxypeptidase OS=Spodoptera frugiperda OX=7108 GN=LOC118274807 PE=3 SV=1;tr|A0A2H1VKQ6|A0A2H1VKQ6_SPOFR Carboxypeptidase OS=Spodoptera frugiperda OX=7108 GN=SFRICE_006299 PE=3 SV=1	2	1	1	1	1	1	1	1.5	1.5	1.5	54.761	477	477;477	0.0056657	1.3676	1.5	0	0	0	0	1				151	3570	TRUE	3618	4523	6887	6887
A0A9R0D0H9;A0A2H1VKW0	A0A9R0D0H9;A0A2H1VKW0	7;7	7;7	7;7			tr|A0A9R0D0H9|A0A9R0D0H9_SPOFR tRNA pseudouridine synthase OS=Spodoptera frugiperda OX=7108 GN=LOC118266660 PE=3 SV=1;tr|A0A2H1VKW0|A0A2H1VKW0_SPOFR tRNA pseudouridine synthase OS=Spodoptera frugiperda OX=7108 GN=SFRICE_000840 PE=3 SV=1	2	7	7	7	7	7	7	28	28	28	37.046	318	318;318	0	15.404	28	117680000	117680000	5883900	5883900	8				152	1770;3728;3928;4716;4964;5590;5939	True;True;True;True;True;True;True	1794;3778;3987;4791;5044;5677;6034	2254;4758;5047;5048;6100;6419;6420;7187;7617	3423;7252;7682;7683;9291;9803;9804;10966;11601	3423;7252;7683;9291;9804;10966;11601
A0A8E5NHQ1;Q95V33;A0A2H1VL06	A0A8E5NHQ1;Q95V33;A0A2H1VL06	5;5;5	5;5;5	5;5;5			tr|A0A8E5NHQ1|A0A8E5NHQ1_SPOFR Ribosomal protein S5 (Fragment) OS=Spodoptera frugiperda OX=7108 GN=RpS5 PE=3 SV=1;tr|Q95V33|Q95V33_SPOFR Ribosomal protein S5 OS=Spodoptera frugiperda OX=7108 PE=2 SV=1;tr|A0A2H1VL06|A0A2H1VL06_SPOFR 40S ribosomal protein S5	3	5	5	5	5	5	5	27.6	27.6	27.6	22.275	199	199;219;219	0	16.888	27.6	49789000	49789000	4978900	4978900	9				153	1961;3548;5045;5622;5935	True;True;True;True;True	1987;3596;5127;5710;6030	2479;4500;6521;7225;7612	3762;6858;9955;9956;11014;11015;11016;11017;11595	3762;6858;9955;11017;11595
A0A2H1VL32	A0A2H1VL32	10	1	1			tr|A0A2H1VL32|A0A2H1VL32_SPOFR SFRICE_006579 (Fragment) OS=Spodoptera frugiperda OX=7108 GN=SFRICE_006579 PE=4 SV=1	1	10	1	1	10	1	1	22.4	2.9	2.9	74.148	652	652	0	6.196	22.4	11908000	11908000	410630	410630	2				154	102;2039;2824;2927;3433;4336;4529;5073;5365;5434	False;False;False;True;False;False;False;False;False;False	105;2065;2861;2964;3478;4407;4602;5155;5449;5521	134;135;2569;2570;3572;3705;4363;5604;5605;5847;6554;6922;7002	190;191;192;3892;3893;5474;5671;5672;6663;8491;8492;8847;10007;10008;10590;10693	191;3893;5474;5671;6663;8492;8847;10007;10590;10693
A0A2H1VLF8	A0A2H1VLF8	2	2	2			tr|A0A2H1VLF8|A0A2H1VLF8_SPOFR N-alpha-acetyltransferase 20 OS=Spodoptera frugiperda OX=7108 GN=LOC118267522 PE=3 SV=1	1	2	2	2	2	2	2	21.4	21.4	21.4	19.876	173	173	0.0015408	1.9712	21.4	57551000	57551000	7193900	7193900	1				155	125;4898	True;True	128;4978	161;6333	226;9667	226;9667
A0A2H1VLT7	A0A2H1VLT7	2	2	2			tr|A0A2H1VLT7|A0A2H1VLT7_SPOFR Eukaryotic translation initiation factor 2 subunit 2 OS=Spodoptera frugiperda OX=7108 GN=LOC118273908 PE=3 SV=1	1	2	2	2	2	2	2	5.8	5.8	5.8	34.927	309	309	0.0015385	1.9681	5.8	79796000	79796000	6138200	6138200	1				156	1512;4768	True;True	1533;4844	1946;6164	2994;9390	2994;9390
A0A9R0DAH3;A0A2H1VLU3	A0A9R0DAH3;A0A2H1VLU3	7;7	7;7	7;7			tr|A0A9R0DAH3|A0A9R0DAH3_SPOFR Protein arginine N-methyltransferase 3-like OS=Spodoptera frugiperda OX=7108 GN=LOC118273365 PE=4 SV=1;tr|A0A2H1VLU3|A0A2H1VLU3_SPOFR SFRICE_012074 OS=Spodoptera frugiperda OX=7108 GN=SFRICE_012074 PE=4 SV=1	2	7	7	7	7	7	7	18.7	18.7	18.7	59.046	518	518;518	0	32.797	18.7	202520000	202520000	8438500	8438500	10				157	780;1023;1258;2287;5031;5063;5250	True;True;True;True;True;True;True	789;1040;1279;2316;5113;5145;5333	972;1298;1636;2896;6504;6541;6771;6772	1458;1459;1957;2500;4457;4458;9929;9991;10347;10348	1459;1957;2500;4458;9929;9991;10348
A0A9R0D8K1;A0A2H1VM01	A0A9R0D8K1;A0A2H1VM01	1;1	1;1	1;1			tr|A0A9R0D8K1|A0A9R0D8K1_SPOFR Xylose isomerase OS=Spodoptera frugiperda OX=7108 GN=LOC118272316 PE=3 SV=1;tr|A0A2H1VM01|A0A2H1VM01_SPOFR Xylose isomerase OS=Spodoptera frugiperda OX=7108 GN=SFRICE_018261 PE=3 SV=1	2	1	1	1	1	1	1	2.2	2.2	2.2	54.176	461	461;461	0.0097493	1.2682	2.2	96449000	96449000	3325800	3325800	1				158	3806	TRUE	3861	4905	7487	7487
A0A2H1VM24	A0A2H1VM24	7	7	7			tr|A0A2H1VM24|A0A2H1VM24_SPOFR Prefoldin subunit 2 OS=Spodoptera frugiperda OX=7108 GN=LOC126912952 PE=3 SV=1	1	7	7	7	7	7	7	60.1	60.1	60.1	16.02	143	143	0	58.711	60.1	361080000	361080000	40120000	40120000	11				159	1143;2570;2644;3831;4846;5210;5352	True;True;True;True;True;True;True	1160;2605;2680;3888;4924;5293;5435	1446;1447;3244;3245;3345;4934;6269;6720;6721;6887;6888	2195;2196;4963;4964;5117;7523;9554;10257;10258;10259;10517;10518	2196;4964;5117;7523;9554;10257;10517
A0A2H1VM92	A0A2H1VM92	2	2	2			tr|A0A2H1VM92|A0A2H1VM92_SPOFR Proteasome subunit alpha type OS=Spodoptera frugiperda OX=7108 GN=LOC118278603 PE=3 SV=1	1	2	2	2	2	2	2	13.7	13.7	13.7	25.899	234	234	0	2.6509	13.7	3891900	3891900	277990	277990	4				160	5988;5998	True;True	6084;6094	7704;7715	11749;11750;11751;11762	11751;11762
A0A9R0E1J0;A0A2H1VMD1	A0A9R0E1J0;A0A2H1VMD1	6;6	6;6	6;6			tr|A0A9R0E1J0|A0A9R0E1J0_SPOFR phosphoribosylformylglycinamidine synthase OS=Spodoptera frugiperda OX=7108 GN=LOC118281765 PE=3 SV=1;tr|A0A2H1VMD1|A0A2H1VMD1_SPOFR phosphoribosylformylglycinamidine synthase OS=Spodoptera frugiperda OX=7108 GN=SFRICE_010965	2	6	6	6	6	6	6	5.6	5.6	5.6	146.61	1338	1338;1338	0	5.5056	5.6	63308000	63308000	989190	989190	6				161	826;1480;1855;2215;3398;5012	True;True;True;True;True;True	836;1501;1880;2243;3442;5094	1025;1909;2349;2802;4325;6484	1535;2947;3571;4299;4300;6615;9901	1535;2947;3571;4299;6615;9901
A0A2H1VME9;A0A9R0ELY6	A0A2H1VME9;A0A9R0ELY6	3;2	3;2	3;2			tr|A0A2H1VME9|A0A2H1VME9_SPOFR SFRICE_009109 OS=Spodoptera frugiperda OX=7108 GN=SFRICE_009109 PE=4 SV=1;tr|A0A9R0ELY6|A0A9R0ELY6_SPOFR Nucleoporin Nup43 OS=Spodoptera frugiperda OX=7108 GN=LOC118271760 PE=4 SV=1	2	3	3	3	3	3	3	10.1	10.1	10.1	38.796	346	346;346	0	2.7632	10.1	86486000	86486000	5405300	5405300	2				162	2208;2267;2426	True;True;True	2236;2296;2459	2791;2873;3068	4276;4431;4715	4276;4431;4715
A0A2H1VML7	A0A2H1VML7	20	1	1			tr|A0A2H1VML7|A0A2H1VML7_SPOFR SFRICE_012357 OS=Spodoptera frugiperda OX=7108 GN=SFRICE_012357 PE=4 SV=1	1	20	1	1	20	1	1	48	1.9	1.9	61.008	571	571	0	4.6406	48	138890000	138890000	4340200	4340200	1				163	15;53;285;619;719;798;1013;1075;1387;1771;2051;3536;3579;3753;4258;4273;4309;4627;4726;5920	False;False;False;False;False;False;False;True;False;False;False;False;False;False;False;False;False;False;False;False	15;55;289;627;728;808;1030;1092;1408;1795;2078;3584;3628;3804;4327;4342;4378;4702;4801;6014	18;65;367;368;779;901;993;1288;1360;1797;1798;2255;2583;4486;4588;4792;4793;5463;5480;5562;5563;5991;6112;7593	25;26;89;90;91;92;537;538;1168;1338;1339;1340;1341;1491;1943;1944;1945;1946;2048;2760;2761;3424;3425;3426;3427;3428;3429;3430;3917;6839;6840;7028;7295;7296;7297;7298;7299;7300;8261;8284;8433;8434;9138;9309;9310;11568	25;92;537;1168;1340;1491;1946;2048;2761;3428;3917;6840;7028;7296;8261;8284;8433;9138;9309;11568
A0A9R0E6S1;A0A2H1VMM4	A0A9R0E6S1;A0A2H1VMM4	5;5	5;5	5;5			tr|A0A9R0E6S1|A0A9R0E6S1_SPOFR GrpE protein homolog OS=Spodoptera frugiperda OX=7108 GN=LOC118278704 PE=3 SV=1;tr|A0A2H1VMM4|A0A2H1VMM4_SPOFR GrpE protein homolog OS=Spodoptera frugiperda OX=7108 GN=SFRICE_020877 PE=3 SV=1	2	5	5	5	5	5	5	40.4	40.4	40.4	24.979	230	230;230	0	61.684	40.4	177350000	177350000	13642000	13642000	6				164	259;454;838;1443;2114	True;True;True;True;True	263;461;848;1464;2141	338;577;1045;1865;2667	491;847;1568;1569;2862;4039	491;847;1569;2862;4039
A0A2H1VMN3;A0A9R0DAV5	A0A2H1VMN3;A0A9R0DAV5	4;4	4;4	4;4			tr|A0A2H1VMN3|A0A2H1VMN3_SPOFR SFRICE_012355 (Fragment) OS=Spodoptera frugiperda OX=7108 GN=SFRICE_012355 PE=4 SV=1;tr|A0A9R0DAV5|A0A9R0DAV5_SPOFR Reticulocalbin-2 OS=Spodoptera frugiperda OX=7108 GN=LOC118273583 PE=4 SV=1	2	4	4	4	4	4	4	17	17	17	26.242	229	229;326	0	5.0216	17	53742000	53742000	4134000	4134000	6				165	776;1339;3233;3672	True;True;True;True	785;1360;3275;3722	968;1733;4079;4693	1454;2659;2660;2661;6215;7171	1454;2661;6215;7171
A0A2H1VN68;A0A9R0CZT7	A0A2H1VN68;A0A9R0CZT7	3;2	3;2	3;2			tr|A0A2H1VN68|A0A2H1VN68_SPOFR SFRICE_003965 OS=Spodoptera frugiperda OX=7108 GN=SFRICE_003965 PE=4 SV=1;tr|A0A9R0CZT7|A0A9R0CZT7_SPOFR Eukaryotic translation elongation factor 1 epsilon-1 OS=Spodoptera frugiperda OX=7108 GN=LOC118266003 PE=4 SV=1	2	3	3	3	3	3	3	19.8	19.8	19.8	19.345	172	172;172	0	5.27	19.8	29349000	29349000	2668100	2668100	3				166	4339;5207;5567	True;True;True	4410;5290;5654	5609;6716;7161	8496;10253;10934	8496;10253;10934
A0A9R0EQJ6;A0A2H1VNA1	A0A9R0EQJ6;A0A2H1VNA1	3;3	3;3	3;3			tr|A0A9R0EQJ6|A0A9R0EQJ6_SPOFR 26S proteasome non-ATPase regulatory subunit 9 OS=Spodoptera frugiperda OX=7108 GN=LOC118277578 PE=3 SV=1;tr|A0A2H1VNA1|A0A2H1VNA1_SPOFR 26S proteasome non-ATPase regulatory subunit 9 OS=Spodoptera frugiperda OX=7108 GN=SFRIC	2	3	3	3	3	3	3	21.4	21.4	21.4	24.153	220	220;220	0	15.345	21.4	39987000	39987000	4443000	4443000	4				167	148;905;3331	True;True;True	151;916;3373	189;190;1125;1126;4211	261;262;1680;1681;6404	261;1681;6404
A0A2H1VNA8;Q8WSA3;A0A9R0E0E8;A0A9R0E0R9;A0A9R0F103;Q8WSA4;A0A9R0F006;A0A9R0E1H7;A0A9R0F2D3;A0A9R0E0D9	A0A2H1VNA8;Q8WSA3;A0A9R0E0E8;A0A9R0E0R9;A0A9R0F103;Q8WSA4;A0A9R0F006;A0A9R0E1H7;A0A9R0F2D3;A0A9R0E0D9	1;1;1;1;1;1;1;1;1;1	1;1;1;1;1;1;1;1;1;1	1;1;1;1;1;1;1;1;1;1			tr|A0A2H1VNA8|A0A2H1VNA8_SPOFR SFRICE_009774 (Fragment) OS=Spodoptera frugiperda OX=7108 GN=SFRICE_009774 PE=4 SV=1;tr|Q8WSA3|Q8WSA3_SPOFR Signal transducer and activator of transcription OS=Spodoptera frugiperda OX=7108 GN=STAT PE=2 SV=1;tr|A0A9R0E0E8|A0A	10	1	1	1	1	1	1	14.5	14.5	14.5	12.455	110	110;731;731;737;740;768;768;768;774;774	0	4.8525	14.5	914660	914660	152440	152440	1				168	5515	TRUE	5602	7102	10847	10847
A0A2H1VNE1	A0A2H1VNE1	3	3	3			tr|A0A2H1VNE1|A0A2H1VNE1_SPOFR Partner of xrn-2 protein 1-like OS=Spodoptera frugiperda OX=7108 GN=LOC118281042 PE=4 SV=1	1	3	3	3	3	3	3	29.8	29.8	29.8	12.299	104	104	0	10.346	29.8	111630000	111630000	18605000	18605000	2				169	4976;5010;5971	True;True;True	5057;5092;6067	6438;6482;7654	9834;9899;11647	9834;9899;11647
A0A9R0E420;A0A9R0F3R7;A0A9R0F0F1;A0A9R0E389;A0A2H1VNQ1;A0A9R0F2C1	A0A9R0E420;A0A9R0F3R7;A0A9R0F0F1;A0A9R0E389;A0A2H1VNQ1;A0A9R0F2C1	7;7;7;7;7;7	7;7;7;7;7;7	7;7;7;7;7;7			tr|A0A9R0E420|A0A9R0E420_SPOFR Sorting nexin OS=Spodoptera frugiperda OX=7108 GN=LOC118280197 PE=3 SV=1;tr|A0A9R0F3R7|A0A9R0F3R7_SPOFR Sorting nexin OS=Spodoptera frugiperda OX=7108 GN=LOC118280197 PE=3 SV=1;tr|A0A9R0F0F1|A0A9R0F0F1_SPOFR Sorting nexin-6 i	6	7	7	7	7	7	7	18.3	18.3	18.3	49.856	432	432;438;471;478;480;484	0	8.8884	18.3	97696000	97696000	3757500	3757500	7				170	655;968;3509;3658;4567;4706;5212	True;True;True;True;True;True;True	663;981;3557;3707;4641;4781;5295	820;1197;4456;4675;4676;5900;6089;6723	1221;1782;6799;7148;7149;8933;9279;10261	1221;1782;6799;7149;8933;9279;10261
A0A2H1VNU9	A0A2H1VNU9	21	21	21			tr|A0A2H1VNU9|A0A2H1VNU9_SPOFR Asparagine--tRNA ligase, cytoplasmic OS=Spodoptera frugiperda OX=7108 GN=LOC118274672 PE=3 SV=1	1	21	21	21	21	21	21	49.4	49.4	49.4	63.037	551	551	0	109.58	49.4	900830000	900830000	37535000	37535000	38				171	264;1045;1046;1099;1267;1360;1491;1530;1942;2055;2143;2645;2748;3006;3538;3655;3661;3682;5058;5252;5506	True;True;True;True;True;True;True;True;True;True;True;True;True;True;True;True;True;True;True;True;True	268;1062;1063;1116;1288;1381;1512;1551;1968;2082;2170;2681;2785;3044;3586;3704;3710;3732;5140;5335;5593	343;1325;1326;1392;1645;1764;1921;1922;1967;2453;2454;2587;2708;3346;3465;3466;3798;4488;4489;4671;4672;4679;4705;6535;6774;6775;7092;7093	497;498;1996;1997;1998;1999;2108;2109;2110;2111;2510;2708;2961;2962;3018;3725;3726;3924;4118;4119;4120;5118;5299;5300;5805;5806;6842;6843;7143;7144;7153;7154;7155;7183;9975;9976;10350;10351;10836;10837	498;1996;1999;2111;2510;2708;2961;3018;3725;3924;4120;5118;5299;5805;6842;7144;7154;7183;9976;10350;10836
A0A2H1VNV3	A0A2H1VNV3	1	1	1			tr|A0A2H1VNV3|A0A2H1VNV3_SPOFR SFRICE_002994 OS=Spodoptera frugiperda OX=7108 GN=SFRICE_002994 PE=4 SV=1	1	1	1	1	1	1	1	5.8	5.8	5.8	25.402	226	226	0	2.8993	5.8	15973000	15973000	1331100	1331100	1				172	3725	TRUE	3775	4755	7248	7248
A0A2H1VNY9	A0A2H1VNY9	11	11	11			tr|A0A2H1VNY9|A0A2H1VNY9_SPOFR Citrate synthase OS=Spodoptera frugiperda OX=7108 GN=LOC118262833 PE=3 SV=1	1	11	11	11	11	11	11	36.6	36.6	36.6	51.695	465	465	0	42.026	36.6	176490000	176490000	7673600	7673600	14				173	135;1772;1816;1877;1885;2156;3415;4625;4727;5413;5761	True;True;True;True;True;True;True;True;True;True;True	138;1796;1840;1902;1910;2183;3460;4700;4802;5499;5851	174;2256;2304;2371;2379;2724;4344;5989;6113;6977;7398	243;3431;3432;3510;3604;3605;3617;4165;6637;9136;9311;10658;11272;11273;11274	243;3432;3510;3605;3617;4165;6637;9136;9311;10658;11272
A0A2H1VPB4	A0A2H1VPB4	2	2	2			tr|A0A2H1VPB4|A0A2H1VPB4_SPOFR 26S proteasome non-ATPase regulatory subunit 13 OS=Spodoptera frugiperda OX=7108 GN=LOC118280467 PE=3 SV=1	1	2	2	2	2	2	2	6.2	6.2	6.2	42.649	386	386	0	6.7928	6.2	4901900	4901900	233420	233420	2				174	1668;5639	True;True	1691;5727	2127;7244	3237;11039	3237;11039
A0A9R0DVI4;A0A9R0EYK3;A0A9R0DUY9;A0A2H1VPK5;A0A9R0DUY2	A0A9R0DVI4;A0A9R0EYK3;A0A9R0DUY9;A0A2H1VPK5;A0A9R0DUY2	1;1;1;1;1	1;1;1;1;1	1;1;1;1;1			tr|A0A9R0DVI4|A0A9R0DVI4_SPOFR Nicotinamide-nucleotide adenylyltransferase OS=Spodoptera frugiperda OX=7108 GN=LOC118270344 PE=3 SV=1;tr|A0A9R0EYK3|A0A9R0EYK3_SPOFR Nicotinamide-nucleotide adenylyltransferase OS=Spodoptera frugiperda OX=7108 GN=LOC11827034	5	1	1	1	1	1	1	4.5	4.5	4.5	29.827	266	266;276;373;467;478	0.001548	2.0114	4.5	5044800	5044800	388060	388060	1				175	5937	TRUE	6032	7614	11597	11597
A0A2H1VPR7	A0A2H1VPR7	6	6	6			tr|A0A2H1VPR7|A0A2H1VPR7_SPOFR Developmentally-regulated GTP-binding protein 2 OS=Spodoptera frugiperda OX=7108 GN=LOC118264348 PE=4 SV=1	1	6	6	6	6	6	6	19.2	19.2	19.2	40.701	364	364	0	12.868	19.2	24690000	24690000	1175700	1175700	8				176	1688;2327;3838;4801;5301;5796	True;True;True;True;True;True	1712;2358;3897;4877;5384;5886	2153;2950;4947;6202;6832;7439	3274;4541;7548;9450;10438;11326;11327;11328	3274;4541;7548;9450;10438;11327
A0A9R0EQ27;A0A2H1VQ31	A0A9R0EQ27;A0A2H1VQ31	5;5	5;5	5;5			tr|A0A9R0EQ27|A0A9R0EQ27_SPOFR Delta(3,5)-Delta(2,4)-dienoyl-CoA isomerase, mitochondrial OS=Spodoptera frugiperda OX=7108 GN=LOC118276727 PE=4 SV=1;tr|A0A2H1VQ31|A0A2H1VQ31_SPOFR SFRICE_027087 (Fragment) OS=Spodoptera frugiperda OX=7108 GN=SFRICE_027087 P	2	5	5	5	5	5	5	16.1	16.1	16.1	33.869	305	305;360	0	8.4897	16.1	52647000	52647000	2393100	2393100	7				177	771;1364;4789;5490;5740	True;True;True;True;True	780;1385;4865;5577;5830	963;1768;6187;7070;7369	1447;1448;2712;9427;10803;10804;11237	1448;2712;9427;10803;11237
A0A2H1VQ91	A0A2H1VQ91	4	4	4			tr|A0A2H1VQ91|A0A2H1VQ91_SPOFR SFRICE_022802 OS=Spodoptera frugiperda OX=7108 GN=LOC118273054 PE=3 SV=1	1	4	4	4	4	4	4	23.9	23.9	23.9	19.572	188	188	0	8.9907	23.9	56252000	56252000	5113800	5113800	5				178	1994;3799;5092;5641	True;True;True;True	2020;3854;5174;5729	2517;4898;6574;7246	3814;7478;10032;11041;11042	3814;7478;10032;11042
A0A2H1VQC5;A0A9R0D6V7	A0A2H1VQC5;A0A9R0D6V7	4;4	4;4	4;4			tr|A0A2H1VQC5|A0A2H1VQC5_SPOFR Nucleolar protein 56 OS=Spodoptera frugiperda OX=7108 GN=SFRICE_001365 PE=3 SV=1;tr|A0A9R0D6V7|A0A9R0D6V7_SPOFR Nucleolar protein 56 OS=Spodoptera frugiperda OX=7108 GN=LOC118270631 PE=3 SV=1	2	4	4	4	4	4	4	17.4	17.4	17.4	51.403	460	460;461	0	5.0706	17.4	6659600	6659600	289550	289550	4				179	1572;3074;4725;5277	True;True;True;True	1593;3113;4800;5360	2019;3881;6111;6805	3084;5921;9308;10400	3084;5921;9308;10400
A0A9R0D5P1;A0A2H1VQE9	A0A9R0D5P1;A0A2H1VQE9	5;5	5;5	5;5			tr|A0A9R0D5P1|A0A9R0D5P1_SPOFR Transcription elongation factor B polypeptide 3 OS=Spodoptera frugiperda OX=7108 GN=LOC118269628 PE=4 SV=1;tr|A0A2H1VQE9|A0A2H1VQE9_SPOFR SFRICE_004071 OS=Spodoptera frugiperda OX=7108 GN=SFRICE_004071 PE=4 SV=1	2	5	5	5	5	5	5	8.3	8.3	8.3	91.489	822	822;822	0	15.752	8.3	46986000	46986000	1342500	1342500	8				180	500;729;1270;3056;3662	True;True;True;True;True	507;738;1291;3095;3711	629;914;1648;1649;3858;4680	932;1367;1368;2517;2518;5888;5889;7156	932;1368;2517;5889;7156
A0A9R0D651;A0A2H1VQU3	A0A9R0D651;A0A2H1VQU3	21;21	21;21	21;21			tr|A0A9R0D651|A0A9R0D651_SPOFR Programmed cell death 6-interacting protein OS=Spodoptera frugiperda OX=7108 GN=LOC118270106 PE=4 SV=1;tr|A0A2H1VQU3|A0A2H1VQU3_SPOFR SFRICE_019685 OS=Spodoptera frugiperda OX=7108 GN=SFRICE_019685 PE=4 SV=1	2	21	21	21	21	21	21	37.3	37.3	37.3	91.57	845	845;845	0	57.397	37.3	365000000	365000000	9125100	9125100	24				181	28;322;407;483;721;827;1283;1665;1872;1946;1983;2522;2703;2874;3061;3315;3439;4135;4406;5323;5636	True;True;True;True;True;True;True;True;True;True;True;True;True;True;True;True;True;True;True;True;True	28;326;414;490;730;837;1304;1688;1897;1972;2009;2556;2739;2911;3100;3357;3484;4202;4477;5406;5724	34;410;514;612;903;1026;1668;2124;2366;2459;2460;2506;3183;3410;3646;3647;3864;4191;4369;5301;5302;5688;6857;7240	44;596;748;893;894;895;1343;1344;1536;2558;3232;3599;3732;3733;3803;4882;5215;5588;5589;5896;6374;6676;8037;8038;8600;10473;11035	44;596;748;895;1343;1536;2558;3232;3599;3732;3803;4882;5215;5589;5896;6374;6676;8037;8600;10473;11035
A0A2H1VQY3	A0A2H1VQY3	6	6	6			tr|A0A2H1VQY3|A0A2H1VQY3_SPOFR Aldehyde dehydrogenase, mitochondrial OS=Spodoptera frugiperda OX=7108 GN=LOC118273932 PE=3 SV=1	1	6	6	6	6	6	6	19.4	19.4	19.4	55.75	509	509	0	17.869	19.4	24501000	24501000	816680	816680	6				182	1945;2085;2251;4637;4785;4978	True;True;True;True;True;True	1971;2112;2280;4712;4861;5059	2458;2624;2856;6004;6183;6440	3731;3980;4410;9162;9423;9836	3731;3980;4410;9162;9423;9836
A0A2H1VRB7	A0A2H1VRB7	2	2	2			tr|A0A2H1VRB7|A0A2H1VRB7_SPOFR V-type proton ATPase subunit G OS=Spodoptera frugiperda OX=7108 GN=LOC118277432 PE=3 SV=1	1	2	2	2	2	2	2	28.2	28.2	28.2	13.684	117	117	0	3.2107	28.2	4042700	4042700	808540	808540	2				183	497;803	True;True	504;813	626;998	918;1497	918;1497
A0A2H1VRE1	A0A2H1VRE1	2	2	2			tr|A0A2H1VRE1|A0A2H1VRE1_SPOFR Large ribosomal subunit protein uL16 OS=Spodoptera frugiperda OX=7108 GN=LOC118266624 PE=2 SV=1	1	2	2	2	2	2	2	8.2	8.2	8.2	25.578	219	219	0	2.4415	8.2	13154000	13154000	1461500	1461500	2				184	2351;3757	True;True	2382;3809	2978;4799	4580;7309	4580;7309
A0A2H1VRE9	A0A2H1VRE9	1	1	1			tr|A0A2H1VRE9|A0A2H1VRE9_SPOFR MAPK regulated corepressor interacting protein 2 OS=Spodoptera frugiperda OX=7108 GN=LOC118272645 PE=3 SV=1	1	1	1	1	1	1	1	10.1	10.1	10.1	17.052	149	149	0	2.5871	10.1	283590000	283590000	47265000	47265000	1				185	2544	TRUE	2578	3210	4924	4924
A0A2H1VRH1;A0A9R0EY34;A0A9R0DJD6;A0A9R0DJ90;A0A9R0ERX3	A0A2H1VRH1;A0A9R0EY34;A0A9R0DJD6;A0A9R0DJ90;A0A9R0ERX3	7;7;7;7;7	7;7;7;7;7	7;7;7;7;7			tr|A0A2H1VRH1|A0A2H1VRH1_SPOFR SFRICE_003068 (Fragment) OS=Spodoptera frugiperda OX=7108 GN=SFRICE_003068 PE=4 SV=1;tr|A0A9R0EY34|A0A9R0EY34_SPOFR Uncharacterized protein LOC118280612 isoform X4 OS=Spodoptera frugiperda OX=7108 GN=LOC118280612 PE=4 SV=1;tr	5	7	7	7	7	7	7	10	10	10	92.312	823	823;936;946;947;957	0	11.272	10	190440000	190440000	5290000	5290000	7				186	238;839;1071;2073;2202;2785;5763	True;True;True;True;True;True;True	242;849;1088;2100;2230;2822;5853	314;1046;1355;2610;2782;3515;7400	462;463;1570;2043;3956;4263;4264;5390;11276	462;1570;2043;3956;4263;5390;11276
A0A9R0DW70;A0A9R0EXZ5;A0A9R0DVR2;A0A9R0DWI2;A0A9R0D476;A0A9R0EK05;A0A9R0D4B1;A0A9R0D4C2;A0A2H1VRT1	A0A9R0DW70;A0A9R0EXZ5;A0A9R0DVR2;A0A9R0DWI2;A0A9R0D476;A0A9R0EK05;A0A9R0D4B1;A0A9R0D4C2;A0A2H1VRT1	1;1;1;1;1;1;1;1;1	1;1;1;1;1;1;1;1;1	1;1;1;1;1;1;1;1;1			tr|A0A9R0DW70|A0A9R0DW70_SPOFR Uncharacterized protein LOC118268910 isoform X8 OS=Spodoptera frugiperda OX=7108 GN=LOC118268910 PE=4 SV=1;tr|A0A9R0EXZ5|A0A9R0EXZ5_SPOFR Uncharacterized protein LOC118268910 isoform X7 OS=Spodoptera frugiperda OX=7108 GN=LOC	9	1	1	1	1	1	1	3.5	3.5	3.5	86.46	795	795;833;834;846;847;851;884;885;910	0	5.5896	3.5	2966600	2966600	87252	87252	2				187	5750	TRUE	5840	7384	11256;11257	11256
A0A9R0D453;A0A2H1VS26	A0A9R0D453;A0A2H1VS26	2;2	2;2	2;2			tr|A0A9R0D453|A0A9R0D453_SPOFR Glucosidase II subunit alpha OS=Spodoptera frugiperda OX=7108 GN=LOC118268831 PE=3 SV=1;tr|A0A2H1VS26|A0A2H1VS26_SPOFR Glucosidase II subunit alpha OS=Spodoptera frugiperda OX=7108 GN=SFRICE_010901 PE=3 SV=1	2	2	2	2	2	2	2	3.4	3.4	3.4	122.15	1071	1071;1083	0	4.4636	3.4	5723200	5723200	105990	105990	2				188	161;372	True;True	164;379	203;473	275;690	275;690	10	543
A0A9R0CZ56;A0A2H1VSE5;A0A9R0CZ85	A0A9R0CZ56;A0A2H1VSE5;A0A9R0CZ85	2;2;2	2;2;2	2;2;2			tr|A0A9R0CZ56|A0A9R0CZ56_SPOFR Retinoblastoma-binding protein 5 homolog isoform X2 OS=Spodoptera frugiperda OX=7108 GN=LOC118265628 PE=4 SV=1;tr|A0A2H1VSE5|A0A2H1VSE5_SPOFR SFRICE_001239 (Fragment) OS=Spodoptera frugiperda OX=7108 GN=SFRICE_001239 PE=4 SV=	3	2	2	2	2	2	2	4.4	4.4	4.4	52.942	476	476;481;482	0.0070522	1.3306	4.4	1109100	1109100	46214	46214	2				189	2325;2448	True;True	2356;2481	2948;3090	4539;4743	4539;4743
A0A2H1VSG8;A0A9R0EHC4;A0A9R0EHE6;A0A9R0CZB1;A0A9R0CZE7;A0A9R0EHU1;A0A9R0CZ69	A0A2H1VSG8;A0A9R0EHC4;A0A9R0EHE6;A0A9R0CZB1;A0A9R0CZE7;A0A9R0EHU1;A0A9R0CZ69	2;2;2;2;2;2;2	2;2;2;2;2;2;2	2;2;2;2;2;2;2			tr|A0A2H1VSG8|A0A2H1VSG8_SPOFR SFRICE_001238 OS=Spodoptera frugiperda OX=7108 GN=SFRICE_001238 PE=4 SV=1;tr|A0A9R0EHC4|A0A9R0EHC4_SPOFR Remodeling and spacing factor 1 isoform X6 OS=Spodoptera frugiperda OX=7108 GN=LOC118265625 PE=4 SV=1;tr|A0A9R0EHE6|A0A9	7	2	2	2	2	2	2	2.3	2.3	2.3	240.96	2199	2199;2300;2303;2303;2304;2305;2308	0	15.064	2.3	16620000	16620000	182640	182640	5				190	4871;4970	True;True	4950;5050	6298;6426	9602;9603;9604;9810;9811	9603;9811
A0A2H1VSG9	A0A2H1VSG9	8	8	8			tr|A0A2H1VSG9|A0A2H1VSG9_SPOFR Glucosidase 2 subunit beta OS=Spodoptera frugiperda OX=7108 GN=LOC118269710 PE=4 SV=1	1	8	8	8	8	8	8	15.8	15.8	15.8	59.726	526	526	0	29.066	15.8	269660000	269660000	12841000	12841000	7				191	427;810;2548;2764;3301;3564;3684;6002	True;True;True;True;True;True;True;True	434;820;2582;2801;3343;3612;3734;6098	543;1007;3215;3486;4171;4517;4707;7719	797;1507;4929;5325;6349;6880;7186;11767	797;1507;4929;5325;6349;6880;7186;11767
A0A9R0D9E4;A0A2H1VSI0	A0A9R0D9E4;A0A2H1VSI0	4;4	4;4	4;4			tr|A0A9R0D9E4|A0A9R0D9E4_SPOFR Uncharacterized protein LOC118272710 OS=Spodoptera frugiperda OX=7108 GN=LOC118272710 PE=4 SV=1;tr|A0A2H1VSI0|A0A2H1VSI0_SPOFR E3 ubiquitin-protein ligase OS=Spodoptera frugiperda OX=7108 GN=SFRICE_022351 PE=4 SV=1	2	4	4	4	4	4	4	18.3	18.3	18.3	24.716	219	219;411	0	7.7021	18.3	305110000	305110000	30511000	30511000	6				192	888;1513;2094;2970	True;True;True;True	899;1534;2121;3008	1107;1947;2636;3757	1654;1655;2995;3994;3995;5741	1655;2995;3994;5741
A0A2H1VSP1	A0A2H1VSP1	5	5	5			tr|A0A2H1VSP1|A0A2H1VSP1_SPOFR DNA replication licensing factor MCM6 OS=Spodoptera frugiperda OX=7108 GN=LOC118270792 PE=3 SV=1	1	5	5	5	5	5	5	7.4	7.4	7.4	91.64	819	819	0	5.3909	7.4	33368000	33368000	709950	709950	8				193	1040;2541;3717;4297;5959	True;True;True;True;True	1057;2575;3767;4366;6055	1317;3207;4744;4745;5544;7642	1986;1987;1988;4920;7233;7234;8407;11629	1986;4920;7234;8407;11629
A0A2H1VSV0;A0A9R0EH05;A0A9R0CXL6	A0A2H1VSV0;A0A9R0EH05;A0A9R0CXL6	19;19;18	19;19;18	19;19;18			tr|A0A2H1VSV0|A0A2H1VSV0_SPOFR Serine hydroxymethyltransferase OS=Spodoptera frugiperda OX=7108 GN=SFRICE_011448 PE=3 SV=1;tr|A0A9R0EH05|A0A9R0EH05_SPOFR Serine hydroxymethyltransferase OS=Spodoptera frugiperda OX=7108 GN=LOC118264377 PE=3 SV=1;tr|A0A9R0CX	3	19	19	19	19	19	19	59.8	59.8	59.8	51.335	465	465;465;517	0	153.12	59.8	1358800000	1358800000	56616000	56616000	35				194	185;198;1067;2434;2477;2478;2501;2926;3122;3178;3339;4206;4260;4755;5016;5599;5984;6029;6030	True;True;True;True;True;True;True;True;True;True;True;True;True;True;True;True;True;True;True	189;202;1084;2467;2510;2511;2535;2963;3162;3219;3381;4275;4329;4831;5098;5687;6080;6125;6126	249;264;1351;3076;3129;3130;3156;3157;3158;3704;3943;4011;4219;4220;5401;5466;6148;6488;7198;7669;7752;7753;7754	374;394;395;2033;4725;4795;4796;4834;4835;4836;4837;4838;5668;5669;5670;6023;6115;6415;6416;6417;6418;6419;6420;8175;8264;9364;9908;10982;11667;11817;11818;11819;11820;11821;11822	374;395;2033;4725;4795;4796;4836;5668;6023;6115;6418;8175;8264;9364;9908;10982;11667;11818;11821
A0A9R0EIH4;A0A2H1VTJ8	A0A9R0EIH4;A0A2H1VTJ8	14;14	14;14	14;14			tr|A0A9R0EIH4|A0A9R0EIH4_SPOFR Leucine-rich repeat flightless-interacting protein 2 OS=Spodoptera frugiperda OX=7108 GN=LOC118267116 PE=3 SV=1;tr|A0A2H1VTJ8|A0A2H1VTJ8_SPOFR SFRICE_000991 OS=Spodoptera frugiperda OX=7108 GN=SFRICE_000991 PE=3 SV=1	2	14	14	14	14	14	14	30.2	30.2	30.2	54.9	494	494;494	0	98.199	30.2	1332400000	1332400000	70129000	70129000	24				195	36;110;369;476;603;695;1016;2298;2936;3005;3442;4197;4213;5358	True;True;True;True;True;True;True;True;True;True;True;True;True;True	36;113;376;483;611;704;1033;2328;2973;3043;3487;4266;4282;5441	43;143;144;469;604;753;876;1291;2911;2912;3716;3717;3797;4372;5391;5408;6896;6897	54;55;205;206;207;208;686;883;1118;1299;1949;4480;4481;4482;5683;5684;5685;5803;5804;6679;8162;8182;10528;10529;10530	54;208;686;883;1118;1299;1949;4482;5685;5804;6679;8162;8182;10530
A0A2H1VTU6	A0A2H1VTU6	5	5	5			tr|A0A2H1VTU6|A0A2H1VTU6_SPOFR Prefoldin subunit 6 OS=Spodoptera frugiperda OX=7108 GN=LOC118269673 PE=3 SV=1	1	5	5	5	5	5	5	43.4	43.4	43.4	14.087	122	122	0	26.897	43.4	240430000	240430000	30054000	30054000	7				196	3171;4215;4223;4348;4404	True;True;True;True;True	3212;4284;4292;4419;4475	4001;5410;5418;5619;5686	6101;8185;8196;8509;8510;8597;8598	6101;8185;8196;8509;8597
A0A2H1VTV2;A0A9R0EXF0	A0A2H1VTV2;A0A9R0EXF0	5;5	5;5	5;5			tr|A0A2H1VTV2|A0A2H1VTV2_SPOFR SFRICE_008973 (Fragment) OS=Spodoptera frugiperda OX=7108 GN=SFRICE_008973 PE=4 SV=1;tr|A0A9R0EXF0|A0A9R0EXF0_SPOFR Clathrin heavy chain OS=Spodoptera frugiperda OX=7108 GN=LOC118274453 PE=3 SV=1	2	5	5	5	5	5	5	5	5	5	152.33	1328	1328;1683	0	6.0133	5	17734000	17734000	224490	224490	5				197	158;3274;3986;4019;5433	True;True;True;True;True	161;3316;4045;4081;5520	200;4125;5117;5162;7001	272;6272;7780;7840;10692	272;6272;7780;7840;10692
A0A9R0EM40;A0A9R0DQH6;A0A2H1VU62;E9KGH7	A0A9R0EM40;A0A9R0DQH6;A0A2H1VU62;E9KGH7	7;7;7;4	7;7;7;4	7;7;7;4			tr|A0A9R0EM40|A0A9R0EM40_SPOFR Glucosamine-6-phosphate isomerase OS=Spodoptera frugiperda OX=7108 GN=LOC118271259 PE=3 SV=1;tr|A0A9R0DQH6|A0A9R0DQH6_SPOFR Glucosamine-6-phosphate isomerase OS=Spodoptera frugiperda OX=7108 GN=LOC118271259 PE=3 SV=1;tr|A0A2H	4	7	7	7	7	7	7	32.8	32.8	32.8	30.341	271	271;278;302;176	0	15.472	32.8	239260000	239260000	19938000	19938000	9				198	785;1382;1467;2099;2610;5081;6024	True;True;True;True;True;True;True	794;1403;1488;2126;2645;5163;6120	978;1789;1790;1895;2650;2651;3296;6563;7747	1466;2749;2750;2929;4016;4017;5047;5048;10017;11809;11810;11811	1466;2750;2929;4016;5047;10017;11810
A0A2H1VU95;A0A9R0D7K1;A0A9R0ELP5	A0A2H1VU95;A0A9R0D7K1;A0A9R0ELP5	7;7;7	7;7;7	7;7;7			tr|A0A2H1VU95|A0A2H1VU95_SPOFR SFRICE_013512 OS=Spodoptera frugiperda OX=7108 GN=SFRICE_013512 PE=4 SV=1;tr|A0A9R0D7K1|A0A9R0D7K1_SPOFR E3 ubiquitin-protein ligase TRIM33 isoform X2 OS=Spodoptera frugiperda OX=7108 GN=LOC118271257 PE=4 SV=1;tr|A0A9R0ELP5|A	3	7	7	7	7	7	7	9.7	9.7	9.7	101.93	956	956;956;962	0	8.7066	9.7	51793000	51793000	1263200	1263200	6				199	358;405;450;3317;4475;4815;5529	True;True;True;True;True;True;True	364;412;457;3359;4547;4892;5616	456;512;571;4193;5780;6226;7117	672;746;838;6376;8747;9483;10866	672;746;838;6376;8747;9483;10866
A0A2H1VUC4;A0A9R0DB57	A0A2H1VUC4;A0A9R0DB57	9;9	9;9	9;9			tr|A0A2H1VUC4|A0A2H1VUC4_SPOFR Phosphatidylinositol 3-kinase catalytic subunit type 3 (Fragment) OS=Spodoptera frugiperda OX=7108 GN=SFRICE_003455 PE=3 SV=1;tr|A0A9R0DB57|A0A9R0DB57_SPOFR Phosphatidylinositol 3-kinase catalytic subunit type 3 OS=Spodoptera	2	9	9	9	9	9	9	15.7	15.7	15.7	96.192	843	843;920	0	16.143	15.7	76132000	76132000	1770500	1770500	13				200	256;442;496;1534;1622;2148;3493;4219;4392	True;True;True;True;True;True;True;True;True	260;449;503;1555;1643;2175;3539;4288;4463	335;560;625;1972;2073;2714;4433;5414;5672	488;819;820;916;917;3024;3025;3160;4141;6769;6770;8192;8578	488;820;916;3024;3160;4141;6770;8192;8578
A0A2H1VUF5	A0A2H1VUF5	3	3	3			tr|A0A2H1VUF5|A0A2H1VUF5_SPOFR Aminoacyl tRNA synthase complex-interacting multifunctional protein 1 OS=Spodoptera frugiperda OX=7108 GN=LOC118276250 PE=4 SV=1	1	3	3	3	3	3	3	12.5	12.5	12.5	32.218	295	295	0	6.9444	12.5	50675000	50675000	2667100	2667100	3				201	1330;2378;2455	True;True;True	1351;2409;2488	1724;3010;3102	2646;4639;4762	2646;4639;4762
A0A2H1VUK5;A0A1S6Q5K5	A0A2H1VUK5;A0A1S6Q5K5	2;1	2;1	2;1			tr|A0A2H1VUK5|A0A2H1VUK5_SPOFR Proteasome subunit beta OS=Spodoptera frugiperda OX=7108 GN=LOC118274000 PE=3 SV=1;tr|A0A1S6Q5K5|A0A1S6Q5K5_SPOFR Proteasome subunit beta type-3 (Fragment) OS=Spodoptera frugiperda OX=7108 PE=2 SV=1	2	2	2	2	2	2	2	13.2	13.2	13.2	23.021	205	205;147	0	5.2416	13.2	34890000	34890000	4984300	4984300	1				202	1484;5002	True;True	1505;5084	1913;6473	2952;9882	2952;9882
A0A2H1VUL5;A0A9R0ERF2;A0A9R0DX18	A0A2H1VUL5;A0A9R0ERF2;A0A9R0DX18	2;2;1	2;2;1	2;2;1			tr|A0A2H1VUL5|A0A2H1VUL5_SPOFR SFRICE_020304 (Fragment) OS=Spodoptera frugiperda OX=7108 GN=SFRICE_020304 PE=3 SV=1;tr|A0A9R0ERF2|A0A9R0ERF2_SPOFR Nuclear speckle splicing regulatory protein 1 isoform X1 OS=Spodoptera frugiperda OX=7108 GN=LOC118277835 PE=	3	2	2	2	2	2	2	5	5	5	42.509	361	361;361;312	0.008427	1.304	5	21277000	21277000	1182100	1182100	4				203	1835;5616	True;True	1860;5704	2327;7218	3543;3544;3545;11005	3543;11005
A0A2H1VUZ4;A0A9R0CZR9	A0A2H1VUZ4;A0A9R0CZR9	6;6	6;6	6;6			tr|A0A2H1VUZ4|A0A2H1VUZ4_SPOFR SFRICE_000874 OS=Spodoptera frugiperda OX=7108 GN=SFRICE_000874 PE=3 SV=1;tr|A0A9R0CZR9|A0A9R0CZR9_SPOFR Nucleoporin SEH1 OS=Spodoptera frugiperda OX=7108 GN=LOC118266048 PE=3 SV=1	2	6	6	6	6	6	6	28.7	28.7	28.7	37.703	341	341;378	0	10.55	28.7	47356000	47356000	2255000	2255000	6				204	833;2313;2678;5387;5678;5721	True;True;True;True;True;True	843;2343;2714;5472;5767;5810	1032;2929;3382;6949;7300;7348	1543;4506;5172;5173;5174;10624;11140;11211	1543;4506;5173;10624;11140;11211
A0A9R0DA39;A0A2H1VVD0	A0A9R0DA39;A0A2H1VVD0	3;3	3;3	3;3			tr|A0A9R0DA39|A0A9R0DA39_SPOFR tRNA-dihydrouridine(47) synthase [NAD(P)(+)] OS=Spodoptera frugiperda OX=7108 GN=LOC118273146 PE=3 SV=1;tr|A0A2H1VVD0|A0A2H1VVD0_SPOFR tRNA-dihydrouridine(47) synthase [NAD(P)(+)] OS=Spodoptera frugiperda OX=7108 GN=SFRICE_00	2	3	3	3	3	3	3	6.8	6.8	6.8	70.828	619	619;619	0	6.6712	6.8	19659000	19659000	561690	561690	4				205	2571;3340;3636	True;True;True	2606;3382;3685	3246;4221;4647	4965;6421;7106;7107	4965;6421;7106
A0A2H1VVJ7	A0A2H1VVJ7	3	3	3			tr|A0A2H1VVJ7|A0A2H1VVJ7_SPOFR T-complex protein 1 subunit gamma OS=Spodoptera frugiperda OX=7108 GN=LOC118274007 PE=3 SV=1	1	3	3	3	3	3	3	6.1	6.1	6.1	59.043	539	539	0	4.936	6.1	7800100	7800100	229420	229420	4				206	542;2391;4952	True;True;True	549;2422;5032	681;3025;6403	1016;4657;4658;9785	1016;4657;9785
A0A2H1VVK9	A0A2H1VVK9	13	13	13			tr|A0A2H1VVK9|A0A2H1VVK9_SPOFR Ras suppressor protein 1 OS=Spodoptera frugiperda OX=7108 GN=LOC118268561 PE=4 SV=1	1	13	13	13	13	13	13	66.7	66.7	66.7	31.706	285	285	0	50.246	66.7	197850000	197850000	12366000	12366000	22				207	361;1192;1259;1755;1868;2456;2557;3012;3113;3461;3614;3983;3985	True;True;True;True;True;True;True;True;True;True;True;True;True	367;1211;1280;1779;1893;2489;2592;3050;3153;3506;3663;4042;4044	459;1546;1637;2237;2362;3103;3226;3804;3928;3929;4391;4624;4625;5114;5116	675;2346;2501;3395;3591;4763;4764;4941;4942;4943;5813;6001;6002;6702;7070;7071;7072;7073;7074;7776;7777;7779	675;2346;2501;3395;3591;4763;4943;5813;6002;6702;7072;7777;7779
A0A2H1VVN0;A0A9R0D8A0	A0A2H1VVN0;A0A9R0D8A0	3;2	3;2	3;2			tr|A0A2H1VVN0|A0A2H1VVN0_SPOFR Enoyl-[acyl-carrier-protein] reductase, mitochondrial OS=Spodoptera frugiperda OX=7108 GN=SFRICE_001181 PE=3 SV=1;tr|A0A9R0D8A0|A0A9R0D8A0_SPOFR Enoyl-[acyl-carrier-protein] reductase, mitochondrial OS=Spodoptera frugiperda O	2	3	3	3	3	3	3	3.4	3.4	3.4	142.49	1278	1278;645	0	8.0501	3.4	84718000	84718000	1210300	1210300	3				208	3018;4310;5492	True;True;True	3056;4379;5579	3814;5564;7073	5825;8435;10807	5825;8435;10807
A0A2H1VVP8;A0A9R0F462;A0A9R0DHJ0	A0A2H1VVP8;A0A9R0F462;A0A9R0DHJ0	2;2;2	2;2;2	2;2;2			tr|A0A2H1VVP8|A0A2H1VVP8_SPOFR Eukaryotic peptide chain release factor subunit 1 (Fragment) OS=Spodoptera frugiperda OX=7108 GN=SFRICE_030043 PE=3 SV=1;tr|A0A9R0F462|A0A9R0F462_SPOFR Eukaryotic peptide chain release factor subunit 1 OS=Spodoptera frugiperd	3	2	2	2	2	2	2	9.5	9.5	9.5	44.679	401	401;435;437	0	8.3818	9.5	14311000	14311000	596280	596280	3				209	3569;5870	True;True	3617;5963	4522;7527	6885;6886;11461	6886;11461
Q962T2;A0A2H1VVZ9	Q962T2;A0A2H1VVZ9	3;3	3;3	3;3			sp|Q962T2|RL28_SPOFR Large ribosomal subunit protein eL28 OS=Spodoptera frugiperda OX=7108 GN=RpL28 PE=2 SV=1;tr|A0A2H1VVZ9|A0A2H1VVZ9_SPOFR Large ribosomal subunit protein eL28 OS=Spodoptera frugiperda OX=7108 GN=LOC118270893 PE=3 SV=1	2	3	3	3	3	3	3	20.1	20.1	20.1	15.933	139	139;139	0	3.2501	20.1	25578000	25578000	4263100	4263100	3				210	563;1768;4827	True;True;True	571;1792;4905	706;2252;6247	1056;3421;9521	1056;3421;9521
A0A2H1WC57;A0A2H1VW16;A0A9R0DFR1	A0A2H1WC57;A0A2H1VW16;A0A9R0DFR1	1;1;1	1;1;1	1;1;1			tr|A0A2H1WC57|A0A2H1WC57_SPOFR acetyl-CoA C-acyltransferase (Fragment) OS=Spodoptera frugiperda OX=7108 GN=SFRICE_024330 PE=3 SV=1;tr|A0A2H1VW16|A0A2H1VW16_SPOFR SFRICE_007292 OS=Spodoptera frugiperda OX=7108 GN=SFRICE_007292 PE=3 SV=1;tr|A0A9R0DFR1|A0A9R0	3	1	1	1	1	1	1	6.1	6.1	6.1	40.508	377	377;410;474	0	3.8162	6.1	445330	445330	24741	24741	1				211	766	TRUE	775	957	1437	1437
A0A2H1VWC5	A0A2H1VWC5	27	1	1			tr|A0A2H1VWC5|A0A2H1VWC5_SPOFR SFRICE_019544 (Fragment) OS=Spodoptera frugiperda OX=7108 GN=SFRICE_019544 PE=4 SV=1	1	27	1	1	27	1	1	47.9	4.1	4.1	83.758	737	737	0	27.846	47.9	273060000	273060000	6350200	6350200	4				212	349;891;911;955;1061;1276;1282;1672;1782;1935;2203;2608;2724;2725;3092;3264;3437;3441;3645;4331;4931;4942;5040;5076;5129;5144;5880	False;False;False;True;False;False;False;False;False;False;False;False;False;False;False;False;False;False;False;False;False;False;False;False;False;False;False	354;902;922;968;1078;1297;1303;1695;1806;1961;2231;2643;2760;2761;3131;3306;3482;3486;3694;4401;4402;5011;5022;5122;5158;5212;5227;5973	442;1110;1132;1133;1183;1184;1343;1655;1667;2131;2267;2446;2783;2784;3293;3294;3437;3438;3903;4113;4367;4371;4658;4659;5597;5598;5599;6375;6389;6516;6557;6614;6632;7543	646;647;1658;1689;1690;1760;1761;1762;1763;2024;2525;2557;3245;3447;3448;3717;4265;4266;5043;5044;5045;5254;5255;5956;6256;6670;6671;6672;6673;6678;7124;7125;8482;8483;8484;8485;9740;9762;9948;10011;10087;10088;10114;10115;10116;11487;11488;11489	646;1658;1690;1763;2024;2525;2557;3245;3448;3717;4266;5044;5254;5255;5956;6256;6671;6678;7124;8483;9740;9762;9948;10011;10087;10115;11488	11	241
A0A2H1VWS0;A0A9R0DCX0;A0A9R0DCY4	A0A2H1VWS0;A0A9R0DCX0;A0A9R0DCY4	1;1;1	1;1;1	1;1;1			tr|A0A2H1VWS0|A0A2H1VWS0_SPOFR Serine/threonine-protein phosphatase (Fragment) OS=Spodoptera frugiperda OX=7108 GN=SFRICE_019436 PE=3 SV=1;tr|A0A9R0DCX0|A0A9R0DCX0_SPOFR Serine/threonine-protein phosphatase OS=Spodoptera frugiperda OX=7108 GN=LOC118274918	3	1	1	1	1	1	1	12.5	12.5	12.5	15.732	136	136;328;331	0.0014684	1.6097	12.5	375070	375070	46884	46884	1				213	1138	TRUE	1155	1439	2187	2187
A0A2H1VWS9;A0A9R0E4Z5;A0A9R0E624;A0A9R0E5I5;A0A9R0E4Z2;A0A9R0E6L3;A0A2H1V7H9	A0A2H1VWS9;A0A9R0E4Z5;A0A9R0E624;A0A9R0E5I5;A0A9R0E4Z2;A0A9R0E6L3;A0A2H1V7H9	3;3;3;3;3;3;2	3;3;3;3;3;3;2	3;3;3;3;3;3;2			tr|A0A2H1VWS9|A0A2H1VWS9_SPOFR SFRICE_012032 (Fragment) OS=Spodoptera frugiperda OX=7108 GN=SFRICE_012032 PE=3 SV=1;tr|A0A9R0E4Z5|A0A9R0E4Z5_SPOFR Uncharacterized protein LOC118278690 isoform X5 OS=Spodoptera frugiperda OX=7108 GN=LOC118278690 PE=3 SV=1;tr	7	3	3	3	3	3	3	6	6	6	64.554	583	583;1813;1814;1821;1821;1822;226	0	3.7603	6	32180000	32180000	1038100	1038100	3				214	1905;5373;5415	True;True;True	1930;5457;5501	2402;6931;6979	3648;10603;10660	3648;10603;10660
A0A2H1VXB2	A0A2H1VXB2	3	3	3			tr|A0A2H1VXB2|A0A2H1VXB2_SPOFR Prefoldin subunit 4 OS=Spodoptera frugiperda OX=7108 GN=LOC126910662 PE=3 SV=1	1	3	3	3	3	3	3	28.9	28.9	28.9	15.322	135	135	0	10.444	28.9	201920000	201920000	33654000	33654000	3				215	1490;1972;5338	True;True;True	1511;1998;5421	1920;2492;6872	2960;3782;10491	2960;3782;10491
A0A2H1VXE0;A0A9R0F720	A0A2H1VXE0;A0A9R0F720	1;1	1;1	1;1			tr|A0A2H1VXE0|A0A2H1VXE0_SPOFR SFRICE_013522 OS=Spodoptera frugiperda OX=7108 GN=SFRICE_013522 PE=4 SV=1;tr|A0A9R0F720|A0A9R0F720_SPOFR N-acyl-aliphatic-L-amino acid amidohydrolase OS=Spodoptera frugiperda OX=7108 GN=LOC118276201 PE=3 SV=1	2	1	1	1	1	1	1	4	4	4	22.371	200	200;398	0.0095498	1.1779	4	41584000	41584000	4158400	4158400	1				216	2253	TRUE	2282	2858	4413	4413
A0A2H1VXJ0	A0A2H1VXJ0	6	6	6			tr|A0A2H1VXJ0|A0A2H1VXJ0_SPOFR Protein LSM12 OS=Spodoptera frugiperda OX=7108 GN=LOC118280930 PE=4 SV=1	1	6	6	6	6	6	6	34.4	34.4	34.4	21.531	189	189	0	21.833	34.4	1113600000	1113600000	101230000	101230000	13				217	920;1393;3054;5348;5453;5797	True;True;True;True;True;True	931;1414;3093;5431;5540;5887	1143;1805;1806;3856;6882;7025;7440	1704;2772;2773;2774;2775;2776;2777;5886;10509;10510;10723;11329;11330	1704;2777;5886;10510;10723;11329
A0A9R0ENH2;A0A9R0EMF8;A0A2H1VXT0;A0A9R0D9Y3	A0A9R0ENH2;A0A9R0EMF8;A0A2H1VXT0;A0A9R0D9Y3	6;6;6;6	6;6;6;6	6;6;6;6			tr|A0A9R0ENH2|A0A9R0ENH2_SPOFR Stathmin-4 isoform X3 OS=Spodoptera frugiperda OX=7108 GN=LOC118273070 PE=4 SV=1;tr|A0A9R0EMF8|A0A9R0EMF8_SPOFR Uncharacterized protein LOC118273070 isoform X2 OS=Spodoptera frugiperda OX=7108 GN=LOC118273070 PE=4 SV=1;tr|A0A	4	6	6	6	6	6	6	23.9	23.9	23.9	33.208	289	289;292;318;336	0	70.437	23.9	206180000	206180000	11454000	11454000	9				218	1033;1783;3205;3323;3544;4577	True;True;True;True;True;True	1050;1807;3247;3365;3592;4652	1309;2268;4045;4046;4200;4495;5913	1975;3449;6158;6159;6160;6383;6852;8957;8958	1975;3449;6160;6383;6852;8958
A0A2H1VY06;A0A9R0DH27;Q8ISR3	A0A2H1VY06;A0A9R0DH27;Q8ISR3	2;2;1	2;2;1	2;2;1			tr|A0A2H1VY06|A0A2H1VY06_SPOFR Ribosomal protein L19 OS=Spodoptera frugiperda OX=7108 GN=SFRICE_022340 PE=3 SV=1;tr|A0A9R0DH27|A0A9R0DH27_SPOFR Ribosomal protein L19 OS=Spodoptera frugiperda OX=7108 GN=LOC118277782 PE=3 SV=1;tr|Q8ISR3|Q8ISR3_SPOFR Ribosoma	3	2	2	2	2	2	2	8.9	8.9	8.9	35.547	302	302;200;80	0	26.912	8.9	27645000	27645000	1974600	1974600	2				219	2713;5784	True;True	2749;5874	3421;7426	5232;11307	5232;11307
A0A2H1VY60;A0A9R0DXN4;A0A9R0DYY9;A0A9R0DY86;A0A9R0DXL5;A0A9R0DXM4	A0A2H1VY60;A0A9R0DXN4;A0A9R0DYY9;A0A9R0DY86;A0A9R0DXL5;A0A9R0DXM4	1;1;1;1;1;1	1;1;1;1;1;1	1;1;1;1;1;1			tr|A0A2H1VY60|A0A2H1VY60_SPOFR SFRICE_006961 (Fragment) OS=Spodoptera frugiperda OX=7108 GN=SFRICE_006961 PE=4 SV=1;tr|A0A9R0DXN4|A0A9R0DXN4_SPOFR Uncharacterized protein LOC118280717 isoform X10 OS=Spodoptera frugiperda OX=7108 GN=LOC118280717 PE=4 SV=1;t	6	1	1	1	1	1	1	0.6	0.6	0.6	204.3	1872	1872;2170;2664;2667;2673;2674	0.0097629	1.2714	0.6	3220100	3220100	33542	33542	4				220	175	TRUE	179	234	343;344;345;346	345
A0A9R0CTH5;A0A2H1VY70	A0A9R0CTH5;A0A2H1VY70	2;2	2;2	2;2			tr|A0A9R0CTH5|A0A9R0CTH5_SPOFR Coatomer subunit gamma OS=Spodoptera frugiperda OX=7108 GN=LOC118261860 PE=3 SV=1;tr|A0A2H1VY70|A0A2H1VY70_SPOFR Coatomer subunit gamma OS=Spodoptera frugiperda OX=7108 GN=SFRICE_023703 PE=3 SV=1	2	2	2	2	2	2	2	3.1	3.1	3.1	94.768	861	861;861	0	4.8586	3.1	380040	380040	9048.5	9048.5	3				221	9;4943	True;True	9;5023	11;12;6390	16;17;9763	16;9763
A0A2H1VYE4	A0A2H1VYE4	2	2	2			tr|A0A2H1VYE4|A0A2H1VYE4_SPOFR Acidic leucine-rich nuclear phosphoprotein 32 family member B OS=Spodoptera frugiperda OX=7108 GN=LOC118265409 PE=4 SV=1	1	2	2	2	2	2	2	15.7	15.7	15.7	12.545	115	115	0	127.6	15.7	95521000	95521000	95521000	95521000	2				222	4863;4864	True;True	4942;4943	6290;6291	9588;9589	9588;9589
A0A9R0EDE2;A0A2H1VYF8	A0A9R0EDE2;A0A2H1VYF8	1;1	1;1	1;1			tr|A0A9R0EDE2|A0A9R0EDE2_SPOFR Sodium-coupled neutral amino acid transporter 10 OS=Spodoptera frugiperda OX=7108 GN=LOC118272374 PE=4 SV=1;tr|A0A2H1VYF8|A0A2H1VYF8_SPOFR SFRICE_001102 OS=Spodoptera frugiperda OX=7108 GN=SFRICE_001102 PE=4 SV=1	2	1	1	1	1	1	1	1.1	1.1	1.1	107.75	980	980;1758	0.0014881	1.7065	1.1	342190000	342190000	8147500	8147500	1				223	2604	TRUE	2639	3288	5038	5038
X4ZE67;A0A2H1VYJ7;A0A9R0DG10;A0A9R0EQJ8	X4ZE67;A0A2H1VYJ7;A0A9R0DG10;A0A9R0EQJ8	5;5;5;5	5;5;5;5	5;5;5;5			tr|X4ZE67|X4ZE67_SPOFR Actin-related protein Arp2 (Fragment) OS=Spodoptera frugiperda OX=7108 GN=ARP2 PE=2 SV=1;tr|A0A2H1VYJ7|A0A2H1VYJ7_SPOFR Actin-related protein 2 isoform X3 OS=Spodoptera frugiperda OX=7108 GN=LOC118276877 PE=2 SV=1;tr|A0A9R0DG10|A0A9R	4	5	5	5	5	5	5	20.1	20.1	20.1	44.88	394	394;394;399;404	0	16.261	20.1	113330000	113330000	7555100	7555100	5				224	644;2032;2135;2451;4107	True;True;True;True;True	652;2058;2162;2484;4173	808;2560;2696;3096;5262	1206;3875;4079;4754;7987	1206;3875;4079;4754;7987
A0A2H1VYT8;A0A9R0E7P2;A0A9R0E8X3	A0A2H1VYT8;A0A9R0E7P2;A0A9R0E8X3	15;15;13	15;15;13	15;15;13			tr|A0A2H1VYT8|A0A2H1VYT8_SPOFR acylaminoacyl-peptidase OS=Spodoptera frugiperda OX=7108 GN=SFRICE_008202 PE=4 SV=1;tr|A0A9R0E7P2|A0A9R0E7P2_SPOFR acylaminoacyl-peptidase OS=Spodoptera frugiperda OX=7108 GN=LOC118264495 PE=4 SV=1;tr|A0A9R0E8X3|A0A9R0E8X3_SP	3	15	15	15	15	15	15	24.3	24.3	24.3	89.411	815	815;710;710	0	41.105	24.3	719150000	719150000	16724000	16724000	24				225	435;1610;1729;1926;1963;2673;2681;2944;2977;3370;3487;3590;4596;4918;5638	True;True;True;True;True;True;True;True;True;True;True;True;True;True;True	442;1631;1753;1951;1989;2709;2717;2981;3015;3413;3533;3639;4671;4998;5726	552;553;2059;2203;2425;2481;3376;3385;3726;3766;4294;4427;4599;5958;6357;7242;7243	809;810;811;3133;3134;3338;3685;3764;5162;5163;5177;5696;5751;5752;6567;6568;6759;6760;7040;9092;9708;9709;11037;11038	811;3133;3338;3685;3764;5163;5177;5696;5752;6568;6759;7040;9092;9709;11037
A0A2H1VZ07;A0A9R0F3G5	A0A2H1VZ07	3;1	3;1	3;1			tr|A0A2H1VZ07|A0A2H1VZ07_SPOFR SFRICE_000112 OS=Spodoptera frugiperda OX=7108 GN=SFRICE_000112 PE=3 SV=1	2	3	3	3	3	3	3	2.3	2.3	2.3	149.15	1361	1361;1330	0	3.2983	2.3	82571000	82571000	1131100	1131100	3				226	1;2423;4173	True;True;True	1;2456;4241	1;3065;5356	1;4712;8119	1;4712;8119
A0A2H1VZ91;A0A5Q0TYT9;A0A9R0DLW5	A0A2H1VZ91;A0A5Q0TYT9;A0A9R0DLW5	1;1;1	1;1;1	1;1;1			tr|A0A2H1VZ91|A0A2H1VZ91_SPOFR SFRICE041989.2 (Fragment) OS=Spodoptera frugiperda OX=7108 GN=SFRICE041989.2 PE=4 SV=1;tr|A0A5Q0TYT9|A0A5Q0TYT9_SPOFR glutathione transferase OS=Spodoptera frugiperda OX=7108 PE=2 SV=1;tr|A0A9R0DLW5|A0A9R0DLW5_SPOFR glutathio	3	1	1	1	1	1	1	15	15	15	11.381	100	100;204;410	0.0096819	1.2425	15	1262200	1262200	210370	210370	1				227	4065	TRUE	4129	5214	7911	7911
A0A2H1VZ97;A0A9R0EJ91	A0A2H1VZ97;A0A9R0EJ91	16;16	16;16	16;16			tr|A0A2H1VZ97|A0A2H1VZ97_SPOFR SFRICE_014874 OS=Spodoptera frugiperda OX=7108 GN=SFRICE_014874 PE=4 SV=1;tr|A0A9R0EJ91|A0A9R0EJ91_SPOFR Elongation factor 1-gamma OS=Spodoptera frugiperda OX=7108 GN=LOC118267505 PE=4 SV=1	2	16	16	16	16	16	16	40.4	40.4	40.4	49.587	441	441;443	0	52.292	40.4	1374300000	1374300000	57263000	57263000	36				228	186;257;303;1441;1971;2797;2989;4132;4505;4659;4999;5313;5392;5511;5544;5629	True;True;True;True;True;True;True;True;True;True;True;True;True;True;True;True	190;261;307;1462;1997;2834;3027;4199;4578;4734;5081;5396;5477;5478;5598;5631;5717	250;336;386;1863;2490;2491;3528;3529;3780;5295;5296;5819;6028;6469;6846;6954;6955;7098;7135;7136;7233	375;489;556;557;558;2860;3779;3780;3781;5411;5412;5773;5774;5775;5776;5777;8029;8030;8805;8806;8807;9194;9195;9876;10454;10455;10456;10631;10632;10843;10894;10895;10896;10897;10898;10899;11027	375;489;557;2860;3779;5411;5775;8029;8805;9194;9876;10455;10631;10843;10895;11027	12	342
A0A2H1VZ98;A0A9R0DMG5;A0A9R0EU97	A0A2H1VZ98;A0A9R0DMG5;A0A9R0EU97	1;1;1	1;1;1	1;1;1			tr|A0A2H1VZ98|A0A2H1VZ98_SPOFR glutathione transferase (Fragment) OS=Spodoptera frugiperda OX=7108 GN=SFRICE027725.2 PE=3 SV=1;tr|A0A9R0DMG5|A0A9R0DMG5_SPOFR glutathione transferase OS=Spodoptera frugiperda OX=7108 GN=LOC118271777 PE=3 SV=1;tr|A0A9R0EU97|A	3	1	1	1	1	1	1	6.9	6.9	6.9	23.184	204	204;204;211	0.0015314	1.9434	6.9	2091900	2091900	139460	139460	1				229	5146	TRUE	5229	6634	10118	10118
A0A2H1VZH4;A0A9R0E4L4;A0A9R0F0N9;A0A9R0E3S6;A0A9R0E4L5	A0A2H1VZH4;A0A9R0E4L4;A0A9R0F0N9;A0A9R0E3S6;A0A9R0E4L5	1;1;1;1;1	1;1;1;1;1	1;1;1;1;1			tr|A0A2H1VZH4|A0A2H1VZH4_SPOFR SFRICE_024271 (Fragment) OS=Spodoptera frugiperda OX=7108 GN=SFRICE_024271 PE=3 SV=1;tr|A0A9R0E4L4|A0A9R0E4L4_SPOFR Cullin-1 isoform X4 OS=Spodoptera frugiperda OX=7108 GN=LOC118279685 PE=3 SV=1;tr|A0A9R0F0N9|A0A9R0F0N9_SPOFR	5	1	1	1	1	1	1	3.9	3.9	3.9	56.048	489	489;788;789;794;795	0.0014728	1.6338	3.9	393780	393780	14584	14584	1				230	4024	TRUE	4086	5167	7847	7847
A0A2H1VZJ0;A0A2H1W5M3;A0A9R0D3Y5;A0A9R0F6F1;A0A9R0CYT8;A0A2H1VX41	A0A2H1VZJ0;A0A2H1W5M3;A0A9R0D3Y5	28;15;15;1;1;1	25;12;12;0;0;0	4;2;3;0;0;0			tr|A0A2H1VZJ0|A0A2H1VZJ0_SPOFR SFRICE_015281 OS=Spodoptera frugiperda OX=7108 GN=SFRICE_015281 PE=3 SV=1;tr|A0A2H1W5M3|A0A2H1W5M3_SPOFR SFRICE_020115 OS=Spodoptera frugiperda OX=7108 GN=SFRICE_020115 PE=3 SV=1;tr|A0A9R0D3Y5|A0A9R0D3Y5_SPOFR Aldehyde dehydr	6	28	25	4	28	25	4	48.1	44	9.8	103.1	962	962;472;486;488;488;491	0	306.05	48.1	10036000000	10036000000	185860000	185860000	82				231	1068;1252;1444;1445;1602;1603;2023;2216;2732;3046;3072;3191;3192;4129;4494;4991;4994;5213;5278;5331;5425;5530;5676;5698;5704;5867;5868;5913	False;True;True;True;True;True;True;True;True;True;True;True;True;True;False;True;True;True;True;True;True;True;True;True;False;True;True;True	1085;1273;1465;1466;1623;1624;2049;2244;2768;2769;3085;3111;3233;3234;4196;4566;5072;5076;5296;5361;5414;5511;5512;5617;5765;5787;5793;5960;5961;6006;6007	1352;1629;1630;1866;1867;2051;2052;2550;2803;2804;2805;2806;2807;3447;3448;3847;3879;4026;4027;4028;5290;5291;5804;6454;6460;6461;6724;6806;6807;6865;6991;6992;7118;7294;7295;7296;7297;7323;7324;7331;7524;7525;7584;7585;7586	2034;2035;2036;2037;2038;2039;2485;2486;2487;2488;2489;2490;2491;2492;2493;2494;2863;2864;2865;3120;3121;3122;3123;3124;3862;4301;4302;4303;4304;4305;4306;4307;4308;4309;4310;4311;4312;4313;4314;4315;4316;5267;5268;5269;5870;5871;5872;5918;5919;6132;6133;6134;6135;8023;8024;8025;8785;9851;9866;9867;10262;10401;10402;10484;10679;10680;10681;10867;10868;10869;11117;11118;11119;11120;11121;11122;111…	2037;2486;2864;2865;3122;3123;3862;4314;5268;5870;5918;6132;6135;8024;8785;9851;9866;10262;10402;10484;10681;10867;11118;11173;11184;11458;11459;11558	13;14;15	83;100;336
A0A2H1VZL9	A0A2H1VZL9	5	5	5			tr|A0A2H1VZL9|A0A2H1VZL9_SPOFR Prefoldin subunit 3 OS=Spodoptera frugiperda OX=7108 GN=LOC118276432 PE=3 SV=1	1	5	5	5	5	5	5	39	39	39	20.905	182	182	0	24.685	39	312380000	312380000	24029000	24029000	10				232	2164;3299;3959;5265;5798	True;True;True;True;True	2191;3341;4018;5348;5888	2733;4169;5083;5084;5085;6792;7441	4182;6347;7730;7731;7732;7733;7734;10382;10383;11331	4182;6347;7734;10383;11331
A0A9R0D7T1;A0A2H1VZS1;A0A9R0EMF9;E7CIJ8;Q8ISR7;E7CIJ9	A0A9R0D7T1;A0A2H1VZS1;A0A9R0EMF9	15;15;14;2;1;1	12;12;11;2;1;1	12;12;11;2;1;1			tr|A0A9R0D7T1|A0A9R0D7T1_SPOFR 14-3-3 protein zeta isoform X1 OS=Spodoptera frugiperda OX=7108 GN=LOC118271767 PE=1 SV=1;tr|A0A2H1VZS1|A0A2H1VZS1_SPOFR SFRICE_004363 OS=Spodoptera frugiperda OX=7108 GN=SFRICE_004363 PE=3 SV=1;tr|A0A9R0EMF9|A0A9R0EMF9_SPOFR	6	15	12	12	15	12	12	60.7	54.7	54.7	28.073	247	247;305;247;65;36;65	0	264.63	60.7	5422400000	5422400000	361490000	361490000	28				233	614;880;926;1131;1392;2897;3798;3816;3979;4188;4189;4889;5484;5841;5914	True;True;False;True;True;False;True;True;False;True;True;True;True;True;True	622;890;937;938;1148;1413;2934;3853;3872;4038;4256;4257;4258;4969;5571;5932;5933;6008	771;1094;1150;1151;1432;1803;1804;3672;4897;4917;5110;5375;5376;5377;5378;5379;6323;7063;7494;7495;7587	1148;1635;1636;1713;1714;1715;1716;2178;2179;2180;2768;2769;2770;2771;5626;5627;5628;5629;5630;5631;7477;7503;7769;8141;8142;8143;8144;8145;8146;9653;9654;9655;10795;11415;11416;11559;11560;11561;11562	1148;1635;1716;2178;2768;5628;7477;7503;7769;8141;8146;9655;10795;11416;11561	16;17	28;220
A0A9R0E9Q0;A0A9R0EAE3;A0A2H1VZS8;A0A9R0F5H9	A0A9R0E9Q0;A0A9R0EAE3;A0A2H1VZS8;A0A9R0F5H9	2;2;2;1	1;1;1;1	1;1;1;1			tr|A0A9R0E9Q0|A0A9R0E9Q0_SPOFR histidine--tRNA ligase OS=Spodoptera frugiperda OX=7108 GN=LOC118263401 PE=3 SV=1;tr|A0A9R0EAE3|A0A9R0EAE3_SPOFR histidine--tRNA ligase OS=Spodoptera frugiperda OX=7108 GN=LOC118263401 PE=3 SV=1;tr|A0A2H1VZS8|A0A2H1VZS8_SPOFR	4	2	1	1	2	1	1	4.5	3.1	3.1	57.679	516	516;606;606;523	0.0015129	1.8572	4.5	0	0	0	0	1				234	1284;2348	False;True	1305;2379	1669;2975	2559;4574	2559;4574
A0A2H1VZU6;A0A9R0EYU4	A0A2H1VZU6;A0A9R0EYU4	1;1	1;1	1;1			tr|A0A2H1VZU6|A0A2H1VZU6_SPOFR Histone acetyltransferase type B catalytic subunit (Fragment) OS=Spodoptera frugiperda OX=7108 GN=SFRICE_000608 PE=3 SV=1;tr|A0A9R0EYU4|A0A9R0EYU4_SPOFR Histone acetyltransferase type B catalytic subunit OS=Spodoptera frugipe	2	1	1	1	1	1	1	4.9	4.9	4.9	38.111	329	329;406	0	4.0142	4.9	1427900	1427900	89243	89243	2				235	5450	TRUE	5537	7022	10719;10720	10720
A0A9R0CVW6;A0A2H1VZU7	A0A9R0CVW6;A0A2H1VZU7	1;1	1;1	1;1			tr|A0A9R0CVW6|A0A9R0CVW6_SPOFR Vacuolar protein-sorting-associated protein 36 OS=Spodoptera frugiperda OX=7108 GN=LOC118263293 PE=3 SV=1;tr|A0A2H1VZU7|A0A2H1VZU7_SPOFR Vacuolar protein-sorting-associated protein 36 OS=Spodoptera frugiperda OX=7108 GN=SFRIC	2	1	1	1	1	1	1	4	4	4	44.648	402	402;402	0	3.7345	4	605210	605210	26314	26314	1				236	753	TRUE	762	943	1415	1415
A0A2H1VZW8;A0A9R0DA81	A0A2H1VZW8;A0A9R0DA81	2;2	2;2	2;2			tr|A0A2H1VZW8|A0A2H1VZW8_SPOFR SFRICE_009962 OS=Spodoptera frugiperda OX=7108 GN=SFRICE_009962 PE=3 SV=1;tr|A0A9R0DA81|A0A9R0DA81_SPOFR Lysosome-associated membrane glycoprotein 2 OS=Spodoptera frugiperda OX=7108 GN=LOC118273223 PE=3 SV=1	2	2	2	2	2	2	2	9.5	9.5	9.5	20.395	190	190;337	0	2.5804	9.5	15168000	15168000	1896000	1896000	2				237	3430;5192	True;True	3475;5275	4359;6697	6657;10222	6657;10222
A0A2H1W011;A0A9R0EZU2;A0A9R0DXC5;A0A9R0DXD2;A0A9R0DY39;A0A9R0DXP0	A0A2H1W011;A0A9R0EZU2;A0A9R0DXC5;A0A9R0DXD2;A0A9R0DY39;A0A9R0DXP0	1;1;1;1;1;1	1;1;1;1;1;1	1;1;1;1;1;1			tr|A0A2H1W011|A0A2H1W011_SPOFR SFRICE_029395 OS=Spodoptera frugiperda OX=7108 GN=SFRICE_029395 PE=3 SV=1;tr|A0A9R0EZU2|A0A9R0EZU2_SPOFR Transcriptional activator protein Pur-alpha isoform X5 OS=Spodoptera frugiperda OX=7108 GN=LOC126911564 PE=3 SV=1;tr|A0A	6	1	1	1	1	1	1	9.8	9.8	9.8	29.213	256	256;270;288;296;306;308	0	13.821	9.8	0	0	0	0	1				238	713	TRUE	722	895	1324	1324
A0A9R0DK83;A0A2H1W087	A0A9R0DK83;A0A2H1W087	1;1	1;1	1;1			tr|A0A9R0DK83|A0A9R0DK83_SPOFR U6 snRNA-associated Sm-like protein LSm8 OS=Spodoptera frugiperda OX=7108 GN=LOC118281608 PE=3 SV=1;tr|A0A2H1W087|A0A2H1W087_SPOFR U6 snRNA-associated Sm-like protein LSm8 OS=Spodoptera frugiperda OX=7108 GN=LSM8 PE=3 SV=1	2	1	1	1	1	1	1	20.8	20.8	20.8	10.263	96	96;155	0	8.2905	20.8	805070	805070	115010	115010	2				239	484	TRUE	491	613	896;897	896
A0A2H1W0E4;V5ND41	A0A2H1W0E4;V5ND41	17;16	17;16	17;16			tr|A0A2H1W0E4|A0A2H1W0E4_SPOFR DnaJ homolog subfamily A member 1 OS=Spodoptera frugiperda OX=7108 GN=SFRICE014504.2 PE=3 SV=1;tr|V5ND41|V5ND41_SPOFR DnaJ OS=Spodoptera frugiperda OX=7108 PE=2 SV=1	2	17	17	17	17	17	17	62.3	62.3	62.3	45.433	403	403;403	0	117.1	62.3	527280000	527280000	26364000	26364000	28				240	205;687;960;1095;1699;1974;2306;2438;2521;2641;2677;2738;3351;4278;4408;4617;5083	True;True;True;True;True;True;True;True;True;True;True;True;True;True;True;True;True	209;696;973;1112;1723;2000;2336;2471;2555;2677;2713;2775;3394;4347;4479;4692;5165	271;272;862;1189;1387;2168;2494;2921;3080;3182;3340;3341;3381;3454;4275;5486;5690;5980;6565	406;407;1284;1770;1771;2097;2098;3291;3292;3785;3786;4497;4729;4881;5110;5111;5112;5170;5171;5281;5282;5283;6545;8290;8602;9121;9122;10019	407;1284;1770;2098;3291;3786;4497;4729;4881;5112;5171;5283;6545;8290;8602;9121;10019
A0A2H1W0E5	A0A2H1W0E5	1	1	1			tr|A0A2H1W0E5|A0A2H1W0E5_SPOFR SFRICE_016826 (Fragment) OS=Spodoptera frugiperda OX=7108 GN=SFRICE_016826 PE=4 SV=1	1	1	1	1	1	1	1	1.4	1.4	1.4	90.11	806	806	0.0097087	1.2633	1.4	4689300	4689300	109050	109050	1				241	2403	TRUE	2434	3040	4680	4680
A0A2H1W0H4	A0A2H1W0H4	11	11	11			tr|A0A2H1W0H4|A0A2H1W0H4_SPOFR Large ribosomal subunit protein uL18 OS=Spodoptera frugiperda OX=7108 GN=LOC118262797 PE=3 SV=1	1	11	11	11	11	11	11	45.5	45.5	45.5	34.212	299	299	0	86.161	45.5	526590000	526590000	47871000	47871000	18				242	200;1583;1697;2301;2795;3101;3125;3126;4421;4692;5421	True;True;True;True;True;True;True;True;True;True;True	204;1604;1721;2331;2832;3140;3165;3166;4492;4767;5507	266;2031;2164;2165;2915;2916;3526;3914;3915;3946;3947;5705;6070;6071;6986	400;3098;3287;3288;4485;4486;4487;5407;5408;5409;5983;5984;6026;6027;8628;9255;9256;10674	400;3098;3288;4487;5408;5984;6026;6027;8628;9256;10674
A0A2H1W0M1;A0A9R0ERE1;A0A9R0DHE1;A0A9R0ER86;A0A9R0DGU5;A0A9R0E0R2;A0A9R0ERJ4;A0A9R0DGW4;A0A9R0DGT9;A0A9R0DGY5;A0A9R0DGX0	A0A2H1W0M1;A0A9R0ERE1;A0A9R0DHE1;A0A9R0ER86;A0A9R0DGU5;A0A9R0E0R2;A0A9R0ERJ4;A0A9R0DGW4;A0A9R0DGT9;A0A9R0DGY5;A0A9R0DGX0	1;1;1;1;1;1;1;1;1;1;1	1;1;1;1;1;1;1;1;1;1;1	1;1;1;1;1;1;1;1;1;1;1			tr|A0A2H1W0M1|A0A2H1W0M1_SPOFR SFRICE_000752 OS=Spodoptera frugiperda OX=7108 GN=SFRICE_000752 PE=4 SV=1;tr|A0A9R0ERE1|A0A9R0ERE1_SPOFR Trithorax group protein osa isoform X10 OS=Spodoptera frugiperda OX=7108 GN=LOC118277936 PE=4 SV=1;tr|A0A9R0DHE1|A0A9R0D	11	1	1	1	1	1	1	0.7	0.7	0.7	157.29	1491	1491;1674;1683;1684;1685;1688;1689;1698;1699;1713;1714	0.0014993	1.8058	0.7	0	0	0	0	1				243	2884	TRUE	2921	3658	5606	5606
A0A9R0E0B0;A0A2H1W0N3;A0A9R0F0E5;A0A9R0EZH6	A0A9R0E0B0;A0A2H1W0N3;A0A9R0F0E5;A0A9R0EZH6	25;25;24;24	25;25;24;24	25;25;24;24			tr|A0A9R0E0B0|A0A9R0E0B0_SPOFR Mothers against decapentaplegic homolog OS=Spodoptera frugiperda OX=7108 GN=LOC118278179 PE=3 SV=1;tr|A0A2H1W0N3|A0A2H1W0N3_SPOFR Mothers against decapentaplegic homolog OS=Spodoptera frugiperda OX=7108 GN=LOC118278179 PE=3 S	4	25	25	25	25	25	25	46.7	46.7	46.7	72.397	668	668;702;569;698	0	323.31	46.7	9177100000	9177100000	399010000	399010000	68				244	340;627;664;665;748;754;1347;1432;1433;1739;1763;2011;2029;2683;2742;3024;3582;3778;4162;4244;4330;4414;5645;5766;5815	True;True;True;True;True;True;True;True;True;True;True;True;True;True;True;True;True;True;True;True;True;True;True;True;True	344;345;635;672;673;757;763;1368;1453;1454;1763;1787;2037;2055;2719;2779;3062;3063;3631;3832;4230;4313;4399;4400;4485;5733;5856;5905	430;431;432;433;788;789;832;833;834;835;836;837;935;936;944;945;1742;1743;1851;1852;2215;2246;2534;2557;3387;3459;3821;3822;4591;4872;5342;5447;5594;5595;5596;5697;7250;7251;7252;7403;7404;7461	624;625;626;627;628;629;630;631;632;633;1179;1180;1237;1238;1239;1240;1241;1242;1243;1244;1399;1400;1416;1417;1418;2677;2678;2679;2680;2681;2682;2836;2837;2838;3356;3411;3839;3840;3841;3872;5179;5291;5832;5833;5834;5835;7031;7443;7444;8090;8237;8238;8239;8478;8479;8480;8481;8618;8619;11047;11048;11049;11050;11051;11052;11053;11279;11280;11281;11372	629;1180;1237;1241;1400;1416;2681;2836;2838;3356;3411;3839;3872;5179;5291;5834;7031;7444;8090;8238;8479;8618;11052;11279;11372	18;19;20	326;566;658
A0A2H1W0W3;A0A9R0D959	A0A2H1W0W3	9;4	9;4	9;4			tr|A0A2H1W0W3|A0A2H1W0W3_SPOFR Splicing factor 3B subunit 3 OS=Spodoptera frugiperda OX=7108 GN=LOC118272436 PE=3 SV=1	2	9	9	9	9	9	9	11.5	11.5	11.5	134.88	1218	1218;473	0	56.031	11.5	43594000	43594000	764810	764810	11				245	2111;2408;2646;3077;3405;3996;4085;5439;5730	True;True;True;True;True;True;True;True;True	2138;2439;2682;3116;3450;4055;4149;5526;5820	2664;3046;3347;3884;4334;5131;5235;7008;7359	4036;4688;5119;5925;5926;6626;7797;7947;10700;11223;11224	4036;4688;5119;5926;6626;7797;7947;10700;11224
A0A2H1W0Y8;A0A9R0ENF0	A0A2H1W0Y8;A0A9R0ENF0	9;8	9;8	9;8			tr|A0A2H1W0Y8|A0A2H1W0Y8_SPOFR SFRICE_021841 (Fragment) OS=Spodoptera frugiperda OX=7108 GN=SFRICE_021841 PE=3 SV=1;tr|A0A9R0ENF0|A0A9R0ENF0_SPOFR LOW QUALITY PROTEIN: fibronectin type-III domain-containing protein 3a OS=Spodoptera frugiperda OX=7108 GN=LO	2	9	9	9	9	9	9	8.5	8.5	8.5	129.11	1194	1194;1173	0	9.6631	8.5	186540000	186540000	4239400	4239400	10				246	437;1798;2080;2244;2947;3281;3600;5104;5272	True;True;True;True;True;True;True;True;True	444;1822;2107;2273;2984;3323;3649;5186;5355	555;2283;2619;2847;3729;4149;4610;6587;6588;6800	813;3471;3973;4396;4397;5699;6320;7051;10049;10050;10051;10394	813;3471;3973;4396;5699;6320;7051;10050;10394
A0A9R0DS19;A0A2H1W0Z1;A0A9R0EMZ1;A0A9R0DRR1	A0A9R0DS19;A0A2H1W0Z1;A0A9R0EMZ1;A0A9R0DRR1	6;6;6;6	6;6;6;6	6;6;6;6			tr|A0A9R0DS19|A0A9R0DS19_SPOFR Lysine--tRNA ligase OS=Spodoptera frugiperda OX=7108 GN=LOC118273186 PE=3 SV=1;tr|A0A2H1W0Z1|A0A2H1W0Z1_SPOFR Lysine--tRNA ligase OS=Spodoptera frugiperda OX=7108 GN=LOC118273186 PE=3 SV=1;tr|A0A9R0EMZ1|A0A9R0EMZ1_SPOFR Lysin	4	6	6	6	6	6	6	11.4	11.4	11.4	65.712	581	581;581;600;600	0	14.115	11.4	55290000	55290000	1727800	1727800	5				247	118;650;1460;3168;3545;3767	True;True;True;True;True;True	121;658;1481;3209;3593;3819	153;814;1887;3998;4496;4811	217;1213;2908;6097;6853;7323	217;1213;2908;6097;6853;7323
A0A9R0CWW8;A0A2H1W166	A0A9R0CWW8;A0A2H1W166	4;4	4;4	4;4			tr|A0A9R0CWW8|A0A9R0CWW8_SPOFR leucine--tRNA ligase OS=Spodoptera frugiperda OX=7108 GN=LOC118263830 PE=3 SV=1;tr|A0A2H1W166|A0A2H1W166_SPOFR leucine--tRNA ligase OS=Spodoptera frugiperda OX=7108 GN=SFRICE_013336 PE=3 SV=1	2	4	4	4	4	4	4	4.3	4.3	4.3	134.13	1176	1176;1183	0	8.3064	4.3	10691000	10691000	161980	161980	4				248	1516;2676;5015;5545	True;True;True;True	1537;2712;5097;5632	1950;3380;6487;7137	2998;5169;9907;10900;10901	2998;5169;9907;10901
A0A9R0EU70;A0A2H1W1S3	A0A9R0EU70;A0A2H1W1S3	1;1	1;1	1;1			tr|A0A9R0EU70|A0A9R0EU70_SPOFR General transcription factor IIE subunit 1 OS=Spodoptera frugiperda OX=7108 GN=LOC118281635 PE=3 SV=1;tr|A0A2H1W1S3|A0A2H1W1S3_SPOFR SFRICE_003776 (Fragment) OS=Spodoptera frugiperda OX=7108 GN=SFRICE_003776 PE=3 SV=1	2	1	1	1	1	1	1	2.4	2.4	2.4	47.596	421	421;783	0.0084034	1.3011	2.4	8876600	8876600	422690	422690	1				249	3609	TRUE	3658	4619	7064	7064
A0A9R0DST3;A0A2H1W1Y1	A0A9R0DST3;A0A2H1W1Y1	2;2	2;2	2;2			tr|A0A9R0DST3|A0A9R0DST3_SPOFR ATP-dependent RNA helicase DDX1 OS=Spodoptera frugiperda OX=7108 GN=LOC118275218 PE=3 SV=1;tr|A0A2H1W1Y1|A0A2H1W1Y1_SPOFR ATP-dependent RNA helicase DDX1 OS=Spodoptera frugiperda OX=7108 GN=SFRICE_006635 PE=3 SV=1	2	2	2	2	2	2	2	2.7	2.7	2.7	81.048	728	728;728	0	2.3167	2.7	4412200	4412200	116110	116110	2				250	1470;3719	True;True	1491;3769	1899;4749	2934;7241	2934;7241
A0A2H1W267	A0A2H1W267	2	2	2			tr|A0A2H1W267|A0A2H1W267_SPOFR ATP-dependent helicase brm OS=Spodoptera frugiperda OX=7108 GN=LOC118262304 PE=4 SV=1	1	2	2	2	2	2	2	1.1	1.1	1.1	188.67	1691	1691	0.0095368	1.1608	1.1	3291200	3291200	52241	52241	2				251	5049;5478	True;True	5131;5565	6525;7056	9960;10783	9960;10783
A0A2H1W273;A0A9R0D328;A0A2H1WY69	A0A2H1W273;A0A9R0D328	17;17;6	17;17;6	17;17;6			tr|A0A2H1W273|A0A2H1W273_SPOFR Bifunctional purine biosynthesis protein ATIC OS=Spodoptera frugiperda OX=7108 GN=SFRICE_001796 PE=3 SV=1;tr|A0A9R0D328|A0A9R0D328_SPOFR Bifunctional purine biosynthesis protein ATIC OS=Spodoptera frugiperda OX=7108 GN=LOC118	3	17	17	17	17	17	17	36	36	36	64.619	594	594;594;310	0	61.654	36	602900000	602900000	20097000	20097000	27				252	41;160;236;774;814;1014;2914;3853;4022;4134;4398;5018;5054;5094;5295;5702;6003	True;True;True;True;True;True;True;True;True;True;True;True;True;True;True;True;True	41;163;240;783;824;1031;2951;3912;4084;4201;4469;5100;5136;5176;5378;5791;6099	49;202;311;312;966;1011;1289;3690;4962;5165;5300;5680;6490;6531;6576;6826;7329;7720	62;63;64;274;459;460;1452;1516;1517;1947;5653;7576;7844;7845;8036;8589;8590;9910;9911;9969;10034;10428;10429;10430;10431;11182;11768	62;274;459;1452;1517;1947;5653;7576;7844;8036;8589;9911;9969;10034;10431;11182;11768
A0A9R0DGC4;A0A2H1W2F8	A0A9R0DGC4;A0A2H1W2F8	2;2	2;2	2;2			tr|A0A9R0DGC4|A0A9R0DGC4_SPOFR non-specific serine/threonine protein kinase OS=Spodoptera frugiperda OX=7108 GN=LOC118277567 PE=3 SV=1;tr|A0A2H1W2F8|A0A2H1W2F8_SPOFR non-specific serine/threonine protein kinase OS=Spodoptera frugiperda OX=7108 GN=SFRICE_00	2	2	2	2	2	2	2	9.4	9.4	9.4	27.055	234	234;531	0.0014793	1.6757	9.4	16568000	16568000	1506200	1506200	1				253	1989;3342	True;True	2015;3384	2512;4223	3809;6423	3809;6423
A0A9R0ECX5;A0A9R0EC30;A0A3G5BLU4;A0A2H1W2J1	A0A9R0ECX5;A0A9R0EC30;A0A3G5BLU4;A0A2H1W2J1	1;1;1;1	1;1;1;1	1;1;1;1			tr|A0A9R0ECX5|A0A9R0ECX5_SPOFR Arylsulfatase B isoform X2 OS=Spodoptera frugiperda OX=7108 GN=LOC118268646 PE=3 SV=1;tr|A0A9R0EC30|A0A9R0EC30_SPOFR Arylsulfatase B isoform X1 OS=Spodoptera frugiperda OX=7108 GN=LOC118268646 PE=3 SV=1;tr|A0A3G5BLU4|A0A3G5BL	4	1	1	1	1	1	1	1.4	1.4	1.4	66.456	589	589;607;607;1565	0.0084388	1.3187	1.4	177850000	177850000	4806700	4806700	2				254	2632	TRUE	2667	3325	5085;5086	5086
A0A9R0DFH2;A0A2H1W2K7	A0A9R0DFH2;A0A2H1W2K7	4;4	4;4	4;4			tr|A0A9R0DFH2|A0A9R0DFH2_SPOFR Probable deoxyhypusine synthase OS=Spodoptera frugiperda OX=7108 GN=LOC118276892 PE=3 SV=1;tr|A0A2H1W2K7|A0A2H1W2K7_SPOFR SFRICE_014524 OS=Spodoptera frugiperda OX=7108 GN=SFRICE_014524 PE=3 SV=1	2	4	4	4	4	4	4	19.1	19.1	19.1	41.102	371	371;371	0	8.3043	19.1	7813400	7813400	411230	411230	4				255	1457;2561;3563;4609	True;True;True;True	1478;2596;3611;4684	1883;3231;3232;4516;5972	2898;4948;4949;6879;9112	2898;4949;6879;9112
A0A9R0DAY0;A0A9R0EP66;A0A2H1W2T3	A0A9R0DAY0;A0A9R0EP66;A0A2H1W2T3	8;8;8	8;8;8	2;2;2			tr|A0A9R0DAY0|A0A9R0DAY0_SPOFR Isocitrate dehydrogenase [NAD] subunit, mitochondrial OS=Spodoptera frugiperda OX=7108 GN=LOC118273801 PE=3 SV=1;tr|A0A9R0EP66|A0A9R0EP66_SPOFR Isocitrate dehydrogenase [NAD] subunit, mitochondrial OS=Spodoptera frugiperda OX	3	8	8	2	8	8	2	31.5	31.5	7.5	39.149	359	359;393;399	0	16.293	31.5	71436000	71436000	3968700	3968700	10				256	221;819;1263;2154;3198;5121;5640;5706	True;True;True;True;True;True;True;True	225;829;1284;2181;3240;5204;5728;5795	293;1016;1641;2722;4037;6606;7245;7333	439;1524;1525;2505;4162;4163;6146;10079;11040;11188	439;1524;2505;4162;6146;10079;11040;11188
A0A2H1W2W7;A0A7G9U6H9;A0A5Q0TYX8;A0A9R0DJF4;A0A2H1W1Y8;A0A9R0DJI7	A0A2H1W2W7;A0A7G9U6H9	9;8;4;2;2;1	8;7;4;2;2;1	8;7;4;2;2;1			tr|A0A2H1W2W7|A0A2H1W2W7_SPOFR SFRICE013253.2 OS=Spodoptera frugiperda OX=7108 GN=SFRICE013253.2 PE=3 SV=1;tr|A0A7G9U6H9|A0A7G9U6H9_SPOFR Heat shock protein OS=Spodoptera frugiperda OX=7108 GN=Hsp21.37 PE=2 SV=1	6	9	8	8	9	8	8	30.6	26	26	44.167	392	392;189;183;183;183;212	0	20.842	30.6	135360000	135360000	5640100	5640100	14				257	1594;2165;2698;2859;2860;3229;3511;4713;5760	False;True;True;True;True;True;True;True;True	1615;2192;2734;2896;2897;3271;3559;4788;5850	2043;2734;3405;3624;3625;4075;4458;6097;7397	3111;4183;5207;5555;5556;5557;5558;5559;5560;5561;5562;6206;6207;6801;9288;11271	3111;4183;5207;5555;5561;6207;6801;9288;11271
A0A9R0D084;A0A2H1W2Z2	A0A9R0D084;A0A2H1W2Z2	7;7	7;7	7;7			tr|A0A9R0D084|A0A9R0D084_SPOFR Hemocyte protein-glutamine gamma-glutamyltransferase-like OS=Spodoptera frugiperda OX=7108 GN=LOC118266292 PE=3 SV=1;tr|A0A2H1W2Z2|A0A2H1W2Z2_SPOFR SFRICE_002791 OS=Spodoptera frugiperda OX=7108 GN=SFRICE_002791 PE=3 SV=1	2	7	7	7	7	7	7	11.7	11.7	11.7	79.288	708	708;725	0	21.27	11.7	99144000	99144000	2609100	2609100	10				258	2563;2915;3423;3517;3688;5489;5765	True;True;True;True;True;True;True	2598;2952;3468;3565;3738;5576;5855	3235;3691;4352;4466;4713;7069;7402	4952;5654;5655;6649;6811;6812;7193;10801;10802;11278	4952;5655;6649;6812;7193;10802;11278
A0A2H1W368	A0A2H1W368	13	13	13			tr|A0A2H1W368|A0A2H1W368_SPOFR Transcription factor BTF3 OS=Spodoptera frugiperda OX=7108 GN=LOC118270365 PE=3 SV=1	1	13	13	13	13	13	13	68.7	68.7	68.7	19.592	179	179	0	135.35	68.7	685150000	685150000	85644000	85644000	37				259	443;738;1375;2864;2939;2940;2941;3527;3528;4261;4262;5745;5746	True;True;True;True;True;True;True;True;True;True;True;True;True	450;747;1396;2901;2976;2977;2978;3575;3576;4330;4331;5835;5836	561;562;925;1779;3631;3721;3722;3723;4476;4477;4478;5467;5468;7376;7377;7378;7379;7380	821;822;823;824;825;826;1384;2731;2732;2733;2734;2735;2736;5569;5689;5690;5691;5692;5693;6827;6828;6829;6830;6831;8265;8266;8267;8268;8269;11245;11246;11247;11248;11249;11250;11251;11252	826;1384;2732;5569;5689;5691;5693;6827;6829;8265;8268;11248;11252
A0A9R0DED0;A0A2H1W380	A0A9R0DED0;A0A2H1W380	9;9	9;9	9;9			tr|A0A9R0DED0|A0A9R0DED0_SPOFR DNA replication licensing factor MCM5 OS=Spodoptera frugiperda OX=7108 GN=LOC118275939 PE=3 SV=1;tr|A0A2H1W380|A0A2H1W380_SPOFR DNA replication licensing factor MCM5 OS=Spodoptera frugiperda OX=7108 GN=SFRICE_003253 PE=3 SV=1	2	9	9	9	9	9	9	15.4	15.4	15.4	81.297	729	729;729	0	14.816	15.4	83320000	83320000	2083000	2083000	10				260	676;1335;1426;1958;2161;2255;2513;2885;5719	True;True;True;True;True;True;True;True;True	685;1356;1447;1984;2188;2284;2547;2922;5808	850;1729;1845;2475;2729;2860;3171;3659;7346	1267;2653;2654;2830;3758;4178;4415;4416;4862;5607;11208	1267;2654;2830;3758;4178;4416;4862;5607;11208
A0A9R0EKS5;A0A2H1W3B0	A0A9R0EKS5;A0A2H1W3B0	3;3	3;3	3;3			tr|A0A9R0EKS5|A0A9R0EKS5_SPOFR peptidylprolyl isomerase OS=Spodoptera frugiperda OX=7108 GN=LOC118269798 PE=4 SV=1;tr|A0A2H1W3B0|A0A2H1W3B0_SPOFR peptidylprolyl isomerase OS=Spodoptera frugiperda OX=7108 GN=LOC118269798 PE=4 SV=1	2	3	3	3	3	3	3	8.3	8.3	8.3	46.719	423	423;473	0	12.357	8.3	6137700	6137700	292270	292270	3				261	2972;5762;5771	True;True;True	3010;5852;5861	3759;7399;7410	5744;11275;11287	5744;11275;11287
A0A2H1W3F3	A0A2H1W3F3	6	6	6			tr|A0A2H1W3F3|A0A2H1W3F3_SPOFR Nascent polypeptide-associated complex subunit alpha OS=Spodoptera frugiperda OX=7108 GN=LOC118280025 PE=3 SV=1	1	6	6	6	6	6	6	36	36	36	22.506	211	211	0	33.064	36	865840000	865840000	108230000	108230000	10				262	2293;3103;3944;4018;4027;4141	True;True;True;True;True;True	2322;2323;3142;4003;4080;4089;4208	2902;2903;2904;3917;5067;5161;5170;5310	4464;4465;4466;5986;5987;7709;7839;7851;7852;8052	4465;5986;7709;7839;7852;8052	21;22	130;211
A0A2H1W3L5	A0A2H1W3L5	2	2	2			tr|A0A2H1W3L5|A0A2H1W3L5_SPOFR Proteasome subunit beta type-1 OS=Spodoptera frugiperda OX=7108 GN=LOC118265820 PE=4 SV=1	1	2	2	2	2	2	2	10.3	10.3	10.3	25.67	232	232	0.0015244	1.8854	10.3	25382000	25382000	2115200	2115200	2				263	1712;3796	True;True	1736;3851	2182;4895	3314;7475	3314;7475
A0A2H1W407;A0A9R0D2B0	A0A2H1W407;A0A9R0D2B0	1;1	1;1	1;1			tr|A0A2H1W407|A0A2H1W407_SPOFR IkappaB kinase OS=Spodoptera frugiperda OX=7108 GN=SFRICE_017710 PE=4 SV=1;tr|A0A9R0D2B0|A0A9R0D2B0_SPOFR IkappaB kinase OS=Spodoptera frugiperda OX=7108 GN=LOC118267623 PE=4 SV=1	2	1	1	1	1	1	1	1	1	1	88.016	766	766;767	0.0015337	1.9589	1	18592000000	18592000000	404180000	404180000	5				264	3160	TRUE	3201	3987	6081;6082;6083;6084;6085	6085
A0A2H1W479;A0A9R0EVI5	A0A2H1W479;A0A9R0EVI5	2;2	2;2	2;2			tr|A0A2H1W479|A0A2H1W479_SPOFR Oxysterol-binding protein (Fragment) OS=Spodoptera frugiperda OX=7108 GN=SFRICE_033917 PE=3 SV=1;tr|A0A9R0EVI5|A0A9R0EVI5_SPOFR Oxysterol-binding protein OS=Spodoptera frugiperda OX=7108 GN=LOC118265836 PE=3 SV=1	2	2	2	2	2	2	2	7	7	7	41.775	370	370;707	0	2.3213	7	1265000	1265000	66577	66577	2				265	2628;4707	True;True	2663;4782	3321;6090	5081;9280	5081;9280
A0A2H1W4I7	A0A2H1W4I7	4	4	4			tr|A0A2H1W4I7|A0A2H1W4I7_SPOFR Geminin OS=Spodoptera frugiperda OX=7108 GN=LOC118269270 PE=3 SV=1	1	4	4	4	4	4	4	28.1	28.1	28.1	19.386	171	171	0	25.8	28.1	188460000	188460000	23557000	23557000	5				266	2191;2379;4375;6026	True;True;True;True	2219;2410;4446;6122	2769;2770;3011;3012;5650;7749	4240;4241;4640;4641;8550;11813	4241;4640;8550;11813
A0A9R0EXP1;A0A9R0DV06;A0A2H1W4K0	A0A9R0EXP1;A0A9R0DV06;A0A2H1W4K0	4;4;4	4;4;4	4;4;4			tr|A0A9R0EXP1|A0A9R0EXP1_SPOFR Protein PRRC2C-like isoform X2 OS=Spodoptera frugiperda OX=7108 GN=LOC118263170 PE=4 SV=1;tr|A0A9R0DV06|A0A9R0DV06_SPOFR Protein PRRC2C-like isoform X1 OS=Spodoptera frugiperda OX=7108 GN=LOC118263170 PE=4 SV=1;tr|A0A2H1W4K0|	3	4	4	4	4	4	4	3.9	3.9	3.9	228.42	2084	2084;2085;2085	0	8.4057	3.9	32316000	32316000	343790	343790	4				267	1997;2974;4631;4869	True;True;True;True	2023;3012;4706;4948	2520;3762;5996;6296	3820;5747;9143;9595	3820;5747;9143;9595
A0A2H1W4V5	A0A2H1W4V5	3	3	1			tr|A0A2H1W4V5|A0A2H1W4V5_SPOFR SFRICE_006993 (Fragment) OS=Spodoptera frugiperda OX=7108 GN=SFRICE_006993 PE=3 SV=1	1	3	3	1	3	3	1	5.7	5.7	1.9	65.167	594	594	0	4.0469	5.7	72035000	72035000	2001000	2001000	2				268	1631;2016;3987	True;True;True	1652;2042;4046	2084;2539;5118	3173;3847;7781	3173;3847;7781
A0A2H1W5D9	A0A2H1W5D9	7	1	1			tr|A0A2H1W5D9|A0A2H1W5D9_SPOFR SFRICE_001068 OS=Spodoptera frugiperda OX=7108 GN=SFRICE_001068 PE=4 SV=1	1	7	1	1	7	1	1	29.4	6.1	6.1	33.733	309	309	0	3.5472	29.4	17248000	17248000	1014600	1014600	0				269	300;487;3172;3813;3917;4257;4500	False;True;False;False;False;False;False	304;494;3213;3869;3976;4326;4572;4573	383;616;4002;4003;4913;5036;5462;5810;5811;5812;5813;5814	553;900;6102;6103;6104;6105;6106;7497;7498;7662;7663;7664;7665;8260;8792;8793;8794;8795;8796;8797;8798	553;900;6104;7498;7665;8260;8798	23	242
A0A9R0D8H1;A0A2H1W5F3	A0A9R0D8H1;A0A2H1W5F3	1;1	1;1	1;1			tr|A0A9R0D8H1|A0A9R0D8H1_SPOFR U6 snRNA-associated Sm-like protein LSm7 isoform X2 OS=Spodoptera frugiperda OX=7108 GN=LOC118272094 PE=3 SV=1;tr|A0A2H1W5F3|A0A2H1W5F3_SPOFR SFRICE_006549 OS=Spodoptera frugiperda OX=7108 GN=LOC118272094 PE=3 SV=1	2	1	1	1	1	1	1	21.7	21.7	21.7	12.556	115	115;118	0	5.2409	21.7	1997700	1997700	332960	332960	2				270	2034	TRUE	2060	2562	3877;3878	3878
A0A2H1W5V1	A0A2H1W5V1	2	2	2			tr|A0A2H1W5V1|A0A2H1W5V1_SPOFR Vacuolar protein sorting-associated protein 29 OS=Spodoptera frugiperda OX=7108 GN=LOC118275161 PE=3 SV=1	1	2	2	2	2	2	2	17	17	17	20.698	182	182	0	2.9412	17	3939300	3939300	358120	358120	2				271	2344;5487	True;True	2375;5574	2971;7067	4569;10799	4569;10799
Q95V34;A0A9R0DK16;A0A2H1W659	Q95V34;A0A9R0DK16;A0A2H1W659	1;1;1	1;1;1	1;1;1			sp|Q95V34|RS4_SPOFR Small ribosomal subunit protein eS4 OS=Spodoptera frugiperda OX=7108 GN=RpS4 PE=2 SV=1;tr|A0A9R0DK16|A0A9R0DK16_SPOFR 40S ribosomal protein S4 OS=Spodoptera frugiperda OX=7108 GN=LOC118281555 PE=3 SV=1;tr|A0A2H1W659|A0A2H1W659_SPOFR 40S	3	1	1	1	1	1	1	3.8	3.8	3.8	29.553	263	263;263;281	0.0097902	1.2923	3.8	0	0	0	0	1				272	925	TRUE	936	1149	1712	1712
A0A2H1W6G3;A0A9R0D8L7;A0A9R0EM61	A0A2H1W6G3;A0A9R0D8L7;A0A9R0EM61	1;1;1	1;1;1	1;1;1			tr|A0A2H1W6G3|A0A2H1W6G3_SPOFR Protein phosphatase 1 regulatory subunit 7 isoform X3 OS=Spodoptera frugiperda OX=7108 GN=LOC118272041 PE=4 SV=1;tr|A0A9R0D8L7|A0A9R0D8L7_SPOFR Dynein axonemal assembly factor 1 homolog OS=Spodoptera frugiperda OX=7108 GN=LOC	3	1	1	1	1	1	1	2.9	2.9	2.9	38.98	341	341;360;370	0.0014903	1.7331	2.9	0	0	0	0	1				273	4028	TRUE	4090	5171	7853	7853
A0A9R0EN75;A0A2H1W6H0	A0A9R0EN75;A0A2H1W6H0	3;3	3;3	3;3			tr|A0A9R0EN75|A0A9R0EN75_SPOFR 26S proteasome non-ATPase regulatory subunit 7 OS=Spodoptera frugiperda OX=7108 GN=LOC118273461 PE=3 SV=1;tr|A0A2H1W6H0|A0A2H1W6H0_SPOFR SFRICE_018208 OS=Spodoptera frugiperda OX=7108 GN=SFRICE_018208 PE=3 SV=1	2	3	3	3	3	3	3	17.6	17.6	17.6	37.466	330	330;330	0	9.3099	17.6	14769000	14769000	984610	984610	4				274	829;4989;5742	True;True;True	839;5070;5832	1028;6451;7371;7372	1539;9848;11239;11240	1539;9848;11239
A0A2H1W6J7	A0A2H1W6J7	3	3	3			tr|A0A2H1W6J7|A0A2H1W6J7_SPOFR Proteasome subunit beta OS=Spodoptera frugiperda OX=7108 GN=LOC118279861 PE=3 SV=1	1	3	3	3	3	3	3	24.7	24.7	24.7	28.991	263	263	0	15.688	24.7	2419200	2419200	201600	201600	4				275	2376;3120;3673	True;True;True	2407;3160;3723	3008;3939;4694;4695	4636;6014;7172;7173	4636;6014;7172
A0A9R0DIP6;A0A2H1W6R8	A0A9R0DIP6;A0A2H1W6R8	3;3	3;3	3;3			tr|A0A9R0DIP6|A0A9R0DIP6_SPOFR Presequence protease, mitochondrial OS=Spodoptera frugiperda OX=7108 GN=LOC118279739 PE=4 SV=1;tr|A0A2H1W6R8|A0A2H1W6R8_SPOFR SFRICE_041661 OS=Spodoptera frugiperda OX=7108 GN=SFRICE_041661 PE=4 SV=1	2	3	3	3	3	3	3	4	4	4	116.55	1014	1014;1014	0	3.5798	4	29229000	29229000	541270	541270	3				276	744;3491;3908	True;True;True	753;3537;3967	931;4431;5027	1395;6764;7653	1395;6764;7653
A0A2H1W6T4;Q8ISR8	A0A2H1W6T4	20;2	20;2	20;2			tr|A0A2H1W6T4|A0A2H1W6T4_SPOFR Polyadenylate-binding protein OS=Spodoptera frugiperda OX=7108 GN=LOC118279494 PE=3 SV=1	2	20	20	20	20	20	20	39.6	39.6	39.6	68.246	611	611;86	0	66.896	39.6	411200000	411200000	12850000	12850000	36				277	83;258;276;380;1085;1226;1618;1753;1754;2642;2689;3060;3067;3907;3964;4030;4630;4702;5340;5589	True;True;True;True;True;True;True;True;True;True;True;True;True;True;True;True;True;True;True;True	85;262;280;387;1102;1245;1639;1777;1778;2678;2725;3099;3106;3966;4023;4092;4705;4777;5423;5676	101;337;358;482;1370;1371;1586;1587;2068;2235;2236;3342;3393;3394;3863;3873;5026;5092;5173;5995;6085;6874;7186	135;136;137;138;490;524;702;2059;2060;2406;2407;3153;3392;3393;3394;5113;5114;5185;5186;5187;5188;5189;5190;5191;5192;5895;5908;7651;7652;7742;7743;7855;9142;9275;10499;10965	137;490;524;702;2060;2407;3153;3392;3394;5114;5189;5895;5908;7651;7743;7855;9142;9275;10499;10965
A0A2H1W709	A0A2H1W709	1	1	1			tr|A0A2H1W709|A0A2H1W709_SPOFR COP9 signalosome complex subunit 1 OS=Spodoptera frugiperda OX=7108 GN=LOC118272839 PE=3 SV=1	1	1	1	1	1	1	1	3.1	3.1	3.1	54.465	483	483	0	3.3534	3.1	1180200	1180200	65567	65567	2				278	307	TRUE	311	390	564;565	565
A0A2H1W710	A0A2H1W710	9	9	9			tr|A0A2H1W710|A0A2H1W710_SPOFR Brain tumor protein OS=Spodoptera frugiperda OX=7108 GN=LOC118263815 PE=4 SV=1	1	9	9	9	9	9	9	15.2	15.2	15.2	93.03	862	862	0	17.617	15.2	261860000	261860000	7481700	7481700	12				279	71;528;1566;2015;2277;2512;2629;3336;3910	True;True;True;True;True;True;True;True;True	73;535;1587;2041;2306;2546;2664;3378;3969	87;665;2013;2538;2885;3170;3322;4216;5029	118;989;990;3076;3845;3846;4444;4860;4861;5082;6411;7655	118;990;3076;3845;4444;4860;5082;6411;7655
A0A2H1W737;A0A9R0DY62	A0A2H1W737;A0A9R0DY62	6;4	6;4	6;4			tr|A0A2H1W737|A0A2H1W737_SPOFR tRNA pseudouridine(55) synthase OS=Spodoptera frugiperda OX=7108 GN=SFRICE_015867 PE=3 SV=1;tr|A0A9R0DY62|A0A9R0DY62_SPOFR tRNA pseudouridine(55) synthase OS=Spodoptera frugiperda OX=7108 GN=LOC126911573 PE=3 SV=1	2	6	6	6	6	6	6	16.1	16.1	16.1	61.715	564	564;547	0	9.6627	16.1	62790000	62790000	1846800	1846800	6				280	33;266;332;570;5085;5175	True;True;True;True;True;True	33;270;336;578;5167;5258	40;345;422;714;6567;6668	51;503;612;1067;10021;10158	51;503;612;1067;10021;10158
A0A2H1W7E3;A0A9R0DDU7;A0A9R0EPH8;A0A9R0DQI1	A0A2H1W7E3;A0A9R0DDU7;A0A9R0EPH8;A0A9R0DQI1	3;3;3;3	3;3;3;3	3;3;3;3			tr|A0A2H1W7E3|A0A2H1W7E3_SPOFR Protein transport protein SEC23 OS=Spodoptera frugiperda OX=7108 GN=SFRICE_025945 PE=3 SV=1;tr|A0A9R0DDU7|A0A9R0DDU7_SPOFR Protein transport protein SEC23 OS=Spodoptera frugiperda OX=7108 GN=LOC118275263 PE=3 SV=1;tr|A0A9R0EP	4	3	3	3	3	3	3	7.2	7.2	7.2	57.306	515	515;765;772;786	0	4.2558	7.2	36296000	36296000	1396000	1396000	2				281	3615;3837;4275	True;True;True	3664;3896;4344	4626;4946;5482	7075;7547;8286	7075;7547;8286
A0A9R0ERQ9;A0A2H1W7G3	A0A9R0ERQ9;A0A2H1W7G3	3;3	3;3	3;3			tr|A0A9R0ERQ9|A0A9R0ERQ9_SPOFR Probable enoyl-CoA hydratase OS=Spodoptera frugiperda OX=7108 GN=LOC118277211 PE=3 SV=1;tr|A0A2H1W7G3|A0A2H1W7G3_SPOFR SFRICE_015857 OS=Spodoptera frugiperda OX=7108 GN=SFRICE_015857 PE=3 SV=1	2	3	3	3	3	3	3	12.8	12.8	12.8	37.585	343	343;343	0	7.944	12.8	48089000	48089000	2828800	2828800	4				282	3555;3558;5457	True;True;True	3603;3606;5544	4507;4511;7030	6869;6873;10730;10731	6869;6873;10731
A0A9R0D6P2;A0A2H1W7H4	A0A9R0D6P2;A0A2H1W7H4	9;9	9;9	9;9			tr|A0A9R0D6P2|A0A9R0D6P2_SPOFR C-terminal-binding protein isoform X2 OS=Spodoptera frugiperda OX=7108 GN=LOC118270708 PE=3 SV=1;tr|A0A2H1W7H4|A0A2H1W7H4_SPOFR C-terminal-binding protein isoform X1 OS=Spodoptera frugiperda OX=7108 GN=LOC118270708 PE=3 SV=1	2	9	9	9	9	9	9	23.2	23.2	23.2	49.572	462	462;466	0	15.625	23.2	127410000	127410000	7078500	7078500	11				283	5;153;732;1231;1910;2352;2736;4144;4159	True;True;True;True;True;True;True;True;True	5;156;741;1250;1935;2383;2773;4211;4227	6;195;917;1593;1594;2408;2979;3452;5314;5338	8;9;10;267;1372;2415;2416;3663;4581;5277;8056;8084	9;267;1372;2415;3663;4581;5277;8056;8084
A0A9R0DGY3;A0A9R0DGX3;A0A2H1W7T1;A0A9R0DH86	A0A9R0DGY3;A0A9R0DGX3;A0A2H1W7T1;A0A9R0DH86	12;12;12;12	12;12;12;12	12;12;12;12			tr|A0A9R0DGY3|A0A9R0DGY3_SPOFR UTP--glucose-1-phosphate uridylyltransferase OS=Spodoptera frugiperda OX=7108 GN=LOC118277941 PE=3 SV=1;tr|A0A9R0DGX3|A0A9R0DGX3_SPOFR UTP--glucose-1-phosphate uridylyltransferase OS=Spodoptera frugiperda OX=7108 GN=LOC118277	4	12	12	12	12	12	12	32.1	32.1	32.1	57.13	508	508;512;513;521	0	31.88	32.1	238260000	238260000	9927700	9927700	15				284	671;1323;1469;1527;2139;2276;3015;3034;3082;3240;3379;3878	True;True;True;True;True;True;True;True;True;True;True;True	679;1344;1490;1548;2166;2305;3053;3073;3121;3282;3422;3937	843;1716;1898;1964;2704;2884;3810;3832;3890;4087;4304;4989	1255;2631;2933;3015;4113;4443;5820;5851;5852;5937;5938;6228;6229;6583;6584;7611	1255;2631;2933;3015;4113;4443;5820;5852;5938;6229;6583;7611
A0A9R0EML5;A0A2H1W7W9	A0A9R0EML5;A0A2H1W7W9	6;6	6;6	6;6			tr|A0A9R0EML5|A0A9R0EML5_SPOFR Proteasome subunit alpha type OS=Spodoptera frugiperda OX=7108 GN=LOC118272692 PE=3 SV=1;tr|A0A2H1W7W9|A0A2H1W7W9_SPOFR Proteasome subunit alpha type OS=Spodoptera frugiperda OX=7108 GN=SFRICE_002208 PE=3 SV=1	2	6	6	6	6	6	6	28.5	28.5	28.5	27.194	246	246;246	0	9.0983	28.5	157380000	157380000	8743400	8743400	8				285	233;1968;2134;2159;3228;5888	True;True;True;True;True;True	237;1994;2161;2186;3270;5981	308;2487;2695;2727;4074;7551	456;3774;4078;4168;4169;4170;4171;6205;11501;11502	456;3774;4078;4169;6205;11502
A0A9R0D335;A0A9R0D332;A0A2H1W8B2	A0A9R0D335;A0A9R0D332;A0A2H1W8B2	4;4;4	4;4;4	4;4;4			tr|A0A9R0D335|A0A9R0D335_SPOFR Acidic leucine-rich nuclear phosphoprotein 32 family member A isoform X2 OS=Spodoptera frugiperda OX=7108 GN=LOC118268171 PE=3 SV=1;tr|A0A9R0D332|A0A9R0D332_SPOFR Acidic leucine-rich nuclear phosphoprotein 32 family member A	3	4	4	4	4	4	4	20.5	20.5	20.5	29.333	258	258;304;304	0	28.437	20.5	62587000	62587000	5215600	5215600	5				286	2415;2794;3968;5377	True;True;True;True	2447;2831;4027;5461	3055;3525;5099;6936	4702;5404;5405;5406;7753;10608	4702;5404;7753;10608
A0A9R0EGX2;A0A2H1W8B9	A0A9R0EGX2;A0A2H1W8B9	3;3	3;3	3;3			tr|A0A9R0EGX2|A0A9R0EGX2_SPOFR Uncharacterized protein LOC118264799 OS=Spodoptera frugiperda OX=7108 GN=LOC118264799 PE=4 SV=1;tr|A0A2H1W8B9|A0A2H1W8B9_SPOFR SFRICE_014577 OS=Spodoptera frugiperda OX=7108 GN=SFRICE_014577 PE=4 SV=1	2	3	3	3	3	3	3	3.8	3.8	3.8	107.79	939	939;939	0	8.9169	3.8	3910900	3910900	88885	88885	3				287	856;2170;3341	True;True;True	866;2197;3383	1065;2742;4222	1597;4197;6422	1597;4197;6422
A0A2H1W8K1	A0A2H1W8K1	3	3	3			tr|A0A2H1W8K1|A0A2H1W8K1_SPOFR Prefoldin subunit 5 OS=Spodoptera frugiperda OX=7108 GN=LOC118269996 PE=3 SV=1	1	3	3	3	3	3	3	28.6	28.6	28.6	17.673	161	161	0	43.393	28.6	53025000	53025000	7575000	7575000	5				288	535;3354;4347	True;True;True	542;3397;4418	672;4278;5618	1003;6548;6549;8507;8508	1003;6549;8508
A0A2H1W8L2	A0A2H1W8L2	7	7	7			tr|A0A2H1W8L2|A0A2H1W8L2_SPOFR Dynactin subunit 2 OS=Spodoptera frugiperda OX=7108 GN=LOC118269162 PE=3 SV=1	1	7	7	7	7	7	7	26.7	26.7	26.7	41.314	371	371	0	26.63	26.7	140110000	140110000	7783900	7783900	8				289	176;2952;3025;3679;4240;4728;5714	True;True;True;True;True;True;True	180;2990;3064;3729;4309;4803;5803	235;3735;3823;4701;5440;5441;6114;7341	347;5706;5836;7179;8228;8229;9312;11203	347;5706;5836;7179;8229;9312;11203
A0A2H1W8L9	A0A2H1W8L9	12	12	12			tr|A0A2H1W8L9|A0A2H1W8L9_SPOFR DnaJ homolog subfamily A member 2 OS=Spodoptera frugiperda OX=7108 GN=SFRICE015690.2 PE=3 SV=1	1	12	12	12	12	12	12	47.5	47.5	47.5	45.013	404	404	0	56.118	47.5	331220000	331220000	15056000	15056000	18				290	1079;1447;1735;1738;1865;2062;2437;3629;4084;4265;5680;5690	True;True;True;True;True;True;True;True;True;True;True;True	1096;1468;1759;1762;1890;2089;2470;3678;4148;4334;5769;5779	1364;1870;2211;2214;2359;2594;3079;4640;5234;5471;7303;7313	2052;2868;2869;3351;3355;3585;3586;3931;4728;7096;7945;7946;8272;8273;8274;11146;11147;11160	2052;2868;3351;3355;3586;3931;4728;7096;7946;8273;11146;11160
A0A9R0DEA4;A0A2H1W8N5	A0A9R0DEA4;A0A2H1W8N5	12;12	12;12	12;12			tr|A0A9R0DEA4|A0A9R0DEA4_SPOFR Ribonucleoside-diphosphate reductase subunit M2 OS=Spodoptera frugiperda OX=7108 GN=LOC118275970 PE=3 SV=1;tr|A0A2H1W8N5|A0A2H1W8N5_SPOFR SFRICE_000148 OS=Spodoptera frugiperda OX=7108 GN=SFRICE_000148 PE=3 SV=1	2	12	12	12	12	12	12	42	42	42	43.817	376	376;376	0	112.58	42	293060000	293060000	13321000	13321000	26				291	109;727;745;762;1306;1612;1645;1860;3254;3269;4025;5197	True;True;True;True;True;True;True;True;True;True;True;True	112;736;754;771;1327;1633;1667;1668;1885;3296;3311;4087;5280	142;911;912;932;953;1697;2061;2100;2101;2354;4102;4103;4120;5168;6703;6704	204;1361;1362;1363;1364;1365;1396;1429;1430;2604;2605;3136;3197;3198;3199;3576;3577;3578;3579;6245;6246;6266;7848;7849;10232;10233	204;1363;1396;1429;2604;3136;3199;3577;6245;6266;7849;10233	24	80
A0A2H1W8R0	A0A2H1W8R0	1	1	1			tr|A0A2H1W8R0|A0A2H1W8R0_SPOFR COP9 signalosome complex subunit 2 OS=Spodoptera frugiperda OX=7108 GN=LOC118275954 PE=3 SV=1	1	1	1	1	1	1	1	2.9	2.9	2.9	51.252	444	444	0	3.2339	2.9	3660900	3660900	159170	159170	2				292	4657	TRUE	4732	6026	9191;9192	9191
A0A9R0D571;A0A2H1W8R1	A0A9R0D571;A0A2H1W8R1	1;1	1;1	1;1			tr|A0A9R0D571|A0A9R0D571_SPOFR Pyrroline-5-carboxylate reductase OS=Spodoptera frugiperda OX=7108 GN=LOC118269571 PE=3 SV=1;tr|A0A2H1W8R1|A0A2H1W8R1_SPOFR Pyrroline-5-carboxylate reductase OS=Spodoptera frugiperda OX=7108 GN=SFRICE_020610 PE=3 SV=1	2	1	1	1	1	1	1	3.6	3.6	3.6	29.169	275	275;275	0.0057554	1.4473	3.6	38127000	38127000	3177300	3177300	1				293	3300	TRUE	3342	4170	6348	6348
A0A2H1W8U6	A0A2H1W8U6	22	22	22			tr|A0A2H1W8U6|A0A2H1W8U6_SPOFR RNA helicase OS=Spodoptera frugiperda OX=7108 GN=LOC118281599 PE=3 SV=1	1	22	22	22	22	22	22	50.9	50.9	50.9	50.4	442	442	0	111.89	50.9	1228600000	1228600000	43877000	43877000	48				294	710;1206;1882;2017;2027;2315;2584;2585;2684;2695;3296;3649;3726;3764;3765;4271;4642;5013;5432;5454;5597;5598	True;True;True;True;True;True;True;True;True;True;True;True;True;True;True;True;True;True;True;True;True;True	719;1225;1907;2043;2053;2345;2619;2620;2720;2731;3338;3698;3776;3816;3817;4340;4717;5095;5519;5541;5685;5686	892;1564;2376;2540;2555;2931;2932;3265;3266;3267;3388;3401;3402;4166;4665;4756;4807;4808;4809;5478;6009;6485;6999;7000;7026;7027;7196;7197	1320;2376;3611;3612;3848;3849;3869;3870;4508;4509;4510;5003;5004;5005;5006;5007;5008;5009;5010;5180;5202;5203;6344;7135;7136;7137;7249;7318;7319;7320;7321;8281;8282;9167;9902;9903;9904;9905;10689;10690;10691;10724;10725;10726;10727;10979;10980;10981	1320;2376;3611;3849;3869;4510;5009;5010;5180;5202;6344;7136;7249;7318;7321;8282;9167;9904;10689;10727;10979;10981
A0A2H1W935	A0A2H1W935	3	3	3			tr|A0A2H1W935|A0A2H1W935_SPOFR Tubulin gamma chain OS=Spodoptera frugiperda OX=7108 GN=LOC118275941 PE=3 SV=1	1	3	3	3	3	3	3	6.1	6.1	6.1	51.335	456	456	0	3.7351	6.1	8654100	8654100	376260	376260	4				295	567;1003;3345	True;True;True	575;1020;3387	711;1274;4226	1061;1918;1919;6426	1061;1918;6426
A0A2H1W996	A0A2H1W996	4	4	4			tr|A0A2H1W996|A0A2H1W996_SPOFR UV excision repair protein RAD23 OS=Spodoptera frugiperda OX=7108 GN=LOC118267122 PE=3 SV=1	1	4	4	4	4	4	4	33.7	33.7	33.7	34.928	315	315	0	19.969	33.7	56615000	56615000	5146900	5146900	5				296	557;565;907;4822	True;True;True;True	565;573;918;4899	698;708;709;1128;6241	1040;1058;1059;1683;9515	1040;1059;1683;9515
A0A2H1W9G5;A0A9E8JXQ2;A0A2H1V0P5	A0A2H1W9G5	3;1;1	2;1;1	2;1;1			tr|A0A2H1W9G5|A0A2H1W9G5_SPOFR thioredoxin-dependent peroxiredoxin OS=Spodoptera frugiperda OX=7108 GN=LOC118268238 PE=2 SV=1	3	3	2	2	3	2	2	11.3	7.3	7.3	27.743	247	247;227;227	0	3.7028	11.3	9258900	9258900	712220	712220	2				297	3603;4279;4886	False;True;True	3652;4348;4966	4613;5487;6318	7056;7057;8291;9641	7056;8291;9641
A0A9R0F0W6;A0A9R0EXW2;A0A2H1W9J5	A0A9R0F0W6;A0A9R0EXW2;A0A2H1W9J5	3;3;3	3;3;3	3;3;3			tr|A0A9R0F0W6|A0A9R0F0W6_SPOFR [histone H3]-trimethyl-L-lysine(4) demethylase OS=Spodoptera frugiperda OX=7108 GN=LOC118280611 PE=3 SV=1;tr|A0A9R0EXW2|A0A9R0EXW2_SPOFR [histone H3]-trimethyl-L-lysine(4) demethylase OS=Spodoptera frugiperda OX=7108 GN=LOC11	3	3	3	3	3	3	3	2.5	2.5	2.5	173.97	1548	1548;1602;1603	0	2.9561	2.5	36994000	36994000	440410	440410	3				298	288;309;4560	True;True;True	292;313;4634	371;392;5882	541;567;8894	541;567;8894
A0A2H1W9M2	A0A2H1W9M2	4	4	4			tr|A0A2H1W9M2|A0A2H1W9M2_SPOFR DDB1- and CUL4-associated factor 7 OS=Spodoptera frugiperda OX=7108 GN=LOC118265273 PE=4 SV=1	1	4	4	4	4	4	4	17.8	17.8	17.8	39.817	353	353	0	21.352	17.8	68766000	68766000	4584400	4584400	5				299	2026;2149;2913;5656	True;True;True;True	2052;2176;2950;5744	2554;2715;3689;7266	3868;4142;5651;5652;11072	3868;4142;5652;11072
A0A9R0D393;A0A2H1W9Q6;A0A9R0D372;A0A9R0EJG8	A0A9R0D393;A0A2H1W9Q6;A0A9R0D372;A0A9R0EJG8	3;3;2;2	3;3;2;2	3;3;2;2			tr|A0A9R0D393|A0A9R0D393_SPOFR Set1/Ash2 histone methyltransferase complex subunit ASH2 isoform X1 OS=Spodoptera frugiperda OX=7108 GN=LOC118268230 PE=4 SV=1;tr|A0A2H1W9Q6|A0A2H1W9Q6_SPOFR SFRICE_007878 OS=Spodoptera frugiperda OX=7108 GN=SFRICE_007878 PE=	4	3	3	3	3	3	3	8.2	8.2	8.2	64.645	573	573;573;347;361	0	3.9484	8.2	34006000	34006000	1030500	1030500	3				300	4486;4687;5694	True;True;True	4558;4762;5783	5794;6063;7318	8768;9248;11166	8768;9248;11166
A0A9R0D1G2;A0A9R0F3F7;A0A9R0EIJ7;A0A9R0D1H7;A0A9R0D1A1;A0A2H1W9Y2	A0A9R0D1G2;A0A9R0F3F7;A0A9R0EIJ7;A0A9R0D1H7;A0A9R0D1A1;A0A2H1W9Y2	1;1;1;1;1;1	1;1;1;1;1;1	1;1;1;1;1;1			tr|A0A9R0D1G2|A0A9R0D1G2_SPOFR Cyclic AMP response element-binding protein B isoform X6 OS=Spodoptera frugiperda OX=7108 GN=LOC118267123 PE=4 SV=1;tr|A0A9R0F3F7|A0A9R0F3F7_SPOFR Cyclic AMP response element-binding protein B isoform X5 OS=Spodoptera frugipe	6	1	1	1	1	1	1	3.4	3.4	3.4	28.134	261	261;263;265;285;287;289	0.0015576	2.0775	3.4	15302000	15302000	2550400	2550400	1				301	5321	TRUE	5404	6855	10470	10470
A0A9R0D8B4;A0A2H1WA27	A0A9R0D8B4;A0A2H1WA27	17;17	17;17	17;17			tr|A0A9R0D8B4|A0A9R0D8B4_SPOFR arginine--tRNA ligase OS=Spodoptera frugiperda OX=7108 GN=LOC118271999 PE=3 SV=1;tr|A0A2H1WA27|A0A2H1WA27_SPOFR arginine--tRNA ligase OS=Spodoptera frugiperda OX=7108 GN=SFRICE_006884 PE=3 SV=1	2	17	17	17	17	17	17	26.7	26.7	26.7	77.739	682	682;682	0	40.785	26.7	421030000	421030000	10269000	10269000	24				302	601;1022;1238;1359;1478;1579;1724;1899;2493;2981;3164;3581;3769;4854;4948;5161;5825	True;True;True;True;True;True;True;True;True;True;True;True;True;True;True;True;True	609;1039;1258;1380;1499;1600;1748;1924;2527;3019;3205;3630;3821;4932;5028;5244;5915	751;1297;1612;1763;1907;2026;2197;2396;3148;3770;3992;3993;4590;4813;6280;6397;6651;7471;7472;7473	1116;1956;2454;2707;2944;2945;3091;3332;3641;4823;4824;5757;6090;6091;7030;7325;9566;9567;9771;10136;10137;11389;11390;11391	1116;1956;2454;2707;2944;3091;3332;3641;4824;5757;6091;7030;7325;9567;9771;10137;11389
A0A2H1WAY0	A0A2H1WAY0	19	19	19			tr|A0A2H1WAY0|A0A2H1WAY0_SPOFR Nuclear valosin-containing protein-like OS=Spodoptera frugiperda OX=7108 GN=LOC118267430 PE=3 SV=1	1	19	19	19	19	19	19	32.7	32.7	32.7	94.407	865	865	0	122.62	32.7	311180000	311180000	7978900	7978900	27				303	8;583;1100;1115;1210;1211;1908;2179;2492;2717;2846;3026;4050;4558;5007;5097;5350;5449;5600	True;True;True;True;True;True;True;True;True;True;True;True;True;True;True;True;True;True;True	8;591;1117;1132;1229;1230;1933;2206;2526;2753;2883;3065;4113;4632;5089;5179;5433;5536;5688	10;729;1393;1411;1412;1568;1569;2406;2751;3147;3427;3607;3824;5194;5195;5880;6479;6579;6884;7021;7199	15;1084;1085;2112;2139;2140;2141;2380;2381;2382;3653;3654;4210;4822;5242;5530;5837;7879;7880;7881;8892;9895;10037;10512;10513;10718;10983	15;1084;2112;2141;2380;2381;3653;4210;4822;5242;5530;5837;7880;8892;9895;10037;10513;10718;10983
A0A2H1WAZ4;A0A9R0DPQ0;A0A9R0DPE5;A0A9R0DPU3;A0A9R0DPN1;A0A9R0DPJ9;A0A9R0DP03;A0A9R0DQ43;A0A9R0EWN1;A0A9R0EUW8;A0A9R0DQA7;A0A9R0DPK4;A0A9R0EVJ5;A0A9R0DPC9;A0A9R0DPE8;A0A9R0DPT0;A0A9R0DPL8;A0A9R0DQ31;A0A9R0DNZ2;A0A9R0DPI9;A0A9R0ETZ9;A0A9R0DPF9;A0A9R0EVK3;A0A9R0DPQ3;A0A9R0EUX2;A0A9R0DPM3;A0A9R0DP29;A0A9R0EWP4;A0A9R0EU14;A0A9R0DPM9;A0A9R0EVB8;A0A9R0DQD2;A0A9R0EUX7;A0A9R0EVK9;A0A9R0DPR1;A0A9R0DPF5;A0A…	A0A2H1WAZ4;A0A9R0DPQ0;A0A9R0DPE5;A0A9R0DPU3;A0A9R0DPN1;A0A9R0DPJ9;A0A9R0DP03;A0A9R0DQ43;A0A9R0EWN1;A0A9R0EUW8;A0A9R0DQA7;A0A9R0DPK4;A0A9R0EVJ5;A0A9R0DPC9;A0A9R0DPE8;A0A9R0DPT0;A0A9R0DPL8;A0A9R0DQ31;A0A9R0DNZ2;A0A9R0DPI9;A0A9R0ETZ9;A0A9R0DPF9;A0A9R0EVK3;A0A9R0DPQ3;A0A9R0EUX2;A0A9R0DPM3;A0A9R0DP29;A0A9R0EWP4;A0A9R0EU14;A0A9R0DPM9;A0A9R0EVB8;A0A9R0DQD2;A0A9R0EUX7;A0A9R0EVK9;A0A9R0DPR1;A0A9R0DPF5;A0A…	2;2;2;2;2;2;2;2;2;2;2;2;2;2;2;2;2;2;2;2;2;2;2;2;2;2;2;2;2;2;2;2;2;2;2;2;2;2;2;2;2;2;2;2;2	2;2;2;2;2;2;2;2;2;2;2;2;2;2;2;2;2;2;2;2;2;2;2;2;2;2;2;2;2;2;2;2;2;2;2;2;2;2;2;2;2;2;2;2;2	2;2;2;2;2;2;2;2;2;2;2;2;2;2;2;2;2;2;2;2;2;2;2;2;2;2;2;2;2;2;2;2;2;2;2;2;2;2;2;2;2;2;2;2;2			tr|A0A2H1WAZ4|A0A2H1WAZ4_SPOFR SFRICE_003832 OS=Spodoptera frugiperda OX=7108 GN=SFRICE_003832 PE=3 SV=1;tr|A0A9R0DPQ0|A0A9R0DPQ0_SPOFR Titin isoform X25 OS=Spodoptera frugiperda OX=7108 GN=LOC118265809 PE=3 SV=1;tr|A0A9R0DPE5|A0A9R0DPE5_SPOFR Titin isofor	45	2	2	2	2	2	2	0.9	0.9	0.9	378.99	3219	3219;3893;3976;3980;4034;4034;4063;4063;4092;4121;4121;4121;4150;4150;4150;4179;4179;4237;4237;4237;4266;3918;3893;3458;3889;3487;3516;3603;3632;3661;3690;3690;3719;3744;3744;3748;3748;3773;3777;3806;3831;3835;3835;3864;4266	0	3.1888	0.9	51454000	51454000	364920	364920	3				304	878;5174	True;True	888;5257	1091;6667	1629;1630;10157	1629;10157
A0A2H1WB26;A0A9R0EKI8;A0A9R0D583	A0A2H1WB26;A0A9R0EKI8;A0A9R0D583	1;1;1	1;1;1	1;1;1			tr|A0A2H1WB26|A0A2H1WB26_SPOFR SFRICE_037322 (Fragment) OS=Spodoptera frugiperda OX=7108 GN=SFRICE_037322 PE=4 SV=1;tr|A0A9R0EKI8|A0A9R0EKI8_SPOFR Uncharacterized protein LOC118269558 isoform X2 OS=Spodoptera frugiperda OX=7108 GN=LOC118269558 PE=4 SV=1;tr	3	1	1	1	1	1	1	7.7	7.7	7.7	29.367	272	272;639;879	0	2.2422	7.7	11495000	11495000	957880	957880	1				305	1870	TRUE	1895	2364	3593	3593
A0A2H1WB73;A0A9R0EEG8;A0A9R0CU19	A0A2H1WB73;A0A9R0EEG8;A0A9R0CU19	1;1;1	1;1;1	1;1;1			tr|A0A2H1WB73|A0A2H1WB73_SPOFR non-specific serine/threonine protein kinase OS=Spodoptera frugiperda OX=7108 GN=SFRICE_010927 PE=4 SV=1;tr|A0A9R0EEG8|A0A9R0EEG8_SPOFR non-specific serine/threonine protein kinase OS=Spodoptera frugiperda OX=7108 GN=LOC11826	3	1	1	1	1	1	1	3.4	3.4	3.4	58.03	534	534;585;589	0.009589	1.2094	3.4	23803000	23803000	881610	881610	1				306	5946	TRUE	6042	7625	11612	11612
A0A2H1WBG9;A0A9R0DYJ1	A0A2H1WBG9;A0A9R0DYJ1	15;15	1;1	0;0			tr|A0A2H1WBG9|A0A2H1WBG9_SPOFR Actin, muscle-type A2 OS=Spodoptera frugiperda OX=7108 GN=LOC118268744 PE=3 SV=1;tr|A0A9R0DYJ1|A0A9R0DYJ1_SPOFR Actin, muscle-type A2-like OS=Spodoptera frugiperda OX=7108 GN=LOC126911542 PE=3 SV=1	2	15	1	0	15	1	0	43.9	4.3	0	41.802	376	376;438	0	4.9723	43.9	323030000	323030000	16151000	16151000	2				307	177;559;560;855;864;929;930;2045;2188;2375;2674;2702;4924;5201;5969	False;False;False;False;False;False;False;False;False;False;False;False;False;False;True	181;567;568;865;874;941;942;2071;2215;2216;2406;2710;2738;5004;5284;6065	236;700;701;702;1064;1074;1075;1076;1154;1155;2576;2762;2763;3007;3377;3378;3409;6366;6367;6708;6709;7652	348;1042;1043;1044;1045;1046;1047;1048;1590;1591;1592;1593;1594;1595;1596;1607;1608;1609;1610;1611;1612;1720;1721;1722;3905;3906;3907;4232;4233;4234;4633;4634;4635;5164;5165;5166;5167;5214;9722;9723;9724;9725;9726;9727;9728;9729;9730;9731;10238;10239;10240;11644;11645	348;1043;1047;1592;1608;1721;1722;3905;4234;4633;5167;5214;9726;10240;11644	25	45
A0A2H1WBJ7	A0A2H1WBJ7	13	13	1			tr|A0A2H1WBJ7|A0A2H1WBJ7_SPOFR SFRICE_017426 (Fragment) OS=Spodoptera frugiperda OX=7108 GN=SFRICE_017426 PE=4 SV=1	1	13	13	1	13	13	1	14.3	14.3	0.6	141.13	1243	1243	0	27.509	14.3	174600000	174600000	2645500	2645500	18				308	761;1401;1659;1880;2441;2612;3565;3635;4923;5003;5160;5476;5843	True;True;True;True;True;True;True;True;True;True;True;True;True	770;1422;1682;1905;2474;2647;3613;3684;5003;5085;5243;5563;5936	952;1816;2118;2374;3083;3298;4518;4646;6365;6474;6650;7054;7498	1427;1428;2790;3223;3608;3609;4732;5050;6881;7105;9721;9883;9884;10135;10778;10779;10780;11420;11421	1427;2790;3223;3609;4732;5050;6881;7105;9721;9883;10135;10780;11421
A0A9R0DA01;A0A9R0ENH8;A0A2H1WBP4	A0A9R0DA01;A0A9R0ENH8;A0A2H1WBP4	3;3;3	3;3;3	3;3;3			tr|A0A9R0DA01|A0A9R0DA01_SPOFR Sequestosome-1 isoform X2 OS=Spodoptera frugiperda OX=7108 GN=LOC118273082 PE=4 SV=1;tr|A0A9R0ENH8|A0A9R0ENH8_SPOFR Sequestosome-1 isoform X1 OS=Spodoptera frugiperda OX=7108 GN=LOC118273082 PE=4 SV=1;tr|A0A2H1WBP4|A0A2H1WBP4	3	3	3	3	3	3	3	7.1	7.1	7.1	62.541	577	577;582;596	0	17.386	7.1	59264000	59264000	2370600	2370600	4				309	845;1156;4911	True;True;True	855;1174;4991	1052;1462;6349;6350	1576;2220;9697;9698	1576;2220;9698
A0A2H1WC07	A0A2H1WC07	10	10	10			tr|A0A2H1WC07|A0A2H1WC07_SPOFR DNA replication licensing factor MCM2 OS=Spodoptera frugiperda OX=7108 GN=LOC118277869 PE=4 SV=1	1	10	10	10	10	10	10	14.4	14.4	14.4	100.33	883	883	0	11.238	14.4	31265000	31265000	694790	694790	9				310	43;809;1400;1842;1853;2123;2566;5127;5228;5713	True;True;True;True;True;True;True;True;True;True	43;819;1421;1867;1878;2150;2601;5210;5311;5802	51;1006;1815;2334;2347;2682;3238;6612;6745;7340	67;1506;2789;3554;3568;4061;4955;10085;10294;11202	67;1506;2789;3554;3568;4061;4955;10085;10294;11202
A0A2H1WC16	A0A2H1WC16	8	8	8			tr|A0A2H1WC16|A0A2H1WC16_SPOFR Beta-parvin OS=Spodoptera frugiperda OX=7108 GN=LOC118262643 PE=3 SV=1	1	8	8	8	8	8	8	25	25	25	42.015	368	368	0	14.128	25	116580000	116580000	6476600	6476600	8				311	701;807;944;2417;3244;3380;4705;5008	True;True;True;True;True;True;True;True	710;817;956;2449;3286;3423;4780;5090	883;1003;1170;1171;3057;4091;4305;6088;6480	1307;1503;1741;1742;4704;6233;6585;9278;9896	1307;1503;1741;4704;6233;6585;9278;9896
A0A2H1WCE3	A0A2H1WCE3	1	1	1			tr|A0A2H1WCE3|A0A2H1WCE3_SPOFR SFRICE_018043 OS=Spodoptera frugiperda OX=7108 GN=LOC118273687 PE=3 SV=1	1	1	1	1	1	1	1	2.1	2.1	2.1	40.065	340	340	0.0096154	1.2135	2.1	149900000	149900000	7138000	7138000	7				312	2577	TRUE	2612	3257	4984;4985;4986;4987;4988;4989;4990	4988
A0A2H1WCK4	A0A2H1WCK4	8	8	8			tr|A0A2H1WCK4|A0A2H1WCK4_SPOFR Eukaryotic translation initiation factor 3 subunit F OS=Spodoptera frugiperda OX=7108 GN=LOC118267366 PE=3 SV=1	1	8	8	8	8	8	8	50.9	50.9	50.9	30.141	277	277	0	41.409	50.9	101320000	101320000	6754400	6754400	10				313	325;841;1118;1204;1278;2020;2370;5603	True;True;True;True;True;True;True;True	329;851;1135;1223;1299;2046;2401;5691	414;1048;1415;1561;1562;1658;2544;3001;7203	604;1572;2145;2367;2368;2529;3855;4622;4623;4624;4625;10987	604;1572;2145;2368;2529;3855;4622;10987
A0A9R0CU72;A0A2H1WCU2	A0A9R0CU72;A0A2H1WCU2	18;18	18;18	18;18			tr|A0A9R0CU72|A0A9R0CU72_SPOFR Bifunctional phosphoribosylaminoimidazole carboxylase/phosphoribosylaminoimidazole succinocarboxamide synthetase OS=Spodoptera frugiperda OX=7108 GN=LOC118262367 PE=3 SV=1;tr|A0A2H1WCU2|A0A2H1WCU2_SPOFR SFRICE_003980 (Fragmen	2	18	18	18	18	18	18	45	45	45	46.989	424	424;819	0	65.382	45	1224000000	1224000000	51000000	51000000	34				314	514;625;902;1186;1495;1625;2263;2488;2693;2945;3109;3624;3991;3992;4302;4381;4514;5773	True;True;True;True;True;True;True;True;True;True;True;True;True;True;True;True;True;True	521;633;913;1204;1516;1646;2292;2522;2729;2982;3149;3673;4050;4051;4371;4452;4587;5863	646;786;1122;1538;1539;1926;1927;2076;2869;3142;3143;3398;3727;3924;4635;5123;5124;5125;5552;5656;5828;7412;7413	955;956;957;958;959;960;1175;1176;1177;1676;1677;2337;2338;2966;2967;2968;2969;2970;3164;4426;4427;4812;4813;5199;5697;5995;7089;7787;7788;7789;7790;8417;8556;8820;11289;11290	958;1175;1676;2337;2966;3164;4426;4812;5199;5697;5995;7089;7787;7789;8417;8556;8820;11290
A0A2H1WD30;A0A9R0DNN6	A0A2H1WD30;A0A9R0DNN6	13;13	13;13	13;13			tr|A0A2H1WD30|A0A2H1WD30_SPOFR Hypoxia up-regulated protein 1 (Fragment) OS=Spodoptera frugiperda OX=7108 GN=SFRICE015252.2 PE=3 SV=1;tr|A0A9R0DNN6|A0A9R0DNN6_SPOFR Hypoxia up-regulated protein 1 OS=Spodoptera frugiperda OX=7108 GN=LOC126910758 PE=3 SV=1	2	13	13	13	13	13	13	21.5	21.5	21.5	102.5	917	917;923	0	21.267	21.5	180380000	180380000	3468800	3468800	18				315	122;211;350;716;725;755;1338;1547;2047;2596;3584;5091;5419	True;True;True;True;True;True;True;True;True;True;True;True;True	125;215;355;725;734;764;1359;1568;2073;2631;3633;5173;5505	158;281;443;444;898;908;946;1732;1990;2578;3278;4593;6573;6983	223;420;421;422;423;648;649;1334;1355;1419;1420;2658;3045;3909;5023;7033;10031;10669;10670	223;420;648;1334;1355;1420;2658;3045;3909;5023;7033;10031;10669
A0A2H1WDD7;A0A9R0D0T0	A0A2H1WDD7;A0A9R0D0T0	3;3	3;3	3;3			tr|A0A2H1WDD7|A0A2H1WDD7_SPOFR Transcription initiation factor TFIID subunit 2 OS=Spodoptera frugiperda OX=7108 GN=SFRICE_005569 PE=3 SV=1;tr|A0A9R0D0T0|A0A9R0D0T0_SPOFR Transcription initiation factor TFIID subunit 2 OS=Spodoptera frugiperda OX=7108 GN=LO	2	3	3	3	3	3	3	6.2	6.2	6.2	137.8	1203	1203;1209	0	2.3132	6.2	4848900	4848900	80815	80815	3				316	40;1081;2288	True;True;True	40;1098;2317	48;1366;2897	61;2054;4459	61;2054;4459
A0A9R0D0D3;A0A2H1WDD9	A0A9R0D0D3;A0A2H1WDD9	1;1	1;1	1;1			tr|A0A9R0D0D3|A0A9R0D0D3_SPOFR Golgi reassembly-stacking protein 2 OS=Spodoptera frugiperda OX=7108 GN=LOC118266690 PE=3 SV=1;tr|A0A2H1WDD9|A0A2H1WDD9_SPOFR SFRICE_015795 OS=Spodoptera frugiperda OX=7108 GN=SFRICE_015795 PE=3 SV=1	2	1	1	1	1	1	1	2	2	2	49.005	456	456;456	0.0057471	1.436	2	0	0	0	0	1				317	2992	TRUE	3030	3783	5780	5780
A0A9R0D0W5;A0A2H1WDF9;A0A9R0E5D8;A0A9R0F1F5	A0A9R0D0W5;A0A2H1WDF9;A0A9R0E5D8;A0A9R0F1F5	5;5;5;4	5;5;5;4	5;5;5;4			tr|A0A9R0D0W5|A0A9R0D0W5_SPOFR Brahma-associated protein of 60 kDa isoform X2 OS=Spodoptera frugiperda OX=7108 GN=LOC118266861 PE=4 SV=1;tr|A0A2H1WDF9|A0A2H1WDF9_SPOFR SFRICE_031346 OS=Spodoptera frugiperda OX=7108 GN=SFRICE_031346 PE=4 SV=1;tr|A0A9R0E5D8|	4	5	5	5	5	5	5	15.1	15.1	15.1	58.487	529	529;529;532;500	0	12.728	15.1	57154000	57154000	1905100	1905100	6				318	863;1906;2367;4178;5115	True;True;True;True;True	873;1931;2398;4246;5197	1073;2403;2995;2996;5362;6599	1606;3649;4608;4609;8125;10064	1606;3649;4608;8125;10064
A0A2H1WDM1	A0A2H1WDM1	52	52	52			tr|A0A2H1WDM1|A0A2H1WDM1_SPOFR Cullin-associated NEDD8-dissociated protein 1 OS=Spodoptera frugiperda OX=7108 GN=LOC118274220 PE=3 SV=1	1	52	52	52	52	52	52	58.7	58.7	58.7	137.87	1254	1254	0	278.19	58.7	1939000000	1939000000	26561000	26561000	111				320	2;3;22;371;505;513;529;623;659;661;685;789;808;837;842;1202;1366;1379;1386;1481;1559;1623;1710;2060;2083;2147;2217;2281;2930;2959;3003;3030;3159;3372;3763;3825;3920;4106;4190;4484;4593;4773;4779;5030;5067;5232;5306;5314;5496;5542;5558;5593	True;True;True;True;True;True;True;True;True;True;True;True;True;True;True;True;True;True;True;True;True;True;True;True;True;True;True;True;True;True;True;True;True;True;True;True;True;True;True;True;True;True;True;True;True;True;True;True;True;True;True;True	2;3;22;378;512;520;536;631;667;669;694;798;818;847;852;1221;1387;1400;1407;1502;1580;1644;1734;2087;2110;2174;2245;2310;2967;2997;3041;3069;3200;3415;3815;3882;3979;4172;4259;4556;4668;4849;4855;5112;5149;5315;5389;5397;5583;5629;5645;5680	2;3;4;27;471;472;636;645;666;783;826;828;859;860;983;1004;1005;1043;1044;1049;1558;1559;1770;1785;1796;1910;2005;2074;2180;2592;2622;2713;2808;2889;2890;3709;3743;3795;3828;3985;3986;4296;4806;4928;5039;5261;5380;5381;5382;5792;5955;6169;6177;6503;6546;6750;6751;6837;6838;6847;7078;7132;7152;7190;7191	2;3;4;5;6;37;688;689;942;951;952;953;954;991;992;993;994;995;996;997;1172;1228;1230;1231;1280;1281;1282;1472;1473;1474;1475;1476;1504;1505;1566;1567;1573;2364;2365;2715;2716;2717;2743;2759;2948;3065;3066;3161;3162;3311;3312;3929;3976;3977;3978;4140;4317;4318;4319;4320;4448;4449;4450;5676;5716;5717;5718;5719;5720;5721;5799;5842;5843;6078;6079;6080;6571;7317;7516;7668;7985;7986;8147;8148;8149;8766;…	2;3;37;688;942;954;994;1172;1228;1230;1282;1475;1505;1566;1573;2365;2716;2743;2759;2948;3065;3162;3311;3929;3978;4140;4318;4449;5676;5720;5799;5842;6079;6571;7317;7516;7668;7986;8147;8766;9088;9397;9412;9927;9996;10308;10446;10457;10816;10889;10924;10972
A0A2H1WDQ7	A0A2H1WDQ7	31	2	2			tr|A0A2H1WDQ7|A0A2H1WDQ7_SPOFR SFRICE_022593 (Fragment) OS=Spodoptera frugiperda OX=7108 GN=SFRICE_022593 PE=4 SV=1	1	31	2	2	31	2	2	41.1	4.1	4.1	70.852	632	632	0	17.645	41.1	2142500000	2142500000	56382000	56382000	9				321	155;446;447;647;751;1027;1028;1072;1298;1299;1305;1318;1319;1320;1720;2132;2551;2721;2722;2998;2999;3895;3896;4140;4167;4250;4578;4887;4888;5799;5924	False;False;False;False;False;False;False;False;False;False;False;False;False;False;False;False;False;False;False;False;False;False;False;True;False;False;False;False;True;False;False	158;453;454;655;760;1044;1045;1089;1319;1320;1326;1339;1340;1341;1744;2159;2585;2586;2757;2758;3036;3037;3954;3955;4207;4235;4319;4653;4967;4968;5889;6018;6019	197;566;567;568;811;941;1302;1303;1304;1356;1688;1689;1695;1696;1711;1712;1713;2193;2692;3218;3219;3220;3431;3432;3433;3434;3435;3789;3790;3791;5010;5011;5012;5013;5014;5015;5309;5349;5455;5914;6319;6320;6321;6322;7442;7598;7599	269;830;831;832;833;834;835;1210;1405;1406;1407;1408;1409;1410;1411;1412;1413;1961;1962;1963;1964;2044;2586;2587;2588;2589;2590;2591;2592;2593;2594;2595;2602;2603;2624;2625;2626;2627;3326;3327;3328;4072;4073;4074;4075;4932;4933;4934;5247;5248;5249;5250;5251;5252;5790;5791;5792;5793;7635;7636;7637;7638;7639;7640;8050;8051;8106;8251;8252;8959;9642;9643;9644;9645;9646;9647;9648;9649;9650;9651;9652;1…	269;831;835;1210;1409;1962;1963;2044;2590;2595;2602;2624;2625;2626;3328;4072;4933;5247;5250;5790;5793;7635;7637;8050;8106;8251;8959;9643;9646;11332;11581	27;28	385;406
A0A2H1WDX4	A0A2H1WDX4	3	3	2			tr|A0A2H1WDX4|A0A2H1WDX4_SPOFR RNA helicase OS=Spodoptera frugiperda OX=7108 GN=LOC118273207 PE=3 SV=1	1	3	3	2	3	3	2	8.6	8.6	5.7	47.749	421	421	0	5.0023	8.6	2083200	2083200	83328	83328	4				322	645;959;3070	True;True;True	653;972;3109	809;1188;3877	1207;1769;5915;5916	1207;1769;5915
A0A2H1WE80	A0A2H1WE80	3	3	3			tr|A0A2H1WE80|A0A2H1WE80_SPOFR SFRICE_014130 OS=Spodoptera frugiperda OX=7108 GN=LOC118280960 PE=4 SV=1	1	3	3	3	3	3	3	5.7	5.7	5.7	84.194	740	740	0	5.128	5.7	6188500	6188500	150940	150940	4				323	1571;2096;4662	True;True;True	1592;2123;4737	2018;2638;6031	3083;3998;3999;9199	3083;3999;9199
A0A9R0EFU5;A0A2H1WED4	A0A9R0EFU5;A0A2H1WED4	2;2	2;2	2;2			tr|A0A9R0EFU5|A0A9R0EFU5_SPOFR Uncharacterized protein LOC118262740 OS=Spodoptera frugiperda OX=7108 GN=LOC118262740 PE=4 SV=1;tr|A0A2H1WED4|A0A2H1WED4_SPOFR SFRICE_007191 OS=Spodoptera frugiperda OX=7108 GN=SFRICE_007191 PE=4 SV=1	2	2	2	2	2	2	2	37.8	37.8	37.8	20.365	188	188;188	0	13.752	37.8	5321300	5321300	1330300	1330300	2				324	3107;5354	True;True	3146;5437	3921;6892	5991;10522	5991;10522
A0A2H1WES3	A0A2H1WES3	29	1	1			tr|A0A2H1WES3|A0A2H1WES3_SPOFR SFRICE_001697 (Fragment) OS=Spodoptera frugiperda OX=7108 GN=SFRICE_001697 PE=3 SV=1	1	29	1	1	29	1	1	51	2.3	2.3	95.87	830	830	0.0015198	1.8739	51	47985000	47985000	1142500	1142500	1				326	286;622;733;1011;1038;1212;1428;1453;1635;1844;2030;2193;3011;3314;3332;3622;4111;4453;4556;4758;4836;5169;5287;5302;5468;5540;5609;5660;5666	False;False;False;False;False;False;False;False;False;False;False;False;False;False;False;False;False;False;False;False;True;False;False;False;False;False;False;False;False	290;630;742;1028;1055;1231;1449;1474;1657;1869;2056;2221;3049;3356;3374;3671;4178;4525;4630;4834;4914;5252;5370;5385;5555;5627;5697;5748;5754	369;782;918;1286;1315;1570;1847;1877;1878;2090;2336;2558;2772;3803;4190;4212;4633;5270;5748;5749;5878;6151;6258;6661;6816;6833;7045;7130;7209;7270;7271;7279	539;1171;1373;1941;1984;2383;2384;2832;2888;2889;3182;3183;3556;3873;4243;4244;4245;4246;5812;6372;6373;6405;6406;7084;7085;8002;8694;8695;8696;8889;8890;9373;9538;10151;10414;10439;10762;10763;10886;10887;10995;11077;11078;11095	539;1171;1373;1941;1984;2384;2832;2888;3182;3556;3873;4245;5812;6372;6406;7084;8002;8696;8890;9373;9538;10151;10414;10439;10762;10887;10995;11077;11095
A0A9R0F027;A0A2H1WEZ0;A0A9R0DZN2;A0A9R0EZ72;A0A9R0DYW2;A0A9R0F0B6	A0A9R0F027;A0A2H1WEZ0;A0A9R0DZN2;A0A9R0EZ72;A0A9R0DYW2;A0A9R0F0B6	2;2;2;2;2;2	2;2;2;2;2;2	2;2;2;2;2;2			tr|A0A9R0F027|A0A9R0F027_SPOFR Protein enabled isoform X5 OS=Spodoptera frugiperda OX=7108 GN=LOC118276815 PE=3 SV=1;tr|A0A2H1WEZ0|A0A2H1WEZ0_SPOFR SFRICE_009698 (Fragment) OS=Spodoptera frugiperda OX=7108 GN=SFRICE_009698 PE=3 SV=1;tr|A0A9R0DZN2|A0A9R0DZN	6	2	2	2	2	2	2	4.5	4.5	4.5	56.905	531	531;533;613;704;707;709	0	5.0214	4.5	59313000	59313000	3489000	3489000	3				327	504;5958	True;True	511;6054	634;635;7641	940;941;11628	941;11628
A0A9R0DDF3;A0A2H1WF28	A0A9R0DDF3;A0A2H1WF28	3;3	3;3	3;3			tr|A0A9R0DDF3|A0A9R0DDF3_SPOFR protein-serine/threonine phosphatase OS=Spodoptera frugiperda OX=7108 GN=LOC118275354 PE=3 SV=1;tr|A0A2H1WF28|A0A2H1WF28_SPOFR protein-serine/threonine phosphatase OS=Spodoptera frugiperda OX=7108 GN=SFRICE_011467 PE=3 SV=1	2	3	3	3	3	3	3	10.2	10.2	10.2	55.974	490	490;511	0	4.094	10.2	17386000	17386000	668690	668690	3				328	10;1992;3956	True;True;True	10;2018;4015	13;2515;5079	18;3812;7724	18;3812;7724
Q962Q8;A0A9R0DIR0;A0A2H1WF70	Q962Q8;A0A9R0DIR0;A0A2H1WF70	2;2;2	2;2;2	2;2;2			sp|Q962Q8|RS21_SPOFR Small ribosomal subunit protein eS21 OS=Spodoptera frugiperda OX=7108 GN=RpS21 PE=3 SV=1;tr|A0A9R0DIR0|A0A9R0DIR0_SPOFR 40S ribosomal protein S21 OS=Spodoptera frugiperda OX=7108 GN=LOC118280046 PE=3 SV=1;tr|A0A2H1WF70|A0A2H1WF70_SPOFR	3	2	2	2	2	2	2	22.9	22.9	22.9	9.0883	83	83;83;461	0	3.9553	22.9	76229000	76229000	19057000	19057000	2				329	3709;3845	True;True	3759;3904	4735;4954	7219;7558	7219;7558
A0A2H1WFA2	A0A2H1WFA2	40	40	33			tr|A0A2H1WFA2|A0A2H1WFA2_SPOFR Heat shock 70 kDa protein cognate 4 (Fragment) OS=Spodoptera frugiperda OX=7108 GN=SFRICE003522.2 PE=2 SV=1	1	40	40	33	40	40	33	64.6	64.6	56.5	71.507	653	653	0	323.31	64.6	50459000000	50459000000	1576800000	1576800000	158				330	413;473;707;812;1179;1336;1450;1455;1461;1734;2233;2234;2397;2567;2602;2726;3284;3492;3670;3739;3740;3834;3835;3836;3842;3859;4044;4045;4371;4656;4798;4841;4860;4861;4993;5205;5241;5364;5689;5808	True;True;True;True;True;True;True;True;True;True;True;True;True;True;True;True;True;True;True;True;True;True;True;True;True;True;True;True;True;True;True;True;True;True;True;True;True;True;True;True	420;480;716;822;1197;1357;1471;1476;1482;1758;2262;2263;2428;2602;2637;2762;3326;3538;3719;3789;3790;3791;3892;3893;3894;3895;3901;3918;4106;4107;4108;4442;4731;4874;4919;4938;4939;5074;5075;5288;5324;5448;5778;5898	523;524;525;526;527;598;599;889;1009;1528;1730;1873;1881;1888;2209;2210;2834;2835;2836;3032;3033;3239;3240;3286;3439;3440;4152;4432;4690;4770;4771;4772;4773;4940;4941;4942;4943;4944;4945;4951;4968;5187;5188;5189;5645;6024;6025;6196;6197;6198;6263;6264;6286;6287;6456;6457;6458;6459;6713;6760;6921;7312;7452;7453;7454	759;760;761;762;763;764;765;766;767;768;769;770;872;873;874;875;1314;1315;1513;1514;2320;2655;2873;2874;2875;2876;2877;2893;2894;2895;2896;2909;2910;2911;2912;2913;2914;2915;2916;2917;2918;2919;3348;3349;3350;4366;4367;4368;4369;4370;4371;4372;4373;4374;4375;4669;4670;4956;4957;4958;5035;5036;5256;5257;5258;5259;5260;6323;6765;6766;6767;6768;7168;7265;7266;7267;7268;7269;7270;7537;7538;7539;7540;…	761;872;1314;1514;2320;2655;2876;2894;2910;3350;4366;4374;4670;4956;5035;5256;6323;6768;7168;7266;7270;7537;7544;7546;7553;7582;7872;7874;8544;9190;9441;9547;9580;9584;9861;10248;10321;10588;11159;11361	30;31;32;33	62;123;128;238
A0A2H1WFB2	A0A2H1WFB2	1	1	1			tr|A0A2H1WFB2|A0A2H1WFB2_SPOFR SFRICE_002495 OS=Spodoptera frugiperda OX=7108 GN=SFRICE_002495 PE=4 SV=1	1	1	1	1	1	1	1	7.9	7.9	7.9	18.954	164	164	0.0056738	1.3703	7.9	345330000	345330000	38370000	38370000	1				331	2979	TRUE	3017	3768	5755	5755	34	12
A0A2H1WFG5	A0A2H1WFG5	3	1	1			tr|A0A2H1WFG5|A0A2H1WFG5_SPOFR SFRICE_032844 (Fragment) OS=Spodoptera frugiperda OX=7108 GN=SFRICE_032844 PE=4 SV=1	1	3	1	1	3	1	1	44.6	10.9	10.9	18.838	175	175	0	8.0534	44.6	42953000	42953000	7158900	7158900	1				332	495;2182;4497	True;False;False	502;2209;4569	624;2754;5807	915;4213;4214;8788	915;4213;8788
A0A9R0DXD3;A0A9R0EKH5;A0A9R0D595;A0A2H1WFP3;A0A9R0DY74;A0A9R0D5D0;A0A9R0EYH6;A0A9R0EKQ5;A0A9R0D5B5;A0A9R0D5K1;A0A9R0D594;A0A9R0D587	A0A9R0DXD3;A0A9R0EKH5;A0A9R0D595;A0A2H1WFP3;A0A9R0DY74;A0A9R0D5D0;A0A9R0EYH6;A0A9R0EKQ5;A0A9R0D5B5;A0A9R0D5K1;A0A9R0D594;A0A9R0D587	1;1;1;1;1;1;1;1;1;1;1;1	1;1;1;1;1;1;1;1;1;1;1;1	1;1;1;1;1;1;1;1;1;1;1;1			tr|A0A9R0DXD3|A0A9R0DXD3_SPOFR Myocyte-specific enhancer factor 2 isoform X12 OS=Spodoptera frugiperda OX=7108 GN=LOC118269549 PE=4 SV=1;tr|A0A9R0EKH5|A0A9R0EKH5_SPOFR Myocyte-specific enhancer factor 2 isoform X11 OS=Spodoptera frugiperda OX=7108 GN=LOC11	12	1	1	1	1	1	1	3.5	3.5	3.5	43.23	399	399;401;402;403;404;405;406;407;408;409;410;411	0.0096286	1.2168	3.5	31899000	31899000	3189900	3189900	1				333	2198	TRUE	2226	2778	4254	4254
A0A9R0DU80;A0A9R0DUE4;A0A9R0EW76;A0A9R0EX27;A0A9R0EY06;A0A9R0DTX5;A0A9R0EZ39;A0A2H1WFS9;A0A9R0DUY1;A0A9R0DTJ3;A0A9R0DU90;A0A9R0DU89;A0A9R0DUK2;A0A9R0EXQ4;A0A9R0EW81;A0A9R0DV27;A0A9R0DTW3	A0A9R0DU80;A0A9R0DUE4;A0A9R0EW76;A0A9R0EX27;A0A9R0EY06;A0A9R0DTX5;A0A9R0EZ39;A0A2H1WFS9;A0A9R0DUY1;A0A9R0DTJ3;A0A9R0DU90;A0A9R0DU89;A0A9R0DUK2;A0A9R0EXQ4;A0A9R0EW81;A0A9R0DV27;A0A9R0DTW3	5;5;5;5;5;5;5;5;5;5;5;4;4;4;4;4;4	5;5;5;5;5;5;5;5;5;5;5;4;4;4;4;4;4	5;5;5;5;5;5;5;5;5;5;5;4;4;4;4;4;4			tr|A0A9R0DU80|A0A9R0DU80_SPOFR non-specific serine/threonine protein kinase OS=Spodoptera frugiperda OX=7108 GN=LOC118262253 PE=3 SV=1;tr|A0A9R0DUE4|A0A9R0DUE4_SPOFR non-specific serine/threonine protein kinase OS=Spodoptera frugiperda OX=7108 GN=LOC118262	17	5	5	5	5	5	5	4.8	4.8	4.8	155.42	1397	1397;1344;1393;1068;1072;1078;1391;1328;1390;1387;1337;1007;1336;1013;1326;1017;1332	0	4.1047	4.8	69732000	69732000	1010600	1010600	7				334	290;1869;1936;3931;4193	True;True;True;True;True	294;1894;1962;3990;4262	373;2363;2447;5051;5386;5387	543;3592;3718;3719;7687;8153;8154	543;3592;3718;7687;8153
A0A9R0EUN9;A0A2H1WFV2;A0A9R0DMN2;A0A9R0DN19;A0A9R0DMU9	A0A9R0EUN9;A0A2H1WFV2;A0A9R0DMN2;A0A9R0DN19;A0A9R0DMU9	2;2;2;2;2	2;2;2;2;2	2;2;2;2;2			tr|A0A9R0EUN9|A0A9R0EUN9_SPOFR E3 ubiquitin-protein transferase RMND5B isoform X5 OS=Spodoptera frugiperda OX=7108 GN=LOC126910724 PE=4 SV=1;tr|A0A2H1WFV2|A0A2H1WFV2_SPOFR E3 ubiquitin-protein ligase RMND5A isoform X4 OS=Spodoptera frugiperda OX=7108 GN=LO	5	2	2	2	2	2	2	7.5	7.5	7.5	40.516	373	373;392;394;397;399	0	4.1131	7.5	8370300	8370300	380470	380470	2				335	293;2925	True;True	297;2962	376;3703	546;5667	546;5667
A0A9R0EVW3;A0A9R0EW54;A0A9R0DQQ5;A0A9R0DQP3;A0A9R0DR94;A0A9R0EUH9;A0A9R0DQN4;A0A2H1WFZ5;E9KGW9	A0A9R0EVW3;A0A9R0EW54;A0A9R0DQQ5;A0A9R0DQP3;A0A9R0DR94;A0A9R0EUH9;A0A9R0DQN4;A0A2H1WFZ5	15;15;15;15;15;15;15;15;2	15;15;15;15;15;15;15;15;2	15;15;15;15;15;15;15;15;2			tr|A0A9R0EVW3|A0A9R0EVW3_SPOFR Bifunctional glutamate/proline--tRNA ligase isoform X13 OS=Spodoptera frugiperda OX=7108 GN=LOC118275379 PE=3 SV=1;tr|A0A9R0EW54|A0A9R0EW54_SPOFR Bifunctional glutamate/proline--tRNA ligase isoform X10 OS=Spodoptera frugiperd	9	15	15	15	15	15	15	12.8	12.8	12.8	166.73	1490	1490;1558;1563;1625;1630;1631;1698;1698;134	0	23.147	12.8	265590000	265590000	2855900	2855900	17				336	63;162;237;515;649;836;933;1515;2013;2435;3270;3502;4753;5455;5800	True;True;True;True;True;True;True;True;True;True;True;True;True;True;True	65;165;241;522;657;846;945;1536;2039;2468;3312;3548;4829;5542;5890	78;204;313;647;813;1042;1158;1949;2536;3077;4121;4444;6146;7028;7443	109;276;461;961;1212;1565;1725;2997;3843;4726;6267;6268;6783;9362;10728;11333;11334	109;276;461;961;1212;1565;1725;2997;3843;4726;6268;6783;9362;10728;11334
A0A2H1WG58	A0A2H1WG58	2	2	2			tr|A0A2H1WG58|A0A2H1WG58_SPOFR Protein dpy-30 homolog OS=Spodoptera frugiperda OX=7108 GN=LOC118265515 PE=3 SV=1	1	2	2	2	2	2	2	31.6	31.6	31.6	12.576	114	114	0	4.9031	31.6	1592400	1592400	227480	227480	2				337	1308;4397	True;True	1329;4468	1699;5679	2607;8588	2607;8588
A0A2H1WG78	A0A2H1WG78	7	7	7			tr|A0A2H1WG78|A0A2H1WG78_SPOFR Small ribosomal subunit protein uS2 OS=Spodoptera frugiperda OX=7108 GN=LOC126912518 PE=3 SV=1	1	7	7	7	7	7	7	34.9	34.9	34.9	33.483	307	307	0	48.152	34.9	270060000	270060000	24551000	24551000	9				338	586;587;1304;1409;3263;4405;4613	True;True;True;True;True;True;True	594;595;1325;1430;3305;4476;4688	733;734;1694;1825;1826;4112;5687;5976	1089;1090;1091;2601;2802;2803;6255;8599;9117	1090;1091;2601;2803;6255;8599;9117
A0A9R0ERI9;A0A2H1WG91	A0A9R0ERI9;A0A2H1WG91	1;1	1;1	1;1			tr|A0A9R0ERI9|A0A9R0ERI9_SPOFR Uncharacterized protein LOC118278301 OS=Spodoptera frugiperda OX=7108 GN=LOC118278301 PE=4 SV=1;tr|A0A2H1WG91|A0A2H1WG91_SPOFR SFRICE_011273 OS=Spodoptera frugiperda OX=7108 GN=SFRICE_011273 PE=4 SV=1	2	1	1	1	1	1	1	7.8	7.8	7.8	27.286	258	258;258	0	2.8408	7.8	117590	117590	9045.6	9045.6	1				339	4855	TRUE	4933	6281	9568	9568
A0A2H1WHA1;A0A9R0D7L3;A0A2H1WGV2;A0A1S6Q5K8	A0A2H1WHA1;A0A9R0D7L3;A0A2H1WGV2;A0A1S6Q5K8	7;7;7;6	7;7;7;6	7;7;7;6			tr|A0A2H1WHA1|A0A2H1WHA1_SPOFR Proteasome subunit alpha type (Fragment) OS=Spodoptera frugiperda OX=7108 GN=SFRICE_030666 PE=3 SV=1;tr|A0A9R0D7L3|A0A9R0D7L3_SPOFR Proteasome subunit alpha type OS=Spodoptera frugiperda OX=7108 GN=LOC118271282 PE=3 SV=1;tr|A	4	7	7	7	7	7	7	39.1	39.1	39.1	27.887	253	253;276;1148;199	0	6.68	39.1	185370000	185370000	10904000	10904000	8				340	2158;3143;3170;3217;3794;4472;5989	True;True;True;True;True;True;True	2185;3184;3211;3259;3849;4544;6085	2726;3967;4000;4061;4892;5775;7705	4167;6057;6099;6100;6188;7470;8742;11752	4167;6057;6100;6188;7470;8742;11752
A0A2H1WH12	A0A2H1WH12	11	11	11			tr|A0A2H1WH12|A0A2H1WH12_SPOFR Elongation factor 1-beta OS=Spodoptera frugiperda OX=7108 GN=LOC118271654 PE=3 SV=1	1	11	11	11	11	11	11	63.2	63.2	63.2	24.497	223	223	0	120.82	63.2	745290000	745290000	46581000	46581000	25				341	433;2539;2840;3602;4829;4830;4915;4930;4947;5052;5823	True;True;True;True;True;True;True;True;True;True;True	440;2573;2877;3651;4907;4908;4995;5010;5027;5134;5913	550;3205;3599;3600;4612;6250;6251;6354;6373;6374;6396;6529;7469	807;4918;5519;5520;5521;5522;7053;7054;7055;9525;9526;9527;9528;9702;9703;9737;9738;9739;9769;9770;9964;9965;9966;9967;11387	807;4918;5521;7053;9525;9528;9702;9739;9770;9965;11387
A0A9R0EXA6;A0A2H1WH17	A0A9R0EXA6;A0A2H1WH17	5;5	5;5	5;5			tr|A0A9R0EXA6|A0A9R0EXA6_SPOFR Integrator complex subunit 4 OS=Spodoptera frugiperda OX=7108 GN=LOC118262289 PE=4 SV=1;tr|A0A2H1WH17|A0A2H1WH17_SPOFR SFRICE_020427 OS=Spodoptera frugiperda OX=7108 GN=SFRICE_020427 PE=4 SV=1	2	5	5	5	5	5	5	7.1	7.1	7.1	105.33	961	961;1015	0	8.283	7.1	25835000	25835000	574100	574100	4				342	1057;3219;3253;3617;5451	True;True;True;True;True	1074;3261;3295;3666;5538	1339;4064;4101;4628;7023	2020;6192;6244;7077;10721	2020;6192;6244;7077;10721
A0A2H1WH29;A0AA96EMT6;A0A7U1CKW1	A0A2H1WH29;A0AA96EMT6;A0A7U1CKW1	9;7;7	9;7;7	8;6;6			tr|A0A2H1WH29|A0A2H1WH29_SPOFR Heat shock protein (Fragment) OS=Spodoptera frugiperda OX=7108 GN=SFRICE022535.2 PE=2 SV=1;tr|A0AA96EMT6|A0AA96EMT6_SPOFR Small heat shock protein 20.2 OS=Spodoptera frugiperda OX=7108 PE=2 SV=1;tr|A0A7U1CKW1|A0A7U1CKW1_SPOFR	3	9	9	8	9	9	8	71	71	60.8	20.147	176	176;176;176	0	57.167	71	265780000	265780000	29531000	29531000	15				343	1594;3230;3510;3984;4218;4745;5758;5759;5831	True;True;True;True;True;True;True;True;True	1615;3272;3558;4043;4287;4821;5848;5849;5921	2043;4076;4457;5115;5413;6137;7395;7396;7480	3111;6208;6209;6800;7778;8189;8190;8191;9350;9351;9352;11269;11270;11399;11400	3111;6208;6800;7778;8189;9350;11269;11270;11400
A0A2H1WH41	A0A2H1WH41	1	1	1			tr|A0A2H1WH41|A0A2H1WH41_SPOFR Proteasome subunit alpha type OS=Spodoptera frugiperda OX=7108 GN=LOC118273101 PE=3 SV=1	1	1	1	1	1	1	1	4.4	4.4	4.4	27.855	249	249	0	4.4374	4.4	31712000	31712000	2882900	2882900	1				344	312	TRUE	316	397	572	572
A0A2H1WHD1	A0A2H1WHD1	49	2	2			tr|A0A2H1WHD1|A0A2H1WHD1_SPOFR SFRICE_022541 OS=Spodoptera frugiperda OX=7108 GN=SFRICE_022541 PE=4 SV=1	1	49	2	2	49	2	2	43.9	2.9	2.9	180.01	1648	1648	0	33.349	43.9	287360000	287360000	3341400	3341400	2				345	32;68;174;265;316;318;319;324;341;584;660;668;777;1010;1017;1275;1555;1684;1713;1730;1761;1857;1861;2009;2067;2069;2100;2783;2899;2986;3099;3271;3304;3360;3361;3562;3720;3876;3932;3957;4048;4089;4125;5078;5084;5225;5289;5426;5972	False;False;False;False;False;False;False;False;False;False;False;False;False;False;False;False;False;False;False;False;False;False;False;False;False;False;False;False;False;False;False;False;False;False;False;False;False;True;False;True;False;False;False;False;False;False;False;False;False	32;70;178;269;320;322;323;328;346;592;668;676;786;1027;1034;1296;1576;1708;1737;1754;1785;1882;1886;2035;2094;2096;2127;2820;2936;3024;3138;3313;3346;3403;3404;3610;3770;3935;3991;4016;4111;4153;4192;5160;5166;5308;5372;5513;6068	39;83;233;344;401;403;404;413;434;730;731;827;840;969;1284;1285;1292;1654;2001;2147;2148;2183;2204;2244;2351;2355;2532;2601;2603;2652;3512;3513;3674;3776;3912;4122;4175;4176;4284;4285;4515;4750;4987;5052;5053;5080;5192;5239;5284;6560;6566;6740;6818;6819;6993;7655	50;114;342;499;500;501;502;579;581;582;583;584;585;586;603;634;1086;1087;1229;1247;1248;1249;1455;1939;1940;1950;2524;3060;3061;3265;3266;3267;3315;3339;3340;3406;3407;3408;3573;3580;3836;3941;3944;4018;5387;5388;5633;5767;5768;5981;6269;6355;6356;6555;6556;6557;6878;7242;7609;7688;7689;7690;7691;7725;7877;7952;7953;7954;8017;10014;10020;10282;10417;10418;10682;11648	50;114;342;500;579;584;586;603;634;1087;1229;1249;1455;1940;1950;2524;3060;3267;3315;3340;3408;3573;3580;3836;3941;3944;4018;5388;5633;5768;5981;6269;6356;6555;6556;6878;7242;7609;7690;7725;7877;7952;8017;10014;10020;10282;10418;10682;11648
Q26486;A0A9R0ENT5;A0A2H1WHJ0	Q26486;A0A9R0ENT5;A0A2H1WHJ0	8;8;8	8;8;8	8;8;8			sp|Q26486|FKBP4_SPOFR 46 kDa FK506-binding nuclear protein OS=Spodoptera frugiperda OX=7108 GN=FKBP46 PE=2 SV=1;tr|A0A9R0ENT5|A0A9R0ENT5_SPOFR FK506-binding protein OS=Spodoptera frugiperda OX=7108 GN=LOC118273994 PE=3 SV=1;tr|A0A2H1WHJ0|A0A2H1WHJ0_SPOFR F	3	8	8	8	8	8	8	29.1	29.1	29.1	45.809	412	412;413;413	0	41.776	29.1	255400000	255400000	12770000	12770000	9				346	1374;1531;2405;2830;3698;3705;5753;6004	True;True;True;True;True;True;True;True	1395;1552;2436;2867;3748;3755;5843;6100	1778;1968;3042;3585;4724;4731;7388;7721	2730;3019;4683;5497;7206;7214;7215;11261;11769	2730;3019;4683;5497;7206;7215;11261;11769
A0A2H1WHK5;A0A9R0EBM1	A0A2H1WHK5;A0A9R0EBM1	2;2	2;2	2;2			tr|A0A2H1WHK5|A0A2H1WHK5_SPOFR SFRICE_010568 (Fragment) OS=Spodoptera frugiperda OX=7108 GN=SFRICE_010568 PE=4 SV=1;tr|A0A9R0EBM1|A0A9R0EBM1_SPOFR Elongation factor-like GTPase 1 OS=Spodoptera frugiperda OX=7108 GN=LOC118273875 PE=4 SV=1	2	2	2	2	2	2	2	3.2	3.2	3.2	100.73	886	886;1060	0.0015291	1.9064	3.2	26324000	26324000	674980	674980	1				347	3243;5299	True;True	3285;5382	4090;6830	6232;10436	6232;10436
A0A2H1WHU2	A0A2H1WHU2	2	2	2			tr|A0A2H1WHU2|A0A2H1WHU2_SPOFR Integrator complex subunit 9 OS=Spodoptera frugiperda OX=7108 GN=LOC118278270 PE=4 SV=1	1	2	2	2	2	2	2	3.6	3.6	3.6	69.555	647	647	0	3.5056	3.6	35135000	35135000	1254800	1254800	4				348	49;2066	True;True	51;2093	61;2600	83;3938;3939;3940	83;3938
A0A2H1WI81	A0A2H1WI81	1	1	1			tr|A0A2H1WI81|A0A2H1WI81_SPOFR SFRICE_041643 OS=Spodoptera frugiperda OX=7108 GN=SFRICE_041643 PE=4 SV=1	1	1	1	1	1	1	1	4.5	4.5	4.5	37.702	334	334	0.0015699	2.2026	4.5	5993200	5993200	260580	260580	1				349	2923	TRUE	2960	3700;3701	5664;5665	5664
A0A9R0EG06;A0A2H1WI92	A0A9R0EG06;A0A2H1WI92	1;1	1;1	1;1			tr|A0A9R0EG06|A0A9R0EG06_SPOFR Uncharacterized protein LOC118263519 OS=Spodoptera frugiperda OX=7108 GN=LOC118263519 PE=4 SV=1;tr|A0A2H1WI92|A0A2H1WI92_SPOFR SFRICE_010361 OS=Spodoptera frugiperda OX=7108 GN=SFRICE_010361 PE=4 SV=1	2	1	1	1	1	1	1	3.6	3.6	3.6	36.569	335	335;335	0	2.4618	3.6	0	0	0	0	1				350	4288	TRUE	4357	5534	8397	8397
A0A2H1WII2	A0A2H1WII2	3	3	3			tr|A0A2H1WII2|A0A2H1WII2_SPOFR SFRICE_036626 OS=Spodoptera frugiperda OX=7108 GN=LOC118277932 PE=3 SV=1	1	3	3	3	3	3	3	13.7	13.7	13.7	31.102	291	291	0	4.3821	13.7	32863000	32863000	2527900	2527900	3				351	222;467;2622	True;True;True	226;474;2657	294;591;3315	440;861;5074	440;861;5074
A0A9R0E7T9;A0A9R0E905;A0A2H1WIL8;A0A9R0E935;A0A9R0E7U8;A0A9R0F6F6;A0A9R0E9J1;A0A9R0F553;A0A9R0F324;A0A9R0E8Z5;A0A9R0E9P5;A0A9R0F3U9	A0A9R0E7T9;A0A9R0E905;A0A2H1WIL8;A0A9R0E935;A0A9R0E7U8;A0A9R0F6F6;A0A9R0E9J1;A0A9R0F553;A0A9R0F324;A0A9R0E8Z5;A0A9R0E9P5;A0A9R0F3U9	18;18;18;18;18;18;18;18;18;18;18;18	18;18;18;18;18;18;18;18;18;18;18;18	18;18;18;18;18;18;18;18;18;18;18;18			tr|A0A9R0E7T9|A0A9R0E7T9_SPOFR Ubiquitin carboxyl-terminal hydrolase 7 OS=Spodoptera frugiperda OX=7108 GN=LOC126912510 PE=3 SV=1;tr|A0A9R0E905|A0A9R0E905_SPOFR Ubiquitin carboxyl-terminal hydrolase 7 OS=Spodoptera frugiperda OX=7108 GN=LOC126912510 PE=3 S	12	18	18	18	18	18	18	18.6	18.6	18.6	125.62	1086	1086;1114;1154;1155;1155;1159;1159;1160;1160;1160;1164;1165	0	44.63	18.6	258600000	258600000	4239300	4239300	24				352	843;942;1597;1629;2171;2212;2498;2639;2777;3194;3367;3789;4127;4207;4389;5234;5374;5552	True;True;True;True;True;True;True;True;True;True;True;True;True;True;True;True;True;True	853;954;1618;1650;2198;2240;2532;2675;2814;3236;3410;3844;4194;4276;4460;5317;5458;5639	1050;1168;2046;2081;2743;2798;2799;3153;3338;3506;4030;4291;4886;4887;5288;5402;5668;6753;6932;7145	1574;1739;3114;3170;4198;4290;4291;4292;4293;4294;4829;4830;5108;5379;6137;6564;7464;7465;8021;8176;8571;10311;10604;10912	1574;1739;3114;3170;4198;4291;4830;5108;5379;6137;6564;7465;8021;8176;8571;10311;10604;10912
A0A9R0DJH3;A0A9R0DIX7;A0A2H1WJJ8;A0A9R0DII1	A0A9R0DJH3;A0A9R0DIX7;A0A2H1WJJ8;A0A9R0DII1	31;31;31;31	31;31;31;31	31;31;31;31			tr|A0A9R0DJH3|A0A9R0DJH3_SPOFR Importin-7 isoform X3 OS=Spodoptera frugiperda OX=7108 GN=LOC118279335 PE=4 SV=1;tr|A0A9R0DIX7|A0A9R0DIX7_SPOFR Importin-7 isoform X2 OS=Spodoptera frugiperda OX=7108 GN=LOC118279335 PE=4 SV=1;tr|A0A2H1WJJ8|A0A2H1WJJ8_SPOFR S	4	31	31	31	31	31	31	45	45	45	120.33	1044	1044;1048;1064;1068	0	187.18	45	1481600000	1481600000	29632000	29632000	43				353	568;585;768;800;1341;1524;1975;2282;2388;2418;2655;2793;2856;2962;3201;3249;3282;3685;3841;3998;4114;4183;5125;5202;5459;5521;5557;5752;5886;5898;5922	True;True;True;True;True;True;True;True;True;True;True;True;True;True;True;True;True;True;True;True;True;True;True;True;True;True;True;True;True;True;True	576;593;777;810;1362;1545;2001;2311;2419;2450;2691;2830;2893;3000;3243;3291;3324;3735;3900;4057;4181;4251;5208;5285;5546;5608;5644;5842;5979;5991;6016	712;732;959;960;995;1735;1961;2495;2891;3021;3022;3058;3357;3524;3620;3746;4041;4097;4150;4708;4950;5133;5134;5273;5368;6610;6710;7032;7108;7151;7386;7387;7549;7568;7595	1062;1088;1441;1442;1443;1493;2668;3012;3787;4451;4650;4651;4652;4653;4654;4705;5132;5403;5548;5726;6151;6152;6153;6154;6240;6321;7187;7551;7799;7800;7801;8005;8133;10083;10241;10242;10733;10856;10923;11259;11260;11499;11527;11570;11571	1062;1088;1441;1493;2668;3012;3787;4451;4653;4705;5132;5403;5548;5726;6151;6240;6321;7187;7551;7801;8005;8133;10083;10242;10733;10856;10923;11260;11499;11527;11571
A0A2H1WJK6	A0A2H1WJK6	21	1	1			tr|A0A2H1WJK6|A0A2H1WJK6_SPOFR valine--tRNA ligase OS=Spodoptera frugiperda OX=7108 GN=SFRICE_010173 PE=3 SV=1	1	21	1	1	21	1	1	30.9	1.6	1.6	100.57	881	881	0	4.3143	30.9	55899000	55899000	1242200	1242200	3				354	626;847;1146;1417;1574;2583;2624;2706;2729;2932;3132;3295;3418;3445;3598;4437;4519;4561;4722;5195;5255	False;False;False;False;False;False;False;False;False;False;False;False;False;False;False;False;False;False;False;True;False	634;857;1163;1438;1595;2618;2659;2742;2765;2969;3172;3337;3463;3490;3647;4509;4592;4635;4797;5278;5338	787;1054;1450;1836;2021;3264;3317;3413;3443;3711;3954;4164;4165;4347;4375;4608;5726;5833;5834;5883;5884;6106;6701;6779;6780	1178;1578;2200;2818;3086;5002;5076;5077;5220;5263;5678;6036;6341;6342;6343;6641;6642;6643;6682;7049;8654;8828;8829;8830;8895;8896;9303;10228;10229;10230;10359;10360	1178;1578;2200;2818;3086;5002;5077;5220;5263;5678;6036;6341;6642;6682;7049;8654;8828;8896;9303;10229;10360
A0A2H1WJQ0	A0A2H1WJQ0	9	1	1			tr|A0A2H1WJQ0|A0A2H1WJQ0_SPOFR L-lactate dehydrogenase (Fragment) OS=Spodoptera frugiperda OX=7108 GN=SFRICE_024370 PE=3 SV=1	1	9	1	1	9	1	1	60	14.4	14.4	27.478	250	250	0	31.557	60	38351000	38351000	3835100	3835100	3				355	231;1342;3349;3925;3936;3937;4537;5461;5992	True;False;False;False;False;False;False;False;False	235;1363;3392;3984;3995;3996;4610;5548;6088	304;305;1736;1737;4272;4273;5044;5057;5058;5059;5856;7034;7708;7709	450;451;452;2669;2670;6541;6542;6543;7673;7695;7696;7697;7698;7699;8860;10735;10736;11755;11756	451;2670;6543;7673;7695;7699;8860;10736;11755
A0A2H1WJT7	A0A2H1WJT7	3	3	3			tr|A0A2H1WJT7|A0A2H1WJT7_SPOFR 6-pyruvoyl tetrahydrobiopterin synthase OS=Spodoptera frugiperda OX=7108 GN=LOC118277296 PE=3 SV=1	1	3	3	3	3	3	3	23.1	23.1	23.1	19.183	169	169	0	7.5514	23.1	57032000	57032000	5184700	5184700	6				356	1923;3966;5159	True;True;True	1948;4025;5242	2422;5095;5096;5097;6649	3681;3682;7747;7748;7749;10134	3681;7749;10134
A0A9R0D0Z5;A0A9R0D0X7;A0A2H1WK25;A0A9R0D0V4	A0A9R0D0Z5;A0A9R0D0X7;A0A2H1WK25;A0A9R0D0V4	5;5;5;4	5;5;5;4	5;5;5;4			tr|A0A9R0D0Z5|A0A9R0D0Z5_SPOFR Probable protein phosphatase CG10417 isoform X2 OS=Spodoptera frugiperda OX=7108 GN=LOC118266893 PE=3 SV=1;tr|A0A9R0D0X7|A0A9R0D0X7_SPOFR Uncharacterized protein LOC118266893 isoform X1 OS=Spodoptera frugiperda OX=7108 GN=LOC	4	5	5	5	5	5	5	10.8	10.8	10.8	70.124	659	659;665;665;596	0	14.475	10.8	126910000	126910000	4532600	4532600	7				357	4;219;1519;3083;3397	True;True;True;True;True	4;223;1540;3122;3441	5;290;291;1953;3891;4324	7;435;436;437;3001;5939;6613;6614	7;435;3001;5939;6614
A0A2H1WK48;A0A9R0DB00;E9KI00	A0A2H1WK48;A0A9R0DB00	31;30;8	31;30;8	31;30;8			tr|A0A2H1WK48|A0A2H1WK48_SPOFR Alanine--tRNA ligase OS=Spodoptera frugiperda OX=7108 GN=SFRICE_040115 PE=3 SV=1;tr|A0A9R0DB00|A0A9R0DB00_SPOFR Alanine--tRNA ligase OS=Spodoptera frugiperda OX=7108 GN=LOC118273682 PE=3 SV=1	3	31	31	31	31	31	31	40.5	40.5	40.5	114.14	1024	1024;965;234	0	162.33	40.5	1189700000	1189700000	22448000	22448000	42				358	138;224;351;366;404;875;894;1140;1793;1854;1956;2168;2322;2623;2625;2754;3104;3223;3496;3593;3608;3644;4191;4442;4834;5112;5404;5477;5527;5768;6014	True;True;True;True;True;True;True;True;True;True;True;True;True;True;True;True;True;True;True;True;True;True;True;True;True;True;True;True;True;True;True	141;228;356;373;411;885;905;1157;1817;1879;1982;2195;2353;2658;2660;2791;3143;3265;3542;3642;3657;3693;4260;4514;4912;5194;5490;5564;5614;5858;6110	177;296;445;466;511;1087;1113;1442;1443;2278;2348;2473;2740;2941;3316;3318;3473;3918;4068;4437;4602;4603;4618;4657;5383;5731;6256;6596;6967;7055;7115;7407;7736	247;442;650;682;744;745;1625;1661;2191;2192;3462;3463;3569;3570;3756;4192;4193;4522;5075;5078;5310;5988;6196;6775;7043;7044;7063;7122;7123;8150;8659;9535;9536;10061;10646;10647;10781;10782;10864;11284;11793;11794	247;442;650;682;744;1625;1661;2192;3463;3570;3756;4193;4522;5075;5078;5310;5988;6196;6775;7043;7063;7122;8150;8659;9535;10061;10646;10782;10864;11284;11793
A0A9R0D6Z5;A0A2H1WKA2	A0A9R0D6Z5;A0A2H1WKA2	14;14	14;14	14;14			tr|A0A9R0D6Z5|A0A9R0D6Z5_SPOFR 26S proteasome regulatory subunit 10B OS=Spodoptera frugiperda OX=7108 GN=LOC118270701 PE=3 SV=1;tr|A0A2H1WKA2|A0A2H1WKA2_SPOFR SFRICE_025319 OS=Spodoptera frugiperda OX=7108 GN=SFRICE_025319 PE=3 SV=1	2	14	14	14	14	14	14	47.7	47.7	47.7	44.747	396	396;408	0	54.988	47.7	275300000	275300000	12514000	12514000	20				359	344;543;787;1236;1362;1372;1402;1605;1709;2104;2364;2392;4130;5296	True;True;True;True;True;True;True;True;True;True;True;True;True;True	349;550;796;1256;1383;1393;1423;1626;1733;2131;2395;2423;4197;5379	437;682;980;981;1610;1766;1776;1817;2054;2179;2656;2992;3026;5292;6827	637;638;1017;1468;1469;1470;2452;2710;2727;2728;2791;3127;3310;4024;4602;4603;4604;4659;8026;10432	638;1017;1468;2452;2710;2728;2791;3127;3310;4024;4602;4659;8026;10432
A0A2H1WKD7;A0A9R0F0L9;A0A2H1WKG5	A0A2H1WKD7;A0A9R0F0L9;A0A2H1WKG5	2;2;1	2;2;1	2;2;1			tr|A0A2H1WKD7|A0A2H1WKD7_SPOFR RNA helicase OS=Spodoptera frugiperda OX=7108 GN=SFRICE_007001 PE=3 SV=1;tr|A0A9R0F0L9|A0A9R0F0L9_SPOFR RNA helicase OS=Spodoptera frugiperda OX=7108 GN=LOC118269051 PE=3 SV=1;tr|A0A2H1WKG5|A0A2H1WKG5_SPOFR RNA helicase (Frag	3	2	2	2	2	2	2	4.1	4.1	4.1	84.069	763	763;763;264	0	2.5206	4.1	1465100	1465100	36627	36627	2				360	1500;3697	True;True	1521;3747	1934;4723	2979;7205	2979;7205
A0A9R0EKM5;A0A9R0ECX9;A0A9R0D5F3;A0A2H1WKS8	A0A9R0EKM5;A0A9R0ECX9;A0A9R0D5F3;A0A2H1WKS8	7;7;7;7	7;7;7;7	7;7;7;7			tr|A0A9R0EKM5|A0A9R0EKM5_SPOFR Elongin-B isoform X3 OS=Spodoptera frugiperda OX=7108 GN=LOC118269649 PE=4 SV=1;tr|A0A9R0ECX9|A0A9R0ECX9_SPOFR Elongin-B isoform X2 OS=Spodoptera frugiperda OX=7108 GN=LOC118269649 PE=4 SV=1;tr|A0A9R0D5F3|A0A9R0D5F3_SPOFR Elo	4	7	7	7	7	7	7	63.9	63.9	63.9	13.391	119	119;127;133;142	0	29.714	63.9	398830000	398830000	39883000	39883000	11				361	924;947;1251;2719;3543;5075;5711	True;True;True;True;True;True;True	935;959;1272;2755;3591;5157;5800	1148;1174;1627;1628;3429;4494;6556;7338	1711;1746;2482;2483;2484;5244;5245;6851;10010;11199;11200	1711;1746;2484;5244;6851;10010;11199
A0A2H1WKT6;A0A9R0ET10	A0A2H1WKT6;A0A9R0ET10	17;15	17;15	17;15			tr|A0A2H1WKT6|A0A2H1WKT6_SPOFR SFRICE_000817 OS=Spodoptera frugiperda OX=7108 GN=SFRICE_000817 PE=3 SV=1;tr|A0A9R0ET10|A0A9R0ET10_SPOFR 60S ribosomal protein L18 OS=Spodoptera frugiperda OX=7108 GN=LOC118272864 PE=3 SV=1	2	17	17	17	17	17	17	42.4	42.4	42.4	56.769	524	524;761	0	323.31	42.4	5235800000	5235800000	327240000	327240000	63				362	899;981;1352;1437;1919;1943;2120;2792;3068;3363;4133;4584;4587;4588;4629;5178;5359	True;True;True;True;True;True;True;True;True;True;True;True;True;True;True;True;True	910;997;1373;1458;1944;1969;2147;2829;3107;3406;4200;4659;4662;4663;4704;5261;5442	1118;1250;1749;1750;1857;1858;2418;2455;2676;2677;2678;3522;3523;3874;3875;4287;5297;5298;5299;5946;5949;5950;5994;6671;6672;6898;6899;6900;6901;6902;6903	1667;1668;1669;1670;1671;1672;1874;2690;2691;2692;2693;2849;2850;3677;3727;3728;4052;4053;4054;4055;5401;5402;5909;5910;5911;5912;5913;6559;6560;8031;8032;8033;8034;8035;9066;9069;9070;9071;9072;9073;9074;9075;9076;9077;9078;9079;9080;9081;9082;9141;10162;10163;10164;10531;10532;10533;10534;10535;10536;10537;10538;10539;10540	1671;1874;2692;2850;3677;3728;4053;5402;5910;6559;8033;9066;9071;9080;9141;10164;10534
A0A2H1WKY2;Q9GQG6;A0A6M3Z4U2	A0A2H1WKY2;Q9GQG6;A0A6M3Z4U2	46;45;40	46;45;40	45;44;40			tr|A0A2H1WKY2|A0A2H1WKY2_SPOFR Heat shock protein 83 OS=Spodoptera frugiperda OX=7108 GN=SFRICE030031.2 PE=2 SV=1;tr|Q9GQG6|Q9GQG6_SPOFR Heat shock protein 83 OS=Spodoptera frugiperda OX=7108 GN=hsp83 PE=2 SV=1;tr|A0A6M3Z4U2|A0A6M3Z4U2_SPOFR Heat shock pro	3	46	46	45	46	46	45	63.9	63.9	62.9	82.613	717	717;717;717	0	323.31	63.9	20706000000	20706000000	647060000	647060000	151				363	104;313;419;657;658;862;909;946;1052;1053;1103;1104;1105;1165;1198;1199;1239;2019;2038;2097;2136;2150;2167;2205;2294;2295;2400;2562;2755;2756;3093;3102;3572;3849;3943;4409;4410;4491;4568;4729;5386;5862;5863;5891;5997;6028	True;True;True;True;True;True;True;True;True;True;True;True;True;True;True;True;True;True;True;True;True;True;True;True;True;True;True;True;True;True;True;True;True;True;True;True;True;True;True;True;True;True;True;True;True;True	107;317;426;665;666;872;920;958;1069;1070;1120;1121;1122;1183;1217;1218;1259;2045;2064;2124;2163;2177;2194;2233;2324;2325;2431;2597;2792;2793;3132;3141;3620;3908;4002;4480;4481;4563;4642;4643;4804;5470;5471;5955;5956;5984;6093;6124	137;398;534;822;823;824;825;1072;1130;1173;1334;1335;1396;1397;1398;1399;1400;1473;1554;1555;1613;2542;2543;2566;2567;2568;2639;2640;2641;2642;2643;2644;2645;2646;2647;2697;2698;2716;2717;2736;2737;2738;2739;2787;2905;2906;2907;2908;3037;3233;3234;3474;3475;3476;3477;3478;3904;3916;4525;4526;4527;4528;4958;5066;5691;5692;5693;5801;5901;5902;5903;5904;6115;6116;6946;6947;6948;7518;7519;7520;7557;7…	194;195;196;573;574;779;780;1223;1224;1225;1226;1227;1605;1685;1686;1745;2012;2013;2014;2115;2116;2117;2118;2119;2238;2359;2360;2361;2455;3851;3852;3853;3854;3884;3885;3886;3887;3888;3889;3890;3891;4000;4001;4002;4003;4004;4005;4006;4007;4008;4009;4010;4011;4012;4080;4081;4082;4083;4143;4144;4186;4187;4188;4189;4190;4191;4269;4270;4271;4272;4467;4468;4469;4470;4471;4472;4473;4474;4475;4476;4477;4…	195;573;780;1224;1225;1605;1685;1745;2012;2014;2115;2117;2118;2238;2359;2361;2455;3852;3890;4002;4082;4144;4187;4272;4467;4476;4677;4951;5314;5316;5960;5985;6892;7565;7708;8604;8609;8776;8939;9314;10620;11447;11448;11513;11761;11815	35;36;37	93;357;507
A0A2H1WL04	A0A2H1WL04	13	13	13			tr|A0A2H1WL04|A0A2H1WL04_SPOFR 26S proteasome regulatory subunit 6A-B OS=Spodoptera frugiperda OX=7108 GN=LOC118275405 PE=3 SV=1	1	13	13	13	13	13	13	46.5	46.5	46.5	47.696	428	428	0	47.93	46.5	132020000	132020000	4889800	4889800	21				364	408;928;1648;2576;2759;2903;3788;4274;4374;4670;5106;5126;5342	True;True;True;True;True;True;True;True;True;True;True;True;True	415;940;1671;2611;2796;2940;3843;4343;4445;4745;5188;5209;5425	515;1153;2104;3253;3254;3255;3256;3481;3678;4885;5481;5649;6040;6590;6611;6876	749;1718;1719;3202;4977;4978;4979;4980;4981;4982;4983;5320;5638;7463;8285;8548;8549;9211;10053;10084;10501	749;1719;3202;4983;5320;5638;7463;8285;8549;9211;10053;10084;10501
A0A9R0E438;A0A2H1WL05	A0A9R0E438;A0A2H1WL05	2;2	2;2	2;2			tr|A0A9R0E438|A0A9R0E438_SPOFR MOB kinase activator-like 4 OS=Spodoptera frugiperda OX=7108 GN=LOC118267007 PE=4 SV=1;tr|A0A2H1WL05|A0A2H1WL05_SPOFR SFRICE_022984 OS=Spodoptera frugiperda OX=7108 GN=SFRICE_022984 PE=4 SV=1	2	2	2	2	2	2	2	9	9	9	25.503	221	221;221	0.001497	1.801	9	10789000	10789000	829920	829920	2				365	553;3785	True;True	561;3840	694;4882	1033;7459	1033;7459
A0A2H1WLC9	A0A2H1WLC9	4	4	4			tr|A0A2H1WLC9|A0A2H1WLC9_SPOFR 26S proteasome non-ATPase regulatory subunit 12 OS=Spodoptera frugiperda OX=7108 GN=LOC118264598 PE=3 SV=1	1	4	4	4	4	4	4	11.8	11.8	11.8	51.667	450	450	0	7.0596	11.8	8735900	8735900	364000	364000	4				366	2536;2559;4112;4306	True;True;True;True	2570;2594;4179;4375	3202;3228;5271;5556	4910;4945;8003;8423	4910;4945;8003;8423
A0A2H1WLW9;A0A9R0EQQ9;A0A9R0DF94	A0A2H1WLW9;A0A9R0EQQ9;A0A9R0DF94	18;17;16	18;17;16	18;17;16			tr|A0A2H1WLW9|A0A2H1WLW9_SPOFR Regulator of chromosome condensation (Fragment) OS=Spodoptera frugiperda OX=7108 GN=SFRICE_009139 PE=4 SV=1;tr|A0A9R0EQQ9|A0A9R0EQQ9_SPOFR Regulator of chromosome condensation OS=Spodoptera frugiperda OX=7108 GN=LOC118276655	3	18	18	18	18	18	18	49.8	49.8	49.8	63.486	606	606;606;627	0	311.35	49.8	1237000000	1237000000	49479000	49479000	30				367	171;530;917;1348;1349;1683;2631;2671;3376;3747;3897;4243;4795;4987;5152;5218;5501;5786	True;True;True;True;True;True;True;True;True;True;True;True;True;True;True;True;True;True	175;537;928;1369;1370;1707;2666;2707;3419;3798;3956;4312;4871;5068;5235;5301;5588;5876	229;667;1140;1744;1745;2145;2146;3324;3373;4300;4784;4785;5016;5446;6193;6449;6640;6641;6642;6729;7085;7086;7428	338;998;1701;2683;2684;3262;3263;3264;5084;5156;6576;7284;7285;7286;7287;7288;7641;8235;8236;9435;9846;10124;10125;10126;10269;10270;10828;10829;10830;11310	338;998;1701;2683;2684;3263;5084;5156;6576;7285;7641;8235;9435;9846;10124;10270;10830;11310
A0A2H1WLX0;A0A9R0EM54	A0A2H1WLX0;A0A9R0EM54	1;1	1;1	1;1			tr|A0A2H1WLX0|A0A2H1WLX0_SPOFR Nucleoporin NUP188 (Fragment) OS=Spodoptera frugiperda OX=7108 GN=SFRICE_014108 PE=3 SV=1;tr|A0A9R0EM54|A0A9R0EM54_SPOFR Nucleoporin NUP188 OS=Spodoptera frugiperda OX=7108 GN=LOC118272324 PE=3 SV=1	2	1	1	1	1	1	1	1.9	1.9	1.9	89.462	777	777;1831	0.0015152	1.8632	1.9	0	0	0	0	1				368	4734	TRUE	4809	6122	9321	9321
A0A2H1WM00;A0A9R0ETV6;A0A2H1W090;A0A2H1VXY6	A0A2H1WM00;A0A9R0ETV6	8;8;3;3	2;2;1;1	2;2;1;1			tr|A0A2H1WM00|A0A2H1WM00_SPOFR Tubulin beta chain (Fragment) OS=Spodoptera frugiperda OX=7108 GN=SFRICE_032801 PE=3 SV=1;tr|A0A9R0ETV6|A0A9R0ETV6_SPOFR Tubulin beta chain OS=Spodoptera frugiperda OX=7108 GN=LOC118280925 PE=3 SV=1	4	8	2	2	8	2	2	22.8	8.3	8.3	34.274	303	303;451;158;239	0	2.4374	22.8	59747000	59747000	4267600	4267600	5				369	1581;1582;2775;2951;3460;3647;4058;5941	False;False;False;False;True;True;False;False	1602;1603;2812;2988;2989;3505;3696;4122;6036	2028;2029;2030;3502;3503;3733;3734;4390;4663;5207;7619	3093;3094;3095;3096;3097;5375;5376;5704;5705;6698;6699;6700;6701;7133;7898;7899;7900;7901;11603;11604	3093;3095;5376;5704;6700;7133;7901;11604	38	123
A0A9R0DUL3;A0A9R0DUZ1;A0A2H1WMB0	A0A9R0DUL3;A0A9R0DUZ1;A0A2H1WMB0	12;12;12	12;12;12	12;12;12			tr|A0A9R0DUL3|A0A9R0DUL3_SPOFR Chromodomain-helicase-DNA-binding protein 7 isoform X2 OS=Spodoptera frugiperda OX=7108 GN=LOC118273440 PE=4 SV=1;tr|A0A9R0DUZ1|A0A9R0DUZ1_SPOFR Chromodomain-helicase-DNA-binding protein 7 isoform X1 OS=Spodoptera frugiperda	3	12	12	12	12	12	12	5.6	5.6	5.6	416.15	3742	3742;3743;3743	0	120.96	5.6	844630000	844630000	5345700	5345700	17				370	1044;2523;2949;4010;4032;4342;4352;4824;4847;4904;4997;5684	True;True;True;True;True;True;True;True;True;True;True;True	1061;2557;2986;4072;4094;4413;4423;4902;4925;4984;5079;5773	1324;3184;3185;3731;5152;5153;5175;5613;5623;5624;6244;6270;6271;6340;6465;7307	1995;4883;4884;5701;5702;7826;7827;7828;7857;8502;8514;8515;9518;9555;9556;9674;9872;11154	1995;4883;5702;7827;7857;8502;8515;9518;9555;9674;9872;11154
A0A9R0DAT1;A0A2H1WMB6	A0A9R0DAT1;A0A2H1WMB6	9;9	9;9	9;9			tr|A0A9R0DAT1|A0A9R0DAT1_SPOFR WD repeat-containing protein 82 OS=Spodoptera frugiperda OX=7108 GN=LOC118273552 PE=3 SV=1;tr|A0A2H1WMB6|A0A2H1WMB6_SPOFR SFRICE_013273 OS=Spodoptera frugiperda OX=7108 GN=SFRICE_013273 PE=3 SV=1	2	9	9	9	9	9	9	33.3	33.3	33.3	35.217	315	315;371	0	34.03	33.3	119960000	119960000	6664500	6664500	14				371	1821;2866;4175;4782;4783;5445;5770;5877;5936	True;True;True;True;True;True;True;True;True	1846;2903;4243;4858;4859;5532;5860;5970;6031	2310;3633;5358;5359;6180;6181;7016;7017;7409;7540;7613	3516;3517;3518;5571;8121;8122;9420;9421;10711;10712;11286;11482;11483;11484;11596	3516;5571;8121;9420;9421;10711;11286;11483;11596
A0A2H1WMG9	A0A2H1WMG9	1	1	1			tr|A0A2H1WMG9|A0A2H1WMG9_SPOFR COP9 signalosome complex subunit 9 OS=Spodoptera frugiperda OX=7108 GN=LOC118273427 PE=3 SV=1	1	1	1	1	1	1	1	33.9	33.9	33.9	6.5261	59	59	0	4.0156	33.9	2874700	2874700	2874700	2874700	1				372	564	TRUE	572	707	1057	1057
A0A2H1WMK9;A0A9R0F194;A0A2H1UZQ0	A0A2H1WMK9;A0A9R0F194;A0A2H1UZQ0	8;8;7	8;8;7	8;8;7			tr|A0A2H1WMK9|A0A2H1WMK9_SPOFR tRNA (uracil(54)-C(5))-methyltransferase OS=Spodoptera frugiperda OX=7108 GN=SFRICE_027379 PE=3 SV=1;tr|A0A9R0F194|A0A9R0F194_SPOFR tRNA (uracil(54)-C(5))-methyltransferase OS=Spodoptera frugiperda OX=7108 GN=LOC118281786 PE=	3	8	8	8	8	8	8	22.1	22.1	22.1	48.308	435	435;1235;609	0	19.792	22.1	63093000	63093000	2336800	2336800	9				373	115;382;566;1691;2922;3618;3914;5525	True;True;True;True;True;True;True;True	118;389;574;1715;2959;3667;3973;5612	149;150;484;710;2156;3699;4629;5033;7113	213;214;704;1060;3277;5663;7078;7659;10862	213;704;1060;3277;5663;7078;7659;10862
A0A2H1WMR5	A0A2H1WMR5	1	1	1			tr|A0A2H1WMR5|A0A2H1WMR5_SPOFR Isocitrate dehydrogenase [NADP] OS=Spodoptera frugiperda OX=7108 GN=LOC118262464 PE=3 SV=1	1	1	1	1	1	1	1	3	3	3	49.12	434	434	0	3.6051	3	36599000	36599000	1464000	1464000	2				374	5223	TRUE	5306	6737;6738	10279;10280	10279
A0A2H1WMY6;A0A9R0DYC7	A0A2H1WMY6;A0A9R0DYC7	1;1	1;1	1;1			tr|A0A2H1WMY6|A0A2H1WMY6_SPOFR Coatomer subunit delta (Fragment) OS=Spodoptera frugiperda OX=7108 GN=SFRICE_019865 PE=3 SV=1;tr|A0A9R0DYC7|A0A9R0DYC7_SPOFR Coatomer subunit delta OS=Spodoptera frugiperda OX=7108 GN=LOC118276647 PE=3 SV=1	2	1	1	1	1	1	1	3.2	3.2	3.2	41.653	373	373;507	0.0097765	1.2837	3.2	1080100	1080100	49093	49093	1				375	492	TRUE	499	621	905	905
A0A9R0EIG9;A0A2H1WN59;B3TDY4;B3TDY5	A0A9R0EIG9;A0A2H1WN59	12;12;5;2	12;12;5;2	12;12;5;2			tr|A0A9R0EIG9|A0A9R0EIG9_SPOFR Beta-galactosidase OS=Spodoptera frugiperda OX=7108 GN=LOC118266728 PE=3 SV=1;tr|A0A2H1WN59|A0A2H1WN59_SPOFR Beta-galactosidase OS=Spodoptera frugiperda OX=7108 GN=SFRICE_014378 PE=3 SV=1	4	12	12	12	12	12	12	5.7	5.7	5.7	316.11	2843	2843;2865;557;411	0	19.926	5.7	73737000	73737000	554420	554420	14				376	786;1176;1649;2178;2912;2948;3310;3704;4510;5315;5789;5961	True;True;True;True;True;True;True;True;True;True;True;True	795;1194;1672;2205;2949;2985;3352;3754;4583;5398;5879;6057	979;1486;2105;2750;3688;3730;4185;4730;5824;6848;7431;7644	1467;2251;3203;4207;4208;4209;5650;5700;6367;7213;8815;10458;11313;11631;11632	1467;2251;3203;4209;5650;5700;6367;7213;8815;10458;11313;11631
A0A2H1WN88	A0A2H1WN88	68	68	2			tr|A0A2H1WN88|A0A2H1WN88_SPOFR Fatty acid synthase (Fragment) OS=Spodoptera frugiperda OX=7108 GN=SFRICE_016610 PE=4 SV=1	1	68	68	2	68	68	2	39.9	39.9	2	261.59	2454	2454	0	323.31	39.9	1578200000	1578200000	12047000	12047000	95				377	26;126;331;406;432;440;545;617;690;694;804;817;866;871;1171;1230;1268;1578;1679;1760;1897;1978;1988;2035;2042;2151;2242;2745;2796;2809;2890;2892;2921;3037;3114;3381;3382;3401;3407;3411;3427;3464;3500;3592;4069;4192;4492;4507;4525;4562;4650;4750;4973;5026;5196;5264;5400;5411;5488;5524;5532;5586;5623;5788;5819;5827;5892;6013	True;True;True;True;True;True;True;True;True;True;True;True;True;True;True;True;True;True;True;True;True;True;True;True;True;True;True;True;True;True;True;True;True;True;True;True;True;True;True;True;True;True;True;True;True;True;True;True;True;True;True;True;True;True;True;True;True;True;True;True;True;True;True;True;True;True;True;True	26;129;335;413;439;447;552;625;699;703;814;827;876;881;1189;1249;1289;1599;1702;1784;1922;2004;2014;2061;2068;2178;2271;2782;2833;2846;2927;2929;2958;3076;3154;3424;3425;3445;3452;3456;3472;3509;3546;3641;4133;4261;4564;4580;4598;4636;4725;4826;5053;5108;5279;5347;5486;5497;5575;5611;5619;5673;5711;5878;5909;5917;5985;6109	31;32;162;420;421;513;549;558;684;775;871;875;999;1014;1078;1083;1481;1592;1646;2025;2140;2243;2394;2500;2511;2563;2573;2718;2845;3462;3527;3548;3664;3666;3698;3836;3837;3930;4306;4307;4328;4336;4340;4356;4396;4397;4442;4601;5218;5384;5385;5802;5821;5842;5885;6017;6143;6429;6498;6702;6791;6963;6975;7068;7112;7120;7121;7183;7226;7430;7465;7475;7559;7735	41;42;227;228;610;611;747;805;806;817;1019;1154;1155;1294;1298;1498;1522;1614;1619;1620;2246;2414;2511;2512;3090;3257;3404;3405;3638;3793;3794;3795;3808;3879;3897;4145;4388;4389;4390;4391;4392;4393;4394;5295;5410;5432;5433;5615;5617;5662;5857;5858;5859;6003;6586;6587;6618;6629;6633;6653;6654;6710;6711;6781;7042;7915;8151;8152;8778;8779;8780;8781;8782;8809;8842;8897;9176;9359;9814;9815;9922;10231;…	42;228;611;747;805;817;1019;1154;1294;1298;1498;1522;1614;1619;2246;2414;2512;3090;3257;3405;3638;3794;3808;3879;3897;4145;4389;5295;5410;5432;5615;5617;5662;5858;6003;6586;6587;6618;6629;6633;6654;6710;6781;7042;7915;8152;8780;8809;8842;8897;9176;9359;9815;9922;10231;10380;10642;10656;10800;10861;10873;10961;11018;11312;11379;11393;11514;11792
A0A2H1WNA6	A0A2H1WNA6	13	13	13			tr|A0A2H1WNA6|A0A2H1WNA6_SPOFR Calreticulin OS=Spodoptera frugiperda OX=7108 GN=LOC118281274 PE=3 SV=1	1	13	13	13	13	13	13	49.1	49.1	49.1	45.856	399	399	0	134.44	49.1	696380000	696380000	31654000	31654000	17				378	131;747;1155;1525;1666;1928;2086;2807;2851;3027;4263;4628;5444	True;True;True;True;True;True;True;True;True;True;True;True;True	134;756;1173;1546;1689;1954;2113;2844;2888;3066;4332;4703;5531	168;934;1461;1962;2125;2434;2625;2626;3545;3613;3825;5469;5992;5993;7015	235;1398;2219;3013;3233;3234;3704;3981;3982;3983;5428;5539;5838;8270;9139;9140;10710	235;1398;2219;3013;3233;3704;3983;5428;5539;5838;8270;9139;10710
A0A2H1WNJ8	A0A2H1WNJ8	6	6	6			tr|A0A2H1WNJ8|A0A2H1WNJ8_SPOFR Ubiquitin carboxyl-terminal hydrolase OS=Spodoptera frugiperda OX=7108 GN=LOC118265897 PE=3 SV=1	1	6	6	6	6	6	6	15	15	15	55.017	500	500	0	9.8757	15	70822000	70822000	2832900	2832900	5				379	299;448;2440;3408;3424;3808	True;True;True;True;True;True	303;455;2473;3453;3469;3863	382;569;3082;4337;4353;4907	552;836;4731;6630;6650;7489	552;836;4731;6630;6650;7489
A0A2H1WNL7	A0A2H1WNL7	1	1	1			tr|A0A2H1WNL7|A0A2H1WNL7_SPOFR Histone acetyltransferase OS=Spodoptera frugiperda OX=7108 GN=LOC118264162 PE=3 SV=1	1	1	1	1	1	1	1	2.5	2.5	2.5	51.546	442	442	0.0057307	1.4209	2.5	0	0	0	0	1				380	3261	TRUE	3303	4110	6253	6253
A0A2H1WNS6	A0A2H1WNS6	4	4	4			tr|A0A2H1WNS6|A0A2H1WNS6_SPOFR A-kinase anchor protein 1, mitochondrial OS=Spodoptera frugiperda OX=7108 GN=LOC118266851 PE=4 SV=1	1	4	4	4	4	4	4	9.6	9.6	9.6	66.581	603	603	0	23.244	9.6	75948000	75948000	3164500	3164500	3				381	466;2272;4605;4759	True;True;True;True	473;2301;4680;4835	590;2880;5968;6152	860;4439;9108;9374	860;4439;9108;9374
A0A9R0DYJ5;A0A9R0DYY3;A0A2H1WNZ3	A0A9R0DYJ5;A0A9R0DYY3;A0A2H1WNZ3	1;1;1	1;1;1	1;1;1			tr|A0A9R0DYJ5|A0A9R0DYJ5_SPOFR Cytosine-specific methyltransferase OS=Spodoptera frugiperda OX=7108 GN=LOC118268867 PE=3 SV=1;tr|A0A9R0DYY3|A0A9R0DYY3_SPOFR DNA (cytosine-5)-methyltransferase OS=Spodoptera frugiperda OX=7108 GN=LOC118268867 PE=3 SV=1;tr|A0	3	1	1	1	1	1	1	0.9	0.9	0.9	137.65	1216	1216;1442;1442	0.0056577	1.3628	0.9	3133600	3133600	52227	52227	1				382	3179	TRUE	3220	4012	6116	6116
A0A2H1WP10;A0A9R0F0K4;A0A9R0EZG5;A0A9R0EYD8;A0A9R0DXB2;A0A9R0EZ74;A0A9R0DXZ9;A0A9R0DX49;A0A9R0EXL2;A0A9R0DXW3;A0A9R0DXC2;A0A9R0DWB6;A0A9R0DXB0;A0A9R0DX07;A0A9R0DXF1;A0A9R0DWQ2;A0A9R0DWP1;A0A9R0EZH3;A0A9R0DWN1	A0A2H1WP10;A0A9R0F0K4;A0A9R0EZG5;A0A9R0EYD8;A0A9R0DXB2;A0A9R0EZ74;A0A9R0DXZ9;A0A9R0DX49;A0A9R0EXL2;A0A9R0DXW3;A0A9R0DXC2;A0A9R0DWB6;A0A9R0DXB0;A0A9R0DX07;A0A9R0DXF1;A0A9R0DWQ2;A0A9R0DWP1;A0A9R0EZH3;A0A9R0DWN1	2;2;2;2;2;2;2;2;2;2;2;2;2;2;2;2;2;2;2	2;2;2;2;2;2;2;2;2;2;2;2;2;2;2;2;2;2;2	2;2;2;2;2;2;2;2;2;2;2;2;2;2;2;2;2;2;2			tr|A0A2H1WP10|A0A2H1WP10_SPOFR SFRICE_008491 OS=Spodoptera frugiperda OX=7108 GN=SFRICE_008491 PE=3 SV=1;tr|A0A9R0F0K4|A0A9R0F0K4_SPOFR Kinesin-like protein KIF13A isoform X9 OS=Spodoptera frugiperda OX=7108 GN=LOC118282029 PE=3 SV=1;tr|A0A9R0EZG5|A0A9R0EZ	19	2	2	2	2	2	2	1.1	1.1	1.1	205.71	1856	1856;1963;1976;1972;1972;1969;1969;1967;1964;1958;1923;1956;1952;1950;1949;1931;1930;1927;1977	0.0097357	1.2652	1.1	4412200	4412200	49575	49575	2				383	2931;3498	True;True	2968;3544	3710;4440	5677;6779	5677;6779
A0A2H1WP31;A0A9R0EYK7;A0A9R0DZ91;A0A9R0E061	A0A2H1WP31;A0A9R0EYK7;A0A9R0DZ91;A0A9R0E061	1;1;1;1	1;1;1;1	1;1;1;1			tr|A0A2H1WP31|A0A2H1WP31_SPOFR SFRICE_035777 (Fragment) OS=Spodoptera frugiperda OX=7108 GN=SFRICE_035777 PE=4 SV=1;tr|A0A9R0EYK7|A0A9R0EYK7_SPOFR Rho guanine nucleotide exchange factor 12 isoform X3 OS=Spodoptera frugiperda OX=7108 GN=LOC118276831 PE=4 SV	4	1	1	1	1	1	1	6	6	6	22.139	199	199;1547;1730;1740	0.0057389	1.4243	6	0	0	0	0	1				384	4136	TRUE	4203	5303	8039	8039
A0A2H1WP92	A0A2H1WP92	10	1	1			tr|A0A2H1WP92|A0A2H1WP92_SPOFR fumarate hydratase OS=Spodoptera frugiperda OX=7108 GN=SFRICE_031660 PE=3 SV=1	1	10	1	1	10	1	1	56.2	7.8	7.8	38.945	361	361	0	41.249	56.2	57815000	57815000	3400900	3400900	1				385	640;1449;2487;3095;3150;4664;5035;5128;5324;5619	False;False;False;False;False;False;True;False;False;False	648;1470;2521;3134;3191;4739;5117;5211;5407;5707	803;804;1872;3140;3141;3906;3907;3975;3976;6033;6034;6508;6613;6858;7222	1196;1197;1198;1199;2872;4808;4809;4810;4811;5968;5969;5970;6065;6066;6067;9201;9202;9203;9204;9205;9934;10086;10474;11009	1196;2872;4809;5970;6067;9202;9934;10086;10474;11009
A0A2H1WPK0;A0A9R0E7Q1	A0A2H1WPK0;A0A9R0E7Q1	1;1	1;1	1;1			tr|A0A2H1WPK0|A0A2H1WPK0_SPOFR SFRICE_019735 (Fragment) OS=Spodoptera frugiperda OX=7108 GN=SFRICE_019735 PE=3 SV=1;tr|A0A9R0E7Q1|A0A9R0E7Q1_SPOFR LOW QUALITY PROTEIN: myosin heavy chain, non-muscle OS=Spodoptera frugiperda OX=7108 GN=LOC118264677 PE=3 SV=	2	1	1	1	1	1	1	0.9	0.9	0.9	144.75	1262	1262;1973	0.004329	1.4947	0.9	685480	685480	10546	10546	1				387	2290	TRUE	2319	2899	4461	4461
A0A9R0DE74;A0A2H1WQ94	A0A9R0DE74;A0A2H1WQ94	2;2	2;2	2;2			tr|A0A9R0DE74|A0A9R0DE74_SPOFR Tubulin--tyrosine ligase-like protein 12 OS=Spodoptera frugiperda OX=7108 GN=LOC118275886 PE=4 SV=1;tr|A0A2H1WQ94|A0A2H1WQ94_SPOFR SFRICE_009191 OS=Spodoptera frugiperda OX=7108 GN=SFRICE_009191 PE=4 SV=1	2	2	2	2	2	2	2	4.4	4.4	4.4	71.923	615	615;615	0	4.2722	4.4	5998500	5998500	153810	153810	2				388	1846;3759	True;True	1871;3811	2338;4801	3558;7312	3558;7312
A0A9R0EJQ7;A0A9R0D3Y2;A0A2H1WQI2	A0A9R0EJQ7;A0A9R0D3Y2;A0A2H1WQI2	5;5;5	5;5;5	5;5;5			tr|A0A9R0EJQ7|A0A9R0EJQ7_SPOFR S-adenosylmethionine synthase OS=Spodoptera frugiperda OX=7108 GN=LOC118268701 PE=3 SV=1;tr|A0A9R0D3Y2|A0A9R0D3Y2_SPOFR S-adenosylmethionine synthase OS=Spodoptera frugiperda OX=7108 GN=LOC118268701 PE=3 SV=1;tr|A0A2H1WQI2|A0	3	5	5	5	5	5	5	17.6	17.6	17.6	44.637	404	404;404;475	0	10.463	17.6	47199000	47199000	2484100	2484100	7				389	1373;2126;3663;5171;5230	True;True;True;True;True	1394;2153;3712;5254;5313	1777;2685;4681;6664;6748	2729;4064;7157;7158;10154;10298;10299	2729;4064;7158;10154;10299
A0A2H1WQL7	A0A2H1WQL7	6	6	6			tr|A0A2H1WQL7|A0A2H1WQL7_SPOFR Calumenin-B OS=Spodoptera frugiperda OX=7108 GN=LOC118263435 PE=4 SV=1	1	6	6	6	6	6	6	30.4	30.4	30.4	37.862	322	322	0	28.941	30.4	124050000	124050000	6528900	6528900	7				390	978;3483;4233;5154;5681;5848	True;True;True;True;True;True	994;3529;4302;5237;5770;5941	1247;4422;5433;6644;7304;7503	1871;6753;6754;8220;10128;11148;11427;11428	1871;6753;8220;10128;11148;11428
A0A2H1WRA0;A0A9R0ETE9	A0A2H1WRA0;A0A9R0ETE9	2;2	2;2	2;2			tr|A0A2H1WRA0|A0A2H1WRA0_SPOFR SFRICE_013062 OS=Spodoptera frugiperda OX=7108 GN=LOC118281842 PE=3 SV=1;tr|A0A9R0ETE9|A0A9R0ETE9_SPOFR Spermine synthase isoform X1 OS=Spodoptera frugiperda OX=7108 GN=LOC118281842 PE=3 SV=1	2	2	2	2	2	2	2	6.2	6.2	6.2	42.211	372	372;373	0.0014815	1.6787	6.2	21211000	21211000	1060500	1060500	2				391	1403;4640	True;True	1424;4715	1818;6007	2792;9165	2792;9165
A0A9R0EC25;A0A2H1WRC1;A0A9R0EDD0	A0A9R0EC25;A0A2H1WRC1;A0A9R0EDD0	6;6;6	6;6;6	6;6;6			tr|A0A9R0EC25|A0A9R0EC25_SPOFR Kinesin-like protein KIF20B isoform X2 OS=Spodoptera frugiperda OX=7108 GN=LOC118276358 PE=3 SV=1;tr|A0A2H1WRC1|A0A2H1WRC1_SPOFR SFRICE_002465 OS=Spodoptera frugiperda OX=7108 GN=SFRICE_002465 PE=3 SV=1;tr|A0A9R0EDD0|A0A9R0ED	3	6	6	6	6	6	6	5	5	5	161.31	1421	1421;1445;1448	0	14.509	5	82364000	82364000	1016800	1016800	6				392	234;1224;2172;3138;3257;5266	True;True;True;True;True;True	238;1243;2199;3178;3299;5349	309;1584;2744;3961;4106;6793	457;2402;4199;6047;6249;10384	457;2402;4199;6047;6249;10384
A0A9R0DHN7;A0A2H1WRJ9	A0A9R0DHN7;A0A2H1WRJ9	2;2	2;2	2;2			tr|A0A9R0DHN7|A0A9R0DHN7_SPOFR Dihydrolipoyllysine-residue succinyltransferase component of 2-oxoglutarate dehydrogenase complex, mitochondrial OS=Spodoptera frugiperda OX=7108 GN=LOC118278521 PE=3 SV=1;tr|A0A2H1WRJ9|A0A2H1WRJ9_SPOFR Dihydrolipoyllysine-re	2	2	2	2	2	2	2	3.8	3.8	3.8	50.217	469	469;469	0	5.9589	3.8	6807300	6807300	324160	324160	6				393	2063;2146	True;True	2090;2173	2595;2596;2712	3932;3933;3934;4137;4138;4139	3933;4138
A0A2H1WRK1	A0A2H1WRK1	17	17	17			tr|A0A2H1WRK1|A0A2H1WRK1_SPOFR Cleavage and polyadenylation specificity factor subunit 5 OS=Spodoptera frugiperda OX=7108 GN=LOC118281210 PE=3 SV=1	1	17	17	17	17	17	17	70.5	70.5	70.5	25.846	227	227	0	311.88	70.5	21146000000	21146000000	1762200000	1762200000	66				394	74;289;3053;3303;3385;3386;3561;4108;4148;4160;4226;4227;4228;4455;4457;5059;5060	True;True;True;True;True;True;True;True;True;True;True;True;True;True;True;True;True	76;293;3092;3345;3428;3429;3609;4174;4175;4215;4216;4228;4295;4296;4297;4527;4529;5141;5142	90;372;3854;3855;4173;4174;4310;4311;4312;4514;5263;5264;5265;5266;5267;5318;5319;5320;5339;5340;5421;5422;5423;5424;5425;5426;5427;5751;5752;5755;6536;6537;6538	121;122;542;5880;5881;5882;5883;5884;5885;6351;6352;6353;6354;6591;6592;6593;6594;6595;6876;6877;7988;7989;7990;7991;7992;7993;7994;7995;7996;7997;7998;7999;8061;8062;8063;8085;8086;8087;8088;8199;8200;8201;8202;8203;8204;8205;8206;8207;8208;8209;8210;8211;8212;8698;8699;8706;9977;9978;9979;9980;9981;9982;9983;9984;9985;9986	122;542;5880;6352;6591;6595;6877;7997;8063;8087;8199;8202;8205;8698;8706;9982;9985	40;41	19;31
A0A2H1WRQ3	A0A2H1WRQ3	1	1	1			tr|A0A2H1WRQ3|A0A2H1WRQ3_SPOFR SFRICE_037384 OS=Spodoptera frugiperda OX=7108 GN=SFRICE_037384 PE=4 SV=1	1	1	1	1	1	1	1	3.4	3.4	3.4	28.81	261	261	0.0096022	1.2109	3.4	7577300	7577300	445720	445720	1				395	593	TRUE	601	740	1099	1099
A0A2H1WRS1	A0A2H1WRS1	2	2	2			tr|A0A2H1WRS1|A0A2H1WRS1_SPOFR SFRICE_004647 OS=Spodoptera frugiperda OX=7108 GN=LOC118263282 PE=4 SV=1	1	2	2	2	2	2	2	15	15	15	29.162	274	274	0	17.295	15	13085000	13085000	1090400	1090400	2				396	2036;4431	True;True	2062;4503	2564;5717	3880;8641	3880;8641
A0A2H1WS32	A0A2H1WS32	3	3	3			tr|A0A2H1WS32|A0A2H1WS32_SPOFR NEDD8-activating enzyme E1 regulatory subunit OS=Spodoptera frugiperda OX=7108 GN=LOC118281876 PE=3 SV=1	1	3	3	3	3	3	3	6.2	6.2	6.2	59.795	535	535	0	2.6425	6.2	8127600	8127600	253990	253990	7				397	739;1769;4669	True;True;True	748;1793;4744	926;2253;6039	1385;1386;1387;1388;1389;3422;9210	1387;3422;9210
A0A2H1WS37	A0A2H1WS37	5	5	5			tr|A0A2H1WS37|A0A2H1WS37_SPOFR F-actin-capping protein subunit alpha OS=Spodoptera frugiperda OX=7108 GN=LOC118265936 PE=3 SV=1	1	5	5	5	5	5	5	26.7	26.7	26.7	32.44	288	288	0	14.466	26.7	75056000	75056000	4691000	4691000	9				398	439;1089;2102;2661;5082	True;True;True;True;True	446;1106;2129;2697;5164	557;1381;2654;3363;6564	816;2090;4020;4021;4022;5141;5142;5143;10018	816;2090;4020;5141;10018
A0A9R0EAD6;A0A2H1WS83	A0A9R0EAD6;A0A2H1WS83	4;4	4;4	4;4			tr|A0A9R0EAD6|A0A9R0EAD6_SPOFR Gem-associated protein 5 OS=Spodoptera frugiperda OX=7108 GN=LOC118263628 PE=4 SV=1;tr|A0A2H1WS83|A0A2H1WS83_SPOFR SFRICE_001170 (Fragment) OS=Spodoptera frugiperda OX=7108 GN=SFRICE_001170 PE=4 SV=1	2	4	4	4	4	4	4	3.1	3.1	3.1	142.66	1277	1277;1462	0	2.6116	3.1	26555000	26555000	390520	390520	3				399	2237;4599;4641;5198	True;True;True;True	2266;4674;4716;5281	2839;5961;6008;6705	4379;9095;9166;10234	4379;9095;9166;10234
A0A2H1WS87	A0A2H1WS87	6	6	6			tr|A0A2H1WS87|A0A2H1WS87_SPOFR Heat shock 70 kDa protein 14 (Fragment) OS=Spodoptera frugiperda OX=7108 GN=SFRICE019243.2 PE=2 SV=1	1	6	6	6	6	6	6	21	21	21	51.603	472	472	0	5.357	21	26901000	26901000	1169600	1169600	7				400	816;2564;2573;2643;3450;3583	True;True;True;True;True;True	826;2599;2608;2679;3495;3632	1013;3236;3250;3343;3344;4380;4592	1521;4953;4974;5115;5116;6687;7032	1521;4953;4974;5115;6687;7032
A0A2H1WSF0	A0A2H1WSF0	14	14	2			tr|A0A2H1WSF0|A0A2H1WSF0_SPOFR Serine protease HTRA2, mitochondrial OS=Spodoptera frugiperda OX=7108 GN=SFRICE_024565 PE=3 SV=1	1	14	14	2	14	14	2	24.6	24.6	7.2	77.417	710	710	0	99.864	24.6	1563100000	1563100000	44659000	44659000	30				401	471;736;961;1122;1708;2227;2292;2565;2883;5224;5611;5685;5728;5902	True;True;True;True;True;True;True;True;True;True;True;True;True;True	478;745;974;1139;1732;2256;2321;2600;2920;5307;5699;5774;5818;5995	596;922;923;1190;1419;1420;2178;2824;2901;3237;3657;6739;7211;7308;7357;7572	867;1381;1382;1772;2157;2158;2159;2160;2161;2162;2163;2164;3306;3307;3308;3309;4347;4348;4463;4954;5604;5605;10281;10997;10998;11155;11221;11534;11535;11536	867;1382;1772;2160;3307;4347;4463;4954;5604;10281;10997;11155;11221;11534
A0A2H1WSH8	A0A2H1WSH8	4	4	4			tr|A0A2H1WSH8|A0A2H1WSH8_SPOFR Mitochondrial import inner membrane translocase subunit OS=Spodoptera frugiperda OX=7108 GN=LOC118263697 PE=3 SV=1	1	4	4	4	4	4	4	46.7	46.7	46.7	10.17	90	90	0	11.887	46.7	210890000	210890000	35148000	35148000	4				402	1421;1678;4555;4983	True;True;True;True	1442;1701;4629;5064	1840;2139;5877;6445	2825;3256;8888;9842	2825;3256;8888;9842
Q962Q9;A0A2H1WSU2	Q962Q9;A0A2H1WSU2	1;1	1;1	1;1			tr|Q962Q9|Q962Q9_SPOFR Small ribosomal subunit protein uS10 OS=Spodoptera frugiperda OX=7108 GN=LOC118277579 PE=2 SV=1;tr|A0A2H1WSU2|A0A2H1WSU2_SPOFR Small ribosomal subunit protein uS10 OS=Spodoptera frugiperda OX=7108 GN=SFRICE_016791 PE=3 SV=1	2	1	1	1	1	1	1	11.4	11.4	11.4	13.732	123	123;276	0.0096419	1.23	11.4	18903000	18903000	3150500	3150500	1				403	794	TRUE	804	989	1486	1486
A0A9R0CUX9;A0A2H1WSU5;A0A9R0CV23;A0A9R0CUX7;A0A9R0CUV6;A0A9R0CUW6;A0A9R0EFH4;A0A9R0DUM4;A0A9R0CV18;A0A9R0EFA9;A0A9R0DTZ5;A0A9R0CV32;A0A9R0EFT1;A0A9R0EF90;A0A9R0CUX0;A0A9R0CUZ7	A0A9R0CUX9;A0A2H1WSU5;A0A9R0CV23;A0A9R0CUX7;A0A9R0CUV6;A0A9R0CUW6;A0A9R0EFH4;A0A9R0DUM4;A0A9R0CV18;A0A9R0EFA9;A0A9R0DTZ5;A0A9R0CV32;A0A9R0EFT1;A0A9R0EF90;A0A9R0CUX0;A0A9R0CUZ7	3;3;3;3;3;3;3;3;3;3;3;3;3;3;3;3	3;3;3;3;3;3;3;3;3;3;3;3;3;3;3;3	3;3;3;3;3;3;3;3;3;3;3;3;3;3;3;3			tr|A0A9R0CUX9|A0A9R0CUX9_SPOFR E3 ubiquitin-protein ligase hyd isoform X13 OS=Spodoptera frugiperda OX=7108 GN=LOC118262707 PE=4 SV=1;tr|A0A2H1WSU5|A0A2H1WSU5_SPOFR SFRICE_000446 OS=Spodoptera frugiperda OX=7108 GN=SFRICE_000446 PE=4 SV=1;tr|A0A9R0CV23|A0A	16	3	3	3	3	3	3	1.4	1.4	1.4	306.77	2863	2863;2866;2869;2871;2871;2872;2874;2874;2875;2876;2877;2877;2878;2879;2879;2880	0	3.7197	1.4	15190000	15190000	125530	125530	3				404	1494;2389;4601	True;True;True	1515;2420;4676	1925;3023;5963	2965;4655;9097	2965;4655;9097
Q962Q7;A0A9R0EFB4;A0A2H1WSW0	Q962Q7;A0A9R0EFB4;A0A2H1WSW0	3;3;3	3;3;3	3;3;3			sp|Q962Q7|RS23_SPOFR Small ribosomal subunit protein uS12 OS=Spodoptera frugiperda OX=7108 GN=RpS23 PE=2 SV=1;tr|A0A9R0EFB4|A0A9R0EFB4_SPOFR Small ribosomal subunit protein uS12 OS=Spodoptera frugiperda OX=7108 GN=LOC118262784 PE=3 SV=1;tr|A0A2H1WSW0|A0A2H	3	3	3	3	3	3	3	29.4	29.4	29.4	16.025	143	143;143;153	0	2.2424	29.4	1253500	1253500	208920	208920	5				405	400;769;5309	True;True;True	407;778;5392	506;507;961;6841	736;737;1444;1445;10449	736;1445;10449
A0A2H1WSX9	A0A2H1WSX9	3	3	3			tr|A0A2H1WSX9|A0A2H1WSX9_SPOFR SFRICE_016790 OS=Spodoptera frugiperda OX=7108 GN=LOC118277087 PE=3 SV=1	1	3	3	3	3	3	3	25.4	25.4	25.4	19.574	169	169	0	16.629	25.4	30124000	30124000	3347100	3347100	3				406	551;1167;4842	True;True;True	559;1185;4920	692;1475;6265	1030;2240;9548	1030;2240;9548
A0A9R0F6J7;A0A2H1WTB1	A0A9R0F6J7;A0A2H1WTB1	3;3	3;3	3;3			tr|A0A9R0F6J7|A0A9R0F6J7_SPOFR Tubulin-specific chaperone D OS=Spodoptera frugiperda OX=7108 GN=LOC118268415 PE=3 SV=1;tr|A0A2H1WTB1|A0A2H1WTB1_SPOFR Tubulin-specific chaperone D OS=Spodoptera frugiperda OX=7108 GN=SFRICE_002860 PE=3 SV=1	2	3	3	3	3	3	3	4.1	4.1	4.1	133.72	1202	1202;1202	0	6.9811	4.1	4246000	4246000	75822	75822	4				407	1652;4011;5376	True;True;True	1675;4073;5460	2108;5154;6935	3206;7829;7830;10607	3206;7829;10607
A0A2H1WTC0;A0A9R0DM84	A0A2H1WTC0;A0A9R0DM84	1;1	1;1	1;1			tr|A0A2H1WTC0|A0A2H1WTC0_SPOFR SFRICE_000976 (Fragment) OS=Spodoptera frugiperda OX=7108 GN=SFRICE_000976 PE=4 SV=1;tr|A0A9R0DM84|A0A9R0DM84_SPOFR Ubiquitin conjugation factor E4 B OS=Spodoptera frugiperda OX=7108 GN=LOC118272028 PE=3 SV=1	2	1	1	1	1	1	1	1.8	1.8	1.8	119.28	1067	1067;1232	0	4.0752	1.8	10718000	10718000	194870	194870	2				408	2365	TRUE	2396	2993	4605;4606	4605
A0A2H1WTD6;A0A9R0D7L2;X4ZFY7	A0A2H1WTD6;A0A9R0D7L2;X4ZFY7	6;6;4	6;6;4	6;6;4			tr|A0A2H1WTD6|A0A2H1WTD6_SPOFR Arp2/3 complex 34 kDa subunit OS=Spodoptera frugiperda OX=7108 GN=SFRICE_000980 PE=3 SV=1;tr|A0A9R0D7L2|A0A9R0D7L2_SPOFR Arp2/3 complex 34 kDa subunit OS=Spodoptera frugiperda OX=7108 GN=LOC118271660 PE=3 SV=1;tr|X4ZFY7|X4ZFY	3	6	6	6	6	6	6	20.7	20.7	20.7	38.277	333	333;303;303	0	7.0218	20.7	133610000	133610000	7422800	7422800	8				409	885;2380;3732;5275;5391;5410	True;True;True;True;True;True	895;2411;3782;5358;5476;5496	1103;3013;4762;6803;6953;6974	1645;4642;7256;7257;10398;10630;10654;10655	1645;4642;7256;10398;10630;10654
A0A2H1WTK7	A0A2H1WTK7	1	1	1			tr|A0A2H1WTK7|A0A2H1WTK7_SPOFR Large ribosomal subunit protein uL22 OS=Spodoptera frugiperda OX=7108 GN=LOC118274213 PE=3 SV=1	1	1	1	1	1	1	1	5.3	5.3	5.3	21.515	187	187	0.002907	1.5347	5.3	24296000	24296000	2699600	2699600	1				410	3580	TRUE	3629	4589	7029	7029
A0A9R0DB56;A0A2H1WTL6	A0A9R0DB56;A0A2H1WTL6	6;6	6;6	6;6			tr|A0A9R0DB56|A0A9R0DB56_SPOFR DNA topoisomerase I OS=Spodoptera frugiperda OX=7108 GN=LOC118273729 PE=3 SV=1;tr|A0A2H1WTL6|A0A2H1WTL6_SPOFR DNA topoisomerase I OS=Spodoptera frugiperda OX=7108 GN=LOC118273729 PE=3 SV=1	2	6	6	6	6	6	6	9.9	9.9	9.9	69.964	597	597;929	0	7.7841	9.9	84013000	84013000	2625400	2625400	6				411	540;544;2587;2781;3365;3748	True;True;True;True;True;True	547;551;2622;2818;3408;3799	679;683;3269;3510;4289;4786	1014;1018;5012;5383;5384;6562;7289	1014;1018;5012;5383;6562;7289
A0A9R0EPK3;A0A2H1WTM9	A0A9R0EPK3;A0A2H1WTM9	4;4	4;4	4;4			tr|A0A9R0EPK3|A0A9R0EPK3_SPOFR Sorbitol dehydrogenase OS=Spodoptera frugiperda OX=7108 GN=LOC118274164 PE=3 SV=1;tr|A0A2H1WTM9|A0A2H1WTM9_SPOFR Sorbitol dehydrogenase OS=Spodoptera frugiperda OX=7108 GN=SFRICE_008857 PE=3 SV=1	2	4	4	4	4	4	4	13.6	13.6	13.6	38.746	360	360;360	0	5.9097	13.6	52524000	52524000	2918000	2918000	6				412	849;2048;3075;5290	True;True;True;True	859;2074;3114;5373	1056;2579;3882;6820	1580;3910;3911;3912;5922;5923;10419	1580;3912;5922;10419
A0A2H1WTQ8;Q95V36	A0A2H1WTQ8;Q95V36	15;14	15;14	15;14			tr|A0A2H1WTQ8|A0A2H1WTQ8_SPOFR 40S ribosomal protein S3 OS=Spodoptera frugiperda OX=7108 GN=LOC118271228 PE=3 SV=1;tr|Q95V36|Q95V36_SPOFR 40S ribosomal protein S3 OS=Spodoptera frugiperda OX=7108 PE=2 SV=1	2	15	15	15	15	15	15	70	70	70	26.745	243	243;243	0	38.226	70	802210000	802210000	42222000	42222000	18				413	86;134;1166;1222;1511;1568;1634;1706;1843;2482;2820;2821;4572;4684;5172	True;True;True;True;True;True;True;True;True;True;True;True;True;True;True	88;137;1184;1241;1532;1589;1656;1730;1868;2515;2857;2858;4647;4759;5255	104;173;1474;1581;1945;2015;2089;2176;2335;3134;3567;3568;5908;6060;6665	142;242;2239;2398;2993;3080;3180;3181;3302;3303;3304;3555;4800;5463;5464;8952;9245;10155	142;242;2239;2398;2993;3080;3181;3303;3555;4800;5463;5464;8952;9245;10155
A0A9R0ENZ5;A0A2H1WTR0	A0A9R0ENZ5;A0A2H1WTR0	3;3	3;3	3;3			tr|A0A9R0ENZ5|A0A9R0ENZ5_SPOFR Sorbitol dehydrogenase OS=Spodoptera frugiperda OX=7108 GN=LOC118274356 PE=3 SV=1;tr|A0A2H1WTR0|A0A2H1WTR0_SPOFR Sorbitol dehydrogenase OS=Spodoptera frugiperda OX=7108 GN=SFRICE_008856 PE=3 SV=1	2	3	3	3	3	3	3	11	11	11	37.536	353	353;356	0	8.4694	11	5136900	5136900	270360	270360	6				414	105;367;5955	True;True;True	108;374;6051	138;467;7638	197;198;199;683;684;11625	199;684;11625
A0A2H1WU97;A0A9R0EJZ2;A0A9R0D430	A0A2H1WU97;A0A9R0EJZ2;A0A9R0D430	8;7;7	8;7;7	8;7;7			tr|A0A2H1WU97|A0A2H1WU97_SPOFR Proteasome activator complex subunit 3 isoform X2 OS=Spodoptera frugiperda OX=7108 GN=LOC118268860 PE=3 SV=1;tr|A0A9R0EJZ2|A0A9R0EJZ2_SPOFR Proteasome activator complex subunit 3 isoform X3 OS=Spodoptera frugiperda OX=7108 GN	3	8	8	8	8	8	8	37.4	37.4	37.4	28.13	246	246;242;253	0	61.183	37.4	913340000	913340000	76111000	76111000	16				415	128;815;2861;3347;5353;5836;5967;5968	True;True;True;True;True;True;True;True	131;825;2898;3390;5436;5927;6063;6064	164;1012;3626;3627;3628;4270;6889;6890;6891;7487;7488;7650;7651	230;231;1518;1519;1520;5563;5564;5565;6538;10519;10520;10521;11407;11408;11409;11642;11643	230;1520;5565;6538;10519;11408;11642;11643
A0A2H1WUC9	A0A2H1WUC9	9	1	1			tr|A0A2H1WUC9|A0A2H1WUC9_SPOFR SFRICE_028013 (Fragment) OS=Spodoptera frugiperda OX=7108 GN=SFRICE_028013 PE=4 SV=1	1	9	1	1	9	1	1	47.6	6.7	6.7	27.821	252	252	0	9.7736	47.6	9038000	9038000	695230	695230	1				416	1141;1144;1873;2264;2594;2957;5409;5571;5767	False;False;False;False;False;True;False;False;False	1158;1161;1898;2293;2629;2995;5495;5658;5857	1444;1448;2367;2870;3276;3740;6973;7165;7166;7405;7406	2193;2197;2198;3600;4428;5020;5021;5712;10653;10939;10940;11282;11283	2193;2198;3600;4428;5020;5712;10653;10939;11282
A0A2H1WUD2	A0A2H1WUD2	3	3	3			tr|A0A2H1WUD2|A0A2H1WUD2_SPOFR SFRICE_007556 OS=Spodoptera frugiperda OX=7108 GN=LOC118277035 PE=3 SV=1	1	3	3	3	3	3	3	8.2	8.2	8.2	49.944	437	437	0	4.6188	8.2	51419000	51419000	2142500	2142500	2				417	243;1893;5388	True;True;True	247;1918;5473	319;2389;6950	469;3631;10625	469;3631;10625
A0A2H1WUI0;A0A9R0F6S7;A0A9R0D622;A0A9R0D5Z1;A0A9R0D685	A0A2H1WUI0;A0A9R0F6S7;A0A9R0D622;A0A9R0D5Z1;A0A9R0D685	7;7;7;7;7	7;7;7;7;7	7;7;7;7;7			tr|A0A2H1WUI0|A0A2H1WUI0_SPOFR SFRICE_009614 (Fragment) OS=Spodoptera frugiperda OX=7108 GN=SFRICE_009614 PE=4 SV=1;tr|A0A9R0F6S7|A0A9R0F6S7_SPOFR RNA-binding protein fxr1-A isoform X4 OS=Spodoptera frugiperda OX=7108 GN=LOC118269983 PE=4 SV=1;tr|A0A9R0D62	5	7	7	7	7	7	7	16.8	16.8	16.8	54.238	481	481;538;563;586;587	0	13.65	16.8	165950000	165950000	6146300	6146300	7				418	455;1050;2003;2369;4708;5479;5569	True;True;True;True;True;True;True	462;1067;2029;2400;4783;5566;5656	578;1332;2526;3000;6091;7057;7163	848;2010;3828;4621;9281;10784;10785;10936	848;2010;3828;4621;9281;10785;10936
A0A2H1WUS7	A0A2H1WUS7	5	5	5			tr|A0A2H1WUS7|A0A2H1WUS7_SPOFR Importin subunit alpha OS=Spodoptera frugiperda OX=7108 GN=LOC118268141 PE=3 SV=1	1	5	5	5	5	5	5	15.2	15.2	15.2	56.805	520	520	0	11.894	15.2	40352000	40352000	1834200	1834200	5				419	562;2532;3297;4878;5242	True;True;True;True;True	570;2566;3339;4958;5325	705;3197;4167;6308;6761	1055;4905;6345;9624;10326	1055;4905;6345;9624;10326
A0A2H1WUT9;A0A9R0E5E7;A0A9R0D1I9;A0A9R0F3E2;A0A9R0D1G7;A0A9R0D1C0;A0A9R0E676;A0A9R0D1K1;A0A9R0D1E9;A0A9R0D1N1	A0A2H1WUT9;A0A9R0E5E7;A0A9R0D1I9;A0A9R0F3E2;A0A9R0D1G7;A0A9R0D1C0;A0A9R0E676;A0A9R0D1K1;A0A9R0D1E9;A0A9R0D1N1	3;3;3;3;3;3;3;3;3;3	3;3;3;3;3;3;3;3;3;3	3;3;3;3;3;3;3;3;3;3			tr|A0A2H1WUT9|A0A2H1WUT9_SPOFR SFRICE_019049 OS=Spodoptera frugiperda OX=7108 GN=SFRICE_019049 PE=3 SV=1;tr|A0A9R0E5E7|A0A9R0E5E7_SPOFR Phosphatase and actin regulator 4 isoform X9 OS=Spodoptera frugiperda OX=7108 GN=LOC118267153 PE=3 SV=1;tr|A0A9R0D1I9|A0	10	3	3	3	3	3	3	9.8	9.8	9.8	51.714	460	460;558;569;572;583;583;593;604;606;617	0	4.7491	9.8	19340000	19340000	920970	920970	3				420	2832;3501;3946	True;True;True	2869;3547;4005	3587;4443;5069	5499;6782;7711	5499;6782;7711
A0A2H1WUU5;Q962T4	A0A2H1WUU5;Q962T4	2;1	2;1	2;1			tr|A0A2H1WUU5|A0A2H1WUU5_SPOFR Large ribosomal subunit protein uL24 OS=Spodoptera frugiperda OX=7108 GN=LOC118276169 PE=3 SV=1;tr|Q962T4|Q962T4_SPOFR Large ribosomal subunit protein uL24 OS=Spodoptera frugiperda OX=7108 PE=2 SV=1	2	2	2	2	2	2	2	12.2	12.2	12.2	17.087	148	148;148	0	2.4715	12.2	33236000	33236000	5539400	5539400	2				421	2697;5548	True;True	2733;5635	3404;7140	5206;10904	5206;10904
Q962T5;A0A2H1WUX1	Q962T5;A0A2H1WUX1	4;4	4;4	4;4			sp|Q962T5|RL24_SPOFR Large ribosomal subunit protein eL24 OS=Spodoptera frugiperda OX=7108 GN=RpL24 PE=2 SV=1;tr|A0A2H1WUX1|A0A2H1WUX1_SPOFR Large ribosomal subunit protein eL24 OS=Spodoptera frugiperda OX=7108 GN=LOC118268265 PE=3 SV=1	2	4	4	4	4	4	4	25.2	25.2	25.2	17.405	155	155;155	0	10.273	25.2	110980000	110980000	13872000	13872000	4				422	247;628;2343;5004	True;True;True;True	251;636;2374;5086	324;790;2970;6475	475;1181;4568;9885	475;1181;4568;9885
A0A2H1WUX3	A0A2H1WUX3	40	1	1			tr|A0A2H1WUX3|A0A2H1WUX3_SPOFR SFRICE_013268 (Fragment) OS=Spodoptera frugiperda OX=7108 GN=SFRICE_013268 PE=4 SV=1	1	40	1	1	40	1	1	35.1	2.7	2.7	155.4	1452	1452	0	45.677	35.1	595150000	595150000	8625400	8625400	5				423	47;296;401;511;618;889;932;943;1182;1385;1641;1766;1898;2088;2089;2635;2743;2744;2838;3028;3098;3235;3268;3277;3420;4061;4099;4456;4534;4535;4635;4666;4735;5019;5037;5069;5317;5671;5864;5893	False;False;False;False;False;False;False;False;False;False;False;False;False;False;False;False;False;False;False;False;False;False;False;False;False;False;False;False;True;False;False;False;False;False;False;False;False;False;False;False	49;300;408;518;626;900;944;955;1200;1406;1663;1790;1923;2115;2116;2670;2780;2781;2875;3067;3137;3277;3310;3319;3465;4125;4163;4528;4607;4608;4710;4741;4810;5101;5119;5151;5400;5760;5957;5986	59;379;508;643;776;777;778;1108;1157;1169;1533;1793;1794;1795;2096;2249;2250;2395;2628;2629;3328;3329;3330;3331;3460;3461;3597;3826;3910;3911;4081;4082;4118;4119;4143;4144;4349;5210;5250;5251;5753;5754;5853;5854;6002;6036;6123;6491;6511;6548;6549;6850;6851;7289;7521;7560;7561	81;549;738;739;740;949;1156;1157;1158;1159;1160;1161;1162;1163;1164;1165;1166;1167;1656;1724;1740;2326;2327;2753;2754;2755;2756;2757;2758;3189;3190;3416;3417;3418;3419;3639;3640;3985;3986;5090;5091;5092;5093;5094;5095;5292;5293;5294;5517;5839;5974;5975;5976;5977;5978;5979;5980;6217;6218;6219;6220;6221;6222;6264;6265;6314;6315;6645;7907;7966;7967;7968;8700;8701;8702;8703;8704;8705;8853;8854;8855;8…	81;549;740;949;1166;1656;1724;1740;2326;2754;3189;3418;3639;3985;3986;5091;5292;5294;5517;5839;5977;6220;6264;6315;6645;7907;7966;8702;8856;8858;9155;9207;9322;9912;9941;10000;10461;11112;11452;11517
A0A2H1WV28	A0A2H1WV28	10	1	1			tr|A0A2H1WV28|A0A2H1WV28_SPOFR Nonsense-mediated mRNA decay factor SMG8 OS=Spodoptera frugiperda OX=7108 GN=SFRICE_016123 PE=3 SV=1	1	10	1	1	10	1	1	69.6	8.3	8.3	18.97	181	181	0	10.363	69.6	127880000	127880000	10656000	10656000	2				424	438;1562;2258;2324;2900;3417;3476;4146;4169;5662	False;False;False;False;True;False;False;False;False;False	445;1583;2287;2355;2937;3462;3522;4213;4237;5750	556;2009;2864;2944;2945;2946;2947;3675;4346;4414;5316;5351;5352;7273;7274	814;815;3071;3072;4420;4525;4526;4527;4528;4529;4530;4531;4532;4533;4534;4535;4536;4537;4538;5634;5635;6640;6742;6743;6744;8059;8110;8111;8112;11080;11081;11082	814;3071;4420;4529;5634;6640;6742;8059;8111;11080
A0A9R0EHS7;A0A2H1WV81	A0A9R0EHS7;A0A2H1WV81	6;6	6;6	6;6			tr|A0A9R0EHS7|A0A9R0EHS7_SPOFR Leucine-rich PPR motif-containing protein, mitochondrial OS=Spodoptera frugiperda OX=7108 GN=LOC118265583 PE=4 SV=1;tr|A0A2H1WV81|A0A2H1WV81_SPOFR SFRICE_009650 OS=Spodoptera frugiperda OX=7108 GN=SFRICE_009650 PE=4 SV=1	2	6	6	6	6	6	6	5.4	5.4	5.4	147.93	1311	1311;1311	0	6.7676	5.4	59143000	59143000	712560	712560	7				425	2436;3287;3438;3980;5791;5894	True;True;True;True;True;True	2469;3329;3483;4039;5881;5987	3078;4155;4368;5111;7433;7562	4727;6326;6674;6675;7770;11315;11518	4727;6326;6674;7770;11315;11518
A0A2H1WVB4	A0A2H1WVB4	1	1	1			tr|A0A2H1WVB4|A0A2H1WVB4_SPOFR Enoyl-CoA hydratase, mitochondrial OS=Spodoptera frugiperda OX=7108 GN=LOC118264501 PE=3 SV=1	1	1	1	1	1	1	1	7.1	7.1	7.1	32.718	297	297	0	11.554	7.1	15838000	15838000	931660	931660	1				426	1189	TRUE	1208	1543	2343	2343
A0A9R0DDY9;A0A2H1WVG1	A0A9R0DDY9;A0A2H1WVG1	2;2	2;2	2;2			tr|A0A9R0DDY9|A0A9R0DDY9_SPOFR ATP-dependent Clp protease proteolytic subunit OS=Spodoptera frugiperda OX=7108 GN=LOC118275347 PE=3 SV=1;tr|A0A2H1WVG1|A0A2H1WVG1_SPOFR ATP-dependent Clp protease proteolytic subunit OS=Spodoptera frugiperda OX=7108 GN=SFRIC	2	2	2	2	2	2	2	8.6	8.6	8.6	27.668	255	255;743	0	3.8079	8.6	22120000	22120000	1580000	1580000	3				427	449;2347	True;True	456;2378	570;2974	837;4572;4573	837;4572
A0A2H1WVM0	A0A2H1WVM0	1	1	1			tr|A0A2H1WVM0|A0A2H1WVM0_SPOFR Ran-specific GTPase-activating protein OS=Spodoptera frugiperda OX=7108 GN=LOC118275133 PE=4 SV=1	1	1	1	1	1	1	1	4	4	4	25.82	226	226	0	2.3178	4	49549000	49549000	4504500	4504500	1				428	1412	TRUE	1433	1830	2807	2807
A0A2H1WVR3	A0A2H1WVR3	5	5	5			tr|A0A2H1WVR3|A0A2H1WVR3_SPOFR F-box-like/WD repeat-containing protein TBL1XR1 OS=Spodoptera frugiperda OX=7108 GN=LOC118262406 PE=3 SV=1	1	5	5	5	5	5	5	16.6	16.6	16.6	54.586	507	507	0	19.646	16.6	22862000	22862000	1088700	1088700	5				429	1796;1904;3537;4221;4595	True;True;True;True;True	1820;1929;3585;4290;4670	2281;2401;4487;5416;5957	3469;3647;6841;8194;9091	3469;3647;6841;8194;9091
A0A2H1WVS5;A0A9R0DT53;A0A9R0DUI6;A0A9R0EYW5	A0A2H1WVS5;A0A9R0DT53;A0A9R0DUI6;A0A9R0EYW5	4;4;4;4	4;4;4;4	4;4;4;4			tr|A0A2H1WVS5|A0A2H1WVS5_SPOFR ubiquitinyl hydrolase 1 OS=Spodoptera frugiperda OX=7108 GN=SFRICE_000796 PE=3 SV=1;tr|A0A9R0DT53|A0A9R0DT53_SPOFR ubiquitinyl hydrolase 1 OS=Spodoptera frugiperda OX=7108 GN=LOC118263145 PE=3 SV=1;tr|A0A9R0DUI6|A0A9R0DUI6_SP	4	4	4	4	4	4	4	2.9	2.9	2.9	279.32	2498	2498;2506;2508;2509	0	9.7665	2.9	11117000	11117000	90382	90382	4				430	1565;4738;4742;5979	True;True;True;True	1586;4813;4818;6075	2012;6126;6132;7664	3075;9326;9336;11662	3075;9326;9336;11662
A0A9R0F152;A0A9R0D1Q7;A0A2H1WVV4;A0A8E5NGA3	A0A9R0F152;A0A9R0D1Q7;A0A2H1WVV4	3;3;3;1	3;3;3;1	3;3;3;1			tr|A0A9R0F152|A0A9R0F152_SPOFR Isocitrate dehydrogenase [NADP] OS=Spodoptera frugiperda OX=7108 GN=LOC118267252 PE=3 SV=1;tr|A0A9R0D1Q7|A0A9R0D1Q7_SPOFR Isocitrate dehydrogenase [NADP] OS=Spodoptera frugiperda OX=7108 GN=LOC118267252 PE=3 SV=1;tr|A0A2H1WVV	4	3	3	3	3	3	3	6.6	6.6	6.6	46.083	408	408;434;434;221	0	3.9976	6.6	24021000	24021000	1000900	1000900	6				431	818;2231;5220	True;True;True	828;2260;5303	1015;2830;2831;2832;6731;6732	1523;4355;4356;4357;10272;10273	1523;4356;10272
A0A2H1WVV7;A0A9R0DE60;A0A9R0EPN1	A0A2H1WVV7;A0A9R0DE60;A0A9R0EPN1	1;1;1	1;1;1	1;1;1			tr|A0A2H1WVV7|A0A2H1WVV7_SPOFR SFRICE_011111 OS=Spodoptera frugiperda OX=7108 GN=SFRICE_011111 PE=3 SV=1;tr|A0A9R0DE60|A0A9R0DE60_SPOFR Pre-mRNA-processing factor 39 isoform X2 OS=Spodoptera frugiperda OX=7108 GN=LOC118275482 PE=3 SV=1;tr|A0A9R0EPN1|A0A9R0	3	1	1	1	1	1	1	4.2	4.2	4.2	64.866	570	570;901;971	0	2.8336	4.2	1358300	1358300	52242	52242	1				432	2982	TRUE	3020	3771	5758	5758
A0A2H1WWH2	A0A2H1WWH2	5	5	5			tr|A0A2H1WWH2|A0A2H1WWH2_SPOFR Protein yippee-like OS=Spodoptera frugiperda OX=7108 GN=LOC118263533 PE=3 SV=1	1	5	5	5	5	5	5	47.1	47.1	47.1	13.722	121	121	0	84.27	47.1	875890000	875890000	125130000	125130000	7				433	2326;3062;3127;4576;5755	True;True;True;True;True	2357;3101;3167;4651;5845	2949;3865;3948;3949;5912;7390;7391	4540;5897;6028;6029;8956;11264;11265	4540;5897;6028;8956;11264
A0A2H1WWH7;A0A9R0F617;A0A9R0EDP3;A0A9R0F772;A0A9R0DEJ6;A0A9R0ECE1;A0A9R0DEL9;A0A9R0ECE3	A0A2H1WWH7;A0A9R0F617;A0A9R0EDP3;A0A9R0F772;A0A9R0DEJ6;A0A9R0ECE1;A0A9R0DEL9;A0A9R0ECE3	1;1;1;1;1;1;1;1	1;1;1;1;1;1;1;1	1;1;1;1;1;1;1;1			tr|A0A2H1WWH7|A0A2H1WWH7_SPOFR SFRICE_032678 OS=Spodoptera frugiperda OX=7108 GN=SFRICE_032678 PE=4 SV=1;tr|A0A9R0F617|A0A9R0F617_SPOFR Nucleolar protein dao-5 isoform X7 OS=Spodoptera frugiperda OX=7108 GN=LOC118276143 PE=4 SV=1;tr|A0A9R0EDP3|A0A9R0EDP3_S	8	1	1	1	1	1	1	3.4	3.4	3.4	43.776	417	417;641;643;653;713;715;723;725	0	3.2225	3.4	10271000	10271000	540570	540570	2				434	4619	TRUE	4694	5982	9124;9125	9125
A0A2H1WWK8	A0A2H1WWK8	8	8	8			tr|A0A2H1WWK8|A0A2H1WWK8_SPOFR 116 kDa U5 small nuclear ribonucleoprotein component OS=Spodoptera frugiperda OX=7108 GN=LOC118262309 PE=4 SV=1	1	8	8	8	8	8	8	12.3	12.3	12.3	109.66	976	976	0	45.862	12.3	23503000	23503000	443460	443460	9				435	165;919;1110;1464;1595;2228;2489;6033	True;True;True;True;True;True;True;True	169;930;1127;1485;1616;2257;2523;6129	212;1142;1405;1891;2044;2825;3144;7757	296;1703;2127;2923;3112;4349;4814;11826;11827	296;1703;2127;2923;3112;4349;4814;11826
A0A2H1WWS3	A0A2H1WWS3	6	6	6			tr|A0A2H1WWS3|A0A2H1WWS3_SPOFR DNA replication licensing factor MCM3 OS=Spodoptera frugiperda OX=7108 GN=LOC118269633 PE=3 SV=1	1	6	6	6	6	6	6	11.4	11.4	11.4	90.699	804	804	0	16.131	11.4	74349000	74349000	1548900	1548900	9				436	3616;4897;5153;5990;5996;6018	True;True;True;True;True;True	3665;4977;5236;6086;6092;6114	4627;6331;6332;6643;7706;7713;7740	7076;9664;9665;9666;10127;11753;11760;11799;11800	7076;9666;10127;11753;11760;11799
A0A2H1WWU2	A0A2H1WWU2	1	1	1			tr|A0A2H1WWU2|A0A2H1WWU2_SPOFR SFRICE_005649 (Fragment) OS=Spodoptera frugiperda OX=7108 GN=SFRICE_005649 PE=4 SV=1	1	1	1	1	1	1	1	50	50	50	3.0303	26	26	0	19.364	50	104460000	104460000	104460000	104460000	1				437	508	TRUE	515	639	945	945
O76484;A0A2H1WWX2;A0A9R0DII5	O76484;A0A2H1WWX2;A0A9R0DII5	3;3;3	3;3;3	3;3;3			sp|O76484|CSK2A_SPOFR Casein kinase II subunit alpha OS=Spodoptera frugiperda OX=7108 PE=2 SV=1;tr|A0A2H1WWX2|A0A2H1WWX2_SPOFR Casein kinase II subunit alpha isoform X2 OS=Spodoptera frugiperda OX=7108 GN=LOC118279526 PE=3 SV=1;tr|A0A9R0DII5|A0A9R0DII5_SPO	3	3	3	3	3	3	3	12.5	12.5	12.5	42.024	353	353;353;395	0	3.7775	12.5	59331000	59331000	3122700	3122700	4				438	963;3162;5787	True;True;True	976;3203;5877	1192;3990;7429	1774;1775;6088;11311	1775;6088;11311
A0A2H1WWX8;A0A9R0D9X2	A0A2H1WWX8;A0A9R0D9X2	5;5	5;5	5;5			tr|A0A2H1WWX8|A0A2H1WWX8_SPOFR Mitochondrial import inner membrane translocase subunit OS=Spodoptera frugiperda OX=7108 GN=SFRICE_031205 PE=3 SV=1;tr|A0A9R0D9X2|A0A9R0D9X2_SPOFR Mitochondrial import inner membrane translocase subunit OS=Spodoptera frugiper	2	5	5	5	5	5	5	66.3	66.3	66.3	10.157	89	89;90	0	11.713	66.3	132460000	132460000	22077000	22077000	7				439	646;648;1070;3678;4346	True;True;True;True;True	654;656;1087;3728;4417	810;812;1354;4700;5617	1208;1209;1211;2041;2042;7178;8506	1209;1211;2041;7178;8506
A0A2H1WX17;Q8I866;A0A7S6RMB6	A0A2H1WX17;Q8I866;A0A7S6RMB6	29;29;28	25;25;24	24;24;23			tr|A0A2H1WX17|A0A2H1WX17_SPOFR Endoplasmic reticulum chaperone BiP (Fragment) OS=Spodoptera frugiperda OX=7108 GN=SFRICE016243.2 PE=2 SV=1;tr|Q8I866|Q8I866_SPOFR Heat shock cognate 70 protein OS=Spodoptera frugiperda OX=7108 PE=2 SV=1;tr|A0A7S6RMB6|A0A7S6R	3	29	25	24	29	25	24	48.3	42.3	40.7	73.122	659	659;659;659	0	188.56	48.3	4268800000	4268800000	142290000	142290000	62				440	255;705;950;1077;1336;1399;1439;1456;2305;2321;2397;2647;2835;2863;3549;3641;3683;3739;3891;4041;4072;4693;4797;5070;5364;5517;5582;5701;5809	True;True;True;True;False;True;True;True;True;True;False;True;True;True;True;True;True;False;True;True;True;True;True;True;False;True;True;True;True	259;714;962;1094;1357;1420;1460;1477;2335;2351;2352;2428;2683;2872;2900;3597;3690;3733;3789;3790;3950;4103;4136;4768;4873;5152;5448;5604;5669;5790;5899	333;334;887;1177;1362;1730;1813;1814;1860;1861;1882;2920;2938;2939;2940;3032;3033;3348;3593;3630;4501;4653;4654;4706;4770;4771;4772;5005;5184;5221;6072;6195;6550;6551;6921;7104;7178;7327;7328;7455	485;486;487;1311;1312;1749;1750;1751;1752;2050;2655;2787;2788;2852;2853;2854;2855;2856;2857;2897;4495;4496;4516;4517;4518;4519;4520;4521;4669;4670;5120;5121;5513;5567;5568;6859;6860;6861;7116;7117;7118;7119;7184;7185;7265;7266;7267;7268;7269;7629;7867;7919;7920;7921;7922;7923;7924;7925;9257;9437;10001;10002;10588;10589;10849;10850;10851;10852;10955;11180;11181;11365	485;1311;1751;2050;2655;2788;2853;2897;4496;4519;4670;5120;5513;5568;6859;7117;7184;7266;7629;7867;7922;9257;9437;10001;10588;10849;10955;11181;11365	30;42	150;155
A0A2H1WXA3;A0A1S6Q5K9	A0A2H1WXA3;A0A1S6Q5K9	3;2	3;2	3;2			tr|A0A2H1WXA3|A0A2H1WXA3_SPOFR Proteasome subunit beta OS=Spodoptera frugiperda OX=7108 GN=LOC118273178 PE=3 SV=1;tr|A0A1S6Q5K9|A0A1S6Q5K9_SPOFR proteasome endopeptidase complex (Fragment) OS=Spodoptera frugiperda OX=7108 PE=2 SV=1	2	3	3	3	3	3	3	10.3	10.3	10.3	30.059	281	281;143	0	2.898	10.3	26422000	26422000	1761500	1761500	4				442	4826;5240;5259	True;True;True	4904;5323;5342	6246;6759;6784;6785	9520;10318;10319;10365;10366	9520;10319;10366
A0A2H1WXK1	A0A2H1WXK1	16	16	1			tr|A0A2H1WXK1|A0A2H1WXK1_SPOFR SFRICE_024723 OS=Spodoptera frugiperda OX=7108 GN=SFRICE_024723 PE=3 SV=1	1	16	16	1	16	16	1	39	39	2.1	55.103	484	484	0	139.82	39	2403000000	2403000000	133500000	133500000	18				443	677;681;1162;1563;1811;2028;2190;2486;2691;3226;3793;4054;4340;4749;4957;5814	True;True;True;True;True;True;True;True;True;True;True;True;True;True;True;True	686;690;1180;1584;1835;2054;2218;2520;2727;3268;3848;4118;4411;4825;5037;5904	851;855;1469;2010;2298;2556;2767;2768;3139;3396;4072;4891;5203;5610;6142;6409;6410;7460	1268;1272;1273;2227;3073;3503;3871;4238;4239;4807;5194;6202;7469;7893;8497;9358;9792;9793;11371	1268;1272;2227;3073;3503;3871;4239;4807;5194;6202;7469;7893;8497;9358;9792;11371
A0A2H1WXM1	A0A2H1WXM1	1	1	1			tr|A0A2H1WXM1|A0A2H1WXM1_SPOFR Rab GDP dissociation inhibitor OS=Spodoptera frugiperda OX=7108 GN=LOC118263272 PE=3 SV=1	1	1	1	1	1	1	1	5.6	5.6	5.6	49.885	443	443	0.001506	1.837	5.6	1230700	1230700	49228	49228	1				444	3471	TRUE	3516	4407	6734	6734
A0A9R0F4H9;A0A2H1WXX7	A0A9R0F4H9;A0A2H1WXX7	2;2	2;2	2;2			tr|A0A9R0F4H9|A0A9R0F4H9_SPOFR Titin OS=Spodoptera frugiperda OX=7108 GN=LOC118268606 PE=4 SV=1;tr|A0A2H1WXX7|A0A2H1WXX7_SPOFR SFRICE_009896 OS=Spodoptera frugiperda OX=7108 GN=SFRICE_009896 PE=4 SV=1	2	2	2	2	2	2	2	0.6	0.6	0.6	295.23	2637	2637;2646	0	2.2842	0.6	4472300	4472300	31275	31275	2				445	2199;2213	True;True	2227;2241	2779;2800	4255;4295	4255;4295
A0A2H1WY01;A0A9R0E685	A0A2H1WY01	9;1	9;1	9;1			tr|A0A2H1WY01|A0A2H1WY01_SPOFR Replication protein A subunit OS=Spodoptera frugiperda OX=7108 GN=SFRICE_006183 PE=3 SV=1	2	9	9	9	9	9	9	19.4	19.4	19.4	66.439	602	602;80	0	30.661	19.4	233750000	233750000	6875100	6875100	14				446	1458;3063;3267;3567;4080;4498;4723;5027;5417	True;True;True;True;True;True;True;True;True	1479;3102;3309;3615;4144;4570;4798;5109;5503	1884;3866;3867;4117;4520;5229;5808;6107;6499;6981	2899;5898;5899;5900;5901;5902;6263;6883;7937;7938;8789;9304;9923;10663	2899;5901;6263;6883;7937;8789;9304;9923;10663
Q95V35;A0A2H1WY38	Q95V35;A0A2H1WY38	4;4	4;4	4;4			sp|Q95V35|RS3A_SPOFR Small ribosomal subunit protein eS1 OS=Spodoptera frugiperda OX=7108 PE=2 SV=1;tr|A0A2H1WY38|A0A2H1WY38_SPOFR Small ribosomal subunit protein eS1 OS=Spodoptera frugiperda OX=7108 GN=LOC118280314 PE=3 SV=1	2	4	4	4	4	4	4	15.9	15.9	15.9	29.906	264	264;264	0	11.022	15.9	115020000	115020000	6766100	6766100	4				447	2627;3152;4382;5385	True;True;True;True	2662;3193;4453;5469	3320;3978;5657;6945	5080;6069;6070;8557;10618	5080;6070;8557;10618
A0A2H1WYA9	A0A2H1WYA9	2	1	1			tr|A0A2H1WYA9|A0A2H1WYA9_SPOFR SFRICE_018413 (Fragment) OS=Spodoptera frugiperda OX=7108 GN=SFRICE_018413 PE=4 SV=1	1	2	1	1	2	1	1	25	18.9	18.9	15.537	148	148	0	3.1609	25	33138000	33138000	6627500	6627500	1				448	2138;2381	True;False	2165;2412	2702;2703;3014	4111;4112;4643	4111;4643
A0A9R0DQ38;A0A9R0DQ08;A0A2H1WYC1	A0A9R0DQ38;A0A9R0DQ08;A0A2H1WYC1	1;1;1	1;1;1	1;1;1			tr|A0A9R0DQ38|A0A9R0DQ38_SPOFR DNA replication licensing factor MCM4 OS=Spodoptera frugiperda OX=7108 GN=LOC118266401 PE=3 SV=1;tr|A0A9R0DQ08|A0A9R0DQ08_SPOFR DNA replication licensing factor MCM4 OS=Spodoptera frugiperda OX=7108 GN=LOC118266401 PE=3 SV=1;	3	1	1	1	1	1	1	1.9	1.9	1.9	86.894	782	782;862;862	0.0084151	1.3037	1.9	464730	464730	9112.4	9112.4	1				449	3503	TRUE	3549	4445	6784	6784
A0A2H1WYD2	A0A2H1WYD2	10	10	10			tr|A0A2H1WYD2|A0A2H1WYD2_SPOFR SUMO-activating enzyme subunit 1 OS=Spodoptera frugiperda OX=7108 GN=LOC118265833 PE=3 SV=1	1	10	10	10	10	10	10	38.6	38.6	38.6	38.449	339	339	0	28.645	38.6	236060000	236060000	14754000	14754000	12				450	252;326;1133;1273;1356;1518;4088;4425;4883;4885	True;True;True;True;True;True;True;True;True;True	256;330;1150;1294;1377;1539;4152;4497;4963;4965	329;415;1434;1652;1758;1952;5238;5711;6315;6317	481;605;2182;2522;2701;3000;7951;8635;9636;9637;9639;9640	481;605;2182;2522;2701;3000;7951;8635;9637;9640
A0A2H1WYK3	A0A2H1WYK3	7	1	1			tr|A0A2H1WYK3|A0A2H1WYK3_SPOFR Probable elongation factor 1-delta isoform X1 OS=Spodoptera frugiperda OX=7108 GN=LOC118279562 PE=3 SV=1	1	7	1	1	7	1	1	30.5	3.4	3.4	29.076	266	266	0.0043353	1.4986	30.5	97086000	97086000	5393700	5393700	1				451	791;3601;3995;4124;4747;5371;5654	False;False;False;False;False;False;True	800;3650;4054;4191;4823;5455;5742	985;4611;5130;5283;6139;6140;6928;7264	1480;7052;7795;7796;8016;9354;9355;10598;10599;11070	1480;7052;7795;8016;9355;10599;11070
A0A2H1WYX5;A0A9R0ESP0;A0A9R0DXB5;A0A2H1X0X4;A0A9R0D178;A0A2H1VKX4	A0A2H1WYX5;A0A9R0ESP0	5;5;1;1;1;1	5;5;1;1;1;1	5;5;1;1;1;1			tr|A0A2H1WYX5|A0A2H1WYX5_SPOFR RNA helicase (Fragment) OS=Spodoptera frugiperda OX=7108 GN=SFRICE_035515 PE=4 SV=1;tr|A0A9R0ESP0|A0A9R0ESP0_SPOFR RNA helicase OS=Spodoptera frugiperda OX=7108 GN=LOC118278705 PE=4 SV=1	6	5	5	5	5	5	5	11.2	11.2	11.2	62.531	565	565;736;712;735;1262;1561	0	5.8291	11.2	21676000	21676000	774150	774150	6				452	3091;3105;4748;5080;5944	True;True;True;True;True	3130;3144;4824;5162;6040	3902;3919;6141;6562;7623	5955;5989;9356;9357;10016;11610	5955;5989;9357;10016;11610
A0A2H1WYZ0;G3CKA7;A0A2H1WFF5;A0A9R0EK44;A0A2H1V6C6;A0A9R0CTN2;A0A2H1WZY3	A0A2H1WYZ0;G3CKA7;A0A2H1WFF5;A0A9R0EK44;A0A2H1V6C6	25;24;18;18;18;3;3	25;24;18;18;18;3;3	25;24;18;18;18;3;3			tr|A0A2H1WYZ0|A0A2H1WYZ0_SPOFR Tubulin alpha chain OS=Spodoptera frugiperda OX=7108 GN=LOC118280629 PE=3 SV=1;tr|G3CKA7|G3CKA7_SPOFR Tubulin alpha chain OS=Spodoptera frugiperda OX=7108 PE=2 SV=1;tr|A0A2H1WFF5|A0A2H1WFF5_SPOFR Tubulin alpha chain OS=Spodop	7	25	25	25	25	25	25	80	80	80	49.936	450	450;450;450;450;458;451;452	0	323.31	80	3742000000	3742000000	178190000	178190000	112				453	164;546;561;610;967;1036;1041;1048;1049;1151;1435;1438;2368;2889;2978;3173;3524;3965;4300;4465;4488;5062;5226;5418;5942	True;True;True;True;True;True;True;True;True;True;True;True;True;True;True;True;True;True;True;True;True;True;True;True;True	167;168;553;554;569;618;980;1053;1058;1065;1066;1169;1456;1459;2399;2926;3016;3214;3572;4024;4369;4537;4560;5144;5309;5504;6037;6038	206;207;208;209;210;211;685;686;687;703;704;762;763;764;765;1196;1313;1318;1319;1320;1328;1329;1330;1331;1456;1854;1855;1859;2997;2998;2999;3663;3767;4004;4005;4006;4473;5093;5094;5548;5549;5767;5796;6540;6741;6742;6982;7620;7621	278;279;280;281;282;283;284;285;286;287;288;289;290;291;292;293;294;295;1020;1021;1022;1023;1024;1025;1049;1050;1051;1052;1053;1054;1128;1129;1130;1131;1132;1133;1134;1135;1780;1781;1979;1980;1981;1982;1989;1990;1991;2006;2007;2008;2009;2210;2211;2840;2841;2842;2843;2844;2845;2846;2847;2851;4610;4611;4612;4613;4614;4615;4616;4617;4618;4619;4620;5613;5614;5753;5754;6107;6108;6109;6110;6821;6822;68…	278;1022;1050;1128;1781;1979;1989;2006;2007;2210;2844;2851;4612;5614;5754;6108;6822;7746;8412;8732;8770;9989;10286;10668;11607	44;45;46	313;377;413
A0A2H1WYZ7;A0A2H1VDW1;A0A9R0DPW0	A0A2H1WYZ7	32;3;3	32;3;3	32;3;3			tr|A0A2H1WYZ7|A0A2H1WYZ7_SPOFR Heat shock protein OS=Spodoptera frugiperda OX=7108 GN=Hsp60 PE=2 SV=1	3	32	32	32	32	32	32	71.6	71.6	71.6	60.975	573	573;517;567	0	283.2	71.6	2754600000	2754600000	88858000	88858000	83				454	69;321;420;421;525;651;743;811;900;901;1272;1689;2006;2040;2346;2582;2692;2766;2813;3022;3604;3784;3852;4086;4180;4434;4944;4946;5119;5356;5594;5606	True;True;True;True;True;True;True;True;True;True;True;True;True;True;True;True;True;True;True;True;True;True;True;True;True;True;True;True;True;True;True;True	71;325;427;428;532;659;752;821;911;912;1293;1713;2032;2066;2377;2617;2728;2803;2850;3060;3653;3839;3911;4150;4248;4506;5024;5026;5201;5202;5439;5681;5682;5694	84;85;408;409;535;536;659;660;661;662;815;930;1008;1119;1120;1121;1651;2154;2529;2571;2973;3262;3263;3397;3488;3554;3555;3556;3557;3818;3819;4614;4881;4961;5236;5364;5365;5722;6391;6392;6394;6395;6603;6604;6894;7192;7193;7206	115;116;593;594;595;781;782;783;784;785;786;787;788;789;979;980;981;982;983;1214;1394;1508;1509;1510;1511;1512;1673;1674;1675;2520;2521;3275;3832;3894;3895;4571;4996;4997;4998;4999;5000;5001;5195;5196;5197;5198;5327;5440;5441;5442;5443;5444;5445;5446;5447;5448;5829;5830;7058;7457;7458;7575;7948;8128;8129;8650;9764;9765;9767;9768;10071;10072;10073;10074;10075;10076;10077;10524;10525;10526;10974;10…	115;595;786;789;980;1214;1394;1511;1673;1675;2521;3275;3832;3894;4571;4997;5197;5327;5441;5829;7058;7458;7575;7948;8129;8650;9765;9767;10077;10525;10974;10992	47;48	188;215
A0A2H1WZ88;A0A9R0D1G5;A0A9R0E431	A0A2H1WZ88;A0A9R0D1G5	4;3;1	4;3;1	4;3;1			tr|A0A2H1WZ88|A0A2H1WZ88_SPOFR SFRICE_001073 OS=Spodoptera frugiperda OX=7108 GN=SFRICE_001073 PE=4 SV=1;tr|A0A9R0D1G5|A0A9R0D1G5_SPOFR LOW QUALITY PROTEIN: TRPL translocation defect protein 14-like OS=Spodoptera frugiperda OX=7108 GN=LOC118267071 PE=4 SV=	3	4	4	4	4	4	4	11.4	11.4	11.4	61.795	551	551;520;455	0	3.5098	11.4	23239000	23239000	683510	683510	4				455	2961;3591;4776;5637	True;True;True;True	2999;3640;4852;5725	3745;4600;6173;7241	5725;7041;9405;9406;11036	5725;7041;9405;11036
A0A2H1WZA0	A0A2H1WZA0	1	1	1			tr|A0A2H1WZA0|A0A2H1WZA0_SPOFR Glutamate-rich WD repeat-containing protein 1 OS=Spodoptera frugiperda OX=7108 GN=LOC118272606 PE=4 SV=1	1	1	1	1	1	1	1	2.2	2.2	2.2	49.941	445	445	0.0014663	1.6056	2.2	0	0	0	0	1				456	4090	TRUE	4154	5240	7955	7955
A0A2H1WZB6;A0A2H1WNC3	A0A2H1WZB6	7;1	7;1	7;1			tr|A0A2H1WZB6|A0A2H1WZB6_SPOFR N-terminal amino-acid N(alpha)-acetyltransferase NatA OS=Spodoptera frugiperda OX=7108 GN=LOC118272523 PE=3 SV=1	2	7	7	7	7	7	7	47.8	47.8	47.8	20.604	180	180;81	0	16.557	47.8	49503000	49503000	3808000	3808000	8				457	39;850;1801;2108;2433;3328;4170	True;True;True;True;True;True;True	39;860;1825;2135;2466;3370;4238	47;1057;2286;2661;3075;4208;5353	59;60;1581;3474;4031;4724;6400;8113	60;1581;3474;4031;4724;6400;8113
A0A9R0E4D9;A0A2H1WZC8;A0A9R0E4E5	A0A9R0E4D9;A0A2H1WZC8;A0A9R0E4E5	13;13;13	13;13;13	13;13;13			tr|A0A9R0E4D9|A0A9R0E4D9_SPOFR FACT complex subunit OS=Spodoptera frugiperda OX=7108 GN=LOC118267073 PE=3 SV=1;tr|A0A2H1WZC8|A0A2H1WZC8_SPOFR FACT complex subunit OS=Spodoptera frugiperda OX=7108 GN=SFRICE_001075 PE=3 SV=1;tr|A0A9R0E4E5|A0A9R0E4E5_SPOFR FA	3	13	13	13	13	13	13	15.2	15.2	15.2	128.63	1135	1135;1136;1138	0	52.642	15.2	201500000	201500000	3731400	3731400	14				458	1184;1721;2057;2189;2893;3888;3903;4222;4225;5307;5932;5983;6023	True;True;True;True;True;True;True;True;True;True;True;True;True	1202;1745;2084;2217;2930;3947;3962;4291;4294;5390;6027;6079;6119	1536;2194;2589;2764;2765;2766;3667;5002;5022;5417;5420;6839;7608;7668;7746	2334;3329;3926;4235;4236;4237;5618;7626;7647;8195;8198;10447;11590;11666;11808	2334;3329;3926;4235;5618;7626;7647;8195;8198;10447;11590;11666;11808
A0A2H1WZF0;A0A9R0CX24	A0A2H1WZF0;A0A9R0CX24	4;4	4;4	4;4			tr|A0A2H1WZF0|A0A2H1WZF0_SPOFR Nuclear pore complex protein Nup85 (Fragment) OS=Spodoptera frugiperda OX=7108 GN=SFRICE_032032 PE=3 SV=1;tr|A0A9R0CX24|A0A9R0CX24_SPOFR Nuclear pore complex protein Nup85 OS=Spodoptera frugiperda OX=7108 GN=LOC118263953 PE=3	2	4	4	4	4	4	4	10.7	10.7	10.7	40.926	364	364;651	0	4.7626	10.7	28828000	28828000	1441400	1441400	7				459	2219;2235;2393;4214	True;True;True;True	2247;2264;2424;4283	2811;2837;3027;5409	4323;4324;4325;4376;4660;8183;8184	4323;4376;4660;8184
A0A2H1WZS3	A0A2H1WZS3	2	2	2			tr|A0A2H1WZS3|A0A2H1WZS3_SPOFR Replication factor A protein 2 OS=Spodoptera frugiperda OX=7108 GN=LOC118269374 PE=3 SV=1	1	2	2	2	2	2	2	7.9	7.9	7.9	29.791	265	265	0	17.595	7.9	7811400	7811400	650950	650950	3				460	501;2621	True;True	508;2656	630;3314	933;934;5073	934;5073
A0A2H1X096	A0A2H1X096	1	1	1			tr|A0A2H1X096|A0A2H1X096_SPOFR Probable 26S proteasome non-ATPase regulatory subunit 3 OS=Spodoptera frugiperda OX=7108 GN=LOC118273449 PE=3 SV=1	1	1	1	1	1	1	1	2.2	2.2	2.2	56.299	494	494	0.0028944	1.5102	2.2	4825400	4825400	155660	155660	1				461	699	TRUE	708	881	1304	1304
A0A2H1X0S0;A0A7U1CL29	A0A2H1X0S0;A0A7U1CL29	5;3	5;3	5;3			tr|A0A2H1X0S0|A0A2H1X0S0_SPOFR Heat shock protein (Fragment) OS=Spodoptera frugiperda OX=7108 GN=SFRICE041633.2 PE=2 SV=1;tr|A0A7U1CL29|A0A7U1CL29_SPOFR Heat shock protein OS=Spodoptera frugiperda OX=7108 GN=Hsp19.74 PE=2 SV=1	2	5	5	5	5	5	5	41.7	41.7	41.7	19.742	175	175;175	0	44.083	41.7	118870000	118870000	9905800	9905800	9				462	2857;3245;4712;4903;4940	True;True;True;True;True	2894;3287;4787;4983;5020	3621;3622;4092;4093;6096;6339;6387	5549;5550;6234;6235;6236;9286;9287;9673;9760	5550;6235;9286;9673;9760
A0A9R0DKA0;A0A2H1X0W1;A0A2H1W3F8;A0A9R0EEX5;A0A9R0ENI8;A0A9R0DBC2;A0A9R0EN43;A0A9R0ETV9;A0A2H1WWK0;A0A9R0DBK8;A0A9R0DLM5;A0A9R0ESX7;A0A9R0CUE1;A0A9R0D9B2;A0A9R0D8X8;A0A9R0D8W3;A0A2H1W3Z1;A0A9R0D8U5;A0A2H1WYV6;A0A9R0D8U3;A0A2H1WQD8;A0A9R0D9X5	A0A9R0DKA0;A0A2H1X0W1;A0A2H1W3F8;A0A9R0EEX5;A0A9R0ENI8;A0A9R0DBC2;A0A9R0EN43;A0A9R0ETV9;A0A2H1WWK0;A0A9R0DBK8;A0A9R0DLM5;A0A9R0ESX7;A0A9R0CUE1;A0A9R0D9B2;A0A9R0D8X8;A0A9R0D8W3;A0A2H1W3Z1;A0A9R0D8U5;A0A2H1WYV6;A0A9R0D8U3;A0A2H1WQD8;A0A9R0D9X5	2;2;1;1;1;1;1;1;1;1;1;1;1;1;1;1;1;1;1;1;1;1	2;2;1;1;1;1;1;1;1;1;1;1;1;1;1;1;1;1;1;1;1;1	2;2;1;1;1;1;1;1;1;1;1;1;1;1;1;1;1;1;1;1;1;1			tr|A0A9R0DKA0|A0A9R0DKA0_SPOFR RNA helicase OS=Spodoptera frugiperda OX=7108 GN=LOC118281703 PE=3 SV=1;tr|A0A2H1X0W1|A0A2H1X0W1_SPOFR RNA helicase OS=Spodoptera frugiperda OX=7108 GN=SFRICE_034496 PE=3 SV=1;tr|A0A2H1W3F8|A0A2H1W3F8_SPOFR RNA helicase OS=Sp	22	2	2	2	2	2	2	2.8	2.8	2.8	76.279	679	679;679;517;740;830;829;828;827;825;824;823;822;733;543;695;674;668;598;562;556;543;987	0	2.6443	2.8	7556200	7556200	215890	215890	3				463	1169;3749	True;True	1187;3800	1478;1479;4787	2243;2244;7290	2243;7290
A0A2H1X100;A0A9R0ESM3	A0A2H1X100;A0A9R0ESM3	1;1	1;1	1;1			tr|A0A2H1X100|A0A2H1X100_SPOFR Small nuclear ribonucleoprotein Sm D1 (Fragment) OS=Spodoptera frugiperda OX=7108 GN=SFRICE_018643 PE=3 SV=1;tr|A0A9R0ESM3|A0A9R0ESM3_SPOFR Small nuclear ribonucleoprotein Sm D1 OS=Spodoptera frugiperda OX=7108 GN=LOC11827858	2	1	1	1	1	1	1	15.9	15.9	15.9	13.629	126	126;127	0	8.9388	15.9	2978300	2978300	744570	744570	2				464	6031	TRUE	6127	7755	11823;11824	11823
A0A2H1X127	A0A2H1X127	3	3	1			tr|A0A2H1X127|A0A2H1X127_SPOFR SFRICE_038924 (Fragment) OS=Spodoptera frugiperda OX=7108 GN=SFRICE_038924 PE=4 SV=1	1	3	3	1	3	3	1	21	21	6.4	33.626	329	329	0	11.419	21	3910900	3910900	300830	300830	3				465	35;1577;3076	True;True;True	35;1598;3115	42;2024;3883	53;3089;5924	53;3089;5924
A0A2H1X138	A0A2H1X138	9	9	9			tr|A0A2H1X138|A0A2H1X138_SPOFR Eukaryotic translation initiation factor 3 subunit L OS=Spodoptera frugiperda OX=7108 GN=LOC118272766 PE=3 SV=1	1	9	9	9	9	9	9	21.5	21.5	21.5	63.476	543	543	0	42.211	21.5	170520000	170520000	8526000	8526000	10				466	1475;1557;2195;2880;3144;3803;4003;4927;5110	True;True;True;True;True;True;True;True;True	1496;1578;2223;2917;3185;3858;4062;5007;5192	1904;2003;2774;2775;3653;3968;4902;5139;6370;6594	2939;3063;4250;4251;5599;6058;7483;7484;7809;9734;10058	2939;3063;4251;5599;6058;7484;7809;9734;10058
A0A2H1X176	A0A2H1X176	3	3	3			tr|A0A2H1X176|A0A2H1X176_SPOFR T-complex protein 1 subunit alpha OS=Spodoptera frugiperda OX=7108 GN=LOC118269738 PE=3 SV=1	1	3	3	3	3	3	3	6.3	6.3	6.3	59.08	554	554	0	4.0871	6.3	23888000	23888000	770590	770590	3				467	877;4876;4938	True;True;True	887;4956;5018	1090;6305;6385	1628;9618;9757	1628;9618;9757
Q7KF90;A0A9R0E9N2;A0A2H1X1G5	Q7KF90;A0A9R0E9N2;A0A2H1X1G5	2;2;2	2;2;2	2;2;2			sp|Q7KF90|RL31_SPOFR Large ribosomal subunit protein eL31 OS=Spodoptera frugiperda OX=7108 GN=RpL31 PE=2 SV=1;tr|A0A9R0E9N2|A0A9R0E9N2_SPOFR Large ribosomal subunit protein eL31 OS=Spodoptera frugiperda OX=7108 GN=LOC126912588 PE=3 SV=1;tr|A0A2H1X1G5|A0A2H	3	2	2	2	2	2	2	18.5	18.5	18.5	14.299	124	124;124;130	0.0015552	2.0738	18.5	19543000	19543000	2791900	2791900	2				468	3066;4518	True;True	3105;4591	3872;5832	5907;8827	5907;8827
A0A2H1X1Z7	A0A2H1X1Z7	6	6	6			tr|A0A2H1X1Z7|A0A2H1X1Z7_SPOFR Protein BCCIP homolog OS=Spodoptera frugiperda OX=7108 GN=LOC118270656 PE=3 SV=1	1	6	6	6	6	6	6	32	32	32	33.408	297	297	0	49.972	32	196230000	196230000	15095000	15095000	13				469	403;2447;2453;3945;4445;5103	True;True;True;True;True;True	410;2480;2486;4004;4517;5185	510;3089;3099;3100;5068;5738;5739;5740;6586	742;743;4742;4759;4760;7710;8672;8673;8674;10045;10046;10047;10048	742;4742;4760;7710;8672;10047
A0A2H1X2E4;A0A9R0CXX4;E9KGB3	A0A2H1X2E4;A0A9R0CXX4;E9KGB3	3;3;2	3;3;2	3;3;2			tr|A0A2H1X2E4|A0A2H1X2E4_SPOFR 6-phosphogluconate dehydrogenase, decarboxylating OS=Spodoptera frugiperda OX=7108 GN=SFRICE_004427 PE=3 SV=1;tr|A0A9R0CXX4|A0A9R0CXX4_SPOFR 6-phosphogluconate dehydrogenase, decarboxylating OS=Spodoptera frugiperda OX=7108 G	3	3	3	3	3	3	3	7.2	7.2	7.2	52.738	483	483;483;250	0	8.5408	7.2	34812000	34812000	1392500	1392500	3				470	191;2575;4031	True;True;True	195;2610;4093	255;3252;5174	382;4976;7856	382;4976;7856
A0A2H1X2R9	A0A2H1X2R9	41	41	41			tr|A0A2H1X2R9|A0A2H1X2R9_SPOFR E1 ubiquitin-activating enzyme OS=Spodoptera frugiperda OX=7108 GN=LOC118269427 PE=3 SV=1	1	41	41	41	41	41	41	59.7	59.7	59.7	115.57	1040	1040	0	323.31	59.7	3646200000	3646200000	67522000	67522000	87				471	268;357;537;892;1333;1448;1452;1497;1560;1900;2110;2268;2273;2399;2812;2928;3149;3388;3392;3660;3776;3879;3913;3918;3922;3938;4087;4184;4235;4323;4658;4819;4909;5270;5273;5355;5528;5670;5774;5846;5875	True;True;True;True;True;True;True;True;True;True;True;True;True;True;True;True;True;True;True;True;True;True;True;True;True;True;True;True;True;True;True;True;True;True;True;True;True;True;True;True;True	272;363;544;903;1354;1469;1473;1518;1581;1925;2137;2297;2302;2430;2849;2965;3190;3431;3436;3709;3830;3938;3972;3977;3981;3997;4151;4252;4304;4392;4733;4896;4989;5353;5356;5438;5615;5759;5864;5939;5968	347;348;453;454;455;674;1111;1727;1871;1876;1930;1931;2006;2397;2663;2874;2875;2881;3036;3552;3553;3706;3973;3974;4314;4319;4678;4870;4990;5032;5037;5041;5060;5237;5369;5370;5435;5584;5585;6027;6238;6346;6797;6798;6801;6893;7116;7287;7288;7414;7415;7501;7537;7538	505;506;507;665;666;667;668;669;670;671;1006;1007;1008;1659;2650;2651;2870;2871;2881;2882;2883;2884;2885;2886;2887;2973;2974;2975;2976;3067;3642;4033;4034;4035;4432;4433;4440;4676;5438;5439;5673;6063;6064;6598;6599;6604;7151;7152;7441;7612;7658;7666;7670;7700;7701;7949;7950;8134;8135;8223;8465;8466;8467;9193;9503;9690;9691;9692;9693;9694;10390;10391;10392;10395;10523;10865;11108;11109;11110;11111…	506;667;1007;1659;2650;2871;2885;2976;3067;3642;4035;4433;4440;4676;5439;5673;6063;6599;6604;7151;7441;7612;7658;7666;7670;7701;7949;8135;8223;8466;9193;9503;9694;10392;10395;10523;10865;11108;11291;11425;11477
A0A9R0EKR1;A0A2H1X2X4	A0A9R0EKR1;A0A2H1X2X4	13;13	13;13	13;13			tr|A0A9R0EKR1|A0A9R0EKR1_SPOFR phenylalanine--tRNA ligase OS=Spodoptera frugiperda OX=7108 GN=LOC118269749 PE=3 SV=1;tr|A0A2H1X2X4|A0A2H1X2X4_SPOFR phenylalanine--tRNA ligase OS=Spodoptera frugiperda OX=7108 GN=SFRICE_016625 PE=3 SV=1	2	13	13	13	13	13	13	31.1	31.1	31.1	65.225	585	585;585	0	53.233	31.1	311250000	311250000	8412100	8412100	16				472	249;397;921;1246;1334;2296;2816;2956;3042;3664;4082;5116;5379	True;True;True;True;True;True;True;True;True;True;True;True;True	253;404;932;1267;1355;2326;2853;2994;3081;3713;4146;5198;5463	326;502;503;1144;1622;1728;2909;3561;3739;3843;4682;5231;6600;6938	477;732;733;1705;2476;2652;4478;5455;5710;5711;5866;7159;7941;10065;10066;10067;10610	477;732;1705;2476;2652;4478;5455;5711;5866;7159;7941;10066;10610
A0A9R0ESK9;A0A2H1X346	A0A9R0ESK9;A0A2H1X346	8;8	8;8	8;8			tr|A0A9R0ESK9|A0A9R0ESK9_SPOFR Eukaryotic translation initiation factor 3 subunit E OS=Spodoptera frugiperda OX=7108 GN=LOC118278515 PE=3 SV=1;tr|A0A2H1X346|A0A2H1X346_SPOFR Eukaryotic translation initiation factor 3 subunit E OS=Spodoptera frugiperda OX=7	2	8	8	8	8	8	8	20	20	20	52.043	445	445;445	0	60.605	20	118440000	118440000	4935200	4935200	14				473	2021;2311;2933;4435;4564;5096;5139;5916	True;True;True;True;True;True;True;True	2047;2341;2970;4507;4638;5178;5222;6010	2545;2546;2926;3712;5723;5724;5887;6578;6626;6627;7589	3856;3857;3858;4502;5679;8651;8652;8899;10036;10105;10106;10107;10108;11564	3856;4502;5679;8651;8899;10036;10106;11564
A0A2H1X373;A0A9R0CVX8	A0A2H1X373;A0A9R0CVX8	4;4	4;4	4;4			tr|A0A2H1X373|A0A2H1X373_SPOFR Coatomer subunit beta OS=Spodoptera frugiperda OX=7108 GN=SFRICE_003015 PE=4 SV=1;tr|A0A9R0CVX8|A0A9R0CVX8_SPOFR Coatomer subunit beta OS=Spodoptera frugiperda OX=7108 GN=LOC118263235 PE=4 SV=1	2	4	4	4	4	4	4	5.4	5.4	5.4	103.54	948	948;965	0	6.4437	5.4	24234000	24234000	515630	515630	5				474	330;2196;3571;4818	True;True;True;True	334;2224;3619;4895	419;2776;4524;6237	609;4252;6888;6889;9502	609;4252;6888;9502
A0A2H1X3B3;A0A9R0DED8	A0A2H1X3B3;A0A9R0DED8	1;1	1;1	1;1			tr|A0A2H1X3B3|A0A2H1X3B3_SPOFR SFRICE_038330 (Fragment) OS=Spodoptera frugiperda OX=7108 GN=SFRICE_038330 PE=4 SV=1;tr|A0A9R0DED8|A0A9R0DED8_SPOFR DnaJ homolog subfamily C member 21 OS=Spodoptera frugiperda OX=7108 GN=LOC118276065 PE=4 SV=1	2	1	1	1	1	1	1	11.6	11.6	11.6	16.895	146	146;614	0.0015456	2.0008	11.6	0	0	0	0	1				475	3155	TRUE	3196	3981	6073	6073
A0A2H1X3M7	A0A2H1X3M7	1	1	1			tr|A0A2H1X3M7|A0A2H1X3M7_SPOFR NHP2-like protein 1 OS=Spodoptera frugiperda OX=7108 GN=LOC118272476 PE=3 SV=1	1	1	1	1	1	1	1	9.2	9.2	9.2	14.186	130	130	0	2.6981	9.2	44854000	44854000	5606800	5606800	1				476	2454	TRUE	2487	3101	4761	4761
A0A9R0CZQ3;A0A2H1X3N4;A0A9R0CZP4	A0A9R0CZQ3;A0A2H1X3N4;A0A9R0CZP4	7;7;5	7;7;5	7;7;5			tr|A0A9R0CZQ3|A0A9R0CZQ3_SPOFR Microtubule-associated protein RP/EB family member 1 isoform X2 OS=Spodoptera frugiperda OX=7108 GN=LOC118265971 PE=3 SV=1;tr|A0A2H1X3N4|A0A2H1X3N4_SPOFR SFRICE_031227 OS=Spodoptera frugiperda OX=7108 GN=SFRICE_031227 PE=3 SV	3	7	7	7	7	7	7	37.1	37.1	37.1	30.879	275	275;375;278	0	62.512	37.1	455840000	455840000	32560000	32560000	9				477	534;1107;1463;1591;2430;4787;5135	True;True;True;True;True;True;True	541;1124;1484;1612;2463;4863;5218	671;1402;1890;2040;3072;6185;6621;6622	1002;2124;2922;3108;4719;9425;10098;10099;10100	1002;2124;2922;3108;4719;9425;10100
A0A2H1X3U2;A0A9R0DC83;A0A9R0DC77;A0A9R0DCC7;A0A9R0DC50	A0A2H1X3U2;A0A9R0DC83;A0A9R0DC77;A0A9R0DCC7;A0A9R0DC50	1;1;1;1;1	1;1;1;1;1	1;1;1;1;1			tr|A0A2H1X3U2|A0A2H1X3U2_SPOFR non-specific serine/threonine protein kinase (Fragment) OS=Spodoptera frugiperda OX=7108 GN=SFRICE_029029 PE=3 SV=1;tr|A0A9R0DC83|A0A9R0DC83_SPOFR non-specific serine/threonine protein kinase OS=Spodoptera frugiperda OX=7108	5	1	1	1	1	1	1	3.6	3.6	3.6	38.296	338	338;512;513;515;516	0.0014749	1.6363	3.6	13325000	13325000	888310	888310	1				478	2648	TRUE	2684	3349	5122	5122
A0A2H1X4L7;A0A9R0EMV2;A0A9R0DML8;A0A9R0D9T1;A0A9R0D9T3;A0A9R0D9V1	A0A2H1X4L7;A0A9R0EMV2;A0A9R0DML8;A0A9R0D9T1;A0A9R0D9T3;A0A9R0D9V1	2;2;2;2;2;2	2;2;2;2;2;2	2;2;2;2;2;2			tr|A0A2H1X4L7|A0A2H1X4L7_SPOFR SFRICE_017328 (Fragment) OS=Spodoptera frugiperda OX=7108 GN=SFRICE_017328 PE=4 SV=1;tr|A0A9R0EMV2|A0A9R0EMV2_SPOFR Zinc finger protein chinmo isoform X5 OS=Spodoptera frugiperda OX=7108 GN=LOC118273024 PE=4 SV=1;tr|A0A9R0DML	6	2	2	2	2	2	2	6.3	6.3	6.3	43.702	397	397;431;439;442;447;450	0.0014771	1.6517	6.3	996000	996000	49800	49800	1				479	3632;4467	True;True	3681;4539	4643;5770	7101;8736	7101;8736
A0A2P1DM58;A0A9R0DED2;A0A2H1VHT6;A0A2H1WFS6;A0A2H1V3H8;A0A2H1VHU5;A0A2H1V3A4	A0A2P1DM58;A0A9R0DED2	18;17;7;6;3;1;1	18;17;7;6;3;1;1	18;17;7;6;3;1;1			tr|A0A2P1DM58|A0A2P1DM58_SPOFR Dicer-2-PA OS=Spodoptera frugiperda OX=7108 PE=2 SV=1;tr|A0A9R0DED2|A0A9R0DED2_SPOFR Endoribonuclease Dicer OS=Spodoptera frugiperda OX=7108 GN=LOC118276055 PE=3 SV=1	7	18	18	18	18	18	18	15.4	15.4	15.4	192.52	1685	1685;1684;791;326;185;134;138	0	45.507	15.4	156210000	156210000	1610400	1610400	20				480	801;941;1201;1405;1529;1585;2071;2401;2542;2700;3047;3518;3826;3873;4882;4955;4992;5526	True;True;True;True;True;True;True;True;True;True;True;True;True;True;True;True;True;True	811;953;1220;1426;1550;1606;2098;2432;2576;2736;3086;3566;3883;3932;4962;5035;5073;5613	996;1167;1557;1820;1966;2034;2607;3038;3208;3407;3848;4467;4929;4984;6314;6407;6455;7114	1494;1495;1738;2363;2795;2796;3017;3101;3952;4678;4921;4922;5210;5873;5874;6813;7517;7604;9635;9790;9852;10863	1494;1738;2363;2795;3017;3101;3952;4678;4921;5210;5874;6813;7517;7604;9635;9790;9852;10863
A0A5Q0TYW6;A0A9R0EES5;A0A2H1V5F5;A0A2H1X375	A0A5Q0TYW6;A0A9R0EES5;A0A2H1V5F5	17;17;11;5	16;16;10;5	16;16;10;5			tr|A0A5Q0TYW6|A0A5Q0TYW6_SPOFR Heat shock protein 90 cognate OS=Spodoptera frugiperda OX=7108 PE=2 SV=1;tr|A0A9R0EES5|A0A9R0EES5_SPOFR Endoplasmin OS=Spodoptera frugiperda OX=7108 GN=LOC118262141 PE=3 SV=1;tr|A0A2H1V5F5|A0A2H1V5F5_SPOFR SFRICE015271.2 (Fra	4	17	16	16	17	16	16	26.6	25.7	25.7	89.201	786	786;787;541;192	0	48.357	26.6	285980000	285980000	7332900	7332900	22				481	313;458;964;1059;1197;2181;2815;2917;3124;3180;3258;3477;3744;3751;4763;4959;5249	False;True;True;True;True;True;True;True;True;True;True;True;True;True;True;True;True	317;465;977;1076;1216;2208;2852;2954;3164;3221;3300;3523;3795;3802;4839;5039;5332	398;582;1193;1341;1553;2753;3559;3560;3693;3945;4013;4107;4415;4416;4779;4789;6158;6412;6770	573;574;852;1776;2022;2358;4212;5452;5453;5454;5657;6025;6117;6250;6745;6746;7277;7292;9381;9382;9383;9384;9795;10346	573;852;1776;2022;2358;4212;5453;5657;6025;6117;6250;6746;7277;7292;9382;9795;10346
A0A5Q0TYW7;A0A2H1W9K6;A0A9E8K2G2;A0A7G9U6I9;A0A0K2CTM7;A0A9R0DYI4	A0A5Q0TYW7;A0A2H1W9K6;A0A9E8K2G2;A0A7G9U6I9	17;16;16;16;6;2	5;4;4;4;0;0	5;4;4;4;0;0			tr|A0A5Q0TYW7|A0A5Q0TYW7_SPOFR Heat shock protein 68-like transcript variant 1 OS=Spodoptera frugiperda OX=7108 PE=2 SV=1;tr|A0A2H1W9K6|A0A2H1W9K6_SPOFR SFRICE015416.2 OS=Spodoptera frugiperda OX=7108 GN=SFRICE015416.2 PE=3 SV=1;tr|A0A9E8K2G2|A0A9E8K2G2_SP	6	17	5	5	17	5	5	36	11.3	11.3	69.888	631	631;629;631;631;178;120	0	13.451	36	35576000	35576000	1111700	1111700	6				482	473;510;704;724;1420;1439;1455;1977;2398;2534;2549;3594;3758;4038;4043;4311;5205	False;False;False;False;False;False;False;False;False;False;True;True;True;True;False;True;False	480;517;713;733;1441;1460;1476;2003;2429;2568;2583;3643;3810;4100;4105;4380;5288	598;599;641;642;886;906;907;1839;1860;1861;1881;2499;3034;3035;3199;3200;3216;4604;4800;5181;5186;5565;6713	872;873;874;875;947;948;1310;1347;1348;1349;1350;1351;1352;1353;1354;2823;2824;2852;2853;2854;2855;2856;2857;2893;2894;2895;2896;3792;4671;4672;4673;4674;4675;4907;4908;4930;7045;7310;7311;7864;7870;8436;10248;10249	872;948;1310;1350;2824;2853;2894;3792;4671;4907;4930;7045;7311;7864;7870;8436;10248
A0A9E8JZS5;A0A5Q0TYW8;A0A7G9U6I6;A0A7G9U6I7;A0A9R0DJI3;A0A9R0EXV7;A0A9R0DJD5;A0A9R0DXQ9;A0A9R0EZI3;A0A7G9U6I8;A0A9R0DYK0;A0A9R0DXR9;A0A2H1X3S3;A0A9R0DZ95;A0A9E8G6Q0;A0A2H1V8A4	A0A9E8JZS5;A0A5Q0TYW8;A0A7G9U6I6;A0A7G9U6I7;A0A9R0DJI3;A0A9R0EXV7;A0A9R0DJD5;A0A9R0DXQ9;A0A9R0EZI3;A0A7G9U6I8;A0A9R0DYK0;A0A9R0DXR9;A0A2H1X3S3	21;21;21;21;21;21;21;21;21;21;21;21;18;6;4;4	18;18;18;18;18;18;18;18;18;18;18;18;16;6;3;3	10;10;10;10;10;10;10;10;10;10;10;10;10;2;1;1			tr|A0A9E8JZS5|A0A9E8JZS5_SPOFR Heat shock protein 70-1 OS=Spodoptera frugiperda OX=7108 PE=2 SV=1;tr|A0A5Q0TYW8|A0A5Q0TYW8_SPOFR Heat shock protein 70 OS=Spodoptera frugiperda OX=7108 PE=2 SV=1;tr|A0A7G9U6I6|A0A7G9U6I6_SPOFR Heat shock protein OS=Spodopter	16	21	18	10	21	18	10	41.4	37.5	18.7	70.094	638	638;643;651;663;667;678;678;686;698;702;717;981;470;127;627;627	0	124.36	41.4	2054500000	2054500000	66274000	66274000	39				483	473;510;704;724;881;1420;1455;1977;2398;2534;2791;3355;3504;3596;3597;4039;4043;4196;4799;5205;5663	False;True;True;True;True;True;False;True;True;True;True;True;True;True;True;True;True;True;True;False;True	480;517;713;733;891;1441;1476;2003;2429;2568;2828;3398;3550;3645;3646;4101;4105;4265;4875;5288;5751	598;599;641;642;886;906;907;1095;1096;1097;1098;1839;1881;2499;3034;3035;3199;3200;3521;4279;4446;4606;4607;5182;5186;5390;6199;6200;6713;7275	872;873;874;875;947;948;1310;1347;1348;1349;1350;1351;1352;1353;1354;1637;1638;1639;1640;2823;2824;2893;2894;2895;2896;3792;4671;4672;4673;4674;4675;4907;4908;5398;5399;5400;6550;6785;7047;7048;7865;7870;8161;9445;9446;9447;9448;10248;10249;11083;11084	872;948;1310;1350;1640;2824;2894;3792;4671;4907;5398;6550;6785;7047;7048;7865;7870;8161;9448;10248;11084
A0A5Q0TYX2;A0A9R0EH03;A0A2H1VIB8	A0A5Q0TYX2;A0A9R0EH03;A0A2H1VIB8	10;10;9	10;10;9	10;10;9			tr|A0A5Q0TYX2|A0A5Q0TYX2_SPOFR Heat shock protein 70 cognate-interacting protein-like protein OS=Spodoptera frugiperda OX=7108 PE=2 SV=1;tr|A0A9R0EH03|A0A9R0EH03_SPOFR Hsc70-interacting protein OS=Spodoptera frugiperda OX=7108 GN=LOC118265008 PE=3 SV=1;tr|	3	10	10	10	10	10	10	35.1	35.1	35.1	44.838	416	416;410;408	0	60.307	35.1	331230000	331230000	22082000	22082000	15				484	159;163;1391;1404;1451;1744;1774;2289;3637;3774	True;True;True;True;True;True;True;True;True;True	162;166;1412;1425;1472;1768;1798;2318;3686;3828	201;205;1802;1819;1874;1875;2220;2258;2898;4648;4649;4867	273;277;2767;2793;2794;2878;2879;2880;3364;3435;4460;7108;7109;7110;7438	273;277;2767;2794;2879;3364;3435;4460;7108;7438
A0A9E8G6J1;A0A5Q0TYX6;A0A2H1VRL9;A0A2H1VW71;A0A2H1VNW0	A0A9E8G6J1;A0A5Q0TYX6;A0A2H1VRL9;A0A2H1VW71	35;35;28;19;4	35;35;28;19;4	35;35;28;19;4			tr|A0A9E8G6J1|A0A9E8G6J1_SPOFR Heat shock protein 70-6 OS=Spodoptera frugiperda OX=7108 PE=2 SV=1;tr|A0A5Q0TYX6|A0A5Q0TYX6_SPOFR Heat shock 70 kDa protein cognate 5 OS=Spodoptera frugiperda OX=7108 GN=LOC118278928 PE=2 SV=1;tr|A0A2H1VRL9|A0A2H1VRL9_SPOFR S	5	35	35	35	35	35	35	49.6	49.6	49.6	74.797	686	686;686;558;381;119	0	323.31	49.6	5578900000	5578900000	143050000	143050000	76				485	16;338;491;706;714;746;898;910;1293;1294;1309;1337;1698;2696;2705;3031;3044;3741;3870;4209;4420;4552;4678;4802;4803;4811;4865;4866;4949;5204;5375;5471;5472;5664;5801	True;True;True;True;True;True;True;True;True;True;True;True;True;True;True;True;True;True;True;True;True;True;True;True;True;True;True;True;True;True;True;True;True;True;True	16;342;498;715;723;755;909;921;1314;1315;1330;1358;1722;2732;2741;3070;3083;3792;3929;4278;4491;4625;4626;4753;4878;4879;4888;4944;4945;5029;5287;5459;5558;5559;5752;5891	19;428;620;888;896;933;1117;1131;1678;1679;1680;1681;1682;1683;1700;1701;1731;2166;2167;3403;3412;3829;3845;4774;4775;4981;5404;5704;5872;5873;6052;6053;6203;6204;6221;6292;6293;6398;6712;6933;6934;7048;7049;7050;7276;7444	27;622;904;1313;1325;1326;1327;1328;1329;1330;1397;1665;1666;1687;1688;2573;2574;2575;2576;2577;2578;2579;2580;2608;2609;2656;2657;3289;3290;5204;5205;5217;5218;5219;5844;5845;5846;5847;5848;5868;7271;7272;7600;8178;8626;8627;8880;8881;8882;8883;9227;9228;9229;9451;9452;9453;9477;9590;9591;9592;9772;9773;10244;10245;10246;10247;10605;10606;10767;10768;10769;10770;10771;11085;11335;11336;11337;113…	27;622;904;1313;1327;1397;1665;1688;2573;2575;2608;2656;3289;5205;5218;5847;5868;7272;7600;8178;8626;8881;9227;9452;9453;9477;9590;9592;9772;10245;10606;10767;10771;11085;11337	49	396
A0A5Q0TZJ3;A0A9R0DD11;A0A2H1WFE1	A0A5Q0TZJ3;A0A9R0DD11;A0A2H1WFE1	6;6;4	6;6;4	6;6;4			tr|A0A5Q0TZJ3|A0A5Q0TZJ3_SPOFR Heat shock protein HSP70-binding protein 1 OS=Spodoptera frugiperda OX=7108 PE=2 SV=1;tr|A0A9R0DD11|A0A9R0DD11_SPOFR Hsp70-binding protein 1 OS=Spodoptera frugiperda OX=7108 GN=LOC118275040 PE=4 SV=1;tr|A0A2H1WFE1|A0A2H1WFE1_	3	6	6	6	6	6	6	26.1	26.1	26.1	42.72	387	387;379;228	0	35.857	26.1	93772000	93772000	4688600	4688600	10				486	2037;2431;2502;3710;4730;5486	True;True;True;True;True;True	2063;2464;2536;3760;4805;5573	2565;3073;3159;4736;6117;6118;7066	3881;3882;3883;4720;4721;4722;4839;7220;9315;9316;10798	3882;4722;4839;7220;9315;10798
A0A9E7V3T5;A0A2H1VU96	A0A9E7V3T5;A0A2H1VU96	17;16	17;16	17;16			tr|A0A9E7V3T5|A0A9E7V3T5_SPOFR Protein disulfide-isomerase OS=Spodoptera frugiperda OX=7108 GN=LOC118272650 PE=2 SV=1;tr|A0A2H1VU96|A0A2H1VU96_SPOFR Protein disulfide-isomerase OS=Spodoptera frugiperda OX=7108 GN=SFRICE_018487 PE=3 SV=1	2	17	17	17	17	17	17	46.6	46.6	46.6	55.352	494	494;494	0	91.341	46.6	1141400000	1141400000	36820000	36820000	24				487	2432;2613;3666;3905;3924;4186;4254;4685;5006;5022;5117;5118;5256;5335;5485;5595;5909	True;True;True;True;True;True;True;True;True;True;True;True;True;True;True;True;True	2465;2648;3715;3964;3983;4254;4323;4760;5088;5104;5199;5200;5339;5418;5572;5683;6002	3074;3299;4684;5024;5043;5373;5459;6061;6477;6478;6494;6601;6602;6781;6869;7064;7065;7194;7579	4723;5051;7161;7649;7672;8139;8257;9246;9888;9889;9890;9891;9892;9893;9894;9918;10068;10069;10070;10361;10488;10796;10797;10976;11548	4723;5051;7161;7649;7672;8139;8257;9246;9889;9918;10069;10070;10361;10488;10796;10976;11548
A0A9E8JZS1;A0A9R0EXS9;A0A9R0CUV2;A0A9R0EFN3;A0A2H1VCM4	A0A9E8JZS1;A0A9R0EXS9;A0A9R0CUV2;A0A9R0EFN3;A0A2H1VCM4	14;14;13;13;13	14;14;13;13;13	13;13;12;12;12			tr|A0A9E8JZS1|A0A9E8JZS1_SPOFR thioredoxin-dependent peroxiredoxin OS=Spodoptera frugiperda OX=7108 GN=LOC118262554 PE=2 SV=1;tr|A0A9R0EXS9|A0A9R0EXS9_SPOFR thioredoxin-dependent peroxiredoxin OS=Spodoptera frugiperda OX=7108 GN=LOC118262554 PE=3 SV=1;tr|A	5	14	14	13	14	14	13	74.4	74.4	69.2	21.941	195	195;255;261;293;353	0	140.89	74.4	11656000000	11656000000	896580000	896580000	35				488	55;790;983;1850;2105;2332;2763;2826;3603;4158;4245;4281;4891;5194	True;True;True;True;True;True;True;True;True;True;True;True;True;True	57;799;999;1875;2132;2363;2800;2863;3652;4226;4314;4350;4971;5277	67;68;984;1252;1253;2343;2657;2658;2956;2957;3485;3574;3575;4613;5336;5337;5448;5489;6325;6699;6700	94;95;1477;1478;1479;1876;1877;1878;3564;4025;4026;4547;4548;4549;4550;4551;4552;5324;5476;5477;5478;7056;7057;8080;8081;8082;8083;8240;8241;8242;8243;8294;9657;10224;10225;10226;10227	94;1477;1876;3564;4025;4551;5324;5477;7056;8083;8240;8294;9657;10227
A0A9R0CTH2;A0A2H1VNH2	A0A9R0CTH2;A0A2H1VNH2	4;3	4;3	4;3			tr|A0A9R0CTH2|A0A9R0CTH2_SPOFR Ran-binding protein 3 OS=Spodoptera frugiperda OX=7108 GN=LOC118261883 PE=4 SV=1;tr|A0A2H1VNH2|A0A2H1VNH2_SPOFR SFRICE_027305 OS=Spodoptera frugiperda OX=7108 GN=SFRICE_027305 PE=4 SV=1	2	4	4	4	4	4	4	14.4	14.4	14.4	47.874	445	445;316	0	6.8978	14.4	32522000	32522000	1414000	1414000	4				489	2591;3038;3049;5141	True;True;True;True	2626;3077;3088;5224	3273;3838;3850;6629	5017;5860;5876;10110	5017;5860;5876;10110
A0A9R0CU18;A0A2H1VLJ1	A0A9R0CU18;A0A2H1VLJ1	5;4	5;4	5;4			tr|A0A9R0CU18|A0A9R0CU18_SPOFR Mitochondrial-processing peptidase subunit alpha OS=Spodoptera frugiperda OX=7108 GN=LOC118262297 PE=4 SV=1;tr|A0A2H1VLJ1|A0A2H1VLJ1_SPOFR Mitochondrial-processing peptidase subunit alpha OS=Spodoptera frugiperda OX=7108 GN=S	2	5	5	5	5	5	5	9.1	9.1	9.1	59.429	536	536;518	0	4.4528	9.1	34660000	34660000	1195200	1195200	5				490	799;1170;3486;3643;4448	True;True;True;True;True	809;1188;3532;3692;4520	994;1480;4426;4656;5743	1492;2245;6758;7121;8677	1492;2245;6758;7121;8677
A0A9R0CU51;A0A2H1X0V2	A0A9R0CU51;A0A2H1X0V2	2;1	2;1	2;1			tr|A0A9R0CU51|A0A9R0CU51_SPOFR RNA-binding protein RO60 OS=Spodoptera frugiperda OX=7108 GN=LOC118262329 PE=3 SV=1;tr|A0A2H1X0V2|A0A2H1X0V2_SPOFR SFRICE_023061 (Fragment) OS=Spodoptera frugiperda OX=7108 GN=SFRICE_023061 PE=4 SV=1	2	2	2	2	2	2	2	3.3	3.3	3.3	72.184	635	635;361	0.0015267	1.8909	3.3	15189000	15189000	489960	489960	2				491	1541;5510	True;True	1562;5597	1982;7097	3036;10842	3036;10842
A0A9R0CU55;A0A2H1X0T0;A0A2H1WUY2	A0A9R0CU55;A0A2H1X0T0	9;5;3	9;5;3	9;5;3			tr|A0A9R0CU55|A0A9R0CU55_SPOFR Eukaryotic translation initiation factor 3 subunit I OS=Spodoptera frugiperda OX=7108 GN=LOC118262336 PE=3 SV=1;tr|A0A2H1X0T0|A0A2H1X0T0_SPOFR Serine-threonine kinase receptor-associated protein (Fragment) OS=Spodoptera frugi	3	9	9	9	9	9	9	41	41	41	36.89	329	329;152;176	0	27.278	41	359670000	359670000	22480000	22480000	9				492	368;1091;1126;1797;3039;3743;4922;4982;5216	True;True;True;True;True;True;True;True;True	375;1108;1143;1821;3078;3794;5002;5063;5299	468;1383;1425;1426;2282;3839;4778;6364;6444;6727	685;2092;2171;2172;3470;5861;7276;9720;9840;9841;10267	685;2092;2172;3470;5861;7276;9720;9840;10267
A0A9R0CUB4;A0A2H1WXD8;A0A2H1WD96	A0A9R0CUB4	21;8;1	21;8;1	21;8;1			tr|A0A9R0CUB4|A0A9R0CUB4_SPOFR UDP-glucose:glycoprotein glucosyltransferase OS=Spodoptera frugiperda OX=7108 GN=LOC118262403 PE=3 SV=1	3	21	21	21	21	21	21	20.6	20.6	20.6	177.28	1570	1570;568;168	0	94.386	20.6	270540000	270540000	3513500	3513500	28				493	1034;1227;1740;1939;2384;2469;2653;2924;3071;3224;3389;3699;4509;4546;4704;4913;5156;5283;5294;5422;5564	True;True;True;True;True;True;True;True;True;True;True;True;True;True;True;True;True;True;True;True;True	1051;1246;1764;1965;2415;2502;2689;2961;3110;3266;3432;3749;4582;4619;4779;4993;5239;5366;5377;5508;5651	1310;1311;1588;2216;2450;3017;3119;3354;3702;3878;4069;4070;4315;4725;5823;5866;6087;6352;6646;6812;6825;6987;7158	1976;1977;2408;3357;3722;4646;4782;5127;5666;5917;6197;6198;6199;6200;6600;7207;7208;8814;8871;8872;9277;9700;10130;10131;10407;10408;10426;10427;10675;10931	1976;2408;3357;3722;4646;4782;5127;5666;5917;6198;6600;7208;8814;8872;9277;9700;10131;10408;10427;10675;10931
A0A9R0CUJ2;A0A2H1WC92	A0A9R0CUJ2	13;4	13;4	13;4			tr|A0A9R0CUJ2|A0A9R0CUJ2_SPOFR Cytosolic non-specific dipeptidase OS=Spodoptera frugiperda OX=7108 GN=LOC118262426 PE=3 SV=1	2	13	13	13	13	13	13	30.4	30.4	30.4	58.977	526	526;356	0	36.71	30.4	446300000	446300000	12751000	12751000	14				494	598;1094;1993;2461;2656;2905;3202;3404;3822;3830;4092;4116;4551	True;True;True;True;True;True;True;True;True;True;True;True;True	606;1111;2019;2494;2692;2942;3244;3449;3878;3887;4156;4183;4624	748;1386;2516;3109;3358;3680;3681;4042;4333;4924;4933;5243;5275;5871	1111;2096;3813;4770;5133;5641;5642;6155;6624;6625;7511;7522;7958;8007;8879	1111;2096;3813;4770;5133;5642;6155;6625;7511;7522;7958;8007;8879
A0A9R0CVK4;A0A2H1VBH5	A0A9R0CVK4;A0A2H1VBH5	27;26	27;26	26;25			tr|A0A9R0CVK4|A0A9R0CVK4_SPOFR Glycine--tRNA ligase OS=Spodoptera frugiperda OX=7108 GN=LOC118263057 PE=3 SV=1;tr|A0A2H1VBH5|A0A2H1VBH5_SPOFR Glycine--tRNA ligase OS=Spodoptera frugiperda OX=7108 GN=SFRICE_000287 PE=3 SV=1	2	27	27	26	27	27	26	48.5	48.5	47.5	82.166	730	730;679	0	260.44	48.5	1627100000	1627100000	38742000	38742000	56				495	129;417;945;1214;1217;1284;1411;1759;1833;2396;2476;2589;2976;3238;3383;3393;3552;4267;4540;4751;4778;4961;5229;5261;5339;5357;5518	True;True;True;True;True;True;True;True;True;True;True;True;True;True;True;True;True;True;True;True;True;True;True;True;True;True;True	132;424;957;1233;1236;1305;1432;1783;1858;2427;2509;2624;3014;3280;3426;3437;3600;4336;4613;4827;4854;5041;5312;5344;5422;5440;5605	165;531;1172;1572;1575;1576;1669;1829;2241;2242;2325;3030;3031;3127;3128;3271;3765;4085;4308;4320;4504;5473;5860;6144;6175;6176;6414;6746;6747;6787;6788;6873;6895;7105	232;776;1743;1744;2386;2387;2388;2391;2392;2559;2806;3399;3400;3401;3402;3403;3539;3540;3541;4667;4668;4792;4793;4794;5014;5750;6225;6588;6605;6606;6607;6865;8276;8865;9360;9409;9410;9411;9797;10295;10296;10297;10373;10374;10375;10376;10377;10492;10493;10494;10495;10496;10497;10498;10527;10853	232;776;1743;2388;2392;2559;2806;3400;3540;4667;4793;5014;5750;6225;6588;6606;6865;8276;8865;9360;9410;9797;10297;10375;10498;10527;10853
A0A9R0DU71;A0A9R0EG52;A0A9R0EFL3;A0A9R0CVM6;A0A9R0CVQ7;A0A9R0CVP8;A0A9R0CVR6;A0A9R0CVM1	A0A9R0DU71;A0A9R0EG52;A0A9R0EFL3;A0A9R0CVM6;A0A9R0CVQ7;A0A9R0CVP8;A0A9R0CVR6;A0A9R0CVM1	1;1;1;1;1;1;1;1	1;1;1;1;1;1;1;1	1;1;1;1;1;1;1;1			tr|A0A9R0DU71|A0A9R0DU71_SPOFR dynamin GTPase OS=Spodoptera frugiperda OX=7108 GN=LOC118263130 PE=3 SV=1;tr|A0A9R0EG52|A0A9R0EG52_SPOFR dynamin GTPase OS=Spodoptera frugiperda OX=7108 GN=LOC118263130 PE=3 SV=1;tr|A0A9R0EFL3|A0A9R0EFL3_SPOFR dynamin GTPase	8	1	1	1	1	1	1	1.7	1.7	1.7	96.211	859	859;874;909;909;914;914;924;924	0	3.325	1.7	1255800	1255800	24624	24624	1				496	373	TRUE	380	474	691	691
A0A9R0CW49;A0A9R0E8B3;A0A9R0E8B8;A0A9R0E9H3;A0A9R0CW60;A0A9R0CW82;A0A9R0CW84;A0A9R0CW68;A0A9R0CW85;A0A9R0EG56;A0A2H1VL10	A0A9R0CW49;A0A9R0E8B3;A0A9R0E8B8;A0A9R0E9H3;A0A9R0CW60;A0A9R0CW82;A0A9R0CW84;A0A9R0CW68;A0A9R0CW85;A0A9R0EG56;A0A2H1VL10	15;15;15;15;15;14;14;14;14;14;8	15;15;15;15;15;14;14;14;14;14;8	15;15;15;15;15;14;14;14;14;14;8			tr|A0A9R0CW49|A0A9R0CW49_SPOFR Dynamin-1-like protein isoform X10 OS=Spodoptera frugiperda OX=7108 GN=LOC118263432 PE=4 SV=1;tr|A0A9R0E8B3|A0A9R0E8B3_SPOFR Dynamin-1-like protein isoform X9 OS=Spodoptera frugiperda OX=7108 GN=LOC118263432 PE=4 SV=1;tr|A0A9	11	15	15	15	15	15	15	29.7	29.7	29.7	75.14	667	667;694;700;719;725;699;726;732;751;757;503	0	38.176	29.7	280180000	280180000	5961200	5961200	16				497	190;993;1285;1810;2630;2657;3094;3429;3935;4473;4648;4810;4844;5562;5754	True;True;True;True;True;True;True;True;True;True;True;True;True;True;True	194;1010;1306;1834;2665;2693;3133;3474;3994;4545;4723;4887;4922;5649;5844	254;1264;1670;2297;3323;3359;3905;4358;5056;5776;5777;6015;6220;6267;7156;7389	381;1893;2560;3502;5083;5134;5967;6656;7694;8743;8744;9174;9476;9552;10929;11262;11263	381;1893;2560;3502;5083;5134;5967;6656;7694;8743;9174;9476;9552;10929;11263
A0A9R0CWF9;A0A9R0CWH6;A0A9R0EGA5;A0A9R0EFY6;A0A2H1X1K0;A0A2H1V5Z6	A0A9R0CWF9;A0A9R0CWH6;A0A9R0EGA5;A0A9R0EFY6;A0A2H1X1K0	4;4;4;4;3;1	4;4;4;4;3;1	4;4;4;4;3;1			tr|A0A9R0CWF9|A0A9R0CWF9_SPOFR Pericentriolar material 1 protein isoform X4 OS=Spodoptera frugiperda OX=7108 GN=LOC118263569 PE=4 SV=1;tr|A0A9R0CWH6|A0A9R0CWH6_SPOFR Pericentriolar material 1 protein isoform X3 OS=Spodoptera frugiperda OX=7108 GN=LOC118263	6	4	4	4	4	4	4	3.3	3.3	3.3	179.78	1609	1609;1780;1791;1813;1309;256	0	8.5408	3.3	85832000	85832000	1560600	1560600	6				498	1218;5222;5509;5715	True;True;True;True	1237;5305;5596;5804	1577;6735;6736;7096;7342	2393;2394;10276;10277;10278;10841;11204	2393;10276;10841;11204
A0A9R0CX77	A0A9R0CX77	1	1	1			tr|A0A9R0CX77|A0A9R0CX77_SPOFR BTB/POZ domain-containing protein KCTD5 OS=Spodoptera frugiperda OX=7108 GN=LOC118263993 PE=4 SV=1	1	1	1	1	1	1	1	9.7	9.7	9.7	25.273	217	217	0.0015625	2.1361	9.7	1209300	1209300	120930	120930	1				499	5556	TRUE	5643	7150	10922	10922
A0A9R0CY64;A0A9R0CY44;A0A9R0CY90;A0A9R0CY41	A0A9R0CY64;A0A9R0CY44;A0A9R0CY90;A0A9R0CY41	31;31;31;31	31;31;31;31	2;2;2;2			tr|A0A9R0CY64|A0A9R0CY64_SPOFR BAG domain-containing protein Samui isoform X4 OS=Spodoptera frugiperda OX=7108 GN=LOC118264804 PE=4 SV=1;tr|A0A9R0CY44|A0A9R0CY44_SPOFR BAG domain-containing protein Samui isoform X3 OS=Spodoptera frugiperda OX=7108 GN=LOC11	4	31	31	2	31	31	2	41.6	41.6	3	71.375	637	637;641;650;650	0	323.31	41.6	10707000000	10707000000	281760000	281760000	99				500	155;446;447;647;751;1027;1028;1072;1298;1299;1305;1318;1319;1320;1720;2132;2551;2721;2722;2998;2999;3895;3896;4164;4167;4250;4578;4808;4887;5799;5924	True;True;True;True;True;True;True;True;True;True;True;True;True;True;True;True;True;True;True;True;True;True;True;True;True;True;True;True;True;True;True	158;453;454;655;760;1044;1045;1089;1319;1320;1326;1339;1340;1341;1744;2159;2585;2586;2757;2758;3036;3037;3954;3955;4232;4235;4319;4653;4885;4967;5889;6018;6019	197;566;567;568;811;941;1302;1303;1304;1356;1688;1689;1695;1696;1711;1712;1713;2193;2692;3218;3219;3220;3431;3432;3433;3434;3435;3789;3790;3791;5010;5011;5012;5013;5014;5015;5344;5345;5349;5455;5914;6211;6212;6213;6214;6215;6216;6217;6319;7442;7598;7599	269;830;831;832;833;834;835;1210;1405;1406;1407;1408;1409;1410;1411;1412;1413;1961;1962;1963;1964;2044;2586;2587;2588;2589;2590;2591;2592;2593;2594;2595;2602;2603;2624;2625;2626;2627;3326;3327;3328;4072;4073;4074;4075;4932;4933;4934;5247;5248;5249;5250;5251;5252;5790;5791;5792;5793;7635;7636;7637;7638;7639;7640;8092;8093;8094;8095;8096;8097;8098;8099;8100;8101;8102;8106;8251;8252;8959;9460;9461;9…	269;831;835;1210;1409;1962;1963;2044;2590;2595;2602;2624;2625;2626;3328;4072;4933;5247;5250;5790;5793;7635;7637;8100;8106;8251;8959;9470;9643;11332;11581	27;28	389;410
A0A9R0E9T4;A0A9R0CY58;A0A9R0E841;A0A9R0E997;A0A9R0E8N6;A0A9R0E832;A0A2H1V062;A0A2H1VVV8	A0A9R0E9T4;A0A9R0CY58;A0A9R0E841;A0A9R0E997;A0A9R0E8N6;A0A9R0E832;A0A2H1V062;A0A2H1VVV8	8;8;7;7;7;7;4;4	8;8;7;7;7;7;4;4	8;8;7;7;7;7;4;4			tr|A0A9R0E9T4|A0A9R0E9T4_SPOFR Lethal(2) giant larvae protein isoform X2 OS=Spodoptera frugiperda OX=7108 GN=LOC118264650 PE=3 SV=1;tr|A0A9R0CY58|A0A9R0CY58_SPOFR Lethal(2) giant larvae protein isoform X1 OS=Spodoptera frugiperda OX=7108 GN=LOC118264650 PE	8	8	8	8	8	8	8	6.8	6.8	6.8	121.73	1119	1119;1123;1079;1084;1085;1087;676;1432	0	9.8926	6.8	43504000	43504000	887830	887830	12				501	479;1795;3181;3262;3444;4126;5538;5723	True;True;True;True;True;True;True;True	486;1819;3222;3304;3489;4193;5625;5812	607;2280;4014;4111;4374;5285;5286;5287;7128;7350	886;3466;3467;3468;6118;6254;6681;8018;8019;8020;10884;11213	886;3467;6118;6254;6681;8019;10884;11213
A0A9R0CYE0;A0A2H1VJN7;A0A2H1X395	A0A9R0CYE0;A0A2H1VJN7	22;16;6	22;16;6	22;16;6			tr|A0A9R0CYE0|A0A9R0CYE0_SPOFR Stress-induced-phosphoprotein 1 OS=Spodoptera frugiperda OX=7108 GN=LOC118265050 PE=4 SV=1;tr|A0A2H1VJN7|A0A2H1VJN7_SPOFR Stress-induced-phosphoprotein 1 (Fragment) OS=Spodoptera frugiperda OX=7108 GN=SFRICE023424.2 PE=4 SV=1	3	22	22	22	22	22	22	43.1	43.1	43.1	61.724	540	540;417;123	0	166.72	43.1	1064300000	1064300000	34334000	34334000	41				502	85;281;363;457;554;757;1187;1847;1941;2070;2241;2658;2747;2879;3110;3246;3674;4449;5100;5497;5839;5840	True;True;True;True;True;True;True;True;True;True;True;True;True;True;True;True;True;True;True;True;True;True	87;285;369;464;562;766;1205;1872;1967;2097;2270;2694;2784;2916;3150;3288;3724;4521;5182;5584;5930;5931	103;363;462;580;581;695;948;1540;2339;2340;2452;2604;2605;2606;2844;3360;3464;3652;3925;4094;4696;5744;6582;7079;7492;7493	141;531;678;850;851;1034;1035;1036;1037;1422;2339;3559;3560;3561;3724;3945;3946;3947;3948;3949;3950;3951;4384;4385;4386;4387;5135;5298;5598;5996;6237;7174;8678;8679;8680;8681;8682;8683;8684;10041;10818;11413;11414	141;531;678;851;1037;1422;2339;3561;3724;3948;4385;5135;5298;5598;5996;6237;7174;8679;10041;10818;11413;11414
A0A9R0CZ00;A0A2H1VPD5;A0A2H1X1S8	A0A9R0CZ00;A0A2H1VPD5;A0A2H1X1S8	2;1;1	2;1;1	2;1;1			tr|A0A9R0CZ00|A0A9R0CZ00_SPOFR A-kinase anchor protein 200 OS=Spodoptera frugiperda OX=7108 GN=LOC118265337 PE=4 SV=1;tr|A0A2H1VPD5|A0A2H1VPD5_SPOFR SFRICE_004874 (Fragment) OS=Spodoptera frugiperda OX=7108 GN=SFRICE_004874 PE=4 SV=1;tr|A0A2H1X1S8|A0A2H1X1	3	2	2	2	2	2	2	4.8	4.8	4.8	72.838	683	683;161;522	0	4.6233	4.8	26129000	26129000	1045200	1045200	5				503	1000;2895	True;True	1017;2932	1271;3670	1914;5621;5622;5623;5624	1914;5622
A0A9R0CZA2;A0A2H1VF42;A0A2H1V244;A0A650AV41	A0A9R0CZA2;A0A2H1VF42	42;22;13;11	42;22;13;11	42;22;13;11			tr|A0A9R0CZA2|A0A9R0CZA2_SPOFR Translation elongation factor 2 OS=Spodoptera frugiperda OX=7108 GN=LOC118265757 PE=4 SV=1;tr|A0A2H1VF42|A0A2H1VF42_SPOFR SFRICE_013982 (Fragment) OS=Spodoptera frugiperda OX=7108 GN=SFRICE_013982 PE=4 SV=1	4	42	42	42	42	42	42	59.5	59.5	59.5	94.702	844	844;522;239;318	0	323.31	59.5	5668000000	5668000000	123220000	123220000	102				504	310;461;462;612;666;823;824;861;927;1106;1116;1355;1620;1780;1966;2012;2421;2479;2480;2638;2672;2710;2712;2767;2833;3319;3623;3687;3872;4008;4023;4182;4236;4557;4757;4859;4917;5023;5057;5610;5938;6009	True;True;True;True;True;True;True;True;True;True;True;True;True;True;True;True;True;True;True;True;True;True;True;True;True;True;True;True;True;True;True;True;True;True;True;True;True;True;True;True;True;True	314;468;469;620;674;833;834;871;939;1123;1133;1376;1641;1804;1992;2038;2454;2512;2513;2674;2708;2746;2748;2804;2870;3361;3672;3737;3931;4070;4085;4250;4305;4631;4833;4937;4997;5105;5139;5698;6033;6105	393;394;585;586;767;768;769;838;1020;1021;1022;1023;1071;1152;1401;1413;1753;1754;1755;1756;1757;2070;2264;2484;2485;2535;3063;3131;3132;3336;3337;3374;3375;3418;3420;3489;3588;4195;4196;4634;4710;4711;4712;4983;5149;5150;5166;5367;5436;5879;6150;6285;6356;6495;6534;7210;7615;7616;7730;7731	568;569;855;856;1137;1138;1139;1140;1141;1142;1143;1144;1145;1146;1245;1529;1530;1531;1532;1533;1604;1717;2120;2121;2122;2123;2142;2696;2697;2698;2699;2700;3157;3442;3768;3769;3770;3842;4710;4797;4798;5101;5102;5103;5104;5105;5106;5107;5157;5158;5159;5160;5161;5226;5227;5228;5229;5231;5328;5500;5501;5502;6378;6379;7086;7087;7088;7190;7191;7192;7602;7603;7821;7822;7823;7824;7846;8131;8132;8224;889…	568;855;856;1140;1245;1530;1532;1604;1717;2121;2142;2700;3157;3442;3769;3842;4710;4797;4798;5105;5159;5229;5231;5328;5502;6379;7087;7191;7602;7823;7846;8132;8224;8891;9370;9574;9705;9919;9974;10996;11599;11787
A0A9R0D015;A0A2H1WKB7	A0A9R0D015;A0A2H1WKB7	2;1	2;1	2;1			tr|A0A9R0D015|A0A9R0D015_SPOFR serine--tRNA ligase OS=Spodoptera frugiperda OX=7108 GN=LOC118266326 PE=3 SV=1;tr|A0A2H1WKB7|A0A2H1WKB7_SPOFR serine--tRNA ligase OS=Spodoptera frugiperda OX=7108 GN=SFRICE_019475 PE=3 SV=1	2	2	2	2	2	2	2	6.7	6.7	6.7	55.84	493	493;504	0	7.6885	6.7	32315000	32315000	1077200	1077200	2				505	1383;2652	True;True	1404;2688	1791;3353	2751;5126	2751;5126
A0A9R0D0P2;A0A9E8D139	A0A9R0D0P2;A0A9E8D139	5;4	5;4	5;4			tr|A0A9R0D0P2|A0A9R0D0P2_SPOFR Ribosomal protein S6 kinase OS=Spodoptera frugiperda OX=7108 GN=LOC118266775 PE=3 SV=1;tr|A0A9E8D139|A0A9E8D139_SPOFR Ribosomal protein S6 kinase OS=Spodoptera frugiperda OX=7108 GN=S6K1 PE=2 SV=1	2	5	5	5	5	5	5	12.6	12.6	12.6	51.001	453	453;453	0	9.8209	12.6	64661000	64661000	4973900	4973900	7				506	2221;3112;3325;3554;5699	True;True;True;True;True	2249;3152;3367;3602;5788	2813;3927;4203;4506;7325	4329;6000;6386;6387;6867;6868;11177	4329;6000;6386;6867;11177
A0A9R0D114;A0A9R0D0X9;A0A2H1VMP5	A0A9R0D114;A0A9R0D0X9;A0A2H1VMP5	2;2;1	2;2;1	2;2;1			tr|A0A9R0D114|A0A9R0D114_SPOFR Acyl-coenzyme A oxidase OS=Spodoptera frugiperda OX=7108 GN=LOC118266912 PE=3 SV=1;tr|A0A9R0D0X9|A0A9R0D0X9_SPOFR Acyl-coenzyme A oxidase OS=Spodoptera frugiperda OX=7108 GN=LOC118266912 PE=3 SV=1;tr|A0A2H1VMP5|A0A2H1VMP5_SPO	3	2	2	2	2	2	2	3.5	3.5	3.5	78.637	692	692;689;305	0.0028986	1.5216	3.5	20234000	20234000	505840	505840	1				507	151;2442	True;True	154;2475	193;3084	265;4733	265;4733
A0A9R0D1U9;A0A2H1WL82;Q8ISS0	A0A9R0D1U9;A0A2H1WL82	11;7;1	11;7;1	11;7;1			tr|A0A9R0D1U9|A0A9R0D1U9_SPOFR ATP-binding cassette sub-family F member 3 OS=Spodoptera frugiperda OX=7108 GN=LOC118267339 PE=3 SV=1;tr|A0A2H1WL82|A0A2H1WL82_SPOFR SFRICE_004375 (Fragment) OS=Spodoptera frugiperda OX=7108 GN=SFRICE_004375 PE=3 SV=1	3	11	11	11	11	11	11	20.7	20.7	20.7	79.419	705	705;520;47	0	9.8624	20.7	130320000	130320000	4654400	4654400	15				508	1137;1181;1903;2394;3259;4671;4796;5050;5513;6000;6010	True;True;True;True;True;True;True;True;True;True;True	1154;1199;1928;2425;3301;4746;4872;5132;5600;6096;6106	1438;1531;1532;2400;3028;4108;6041;6194;6526;7100;7717;7732	2186;2324;2325;3645;3646;4661;4662;4663;4664;6251;9212;9436;9961;10845;11765;11788	2186;2325;3645;4663;6251;9212;9436;9961;10845;11765;11788
A0A9R0D243;A0A2H1V5J4	A0A9R0D243;A0A2H1V5J4	15;12	15;12	15;12			tr|A0A9R0D243|A0A9R0D243_SPOFR H(+)-transporting two-sector ATPase OS=Spodoptera frugiperda OX=7108 GN=LOC118267501 PE=3 SV=1;tr|A0A2H1V5J4|A0A2H1V5J4_SPOFR H(+)-transporting two-sector ATPase OS=Spodoptera frugiperda OX=7108 GN=SFRICE_000478 PE=3 SV=1	2	15	15	15	15	15	15	29.5	29.5	29.5	68.104	616	616;616	0	38.189	29.5	377140000	377140000	10193000	10193000	22				509	95;272;715;976;1142;1482;1520;1891;3375;3939;4118;4945;5044;5695;5722	True;True;True;True;True;True;True;True;True;True;True;True;True;True;True	97;276;724;992;1159;1503;1541;1916;3418;3998;4185;5025;5126;5784;5811	113;353;897;1245;1445;1911;1954;1955;2386;4299;5061;5277;6393;6520;7319;7349	153;513;1331;1332;1333;1869;2194;2949;2950;3002;3003;3004;3005;3626;6575;7702;8009;8010;9766;9954;11167;11212	153;513;1332;1869;2194;2949;3004;3626;6575;7702;8010;9766;9954;11167;11212
A0A9R0D263;A0A2H1X1L9	A0A9R0D263;A0A2H1X1L9	6;4	6;4	6;4			tr|A0A9R0D263|A0A9R0D263_SPOFR Proteasome subunit alpha type OS=Spodoptera frugiperda OX=7108 GN=LOC118267530 PE=3 SV=1;tr|A0A2H1X1L9|A0A2H1X1L9_SPOFR Proteasome subunit alpha type (Fragment) OS=Spodoptera frugiperda OX=7108 GN=SFRICE_038074 PE=3 SV=1	2	6	6	6	6	6	6	23.9	23.9	23.9	28.188	255	255;159	0	9.984	23.9	196270000	196270000	13085000	13085000	8				510	556;1173;2414;4282;4814;5397	True;True;True;True;True;True	564;1191;2446;4351;4891;5483	697;1483;3054;5490;6225;6960	1039;2248;4701;8295;8296;8297;9482;10637	1039;2248;4701;8296;9482;10637
A0A9R0D2Z9;A0A9R0D343;A0A2H1WMU6	A0A9R0D2Z9;A0A9R0D343;A0A2H1WMU6	2;2;1	2;2;1	2;2;1			tr|A0A9R0D2Z9|A0A9R0D2Z9_SPOFR Myosin heavy chain 95F isoform X1 OS=Spodoptera frugiperda OX=7108 GN=LOC118268178 PE=3 SV=1;tr|A0A9R0D343|A0A9R0D343_SPOFR Myosin heavy chain 95F isoform X2 OS=Spodoptera frugiperda OX=7108 GN=LOC118268178 PE=3 SV=1;tr|A0A2H	3	2	2	2	2	2	2	2.2	2.2	2.2	143.26	1251	1251;1236;135	0	4.3329	2.2	3991700	3991700	60480	60480	3				511	2106;2427	True;True	2133;2460	2659;3069	4027;4028;4716	4028;4716
A0A9R0D344;A0A9R0D312;A0A2H1WV13	A0A9R0D344;A0A9R0D312	3;3;1	3;3;1	3;3;1			tr|A0A9R0D344|A0A9R0D344_SPOFR ATP synthase subunit beta OS=Spodoptera frugiperda OX=7108 GN=LOC118268204 PE=3 SV=1;tr|A0A9R0D312|A0A9R0D312_SPOFR ATP synthase subunit beta OS=Spodoptera frugiperda OX=7108 GN=LOC118268182 PE=3 SV=1	3	3	3	3	3	3	3	8.2	8.2	8.2	55.019	515	515;513;173	0	4.88	8.2	34024000	34024000	1215100	1215100	6				512	213;2527;5305	True;True;True	217;2561;5388	283;3191;6836	425;426;4893;10442;10443;10444	425;4893;10443
A0A9R0D351;A0A2H1WM38	A0A9R0D351;A0A2H1WM38	7;6	7;6	7;6			tr|A0A9R0D351|A0A9R0D351_SPOFR NEDD8-activating enzyme E1 catalytic subunit OS=Spodoptera frugiperda OX=7108 GN=LOC118268166 PE=3 SV=1;tr|A0A2H1WM38|A0A2H1WM38_SPOFR NEDD8-activating enzyme E1 catalytic subunit OS=Spodoptera frugiperda OX=7108 GN=SFRICE_01	2	7	7	7	7	7	7	21.7	21.7	21.7	50.326	451	451;451	0	14.172	21.7	37300000	37300000	1434600	1434600	7				513	1536;2109;2634;4470;4620;4775;5539	True;True;True;True;True;True;True	1557;2136;2669;4542;4695;4851;5626	1974;2662;3327;5773;5983;6172;7129	3027;3028;4032;5089;8740;9126;9404;10885	3028;4032;5089;8740;9126;9404;10885
A0A9R0D353;A0A9R0D358;A0A2H1WGT1;A0A2H1WDS0	A0A9R0D353;A0A9R0D358;A0A2H1WGT1	4;4;3;1	4;4;3;1	4;4;3;1			tr|A0A9R0D353|A0A9R0D353_SPOFR Protein DDI1 homolog 2 isoform X2 OS=Spodoptera frugiperda OX=7108 GN=LOC118268186 PE=3 SV=1;tr|A0A9R0D358|A0A9R0D358_SPOFR Protein DDI1 homolog 2 isoform X1 OS=Spodoptera frugiperda OX=7108 GN=LOC118268186 PE=3 SV=1;tr|A0A2H	4	4	4	4	4	4	4	10.7	10.7	10.7	49.423	440	440;468;264;208	0	14.636	10.7	39433000	39433000	2319600	2319600	6				514	1235;2187;2886;3723	True;True;True;True	1255;2214;2923;3773	1609;2760;2761;3660;4753	2451;4230;4231;5608;5609;7245	2451;4231;5608;7245
A0A9R0D3K2	A0A9R0D3K2	25	3	3			tr|A0A9R0D3K2|A0A9R0D3K2_SPOFR Aldehyde dehydrogenase, cytosolic 1-like OS=Spodoptera frugiperda OX=7108 GN=LOC118268489 PE=3 SV=1	1	25	3	3	25	3	3	58.4	12.6	12.6	52.124	486	486	0	225.53	58.4	150190000	150190000	5562600	5562600	12				515	384;1068;1252;1444;1602;2216;2358;2359;2732;3072;3191;3192;4129;4494;4994;5213;5278;5331;5530;5676;5698;5704;5867;5868;5913	True;False;False;False;False;False;True;True;False;False;False;False;False;False;False;False;False;False;False;False;False;False;False;False;False	391;1085;1273;1465;1623;2244;2389;2390;2768;2769;3111;3233;3234;4196;4566;5076;5296;5361;5414;5617;5765;5787;5793;5960;5961;6006;6007	486;487;1352;1629;1630;1866;2051;2803;2804;2805;2806;2807;2985;2986;2987;3447;3448;3879;4026;4027;4028;5290;5291;5804;6460;6461;6724;6806;6807;6865;7118;7294;7295;7296;7297;7323;7324;7331;7524;7525;7584;7585;7586	706;707;708;709;2034;2035;2036;2037;2038;2039;2485;2486;2487;2488;2489;2490;2491;2492;2493;2494;2863;2864;3120;3121;3122;4301;4302;4303;4304;4305;4306;4307;4308;4309;4310;4311;4312;4313;4314;4315;4316;4587;4588;4589;4590;4591;4592;4593;4594;5267;5268;5269;5918;5919;6132;6133;6134;6135;8023;8024;8025;8785;9866;9867;10262;10401;10402;10484;10867;10868;10869;11117;11118;11119;11120;11121;11122;11123…	709;2037;2486;2864;3122;4314;4589;4594;5268;5918;6132;6135;8024;8785;9866;10262;10402;10484;10867;11118;11173;11184;11458;11459;11558	13;15	83;100
A0A9R0DYX5;A0A9R0DZI6;A0A9R0D413;A0A9R0EYC0;A0A9R0F0C1;A0A2H1VQZ7;A0A9R0DYA0;A0A9R0DZ28	A0A9R0DYX5;A0A9R0DZI6;A0A9R0D413;A0A9R0EYC0;A0A9R0F0C1;A0A2H1VQZ7;A0A9R0DYA0;A0A9R0DZ28	3;3;3;3;3;2;2;2	3;3;3;3;3;2;2;2	3;3;3;3;3;2;2;2			tr|A0A9R0DYX5|A0A9R0DYX5_SPOFR CCR4-NOT transcription complex subunit 3 isoform X3 OS=Spodoptera frugiperda OX=7108 GN=LOC118268850 PE=3 SV=1;tr|A0A9R0DZI6|A0A9R0DZI6_SPOFR CCR4-NOT transcription complex subunit 3 isoform X2 OS=Spodoptera frugiperda OX=710	8	3	3	3	3	3	3	6.9	6.9	6.9	74.679	669	669;672;673;675;679;659;661;665	0	5.2964	6.9	44342000	44342000	2111500	2111500	8				517	184;1959;5325	True;True;True	188;1985;5408	246;247;248;2476;2477;6859	369;370;371;372;373;3759;3760;10475	372;3760;10475
A0A9R0E8N2;A0A9R0EJT9;A0A9R0D4G8;A0A9R0EK07;A0A2H1VL69;A0A2H1VPM5	A0A9R0E8N2;A0A9R0EJT9;A0A9R0D4G8;A0A9R0EK07;A0A2H1VL69;A0A2H1VPM5	2;2;2;2;1;1	2;2;2;2;1;1	2;2;2;2;1;1			tr|A0A9R0E8N2|A0A9R0E8N2_SPOFR 6-phosphofructo-2-kinase/fructose-2, 6-bisphosphatase isoform X4 OS=Spodoptera frugiperda OX=7108 GN=LOC118269058 PE=3 SV=1;tr|A0A9R0EJT9|A0A9R0EJT9_SPOFR 6-phosphofructo-2-kinase/fructose-2, 6-bisphosphatase isoform X3 OS=Sp	6	2	2	2	2	2	2	4.4	4.4	4.4	54.548	473	473;482;509;518;162;186	0.0015504	2.0165	4.4	14780000	14780000	492650	492650	2				518	3045;3553	True;True	3084;3601	3846;4505	5869;6866	5869;6866
A0A9R0D4W1;A0A2H1WB06	A0A9R0D4W1;A0A2H1WB06	6;3	6;3	6;3			tr|A0A9R0D4W1|A0A9R0D4W1_SPOFR GATOR complex protein MIOS OS=Spodoptera frugiperda OX=7108 GN=LOC118269197 PE=3 SV=1;tr|A0A2H1WB06|A0A2H1WB06_SPOFR SFRICE_006654 OS=Spodoptera frugiperda OX=7108 GN=SFRICE_006654 PE=3 SV=1	2	6	6	6	6	6	6	10.1	10.1	10.1	96.218	890	890;890	0	13.912	10.1	84756000	84756000	1765800	1765800	5				519	342;395;1510;1696;3977;5200	True;True;True;True;True;True	347;402;1531;1720;4036;5283	435;500;1944;2163;5108;6707	635;729;2992;3286;7767;10237	635;729;2992;3286;7767;10237
A0A9R0EKR0;A0A9R0D5C1;A0A9R0EKK1;A0A9R0D5A0;A0A9R0D578;A0A9R0D596;A0A2H1VG83;A0A2H1VG00	A0A9R0EKR0;A0A9R0D5C1;A0A9R0EKK1;A0A9R0D5A0;A0A9R0D578;A0A9R0D596;A0A2H1VG83	26;26;26;26;26;26;24;1	26;26;26;26;26;26;24;1	25;25;25;25;25;25;23;1			tr|A0A9R0EKR0|A0A9R0EKR0_SPOFR Malic enzyme OS=Spodoptera frugiperda OX=7108 GN=LOC118269578 PE=3 SV=1;tr|A0A9R0D5C1|A0A9R0D5C1_SPOFR Malic enzyme OS=Spodoptera frugiperda OX=7108 GN=LOC118269578 PE=3 SV=1;tr|A0A9R0EKK1|A0A9R0EKK1_SPOFR Malic enzyme OS=Spo	8	26	26	25	26	26	25	59.3	59.3	59.3	67.402	612	612;632;633;648;648;657;573;110	0	201.56	59.3	1293100000	1293100000	36946000	36946000	38				520	113;225;250;456;503;806;1644;1802;1917;2342;2443;2633;2675;3499;3708;3889;4110;4177;4368;4794;5087;5837;5853;5884;5907;5981	True;True;True;True;True;True;True;True;True;True;True;True;True;True;True;True;True;True;True;True;True;True;True;True;True;True	116;229;254;463;510;816;1666;1826;1942;2373;2476;2668;2711;3545;3758;3948;4177;4245;4439;4870;5169;5928;5946;5977;6000;6077	147;297;327;579;633;1002;2099;2287;2415;2416;2969;3085;3326;3379;4441;4734;5003;5269;5361;5642;6192;6569;7489;7508;7547;7577;7666	211;443;478;849;939;1501;1502;3195;3196;3475;3674;3675;4567;4734;4735;4736;5087;5088;5168;6780;7218;7627;8001;8124;8539;9433;9434;10023;10024;10025;10026;10027;11410;11434;11495;11496;11543;11664	211;443;478;849;939;1502;3196;3475;3674;4567;4734;5088;5168;6780;7218;7627;8001;8124;8539;9434;10025;11410;11434;11496;11543;11664
A0A9R0D5W7;A0A2H1WU70;A0A9R0D5Q3	A0A9R0D5W7;A0A2H1WU70;A0A9R0D5Q3	30;20;20	30;20;20	21;20;20			tr|A0A9R0D5W7|A0A9R0D5W7_SPOFR Nonsense-mediated mRNA decay factor SMG8 OS=Spodoptera frugiperda OX=7108 GN=LOC118269743 PE=3 SV=1;tr|A0A2H1WU70|A0A2H1WU70_SPOFR Nonsense-mediated mRNA decay factor SMG8 (Fragment) OS=Spodoptera frugiperda OX=7108 GN=SFRICE	3	30	30	21	30	30	21	48.8	48.8	35.5	89.894	832	832;666;668	0	287.67	48.8	3355300000	3355300000	86034000	86034000	80				521	6;46;385;438;445;518;527;670;1056;1562;2258;2324;2412;2668;3013;3032;3417;3468;3476;3779;3780;3886;4146;4169;4845;5553;5662;5679;5832;5901	True;True;True;True;True;True;True;True;True;True;True;True;True;True;True;True;True;True;True;True;True;True;True;True;True;True;True;True;True;True	6;48;392;445;452;525;534;678;1073;1583;2287;2355;2444;2704;3051;3071;3462;3513;3522;3833;3834;3945;4213;4237;4923;5640;5750;5768;5922;5994	7;8;57;58;488;489;556;564;565;651;664;842;1338;2009;2864;2944;2945;2946;2947;3052;3370;3805;3806;3807;3808;3830;4346;4404;4414;4873;4874;4998;4999;5316;5351;5352;6268;7146;7147;7273;7274;7301;7302;7481;7571	11;12;13;79;80;710;711;712;814;815;828;829;965;966;967;968;987;988;1251;1252;1253;1254;2019;3071;3072;4420;4525;4526;4527;4528;4529;4530;4531;4532;4533;4534;4535;4536;4537;4538;4699;5153;5814;5815;5816;5817;5849;6640;6731;6742;6743;6744;7445;7446;7447;7622;7623;8059;8110;8111;8112;9553;10913;10914;10915;10916;10917;10918;11080;11081;11082;11141;11142;11143;11144;11145;11401;11531;11532;11533	11;79;711;814;828;966;988;1251;2019;3071;4420;4529;4699;5153;5816;5849;6640;6731;6742;7445;7447;7622;8059;8111;9553;10915;11080;11142;11401;11532	51	296
A0A9R0EL17;A0A9R0D5X8;A0A2H1V0P1	A0A9R0EL17;A0A9R0D5X8;A0A2H1V0P1	5;5;4	5;5;4	5;5;4			tr|A0A9R0EL17|A0A9R0EL17_SPOFR Pyruvate dehydrogenase E1 component subunit beta OS=Spodoptera frugiperda OX=7108 GN=LOC118269912 PE=4 SV=1;tr|A0A9R0D5X8|A0A9R0D5X8_SPOFR Pyruvate dehydrogenase E1 component subunit beta OS=Spodoptera frugiperda OX=7108 GN=L	3	5	5	5	5	5	5	17.2	17.2	17.2	39.038	361	361;368;375	0	10.266	17.2	27663000	27663000	1536800	1536800	7				522	1970;4696;5011;5547;5583	True;True;True;True;True	1996;4771;5093;5634;5670	2489;6079;6483;7139;7179	3777;3778;9267;9900;10903;10956;10957	3778;9267;9900;10903;10957
A0A9R0D626;A0A9R0D616;A0A2H1VL09	A0A9R0D626;A0A9R0D616;A0A2H1VL09	6;6;5	6;6;5	6;6;5			tr|A0A9R0D626|A0A9R0D626_SPOFR LIM domain-containing protein OS=Spodoptera frugiperda OX=7108 GN=LOC118270026 PE=4 SV=1;tr|A0A9R0D616|A0A9R0D616_SPOFR LIM domain-containing protein OS=Spodoptera frugiperda OX=7108 GN=LOC118270026 PE=4 SV=1;tr|A0A2H1VL09|A0	3	6	6	6	6	6	6	24.5	24.5	24.5	39.081	339	339;333;229	0	14.108	24.5	150790000	150790000	7936500	7936500	7				523	375;630;763;1661;1748;3714	True;True;True;True;True;True	382;638;772;1684;1772;3764	477;792;954;2120;2225;4741	697;1183;1431;3227;3372;3373;7228;7229	697;1183;1431;3227;3373;7228
A0A9R0D6B8;A0A2H1X088	A0A9R0D6B8;A0A2H1X088	13;12	13;12	13;12			tr|A0A9R0D6B8|A0A9R0D6B8_SPOFR Vacuolar proton pump subunit B OS=Spodoptera frugiperda OX=7108 GN=LOC118270369 PE=3 SV=1;tr|A0A2H1X088|A0A2H1X088_SPOFR Vacuolar proton pump subunit B (Fragment) OS=Spodoptera frugiperda OX=7108 GN=SFRICE_014914 PE=3 SV=1	2	13	13	13	13	13	13	36.6	36.6	36.6	54.951	494	494;465	0	45.979	36.6	195070000	195070000	7502800	7502800	21				524	588;1127;1606;1762;2508;2514;2682;3909;4063;4283;4624;5164;5244	True;True;True;True;True;True;True;True;True;True;True;True;True	596;1144;1627;1786;2542;2548;2718;3968;4127;4352;4699;5247;5327	735;1427;2055;2245;3166;3172;3173;3386;5028;5212;5491;5988;6654;6763	1092;1093;2173;3128;3409;3410;4854;4855;4863;4864;4865;4866;4867;4868;5178;7654;7909;8298;9135;10142;10329;10330	1092;2173;3128;3409;4855;4865;5178;7654;7909;8298;9135;10142;10330
A0A9R0D6C8;A0A2H1X028	A0A9R0D6C8;A0A2H1X028	21;20	21;20	21;20			tr|A0A9R0D6C8|A0A9R0D6C8_SPOFR Serine/threonine-protein phosphatase PP2A 65 kDa regulatory subunit OS=Spodoptera frugiperda OX=7108 GN=LOC118270367 PE=3 SV=1;tr|A0A2H1X028|A0A2H1X028_SPOFR SFRICE_014915 OS=Spodoptera frugiperda OX=7108 GN=SFRICE_014915 PE=	2	21	21	21	21	21	21	50.7	50.7	50.7	65.297	590	590;590	0	135.46	50.7	1242000000	1242000000	41399000	41399000	39				525	59;60;204;478;539;858;935;995;1642;2902;2908;3214;3366;3520;3654;4554;4688;5494;5543;5735;5869	True;True;True;True;True;True;True;True;True;True;True;True;True;True;True;True;True;True;True;True;True	61;62;208;485;546;868;947;1012;1664;2939;2945;3256;3409;3568;3703;4628;4763;5581;5630;5825;5962	74;75;270;606;676;677;678;1067;1068;1160;1266;2097;3677;3684;4058;4290;4469;4670;5875;5876;6064;7075;7076;7133;7134;7364;7526	105;106;404;405;885;1010;1011;1012;1013;1600;1601;1727;1728;1729;1907;1908;3191;3192;5637;5645;5646;6184;6185;6563;6815;7142;8886;8887;9249;10810;10811;10812;10813;10890;10891;10892;10893;11229;11460	105;106;405;885;1013;1601;1727;1908;3191;5637;5645;6185;6563;6815;7142;8887;9249;10813;10893;11229;11460
A0A9R0D6G3;A0A2H1WG98;A0A2H1W773	A0A9R0D6G3;A0A2H1WG98	7;5;2	7;5;2	7;5;2			tr|A0A9R0D6G3|A0A9R0D6G3_SPOFR Protein O-GlcNAcase OS=Spodoptera frugiperda OX=7108 GN=LOC118270400 PE=4 SV=1;tr|A0A2H1WG98|A0A2H1WG98_SPOFR SFRICE_013504 (Fragment) OS=Spodoptera frugiperda OX=7108 GN=SFRICE_013504 PE=4 SV=1	3	7	7	7	7	7	7	11.7	11.7	11.7	116.84	1049	1049;765;283	0	14.17	11.7	21473000	21473000	477170	477170	8				526	572;760;1002;3302;4772;5466;5565	True;True;True;True;True;True;True	580;769;1019;3344;4848;5553;5652	716;951;1273;4172;6168;7043;7159	1069;1425;1426;1916;1917;6350;9394;10760;10932	1069;1425;1917;6350;9394;10760;10932
A0A9R0D6I0;A0A2H1VVL7	A0A9R0D6I0;A0A2H1VVL7	6;5	6;5	6;5			tr|A0A9R0D6I0|A0A9R0D6I0_SPOFR Prefoldin subunit 1 OS=Spodoptera frugiperda OX=7108 GN=LOC118270405 PE=3 SV=1;tr|A0A2H1VVL7|A0A2H1VVL7_SPOFR SFRICE_006424 OS=Spodoptera frugiperda OX=7108 GN=SFRICE_006424 PE=3 SV=1	2	6	6	6	6	6	6	43	43	43	15.045	128	128;128	0	23.013	43	264920000	264920000	26492000	26492000	8				527	157;1553;2554;2555;2595;3701	True;True;True;True;True;True	160;1574;2589;2590;2630;3751	199;1997;1998;3223;3224;3277;4727	271;3053;3054;3055;3056;4937;4938;5022;7210	271;3055;4937;4938;5022;7210
A0A9R0D6R2;A0A2H1WU03	A0A9R0D6R2;A0A2H1WU03	19;18	19;18	19;18			tr|A0A9R0D6R2|A0A9R0D6R2_SPOFR Aminopeptidase W07G4.4 OS=Spodoptera frugiperda OX=7108 GN=LOC118270812 PE=3 SV=1;tr|A0A2H1WU03|A0A2H1WU03_SPOFR SFRICE_024056 OS=Spodoptera frugiperda OX=7108 GN=SFRICE_024056 PE=3 SV=1	2	19	19	19	19	19	19	46	46	46	53.556	509	509;509	0	123.13	46	1345100000	1345100000	46383000	46383000	37				528	79;180;409;428;452;637;797;904;1029;1047;1711;1807;2018;2046;4059;4293;4466;5691;5725	True;True;True;True;True;True;True;True;True;True;True;True;True;True;True;True;True;True;True	81;184;416;435;459;645;807;915;1046;1064;1735;1831;2044;2072;4123;4362;4538;5780;5814;5815	97;239;516;544;545;574;800;992;1124;1305;1327;2181;2292;2293;2541;2577;5208;5540;5768;5769;7314;7315;7352;7353	131;354;750;751;798;799;841;842;1193;1489;1490;1679;1965;2000;2001;2002;2003;2004;2005;3313;3492;3493;3494;3850;3908;7902;7903;7904;7905;8403;8733;8734;8735;11161;11162;11163;11216;11217	131;354;751;798;841;1193;1489;1679;1965;2003;3313;3494;3850;3908;7904;8403;8733;11162;11217	52	316
A0A9R0DQU4;A0A9R0DQV4;A0A9R0DRI7;A0A9R0DRJ5;A0A9R0DRT1;A0A9R0D6U1;A0A9R0ELV3;A0A9R0DR90;A0A9R0DRA3;A0A9R0EWK2;A0A9R0DRN0;A0A9R0EVT0;A0A9R0DS92;A0A9R0EWB1;A0A9R0DRI4;A0A9R0DRK1;A0A9R0D721;A0A9R0D6T1;A0A9R0EUW4;A0A9R0EXN4;A0A9R0DS44;A0A2H1W4B4;A0A2H1WTR7	A0A9R0DQU4;A0A9R0DQV4;A0A9R0DRI7;A0A9R0DRJ5;A0A9R0DRT1;A0A9R0D6U1;A0A9R0ELV3;A0A9R0DR90;A0A9R0DRA3;A0A9R0EWK2;A0A9R0DRN0;A0A9R0EVT0;A0A9R0DS92;A0A9R0EWB1;A0A9R0DRI4;A0A9R0DRK1;A0A9R0D721;A0A9R0D6T1;A0A9R0EUW4;A0A9R0EXN4;A0A9R0DS44;A0A2H1W4B4	5;5;5;5;5;5;5;5;5;5;5;5;5;5;5;5;5;5;5;5;5;3;2	5;5;5;5;5;5;5;5;5;5;5;5;5;5;5;5;5;5;5;5;5;3;2	5;5;5;5;5;5;5;5;5;5;5;5;5;5;5;5;5;5;5;5;5;3;2			tr|A0A9R0DQU4|A0A9R0DQU4_SPOFR Neurobeachin isoform X1 OS=Spodoptera frugiperda OX=7108 GN=LOC118270887 PE=4 SV=1;tr|A0A9R0DQV4|A0A9R0DQV4_SPOFR Neurobeachin isoform X18 OS=Spodoptera frugiperda OX=7108 GN=LOC118270887 PE=4 SV=1;tr|A0A9R0DRI7|A0A9R0DRI7_SP	23	5	5	5	5	5	5	2.4	2.4	2.4	359.79	3238	3238;3201;3237;3236;3232;3228;3222;3219;3218;3217;3213;3180;3167;3160;3150;3144;3140;3134;3131;3130;3102;2391;703	0	9.3157	2.4	32519000	32519000	208460	208460	6				529	17;3033;4586;5281;5804	True;True;True;True;True	17;3072;4661;5364;5894	20;3831;5948;6810;7447	28;5850;9068;10405;11341;11342	28;5850;9068;10405;11342
A0A9R0ELI2;A0A9R0D6Y9;A0A9R0D6Z1;A0A9R0D6V8;A0A9R0D6X3;A0A2H1VAM0;A0A2H1X3Z3	A0A9R0ELI2;A0A9R0D6Y9;A0A9R0D6Z1;A0A9R0D6V8;A0A9R0D6X3	15;15;15;15;15;7;4	15;15;15;15;15;7;4	15;15;15;15;15;7;4			tr|A0A9R0ELI2|A0A9R0ELI2_SPOFR Cleavage and polyadenylation specificity factor subunit 6 OS=Spodoptera frugiperda OX=7108 GN=LOC118270908 PE=3 SV=1;tr|A0A9R0D6Y9|A0A9R0D6Y9_SPOFR Cleavage and polyadenylation specificity factor subunit 6 OS=Spodoptera frugi	7	15	15	15	15	15	15	28.8	28.8	28.8	76.612	713	713;717;727;729;733;500;165	0	277.93	28.8	27590000000	27590000000	1452100000	1452100000	99				530	25;96;576;577;1139;1751;1909;2449;2716;2837;3733;4199;4341;4872;5245	True;True;True;True;True;True;True;True;True;True;True;True;True;True;True	25;98;584;585;1156;1775;1934;2482;2752;2874;3783;4268;4412;4951;4952;5328	30;114;115;116;117;118;119;120;121;122;123;124;125;126;127;720;721;722;1440;1441;2228;2229;2230;2231;2232;2233;2407;3091;3092;3424;3425;3426;3595;3596;4763;5393;5611;5612;6299;6300;6764	40;154;155;156;157;158;159;160;161;162;163;164;165;166;167;168;169;170;171;172;173;174;175;176;177;178;179;180;181;1073;1074;1075;1076;1077;2188;2189;2190;3376;3377;3378;3379;3380;3381;3382;3383;3384;3385;3386;3387;3388;3389;3390;3655;3656;3657;3658;3659;3660;3661;3662;4744;4745;4746;4747;4748;4749;4750;5236;5237;5238;5239;5240;5241;5515;5516;7258;8165;8166;8498;8499;8500;8501;9605;9606;9607;9608…	40;154;1074;1076;2190;3377;3658;4750;5241;5516;7258;8165;8501;9610;10338	53	188
A0A9R0D6Z0	A0A9R0D6Z0	1	1	1			tr|A0A9R0D6Z0|A0A9R0D6Z0_SPOFR Uncharacterized protein LOC118270747 OS=Spodoptera frugiperda OX=7108 GN=LOC118270747 PE=4 SV=1	1	1	1	1	1	1	1	0.9	0.9	0.9	119.83	1042	1042	0.0057061	1.39	0.9	241920000	241920000	4480000	4480000	3				531	2350	TRUE	2381	2977	4577;4578;4579	4578
A0A9R0D773;A0A2H1WG71	A0A9R0D773;A0A2H1WG71	3;2	3;2	3;2			tr|A0A9R0D773|A0A9R0D773_SPOFR Pyruvate dehydrogenase E1 component subunit alpha OS=Spodoptera frugiperda OX=7108 GN=LOC118271154 PE=4 SV=1;tr|A0A2H1WG71|A0A2H1WG71_SPOFR SFRICE_012732 (Fragment) OS=Spodoptera frugiperda OX=7108 GN=SFRICE_012732 PE=4 SV=1	2	3	3	3	3	3	3	8	8	8	43.474	399	399;376	0	5.5517	8	60228000	60228000	2409100	2409100	5				532	1915;2317;4565	True;True;True	1940;2347;4639	2413;2934;5888;5889	3670;3671;4512;8900;8901	3670;4512;8901
A0A9R0F0B4;A0A9R0EXD0;A0A9R0D7G0;A0A2H1VXF5;A0A2H1W6A4;A0A2H1W9T9	A0A9R0F0B4;A0A9R0EXD0;A0A9R0D7G0	20;20;20;6;6;2	20;20;20;6;6;2	20;20;20;6;6;2			tr|A0A9R0F0B4|A0A9R0F0B4_SPOFR Adenylyl cyclase-associated protein 1 isoform X3 OS=Spodoptera frugiperda OX=7108 GN=LOC118271515 PE=3 SV=1;tr|A0A9R0EXD0|A0A9R0EXD0_SPOFR Adenylyl cyclase-associated protein OS=Spodoptera frugiperda OX=7108 GN=LOC118271515 P	6	20	20	20	20	20	20	65.1	65.1	65.1	46.245	424	424;539;759;77;320;77	0	209.06	65.1	2584400000	2584400000	129220000	129220000	56				533	502;600;1240;1838;1892;4312;4395;4520;4521;4615;4679;4823;4963;5041;5613;5647;5648;5709;5810;5900	True;True;True;True;True;True;True;True;True;True;True;True;True;True;True;True;True;True;True;True	509;608;1260;1261;1863;1917;4381;4466;4593;4594;4690;4754;4900;4901;5043;5123;5701;5735;5736;5798;5900;5993	631;632;750;1614;1615;2330;2387;2388;5566;5567;5675;5676;5677;5835;5836;5837;5838;5978;6054;6242;6243;6417;6418;6517;7213;7254;7255;7336;7456;7570	935;936;937;938;1113;1114;1115;2456;2457;2458;3550;3627;3628;3629;3630;8437;8438;8439;8581;8582;8583;8584;8585;8586;8831;8832;8833;8834;8835;8836;8837;9119;9230;9231;9232;9233;9234;9235;9516;9517;9800;9801;9802;9949;9950;9951;11000;11055;11056;11192;11193;11194;11195;11196;11366;11529;11530	935;1113;2457;3550;3629;8438;8584;8834;8837;9119;9230;9517;9801;9951;11000;11055;11056;11195;11366;11529	54;55	116;384
A0A9R0D7M6;A0A2H1WD52	A0A9R0D7M6;A0A2H1WD52	8;6	8;6	8;6			tr|A0A9R0D7M6|A0A9R0D7M6_SPOFR Chromatin assembly factor 1 p55 subunit OS=Spodoptera frugiperda OX=7108 GN=LOC118271626 PE=3 SV=1;tr|A0A2H1WD52|A0A2H1WD52_SPOFR SFRICE_025796 (Fragment) OS=Spodoptera frugiperda OX=7108 GN=SFRICE_025796 PE=3 SV=1	2	8	8	8	8	8	8	27.8	27.8	27.8	48.623	432	432;369	0	50.61	27.8	476810000	476810000	34058000	34058000	15				534	1719;2183;2335;3148;3322;4894;5211;5470	True;True;True;True;True;True;True;True	1743;2210;2366;3189;3364;4974;5294;5557	2192;2755;2756;2961;2962;3972;4199;6328;6722;7047	3325;4215;4216;4217;4218;4219;4220;4221;4556;4557;6062;6382;9661;10260;10765;10766	3325;4220;4557;6062;6382;9661;10260;10765
A0A9R0D7Q1;A0A2H1WT53	A0A9R0D7Q1;A0A2H1WT53	3;2	3;2	3;2			tr|A0A9R0D7Q1|A0A9R0D7Q1_SPOFR UPF0047 protein YjbQ OS=Spodoptera frugiperda OX=7108 GN=LOC118271662 PE=3 SV=1;tr|A0A2H1WT53|A0A2H1WT53_SPOFR SFRICE_000983 OS=Spodoptera frugiperda OX=7108 GN=SFRICE_000983 PE=3 SV=1	2	3	3	3	3	3	3	23	23	23	18.15	165	165;147	0	6.6137	23	34362000	34362000	3818000	3818000	3				535	80;1823;2867	True;True;True	82;1848;2904	98;2312;3634	132;3521;5572	132;3521;5572
A0A9R0D7Q9;A0A9R0DMN7;A0A9R0D7S5;A0A9R0DMT8;A0A9R0DM73;A0A9R0DNA6;A0A2H1WH47;A0A2H1WZH0	A0A9R0D7Q9;A0A9R0DMN7;A0A9R0D7S5;A0A9R0DMT8;A0A9R0DM73;A0A9R0DNA6	9;9;9;8;8;8;4;4	9;9;9;8;8;8;4;4	9;9;9;8;8;8;4;4			tr|A0A9R0D7Q9|A0A9R0D7Q9_SPOFR Ubiquitin carboxyl-terminal hydrolase OS=Spodoptera frugiperda OX=7108 GN=LOC118271677 PE=3 SV=1;tr|A0A9R0DMN7|A0A9R0DMN7_SPOFR Ubiquitin carboxyl-terminal hydrolase OS=Spodoptera frugiperda OX=7108 GN=LOC118271677 PE=3 SV=1;	8	9	9	9	9	9	9	11.7	11.7	11.7	105.52	961	961;992;993;964;995;996;375;650	0	11.849	11.7	57255000	57255000	1080300	1080300	9				536	142;549;1664;1829;2059;2574;4965;5074;5251	True;True;True;True;True;True;True;True;True	145;557;1687;1854;2086;2609;5045;5156;5334	181;690;2123;2320;2591;3251;6421;6555;6773	252;1028;3231;3532;3928;4975;9805;10009;10349	252;1028;3231;3532;3928;4975;9805;10009;10349
A0A9R0D7R0;A0A9R0EMA8;A0A9R0ELC6;A0A9R0D7N3;A0A2H1WHC5;A0A2H1X0F6;A0A2H1WYY2;A0A2H1W687	A0A9R0D7R0;A0A9R0EMA8;A0A9R0ELC6;A0A9R0D7N3	18;17;17;17;5;5;3;1	18;17;17;17;5;5;3;1	18;17;17;17;5;5;3;1			tr|A0A9R0D7R0|A0A9R0D7R0_SPOFR GMP synthase (glutamine-hydrolyzing) OS=Spodoptera frugiperda OX=7108 GN=LOC118271647 PE=4 SV=1;tr|A0A9R0EMA8|A0A9R0EMA8_SPOFR GMP synthase (glutamine-hydrolyzing) OS=Spodoptera frugiperda OX=7108 GN=LOC118271647 PE=4 SV=1;tr	8	18	18	18	18	18	18	33.5	33.5	33.5	76.022	687	687;701;704;709;135;226;157;100	0	44.555	33.5	275920000	275920000	6271000	6271000	21				537	248;298;1303;2210;2262;2345;2386;3631;3722;4328;4417;4788;4896;5029;5308;5333;5508;5850	True;True;True;True;True;True;True;True;True;True;True;True;True;True;True;True;True;True	252;302;1324;2238;2291;2376;2417;3680;3772;4397;4488;4864;4976;5111;5391;5416;5595;5943	325;381;1693;2794;2868;2972;3019;4642;4752;5592;5700;6186;6330;6502;6840;6867;7095;7505	476;551;2600;4282;4425;4570;4648;7098;7099;7100;7244;8475;8476;8622;9426;9663;9926;10448;10486;10840;11430	476;551;2600;4282;4425;4570;4648;7100;7244;8476;8622;9426;9663;9926;10448;10486;10840;11430
J9Z496;A0A9R0D7S0;A0A2H1W696;A0A2H1W8R3;A0A9R0DCM2;A0A2H1VFZ6	J9Z496;A0A9R0D7S0;A0A2H1W696	9;9;8;1;1;1	9;9;8;1;1;1	9;9;8;1;1;1			tr|J9Z496|J9Z496_SPOFR Serine/threonine-protein phosphatase OS=Spodoptera frugiperda OX=7108 PE=2 SV=1;tr|A0A9R0D7S0|A0A9R0D7S0_SPOFR Serine/threonine-protein phosphatase OS=Spodoptera frugiperda OX=7108 GN=LOC118271583 PE=3 SV=1;tr|A0A2H1W696|A0A2H1W696_S	6	9	9	9	9	9	9	37.2	37.2	37.2	35.466	309	309;309;450;60;307;311	0	80.866	37.2	346750000	346750000	21672000	21672000	22				538	206;642;1324;1792;3435;4280;4321;4769;5987	True;True;True;True;True;True;True;True;True	210;650;1345;1816;3480;4349;4390;4845;6083	273;274;806;1717;2277;4365;5488;5582;6165;7703	408;409;1201;1202;1203;1204;2632;2633;2634;3460;3461;6665;6666;6667;6668;8292;8293;8461;8462;8463;9391;11748	408;1203;2634;3461;6666;8292;8463;9391;11748
A0A9R0ELX8;A0A9R0D802;A0A2H1WW45	A0A9R0ELX8;A0A9R0D802;A0A2H1WW45	10;10;5	10;10;5	10;10;5			tr|A0A9R0ELX8|A0A9R0ELX8_SPOFR 2-hydroxyacyl-CoA lyase OS=Spodoptera frugiperda OX=7108 GN=LOC118271809 PE=3 SV=1;tr|A0A9R0D802|A0A9R0D802_SPOFR 2-hydroxyacyl-CoA lyase OS=Spodoptera frugiperda OX=7108 GN=LOC118271809 PE=3 SV=1;tr|A0A2H1WW45|A0A2H1WW45_SPO	3	10	10	10	10	10	10	20.1	20.1	20.1	64.414	593	593;569;380	0	36.632	20.1	114790000	114790000	3587100	3587100	15				539	108;117;269;402;1609;1883;3369;3384;5105;5221	True;True;True;True;True;True;True;True;True;True	111;120;273;409;1630;1908;3412;3427;5187;5304	141;152;349;509;2058;2377;4293;4309;6589;6733;6734	203;216;508;509;741;3131;3132;3613;3614;6566;6589;6590;10052;10274;10275	203;216;509;741;3131;3613;6566;6590;10052;10275
A0A9R0D861;A0A2H1VLS3;A0A2H1W8N6	A0A9R0D861;A0A2H1VLS3	5;3;2	5;3;2	5;3;2			tr|A0A9R0D861|A0A9R0D861_SPOFR F-actin-capping protein subunit beta OS=Spodoptera frugiperda OX=7108 GN=LOC118271916 PE=3 SV=1;tr|A0A2H1VLS3|A0A2H1VLS3_SPOFR F-actin-capping protein subunit beta (Fragment) OS=Spodoptera frugiperda OX=7108 GN=SFRICE_015639	3	5	5	5	5	5	5	25.1	25.1	25.1	31.245	275	275;79;199	0	30.319	25.1	99442000	99442000	5849600	5849600	4				540	2780;3829;3990;4899;5300	True;True;True;True;True	2817;3886;4049;4979;5383	3509;4932;5121;5122;6334;6831	5382;7521;7785;7786;9668;10437	5382;7521;7786;9668;10437
A0A9R0D922;A0A2H1VJE8;A0A2H1VMP1	A0A9R0D922;A0A2H1VJE8	4;3;1	4;3;1	4;3;1			tr|A0A9R0D922|A0A9R0D922_SPOFR Alanine--glyoxylate aminotransferase 2, mitochondrial OS=Spodoptera frugiperda OX=7108 GN=LOC118272558 PE=3 SV=1;tr|A0A2H1VJE8|A0A2H1VJE8_SPOFR SFRICE_023310 (Fragment) OS=Spodoptera frugiperda OX=7108 GN=SFRICE_023310 PE=3 S	3	4	4	4	4	4	4	8.2	8.2	8.2	95.776	861	861;654;197	0	2.3856	8.2	28927000	28927000	628860	628860	5				541	386;1112;3356;5184	True;True;True;True	393;1129;3399;5267	490;1407;4280;6686	713;2129;6551;10209;10210	713;2129;6551;10210
A0A9R0D9E8;A0A9R0D9C1;A0A9R0D9F8;A0A2H1VWE7	A0A9R0D9E8;A0A9R0D9C1;A0A9R0D9F8;A0A2H1VWE7	9;9;9;5	9;9;9;5	9;9;9;5			tr|A0A9R0D9E8|A0A9R0D9E8_SPOFR Nucleoprotein TPR OS=Spodoptera frugiperda OX=7108 GN=LOC118272707 PE=3 SV=1;tr|A0A9R0D9C1|A0A9R0D9C1_SPOFR Nucleoprotein TPR OS=Spodoptera frugiperda OX=7108 GN=LOC118272707 PE=3 SV=1;tr|A0A9R0D9F8|A0A9R0D9F8_SPOFR Nucleopro	4	9	9	9	9	9	9	4.8	4.8	4.8	250.09	2242	2242;2243;2244;1788	0	22.455	4.8	142560000	142560000	1218400	1218400	9				542	998;3203;3280;3447;3556;4463;4892;4902;5602	True;True;True;True;True;True;True;True;True	1015;3245;3322;3492;3604;4535;4972;4982;5690	1269;4043;4148;4377;4508;5765;6326;6338;7202	1912;6156;6319;6684;6870;8728;9658;9672;10986	1912;6156;6319;6684;6870;8728;9658;9672;10986
A0A9R0D9E2	A0A9R0D9E2	1	1	1			tr|A0A9R0D9E2|A0A9R0D9E2_SPOFR Uncharacterized protein LOC118272768 OS=Spodoptera frugiperda OX=7108 GN=LOC118272768 PE=4 SV=1	1	1	1	1	1	1	1	3.6	3.6	3.6	29.258	252	252	0.0014641	1.6019	3.6	252420000	252420000	21035000	21035000	1				543	4677	TRUE	4752	6051	9226	9226
A0A9R0D9R2	A0A9R0D9R2	1	1	1			tr|A0A9R0D9R2|A0A9R0D9R2_SPOFR Small nuclear ribonucleoprotein E OS=Spodoptera frugiperda OX=7108 GN=LOC118272761 PE=3 SV=1	1	1	1	1	1	1	1	11.6	11.6	11.6	11.115	95	95	0	2.5358	11.6	5464400	5464400	1366100	1366100	2				544	5596	TRUE	5684	7195	10977;10978	10978
A0A9R0DA94;A0A2H1VDL3	A0A9R0DA94;A0A2H1VDL3	5;4	5;4	5;4			tr|A0A9R0DA94|A0A9R0DA94_SPOFR PITH domain-containing protein CG6153 OS=Spodoptera frugiperda OX=7108 GN=LOC118273217 PE=3 SV=1;tr|A0A2H1VDL3|A0A2H1VDL3_SPOFR SFRICE_016577 OS=Spodoptera frugiperda OX=7108 GN=SFRICE_016577 PE=3 SV=1	2	5	5	5	5	5	5	41.3	41.3	41.3	23.744	206	206;206	0	13.463	41.3	118680000	118680000	9889700	9889700	10				545	923;1749;2118;3001;3955	True;True;True;True;True	934;1773;2145;3039;4014	1147;2226;2672;3793;5078	1709;1710;3374;4048;5795;5796;5797;7721;7722;7723	1709;3374;4048;5797;7722
A0A9R0DAA4;A0A9R0EML8;A0A2H1WVN8	A0A9R0DAA4;A0A9R0EML8	33;33;10	33;33;10	33;33;10			tr|A0A9R0DAA4|A0A9R0DAA4_SPOFR Cullin-3 isoform X1 OS=Spodoptera frugiperda OX=7108 GN=LOC118273232 PE=3 SV=1;tr|A0A9R0EML8|A0A9R0EML8_SPOFR Cullin-3 isoform X2 OS=Spodoptera frugiperda OX=7108 GN=LOC118273232 PE=3 SV=1	3	33	33	33	33	33	33	49.1	49.1	49.1	88.429	760	760;758;224	0	99.278	49.1	870810000	870810000	19351000	19351000	37				546	343;359;595;669;802;1135;1396;1526;1552;1884;2239;2247;2302;2753;3211;3560;3651;3848;3851;3855;3856;4020;4316;4369;4440;4771;4972;5088;5209;5566;5726;5803;6012	True;True;True;True;True;True;True;True;True;True;True;True;True;True;True;True;True;True;True;True;True;True;True;True;True;True;True;True;True;True;True;True;True	348;365;603;677;812;1152;1417;1547;1573;1909;2268;2276;2332;2790;3253;3608;3700;3907;3910;3914;3915;4082;4385;4440;4512;4847;5052;5170;5292;5653;5816;5893;6108	436;457;742;743;841;997;1436;1810;1963;1996;2378;2841;2842;2850;2917;3472;4055;4513;4667;4957;4960;4964;4965;5163;5571;5643;5729;6167;6428;6570;6719;7160;7354;7355;7446;7734	636;673;1102;1103;1250;1496;2184;2783;3014;3052;3615;3616;4381;4382;4401;4488;4489;5309;6179;6875;7139;7564;7574;7578;7579;7841;7842;8443;8540;8657;9393;9813;10028;10256;10933;11218;11219;11340;11791	636;673;1102;1250;1496;2184;2783;3014;3052;3616;4381;4401;4489;5309;6179;6875;7139;7564;7574;7578;7579;7842;8443;8540;8657;9393;9813;10028;10256;10933;11219;11340;11791
A0A9R0DBH1;A0A9R0DB86;A0A2H1W4B2	A0A9R0DBH1;A0A9R0DB86	7;7;1	1;1;1	1;1;1			tr|A0A9R0DBH1|A0A9R0DBH1_SPOFR Isocitrate dehydrogenase [NAD] subunit, mitochondrial OS=Spodoptera frugiperda OX=7108 GN=LOC118273801 PE=3 SV=1;tr|A0A9R0DB86|A0A9R0DB86_SPOFR Isocitrate dehydrogenase [NAD] subunit, mitochondrial OS=Spodoptera frugiperda OX	3	7	1	1	7	1	1	26.5	4.4	4.4	42.172	388	388;354;82	0.0029112	1.5359	26.5	114380	114380	4972.9	4972.9	1				547	221;868;1263;3198;5121;5640;5706	False;True;False;False;False;False;False	225;878;1284;3240;5204;5728;5795	293;1080;1641;4037;6606;7245;7333	439;1616;2505;6146;10079;11040;11188	439;1616;2505;6146;10079;11040;11188
A0A9R0DBA9;A0A2H1WZ85;A0A2H1W7B6	A0A9R0DBA9;A0A2H1WZ85	7;4;2	7;4;2	7;4;2			tr|A0A9R0DBA9|A0A9R0DBA9_SPOFR Histone deacetylase OS=Spodoptera frugiperda OX=7108 GN=LOC118273826 PE=3 SV=1;tr|A0A2H1WZ85|A0A2H1WZ85_SPOFR histone deacetylase OS=Spodoptera frugiperda OX=7108 GN=SFRICE_022836 PE=3 SV=1	3	7	7	7	7	7	7	20.2	20.2	20.2	55.251	485	485;302;183	0	20.772	20.2	110970000	110970000	5284200	5284200	11				548	1486;1498;2799;3140;3820;3949;5584	True;True;True;True;True;True;True	1507;1519;2836;3181;3876;4008;5671	1915;1932;3531;3532;3533;3534;3964;4921;5072;7180;7181	2955;2977;5414;5415;5416;5417;6053;7507;7714;7715;10958;10959	2955;2977;5415;6053;7507;7715;10958
A0A9R0DBG2;A0A2H1W4Y2;A0A2H1VZ23	A0A9R0DBG2;A0A2H1W4Y2	10;6;3	10;6;3	10;6;3			tr|A0A9R0DBG2|A0A9R0DBG2_SPOFR Glutamine synthetase OS=Spodoptera frugiperda OX=7108 GN=LOC118273974 PE=3 SV=1;tr|A0A2H1W4Y2|A0A2H1W4Y2_SPOFR SFRICE_008552 (Fragment) OS=Spodoptera frugiperda OX=7108 GN=SFRICE_008552 PE=3 SV=1	3	10	10	10	10	10	10	37.4	37.4	37.4	42.983	382	382;155;252	0	60.174	37.4	432270000	432270000	25428000	25428000	11				549	848;1894;2424;2466;3540;3804;4429;4468;5947;5957	True;True;True;True;True;True;True;True;True;True	858;1919;2457;2499;3588;3859;4501;4540;6043;6053	1055;2390;2391;3066;3115;4491;4903;5715;5771;7626;7640	1579;3632;3633;4713;4777;6845;7485;8639;8737;11613;11627	1579;3633;4713;4777;6845;7485;8639;8737;11613;11627
I7FV58;A0A9R0EC35;A0A9R0F761;A0A9R0DC54;A0A9R0EEI1;A0A9R0EE61;A0A9R0F7J8;A0A9R0F557;A0A9R0ECR4;A0A9R0EDM9;A0A9R0ECX6;A0A9R0ECA5;A0A9R0F602;A0A9R0EDS4;A0A9R0EQG3;P68203;A0A9R0DC85;Q962S3;A0A9R0F4V8	I7FV58;A0A9R0EC35;A0A9R0F761;A0A9R0DC54;A0A9R0EEI1;A0A9R0EE61;A0A9R0F7J8;A0A9R0F557;A0A9R0ECR4;A0A9R0EDM9;A0A9R0ECX6;A0A9R0ECA5;A0A9R0F602;A0A9R0EDS4;A0A9R0EQG3;P68203;A0A9R0DC85;Q962S3;A0A9R0F4V8	2;2;2;2;2;2;2;2;2;2;2;2;2;2;2;2;2;1;1	2;2;2;2;2;2;2;2;2;2;2;2;2;2;2;2;2;1;1	2;2;2;2;2;2;2;2;2;2;2;2;2;2;2;2;2;1;1			tr|I7FV58|I7FV58_SPOFR Ubiquitin OS=Spodoptera frugiperda OX=7108 PE=2 SV=1;tr|A0A9R0EC35|A0A9R0EC35_SPOFR Polyubiquitin-C isoform X16 OS=Spodoptera frugiperda OX=7108 GN=LOC118274278 PE=4 SV=1;tr|A0A9R0F761|A0A9R0F761_SPOFR Polyubiquitin-C isoform X2 OS=S	19	2	2	2	2	2	2	32.9	32.9	32.9	8.5647	76	76;837;1217;1141;1141;1065;1065;989;913;761;685;609;533;457;156;156;1293;129;212	0	21.719	32.9	140110000	140110000	35029000	35029000	3				550	5065;5109	True;True	5147;5191	6543;6544;6593	9993;9994;10057	9993;10057
A0A9R0DCQ1	A0A9R0DCQ1	2	2	2			tr|A0A9R0DCQ1|A0A9R0DCQ1_SPOFR Small nuclear ribonucleoprotein Sm D3 OS=Spodoptera frugiperda OX=7108 GN=LOC118274735 PE=3 SV=1	1	2	2	2	2	2	2	23.1	23.1	23.1	14.047	130	130	0	8.8372	23.1	52624000	52624000	8770700	8770700	3				551	1543;5531	True;True	1564;5618	1985;7119	3040;10870;10871	3040;10871
A0A9R0DDC7;A0A2H1VNK6;A0A2H1VJ90	A0A9R0DDC7;A0A2H1VNK6	3;2;1	3;2;1	3;2;1			tr|A0A9R0DDC7|A0A9R0DDC7_SPOFR Ribosome quality control complex subunit NEMF homolog OS=Spodoptera frugiperda OX=7108 GN=LOC118275399 PE=3 SV=1;tr|A0A2H1VNK6|A0A2H1VNK6_SPOFR SFRICE_018201 (Fragment) OS=Spodoptera frugiperda OX=7108 GN=SFRICE_018201 PE=4 S	3	3	3	3	3	3	3	4.6	4.6	4.6	112.42	990	990;739;329	0	3.9402	4.6	6358400	6358400	141300	141300	3				552	547;5064;5190	True;True;True	555;5146;5273	688;6542;6693	1026;9992;10218	1026;9992;10218
A0A9R0DQI3;A0A9R0DQA4;A0A9R0DPM1;A0A9R0DDS6	A0A9R0DQI3;A0A9R0DQA4;A0A9R0DPM1;A0A9R0DDS6	1;1;1;1	1;1;1;1	1;1;1;1			tr|A0A9R0DQI3|A0A9R0DQI3_SPOFR RNA-binding protein Pasilla isoform X4 OS=Spodoptera frugiperda OX=7108 GN=LOC118275373 PE=4 SV=1;tr|A0A9R0DQA4|A0A9R0DQA4_SPOFR RNA-binding protein Pasilla isoform X3 OS=Spodoptera frugiperda OX=7108 GN=LOC118275373 PE=4 SV=	4	1	1	1	1	1	1	2.7	2.7	2.7	54.218	527	527;528;546;549	0.0056899	1.3733	2.7	1933200	1933200	96659	96659	1				553	5573	TRUE	5660	7168	10942	10942
A0A9R0DEC3;A0A2H1VC83;A0A2H1VWU1	A0A9R0DEC3;A0A2H1VC83;A0A2H1VWU1	2;1;1	2;1;1	2;1;1			tr|A0A9R0DEC3|A0A9R0DEC3_SPOFR Probable ATP-dependent RNA helicase spindle-E OS=Spodoptera frugiperda OX=7108 GN=LOC118275626 PE=3 SV=1;tr|A0A2H1VC83|A0A2H1VC83_SPOFR SFRICE_037473 (Fragment) OS=Spodoptera frugiperda OX=7108 GN=SFRICE_037473 PE=4 SV=1;tr|A	3	2	2	2	2	2	2	1.7	1.7	1.7	162.99	1441	1441;120;198	0	3.3988	1.7	24869000	24869000	307030	307030	2				554	1471;3613	True;True	1492;3662	1900;4623	2935;7069	2935;7069
A0A9R0DEC7;A0A2H1WUL6	A0A9R0DEC7;A0A2H1WUL6	5;4	5;4	5;4			tr|A0A9R0DEC7|A0A9R0DEC7_SPOFR Bifunctional UDP-N-acetylglucosamine transferase and deubiquitinase ALG13 OS=Spodoptera frugiperda OX=7108 GN=LOC118276075 PE=4 SV=1;tr|A0A2H1WUL6|A0A2H1WUL6_SPOFR SFRICE_003366 OS=Spodoptera frugiperda OX=7108 GN=SFRICE_0033	2	5	5	5	5	5	5	13.4	13.4	13.4	96.063	861	861;858	0	50.523	13.4	1315000000	1315000000	36527000	36527000	44				555	1168;1673;2137;4743;4912	True;True;True;True;True	1186;1696;2164;4819;4992	1476;1477;2132;2133;2699;2700;2701;6133;6134;6135;6351	2241;2242;3246;3247;4084;4085;4086;4087;4088;4089;4090;4091;4092;4093;4094;4095;4096;4097;4098;4099;4100;4101;4102;4103;4104;4105;4106;4107;4108;4109;4110;9337;9338;9339;9340;9341;9342;9343;9344;9345;9346;9347;9348;9699	2242;3246;4091;9343;9699
A0A9R0DFV7;A0A2H1WBT4;A0A9R0EVY6;A0A9R0F2N0;A0A2H1VXQ4;Q8ISR0	A0A9R0DFV7;A0A2H1WBT4;A0A9R0EVY6	16;15;14;5;5;1	6;5;4;0;0;0	6;5;4;0;0;0			tr|A0A9R0DFV7|A0A9R0DFV7_SPOFR Tubulin beta chain OS=Spodoptera frugiperda OX=7108 GN=LOC118277206 PE=3 SV=1;tr|A0A2H1WBT4|A0A2H1WBT4_SPOFR Tubulin beta chain OS=Spodoptera frugiperda OX=7108 GN=SFRICE_010207 PE=3 SV=1;tr|A0A9R0EVY6|A0A9R0EVY6_SPOFR Tubuli	6	16	6	6	16	6	6	44.6	24.9	24.9	51.337	457	457;457;379;460;460;56	0	214.47	44.6	894990000	894990000	42619000	42619000	12				557	229;354;1152;1581;1582;2484;2572;2775;2951;3139;3814;4004;4057;4602;5644;5941	True;False;True;False;False;False;False;False;False;False;True;False;True;True;True;False	233;359;360;1170;1602;1603;2517;2518;2607;2812;2988;2989;3179;3180;3870;4063;4064;4121;4677;5732;6036	302;448;449;450;1457;1458;2028;2029;2030;3136;3137;3247;3248;3249;3502;3503;3733;3734;3962;3963;4914;5140;5141;5142;5143;5206;5964;7249;7619	448;653;654;655;656;657;658;659;660;661;662;2212;2213;2214;2215;2216;3093;3094;3095;3096;3097;4802;4803;4804;4805;4966;4967;4968;4969;4970;4971;4972;4973;5375;5376;5704;5705;6048;6049;6050;6051;6052;7499;7810;7811;7812;7813;7814;7815;7896;7897;9098;11045;11046;11603;11604	448;656;2216;3093;3095;4805;4966;5376;5704;6050;7499;7815;7896;9098;11046;11604	38;57;58;59;60;61	170;263;273;299;305;306
A0A9R0DG00;A0A9R0DG44;A0A9R0EWT9;A0A9R0DRS0;A0A2H1WYA3;A0A2H1WM97	A0A9R0DG00;A0A9R0DG44;A0A9R0EWT9;A0A9R0DRS0;A0A2H1WYA3	11;11;10;10;8;1	11;11;10;10;8;1	11;11;10;10;8;1			tr|A0A9R0DG00|A0A9R0DG00_SPOFR Vacuolar protein sorting-associated protein 35 OS=Spodoptera frugiperda OX=7108 GN=LOC118277349 PE=3 SV=1;tr|A0A9R0DG44|A0A9R0DG44_SPOFR Vacuolar protein sorting-associated protein 35 OS=Spodoptera frugiperda OX=7108 GN=LOC11	6	11	11	11	11	11	11	15.7	15.7	15.7	91.868	807	807;823;742;742;631;113	0	26.348	15.7	191990000	191990000	3999700	3999700	13				558	333;709;860;2064;2093;2271;3225;3588;4094;4544;5033	True;True;True;True;True;True;True;True;True;True;True	337;718;870;2091;2120;2300;3267;3637;4158;4617;5115	423;891;1070;2597;2635;2878;2879;4071;4597;5245;5864;6506	613;1319;1603;3935;3993;4436;4437;4438;6201;7038;7960;8869;9931;9932	613;1319;1603;3935;3993;4437;6201;7038;7960;8869;9932
A0A9R0DG24;A0A2H1VDA5	A0A9R0DG24;A0A2H1VDA5	5;4	5;4	5;4			tr|A0A9R0DG24|A0A9R0DG24_SPOFR Elongin-C OS=Spodoptera frugiperda OX=7108 GN=LOC118277301 PE=3 SV=1;tr|A0A2H1VDA5|A0A2H1VDA5_SPOFR Elongin-C (Fragment) OS=Spodoptera frugiperda OX=7108 GN=SFRICE_011445 PE=3 SV=1	2	5	5	5	5	5	5	43.6	43.6	43.6	16.431	156	156;122	0	87.042	43.6	306260000	306260000	34029000	34029000	16				559	374;1119;3196;4418;4531	True;True;True;True;True	381;1136;3238;4489;4604	475;476;1416;4032;4033;5701;5702;5849;5850	692;693;694;695;696;2146;2147;2148;2149;6139;6140;6141;8623;8624;8849;8850	692;2149;6140;8623;8849
A0A9R0DG33;A0A2H1WYZ1;A0A2H1WFD3;A0A2H1VRL4;A0A2H1WFD2;A0A2H1V2K2	A0A9R0DG33;A0A2H1WYZ1;A0A2H1WFD3;A0A2H1VRL4	22;14;14;12;6;5	22;14;14;12;6;5	2;2;0;0;0;0			tr|A0A9R0DG33|A0A9R0DG33_SPOFR Tubulin beta chain OS=Spodoptera frugiperda OX=7108 GN=LOC126910589 PE=3 SV=1;tr|A0A2H1WYZ1|A0A2H1WYZ1_SPOFR Tubulin beta chain (Fragment) OS=Spodoptera frugiperda OX=7108 GN=SFRICE_023432 PE=3 SV=1;tr|A0A2H1WFD3|A0A2H1WFD3_S	6	22	22	2	22	22	2	66.7	66.7	7.4	50.214	447	447;288;443;447;449;446	0	323.31	66.7	4877400000	4877400000	243870000	243870000	97				560	232;354;1001;1361;1581;1582;1657;1809;2484;2504;2572;2708;2775;2951;3139;3522;3646;4004;4058;4621;4951;5941	True;True;True;True;True;True;True;True;True;True;True;True;True;True;True;True;True;True;True;True;True;True	236;359;360;1018;1382;1602;1603;1680;1833;2517;2518;2538;2607;2744;2812;2988;2989;3179;3180;3570;3695;4063;4064;4122;4696;5031;6036	306;307;448;449;450;1272;1765;2028;2029;2030;2114;2115;2116;2295;2296;3136;3137;3161;3247;3248;3249;3415;3416;3502;3503;3733;3734;3962;3963;4471;4660;4661;4662;5140;5141;5142;5143;5207;5984;5985;6400;6401;6402;7619	453;454;455;653;654;655;656;657;658;659;660;661;662;1915;2709;3093;3094;3095;3096;3097;3212;3213;3214;3215;3216;3217;3218;3219;3496;3497;3498;3499;3500;3501;4802;4803;4804;4805;4841;4842;4966;4967;4968;4969;4970;4971;4972;4973;5222;5223;5224;5375;5376;5704;5705;6048;6049;6050;6051;6052;6817;6818;6819;7126;7127;7128;7129;7130;7131;7132;7810;7811;7812;7813;7814;7815;7898;7899;7900;7901;9127;9128;91…	453;656;1915;2709;3093;3095;3215;3500;4805;4841;4966;5223;5376;5704;6050;6818;7127;7815;7901;9132;9776;11604	38;57;58;59;60;61	164;257;267;293;299;300
A0A9R0DGE8;A0A9R0EWR4;A0A2H1VFW9	A0A9R0DGE8;A0A9R0EWR4;A0A2H1VFW9	17;17;16	17;17;16	17;17;16			tr|A0A9R0DGE8|A0A9R0DGE8_SPOFR non-specific serine/threonine protein kinase OS=Spodoptera frugiperda OX=7108 GN=LOC118277362 PE=4 SV=1;tr|A0A9R0EWR4|A0A9R0EWR4_SPOFR non-specific serine/threonine protein kinase OS=Spodoptera frugiperda OX=7108 GN=LOC118277	3	17	17	17	17	17	17	21.5	21.5	21.5	148.18	1328	1328;1364;1364	0	47.343	21.5	346030000	346030000	5164600	5164600	18				561	89;356;532;558;573;1215;1533;2270;2377;2543;2964;3193;3587;4506;4600;4770;5741	True;True;True;True;True;True;True;True;True;True;True;True;True;True;True;True;True	91;362;539;566;581;1234;1554;2299;2408;2577;3002;3235;3636;4579;4675;4846;5831	107;452;669;699;717;1573;1971;2877;3009;3209;3751;4029;4596;5820;5962;6166;7370	145;146;664;1000;1041;1070;2389;3023;4435;4637;4638;4923;5732;6136;7037;8808;9096;9392;11238	146;664;1000;1041;1070;2389;3023;4435;4637;4923;5732;6136;7037;8808;9096;9392;11238
A0A9R0DHG6;A0A2H1VV66;A0A2H1X3H6	A0A9R0DHG6;A0A2H1VV66	8;6;1	8;6;1	8;6;1			tr|A0A9R0DHG6|A0A9R0DHG6_SPOFR EH domain-containing protein 3 OS=Spodoptera frugiperda OX=7108 GN=LOC118278304 PE=4 SV=1;tr|A0A2H1VV66|A0A2H1VV66_SPOFR SFRICE_032581 OS=Spodoptera frugiperda OX=7108 GN=SFRICE_032581 PE=4 SV=1	3	8	8	8	8	8	8	20.7	20.7	20.7	60.802	532	532;446;123	0	21.828	20.7	34642000	34642000	1082600	1082600	9				562	1589;1773;1826;3040;3316;5559;5792;5849	True;True;True;True;True;True;True;True	1610;1797;1851;3079;3358;5646;5882;5942	2038;2257;2316;3840;4192;7153;7434;7504	3106;3433;3434;3526;3527;5862;6375;10925;11316;11429	3106;3433;3526;5862;6375;10925;11316;11429
A0A9R0ERH7;A0A9R0DHL2	A0A9R0ERH7;A0A9R0DHL2	11;11	11;11	1;1			tr|A0A9R0ERH7|A0A9R0ERH7_SPOFR Src substrate cortactin isoform X2 OS=Spodoptera frugiperda OX=7108 GN=LOC118278106 PE=4 SV=1;tr|A0A9R0DHL2|A0A9R0DHL2_SPOFR Src substrate cortactin isoform X1 OS=Spodoptera frugiperda OX=7108 GN=LOC118278106 PE=4 SV=1	2	11	11	1	11	11	1	28.5	28.5	6.1	58.191	527	527;528	0	39.488	28.5	141860000	141860000	4891600	4891600	17				563	62;979;988;1492;1701;2229;3459;4393;4517;4538;5889	True;True;True;True;True;True;True;True;True;True;True	64;995;1005;1513;1725;2258;3504;4464;4590;4611;5982	77;1248;1259;1923;2170;2826;2827;2828;4389;5673;5831;5857;5858;7552	108;1872;1887;2963;3294;4350;4351;4352;6697;8579;8825;8826;8861;8862;8863;11503;11504;11505;11506	108;1872;1887;2963;3294;4351;6697;8579;8826;8861;11505
A0A9R0DHT9;A0A9R0ESI7;A0A2H1V357;A0A2H1W030	A0A9R0DHT9;A0A9R0ESI7;A0A2H1V357	26;26;21;4	26;26;21;4	26;26;21;4			tr|A0A9R0DHT9|A0A9R0DHT9_SPOFR SWI/SNF complex subunit SMARCC2 isoform X2 OS=Spodoptera frugiperda OX=7108 GN=LOC118278285 PE=4 SV=1;tr|A0A9R0ESI7|A0A9R0ESI7_SPOFR SWI/SNF complex subunit SMARCC2 isoform X1 OS=Spodoptera frugiperda OX=7108 GN=LOC118278285	4	26	26	26	26	26	26	37.4	37.4	37.4	104.17	954	954;957;826;79	0	150.8	37.4	671200000	671200000	14591000	14591000	45				564	42;137;329;599;770;884;1101;2090;2144;2701;3449;3868;3911;3961;4345;4680;4731;4766;4971;5021;5145;5168;5369;5390;5436;5493	True;True;True;True;True;True;True;True;True;True;True;True;True;True;True;True;True;True;True;True;True;True;True;True;True;True	42;140;333;607;779;894;1118;2117;2171;2737;3494;3927;3970;4020;4416;4755;4806;4842;5051;5103;5228;5251;5453;5475;5523;5580	50;176;418;749;962;1102;1394;2630;2709;3408;4379;4978;5030;5087;5616;6055;6056;6119;6161;6162;6427;6493;6633;6659;6660;6926;6952;7004;7074	65;66;246;608;1112;1446;1644;2113;3987;4121;4122;4123;4124;4125;4126;4127;4128;4129;5211;5212;5213;6686;7597;7656;7737;8505;9236;9237;9238;9239;9317;9387;9388;9812;9917;10117;10148;10149;10150;10595;10627;10628;10629;10695;10696;10808;10809	66;246;608;1112;1446;1644;2113;3987;4125;5211;6686;7597;7656;7737;8505;9237;9317;9387;9812;9917;10117;10148;10595;10628;10695;10809
A0A9R0DHW5	A0A9R0DHW5	3	3	3			tr|A0A9R0DHW5|A0A9R0DHW5_SPOFR Histone H2B OS=Spodoptera frugiperda OX=7108 GN=LOC118278906 PE=3 SV=1	1	3	3	3	3	3	3	25	25	25	13.809	124	124	0	43.522	25	88378000	88378000	12625000	12625000	4				565	378;1388;3273	True;True;True	385;1409;3315	480;1799;4124	700;2762;2763;6271	700;2762;6271
A0A9R0DI73;A0A2H1VKX0	A0A9R0DI73;A0A2H1VKX0	2;1	2;1	2;1			tr|A0A9R0DI73|A0A9R0DI73_SPOFR Histone H2A OS=Spodoptera frugiperda OX=7108 GN=LOC118278899 PE=3 SV=1;tr|A0A2H1VKX0|A0A2H1VKX0_SPOFR Histone H2A OS=Spodoptera frugiperda OX=7108 GN=LOC118270043 PE=3 SV=1	2	2	2	2	2	2	2	24.2	24.2	24.2	13.348	124	124;129	0	15.948	24.2	139630000	139630000	23271000	23271000	3				566	2157;3294	True;True	2184;3336	2725;4163	4166;6339;6340	4166;6339
A0A9R0DIN4;A0A2H1WGP6;A0A2H1V5M8	A0A9R0DIN4;A0A2H1WGP6	9;5;2	9;5;2	9;5;2			tr|A0A9R0DIN4|A0A9R0DIN4_SPOFR PC4 and SFRS1-interacting protein OS=Spodoptera frugiperda OX=7108 GN=LOC118279795 PE=3 SV=1;tr|A0A2H1WGP6|A0A2H1WGP6_SPOFR SFRICE_034531 (Fragment) OS=Spodoptera frugiperda OX=7108 GN=SFRICE_034531 PE=4 SV=1	3	9	9	9	9	9	9	12.1	12.1	12.1	82.205	727	727;330;163	0	17.98	12.1	117840000	117840000	4063400	4063400	18				567	828;1030;1351;1406;2043;2184;2185;3727;4941	True;True;True;True;True;True;True;True;True	838;1047;1372;1427;2069;2211;2212;3777;5021	1027;1306;1747;1748;1821;2574;2757;2758;4757;6388	1537;1538;1966;2686;2687;2688;2689;2797;3898;4222;4223;4224;4225;4226;4227;4228;7250;7251;9761	1537;1966;2688;2797;3898;4222;4225;7251;9761
A0A9R0DJ47;A0A2H1WFU0;A0A2H1VYZ7	A0A9R0DJ47;A0A2H1WFU0;A0A2H1VYZ7	2;1;1	2;1;1	2;1;1			tr|A0A9R0DJ47|A0A9R0DJ47_SPOFR Isocitrate dehydrogenase [NAD] subunit gamma, mitochondrial OS=Spodoptera frugiperda OX=7108 GN=LOC118280357 PE=3 SV=1;tr|A0A2H1WFU0|A0A2H1WFU0_SPOFR SFRICE_026187 OS=Spodoptera frugiperda OX=7108 GN=SFRICE_026187 PE=3 SV=1;t	3	2	2	2	2	2	2	5.8	5.8	5.8	43.619	396	396;219;233	0.0056818	1.3725	5.8	28340000	28340000	1771300	1771300	1				568	4115;4563	True;True	4182;4637	5274;5886	8006;8898	8006;8898
A0A9R0DJP9;A0A2H1VRI6;A0A9R0DJN8	A0A9R0DJP9;A0A2H1VRI6;A0A9R0DJN8	2;1;1	2;1;1	2;1;1			tr|A0A9R0DJP9|A0A9R0DJP9_SPOFR U1 small nuclear ribonucleoprotein 70 kDa OS=Spodoptera frugiperda OX=7108 GN=LOC118280838 PE=4 SV=1;tr|A0A2H1VRI6|A0A2H1VRI6_SPOFR U1 small nuclear ribonucleoprotein 70 kDa OS=Spodoptera frugiperda OX=7108 GN=SFRICE_021288 P	3	2	2	2	2	2	2	12.1	12.1	12.1	44.677	373	373;162;387	0	5.0014	12.1	6979900	6979900	387770	387770	2				569	2033;2416	True;True	2059;2448	2561;3056	3876;4703	3876;4703
A0A9R0EYW8;A0A9R0DYA8;A0A9R0F005;A0A9R0DXN7;A0A9R0DXP4;A0A9R0DJQ8;A0A2H1WQ58;A0A2H1X1H4;A0A9R0DHX7;A0A9R0DHY5;A0A2H1VNF7	A0A9R0EYW8;A0A9R0DYA8;A0A9R0F005;A0A9R0DXN7;A0A9R0DXP4;A0A9R0DJQ8	12;12;12;12;12;12;1;1;1;1;1	12;12;12;12;12;12;1;1;1;1;1	12;12;12;12;12;12;1;1;1;1;1			tr|A0A9R0EYW8|A0A9R0EYW8_SPOFR non-specific serine/threonine protein kinase OS=Spodoptera frugiperda OX=7108 GN=LOC118280651 PE=3 SV=1;tr|A0A9R0DYA8|A0A9R0DYA8_SPOFR non-specific serine/threonine protein kinase OS=Spodoptera frugiperda OX=7108 GN=LOC118280	11	12	12	12	12	12	12	12.5	12.5	12.5	142.67	1306	1306;1574;1662;1663;1708;1709;150;512;659;670;818	0	46.812	12.5	111110000	111110000	2096500	2096500	16				570	173;226;734;1128;3195;3232;3234;3531;3715;4046;4378;4387	True;True;True;True;True;True;True;True;True;True;True;True	177;230;743;1145;3237;3274;3276;3579;3765;4109;4449;4458	232;298;919;1428;1429;4031;4078;4080;4481;4742;5190;5653;5666	341;444;1374;2174;2175;6138;6211;6212;6213;6214;6216;6834;7230;7875;8553;8569	341;444;1374;2175;6138;6213;6216;6834;7230;7875;8553;8569
A0A9R0DJR0;A0A2H1V0C7;A0A2H1V8X4	A0A9R0DJR0;A0A2H1V0C7	17;10;5	17;10;5	17;10;5			tr|A0A9R0DJR0|A0A9R0DJR0_SPOFR Nuclear migration protein nudC OS=Spodoptera frugiperda OX=7108 GN=LOC118281013 PE=3 SV=1;tr|A0A2H1V0C7|A0A2H1V0C7_SPOFR SFRICE_004895 OS=Spodoptera frugiperda OX=7108 GN=SFRICE_004895 PE=4 SV=1	3	17	17	17	17	17	17	60.7	60.7	60.7	37.412	326	326;180;227	0	128.56	60.7	1909000000	1909000000	95448000	95448000	30				571	387;857;936;1237;1446;1561;1775;2299;2537;2538;2841;3210;3611;3656;3976;5173;5820	True;True;True;True;True;True;True;True;True;True;True;True;True;True;True;True;True	394;867;948;1257;1467;1582;1799;2329;2571;2572;2878;3252;3660;3705;4035;5256;5910	491;1066;1161;1611;1868;1869;2007;2008;2259;2913;3203;3204;3601;4054;4621;4673;5107;6666;7466	714;715;716;1598;1599;1730;2453;2866;2867;3068;3069;3070;3436;4483;4911;4912;4913;4914;4915;4916;4917;5523;6178;7066;7067;7145;7766;10156;11381;11382	714;1598;1730;2453;2866;3070;3436;4483;4912;4916;5523;6178;7066;7145;7766;10156;11382
A0A9R0DKF2;A0A2H1VUW2;A0A2H1VD39	A0A9R0DKF2;A0A2H1VUW2	3;2;1	3;2;1	3;2;1			tr|A0A9R0DKF2|A0A9R0DKF2_SPOFR Succinate--CoA ligase [ADP/GDP-forming] subunit alpha, mitochondrial OS=Spodoptera frugiperda OX=7108 GN=LOC118281705 PE=3 SV=1;tr|A0A2H1VUW2|A0A2H1VUW2_SPOFR SFRICE_012172 (Fragment) OS=Spodoptera frugiperda OX=7108 GN=SFRIC	3	3	3	3	3	3	3	12.1	12.1	12.1	34.708	331	331;253;71	0	4.4411	12.1	92804000	92804000	7733700	7733700	2				572	2340;3711;5463	True;True;True	2371;3761;5550	2967;4737;7040	4563;7221;10755	4563;7221;10755
A0A9R0DL86;A0A9R0DLA4;A0A2H1X241	A0A9R0DL86;A0A9R0DLA4;A0A2H1X241	5;5;4	5;5;4	5;5;4			tr|A0A9R0DL86|A0A9R0DL86_SPOFR Glucose-induced degradation protein 8-A homolog isoform X1 OS=Spodoptera frugiperda OX=7108 GN=LOC118282393 PE=4 SV=1;tr|A0A9R0DLA4|A0A9R0DLA4_SPOFR Glucose-induced degradation protein 8-A homolog isoform X2 OS=Spodoptera fru	3	5	5	5	5	5	5	43.2	43.2	43.2	27.292	241	241;233;232	0	20.584	43.2	75594000	75594000	5814900	5814900	5				573	116;2510;2592;4683;4966	True;True;True;True;True	119;2544;2627;4758;5046	151;3168;3274;6059;6422	215;4857;5018;9244;9806	215;4857;5018;9244;9806
A0A9R0DLI3;A0A2H1W1L9	A0A9R0DLI3;A0A2H1W1L9	19;17	19;17	19;17			tr|A0A9R0DLI3|A0A9R0DLI3_SPOFR Aminopeptidase OS=Spodoptera frugiperda OX=7108 GN=LOC118272319 PE=3 SV=1;tr|A0A2H1W1L9|A0A2H1W1L9_SPOFR Aminopeptidase OS=Spodoptera frugiperda OX=7108 GN=SFRICE_000922 PE=3 SV=1	2	19	19	19	19	19	19	26.4	26.4	26.4	108.56	949	949;949	0	72.325	26.4	455270000	455270000	7987300	7987300	28				574	516;821;948;1315;2133;2784;3338;3359;3458;3735;4062;4324;4874;4906;5176;5303;5304;5824;5962	True;True;True;True;True;True;True;True;True;True;True;True;True;True;True;True;True;True;True	523;831;960;1336;2160;2821;3380;3402;3503;3785;4126;4393;4954;4986;5259;5386;5387;5914;6058	648;1018;1175;1707;2693;2694;3514;4218;4283;4388;4765;5211;5586;5587;5588;6302;6303;6342;6669;6834;6835;7470;7645	962;1527;1747;2618;2619;4076;4077;5389;6413;6414;6554;6696;7260;7908;8468;8469;8470;9614;9615;9616;9679;9680;10159;10160;10440;10441;11388;11633	962;1527;1747;2619;4076;5389;6414;6554;6696;7260;7908;8470;9614;9680;10160;10440;10441;11388;11633
A0A9R0DLK6	A0A9R0DLK6	67	1	1			tr|A0A9R0DLK6|A0A9R0DLK6_SPOFR Fatty acid synthase OS=Spodoptera frugiperda OX=7108 GN=LOC118272899 PE=4 SV=1	1	67	1	1	67	1	1	39.5	0.6	0.6	254.47	2391	2391	0.0014706	1.6273	39.5	3356300	3356300	26018	26018	1				575	26;126;331;406;440;545;617;690;694;696;804;817;866;871;1171;1230;1268;1578;1679;1760;1897;1978;1988;2035;2042;2151;2242;2745;2796;2809;2890;2892;2921;3037;3114;3381;3382;3401;3407;3411;3464;3500;3592;4069;4192;4492;4507;4525;4562;4650;4750;4973;5026;5196;5264;5400;5411;5488;5524;5532;5586;5623;5788;5819;5827;5892;6013	False;False;False;False;False;False;False;False;False;True;False;False;False;False;False;False;False;False;False;False;False;False;False;False;False;False;False;False;False;False;False;False;False;False;False;False;False;False;False;False;False;False;False;False;False;False;False;False;False;False;False;False;False;False;False;False;False;False;False;False;False;False;False;False;False;False;False	26;129;335;413;447;552;625;699;703;705;814;827;876;881;1189;1249;1289;1599;1702;1784;1922;2004;2014;2061;2068;2178;2271;2782;2833;2846;2927;2929;2958;3076;3154;3424;3425;3445;3452;3456;3509;3546;3641;4133;4261;4564;4580;4598;4636;4725;4826;5053;5108;5279;5347;5486;5497;5575;5611;5619;5673;5711;5878;5909;5917;5985;6109	31;32;162;420;421;513;558;684;775;871;875;877;999;1014;1078;1083;1481;1592;1646;2025;2140;2243;2394;2500;2511;2563;2573;2718;2845;3462;3527;3548;3664;3666;3698;3836;3837;3930;4306;4307;4328;4336;4340;4396;4397;4442;4601;5218;5384;5385;5802;5821;5842;5885;6017;6143;6429;6498;6702;6791;6963;6975;7068;7112;7120;7121;7183;7226;7430;7465;7475;7559;7735	41;42;227;228;610;611;747;817;1019;1154;1155;1294;1298;1300;1498;1522;1614;1619;1620;2246;2414;2511;2512;3090;3257;3404;3405;3638;3793;3794;3795;3808;3879;3897;4145;4388;4389;4390;4391;4392;4393;4394;5295;5410;5432;5433;5615;5617;5662;5857;5858;5859;6003;6586;6587;6618;6629;6633;6710;6711;6781;7042;7915;8151;8152;8778;8779;8780;8781;8782;8809;8842;8897;9176;9359;9814;9815;9922;10231;10380;10381;1…	42;228;611;747;817;1019;1154;1294;1298;1300;1498;1522;1614;1619;2246;2414;2512;3090;3257;3405;3638;3794;3808;3879;3897;4145;4389;5295;5410;5432;5615;5617;5662;5858;6003;6586;6587;6618;6629;6633;6710;6781;7042;7915;8152;8780;8809;8842;8897;9176;9359;9815;9922;10231;10380;10642;10656;10800;10861;10873;10961;11018;11312;11379;11393;11514;11792
A0A9R0DMG0;A0A2H1VL96;A0A2H1WCS9	A0A9R0DMG0;A0A2H1VL96	16;10;5	16;10;5	16;10;5			tr|A0A9R0DMG0|A0A9R0DMG0_SPOFR inositol-3-phosphate synthase OS=Spodoptera frugiperda OX=7108 GN=LOC118271915 PE=3 SV=1;tr|A0A2H1VL96|A0A2H1VL96_SPOFR inositol-3-phosphate synthase (Fragment) OS=Spodoptera frugiperda OX=7108 GN=SFRICE_008245 PE=3 SV=1	3	16	16	16	16	16	16	43.5	43.5	43.5	59.969	538	538;350;188	0	110.93	43.5	1444300000	1444300000	60181000	60181000	29				576	34;197;392;426;1193;1340;1704;2192;2413;3130;3675;4131;4761;5158;5456;5861	True;True;True;True;True;True;True;True;True;True;True;True;True;True;True;True	34;201;399;433;1212;1361;1728;2220;2445;3170;3725;4198;4837;5241;5543;5954	41;262;263;497;542;1547;1548;1734;2173;2771;3053;3952;4697;5293;5294;6154;6155;6648;7029;7517	52;392;393;726;795;796;2347;2348;2349;2350;2662;2663;2664;2665;2666;2667;3299;4242;4700;6032;6033;7175;8027;8028;9376;9377;10133;10729;11446	52;393;726;795;2349;2663;3299;4242;4700;6032;7175;8027;9376;10133;10729;11446
A0A9R0DMK4;A0A9R0DN82;A0A2H1W0M0;A0A2H1VK97	A0A9R0DMK4;A0A9R0DN82;A0A2H1W0M0	37;36;29;7	37;36;29;7	37;36;29;7			tr|A0A9R0DMK4|A0A9R0DMK4_SPOFR Pyruvate carboxylase OS=Spodoptera frugiperda OX=7108 GN=LOC118267677 PE=4 SV=1;tr|A0A9R0DN82|A0A9R0DN82_SPOFR Pyruvate carboxylase OS=Spodoptera frugiperda OX=7108 GN=LOC118267677 PE=4 SV=1;tr|A0A2H1W0M0|A0A2H1W0M0_SPOFR pyr	4	37	37	37	37	37	37	45.3	45.3	45.3	131.43	1200	1200;1183;928;324	0	299.79	45.3	804790000	804790000	12381000	12381000	56				577	94;121;195;196;498;867;1019;1172;1244;1358;1429;1507;1539;1550;1686;1858;1863;2124;2457;2520;2995;3000;4047;4253;4272;4303;4910;4998;5122;5134;5214;5279;5383;5481;5716;5733;5738	True;True;True;True;True;True;True;True;True;True;True;True;True;True;True;True;True;True;True;True;True;True;True;True;True;True;True;True;True;True;True;True;True;True;True;True;True	96;124;199;200;505;877;1036;1190;1265;1379;1450;1528;1560;1571;1710;1883;1888;2151;2490;2554;3033;3038;4110;4322;4341;4372;4990;5080;5205;5217;5297;5362;5467;5568;5805;5823;5828	112;157;260;261;627;1079;1294;1482;1620;1761;1762;1848;1941;1977;1978;1994;2150;2352;2357;2683;3104;3105;3181;3786;3792;5191;5458;5479;5553;6347;6348;6466;6467;6468;6607;6620;6725;6808;6943;7059;7343;7362;7367	151;152;222;389;390;391;919;920;1615;1952;2247;2473;2705;2706;2833;2988;2989;3031;3032;3050;3270;3271;3574;3583;4062;4765;4766;4877;4878;4879;4880;5786;5794;7876;8256;8283;8418;9695;9696;9873;9874;9875;10080;10095;10096;10097;10263;10403;10616;10787;10788;10789;10790;11205;11227;11233;11234	151;222;390;391;920;1615;1952;2247;2473;2706;2833;2989;3031;3050;3271;3574;3583;4062;4765;4878;5786;5794;7876;8256;8283;8418;9696;9875;10080;10096;10263;10403;10616;10789;11205;11227;11233
A0A9R0DNF1;A0A2H1WNP0	A0A9R0DNF1;A0A2H1WNP0	13;10	13;10	13;10			tr|A0A9R0DNF1|A0A9R0DNF1_SPOFR Probable methylmalonate-semialdehyde/malonate-semialdehyde dehydrogenase [acylating], mitochondrial OS=Spodoptera frugiperda OX=7108 GN=LOC118267546 PE=3 SV=1;tr|A0A2H1WNP0|A0A2H1WNP0_SPOFR Probable methylmalonate-semialdehyd	2	13	13	13	13	13	13	31.7	31.7	31.7	53.711	499	499;361	0	60.705	31.7	609680000	609680000	25403000	25403000	17				578	578;869;1398;1824;1950;4247;4920;5072;5140;5247;5601;5633;5634	True;True;True;True;True;True;True;True;True;True;True;True;True	586;879;1419;1849;1976;4316;5000;5154;5223;5330;5689;5721;5722	723;1081;1812;2313;2465;2466;5451;6360;6553;6628;6767;7200;7201;7237;7238	1078;1617;2785;2786;3522;3738;3739;8247;9712;10006;10109;10343;10984;10985;11031;11032;11033	1078;1617;2785;3522;3739;8247;9712;10006;10109;10343;10984;11031;11033
A0A9R0EWG0;A0A9R0DNK9;A0A9R0ETU4;A0A9R0EV33;A0A9R0DPW4;A0A9R0EUQ3;A0A2H1W3R9;A0A9R0DPQ2;A0A2H1W3T1	A0A9R0EWG0;A0A9R0DNK9;A0A9R0ETU4;A0A9R0EV33;A0A9R0DPW4;A0A9R0EUQ3;A0A2H1W3R9;A0A9R0DPQ2	8;8;8;8;8;8;7;6;1	8;8;8;8;8;8;7;6;1	8;8;8;8;8;8;7;6;1			tr|A0A9R0EWG0|A0A9R0EWG0_SPOFR Ran-binding protein 9 isoform X5 OS=Spodoptera frugiperda OX=7108 GN=LOC118265910 PE=3 SV=1;tr|A0A9R0DNK9|A0A9R0DNK9_SPOFR Ran-binding protein 9 isoform X7 OS=Spodoptera frugiperda OX=7108 GN=LOC118265910 PE=3 SV=1;tr|A0A9R0E	9	8	8	8	8	8	8	23.5	23.5	23.5	58.091	533	533;537;543;547;559;569;536;444;279	0	21.751	23.5	148300000	148300000	6448000	6448000	9				579	519;521;781;1784;1862;2333;3446;5579	True;True;True;True;True;True;True;True	526;528;790;1808;1887;2364;3491;5666	652;654;973;2269;2356;2958;4376;7175	969;972;1460;3450;3581;3582;4553;6683;10951	969;972;1460;3450;3581;4553;6683;10951
A0A9R0DPC2;A0A9R0DNS1;A0A9R0DPV9;A0A9R0EHE4;A0A2H1WQG7;A0A2H1WQ57	A0A9R0DPC2;A0A9R0DNS1;A0A9R0DPV9;A0A9R0EHE4;A0A2H1WQG7	10;10;10;10;7;2	10;10;10;10;7;2	10;10;10;10;7;2			tr|A0A9R0DPC2|A0A9R0DPC2_SPOFR Synaptic vesicle membrane protein VAT-1 homolog-like isoform X4 OS=Spodoptera frugiperda OX=7108 GN=LOC118265748 PE=3 SV=1;tr|A0A9R0DNS1|A0A9R0DNS1_SPOFR Synaptic vesicle membrane protein VAT-1 homolog-like isoform X3 OS=Spod	6	10	10	10	10	10	10	30.2	30.2	30.2	48.453	444	444;460;467;472;454;84	0	24.92	30.2	209820000	209820000	9537500	9537500	13				580	82;591;2810;2862;3585;4682;5378;5412;5499;5899	True;True;True;True;True;True;True;True;True;True	84;599;2847;2899;3634;4757;5462;5498;5586;5992	100;738;3549;3629;4594;6058;6937;6976;7082;7569	134;1096;1097;5434;5435;5566;7034;7035;9242;9243;10609;10657;10821;10822;11528	134;1096;5434;5566;7035;9243;10609;10657;10821;11528
A0A9R0ETQ6;A0A9R0DNX4;A0A9R0EUY9;A0A9R0EV80;A0A9R0EHJ3;A0A9R0DNQ9;A0A9R0DP49;A0A9R0DP08;A0A9R0DNS7;A0A9R0DNZ0;A0A9R0DNV5;A0A9R0DNA8;A0A9R0DPF6;A0A9R0CZN1;A0A2H1WAZ5;A0A9R0DPM5	A0A9R0ETQ6;A0A9R0DNX4;A0A9R0EUY9;A0A9R0EV80;A0A9R0EHJ3;A0A9R0DNQ9;A0A9R0DP49;A0A9R0DP08;A0A9R0DNS7;A0A9R0DNZ0;A0A9R0DNV5;A0A9R0DNA8;A0A9R0DPF6;A0A9R0CZN1;A0A2H1WAZ5;A0A9R0DPM5	10;10;9;9;9;9;9;8;8;8;8;8;8;8;8;7	10;10;9;9;9;9;9;8;8;8;8;8;8;8;8;7	10;10;9;9;9;9;9;8;8;8;8;8;8;8;8;7			tr|A0A9R0ETQ6|A0A9R0ETQ6_SPOFR CREB-regulated transcription coactivator 3 isoform X15 OS=Spodoptera frugiperda OX=7108 GN=LOC118265806 PE=3 SV=1;tr|A0A9R0DNX4|A0A9R0DNX4_SPOFR CREB-regulated transcription coactivator 3 isoform X14 OS=Spodoptera frugiperda	16	10	10	10	10	10	10	35.6	35.6	35.6	49.57	461	461;468;477;513;520;523;529;507;516;532;568;575;577;584;584;480	0	323.31	35.6	4284700000	4284700000	306050000	306050000	40				581	183;499;1389;2077;2751;4187;4424;4820;5038;5951	True;True;True;True;True;True;True;True;True;True	187;506;1410;2104;2788;4255;4495;4496;4897;5120;6047	243;244;245;628;1800;2616;3470;5374;5708;5709;5710;6239;6512;6513;7631;7632;7633	363;364;365;366;367;368;921;922;923;924;925;926;927;928;929;930;931;2764;3970;5307;8140;8632;8633;8634;9504;9505;9506;9507;9508;9509;9510;9511;9512;9513;9943;9944;9945;11618;11619;11620	368;927;2764;3970;5307;8140;8634;9508;9944;11620	62	161
A0A9R0DPA6;A0A2H1W9D9	A0A9R0DPA6;A0A2H1W9D9	15;14	15;14	15;14			tr|A0A9R0DPA6|A0A9R0DPA6_SPOFR RNA helicase OS=Spodoptera frugiperda OX=7108 GN=LOC118265968 PE=3 SV=1;tr|A0A2H1W9D9|A0A2H1W9D9_SPOFR RNA helicase OS=Spodoptera frugiperda OX=7108 GN=SFRICE_010080 PE=3 SV=1	2	15	15	15	15	15	15	33	33	33	65.679	600	600;591	0	36.287	33	372730000	372730000	10074000	10074000	15				582	223;579;846;1221;1307;1655;2058;2265;2819;3750;3771;4079;4643;4935;5675	True;True;True;True;True;True;True;True;True;True;True;True;True;True;True	227;587;856;1240;1328;1678;2085;2294;2856;3801;3825;4143;4718;5015;5764	295;724;1053;1580;1698;2111;2590;2871;3566;4788;4864;5228;6010;6380;7293	441;1079;1577;2397;2606;3209;3927;4429;5462;7291;7434;7936;9168;9747;11116	441;1079;1577;2397;2606;3209;3927;4429;5462;7291;7434;7936;9168;9747;11116
A0A9R0DPJ4;A0A9R0ETR9;A0A9R0EWC9;A0A9R0DP05;A0A2H1VL02;A0A2H1W0N9	A0A9R0DPJ4;A0A9R0ETR9;A0A9R0EWC9;A0A9R0DP05;A0A2H1VL02	21;21;20;20;19;2	21;21;20;20;19;2	21;21;20;20;19;2			tr|A0A9R0DPJ4|A0A9R0DPJ4_SPOFR threonine--tRNA ligase OS=Spodoptera frugiperda OX=7108 GN=LOC118265931 PE=3 SV=1;tr|A0A9R0ETR9|A0A9R0ETR9_SPOFR threonine--tRNA ligase OS=Spodoptera frugiperda OX=7108 GN=LOC118265931 PE=3 SV=1;tr|A0A9R0EWC9|A0A9R0EWC9_SPOFR	6	21	21	21	21	21	21	38.2	38.2	38.2	81.821	714	714;720;720;726;714;151	0	93.085	38.2	485460000	485460000	12448000	12448000	28				583	88;119;643;1281;1289;1489;1570;1682;1727;1828;2887;3724;3892;4051;4357;4379;5183;5435;5618;5790;5927	True;True;True;True;True;True;True;True;True;True;True;True;True;True;True;True;True;True;True;True;True	90;122;651;1302;1310;1510;1591;1706;1751;1853;2924;3774;3951;4114;4428;4450;5266;5522;5706;5880;6022	106;154;807;1665;1666;1674;1919;2017;2144;2200;2318;2319;3661;4754;5006;5196;5629;5654;6685;7003;7220;7221;7432;7602	144;218;219;1205;2554;2555;2556;2568;2569;2959;3082;3261;3335;3529;3530;3531;5610;5611;7246;7247;7630;7882;8524;8554;10207;10208;10694;11007;11008;11314;11584	144;218;1205;2556;2568;2959;3082;3261;3335;3531;5611;7247;7630;7882;8524;8554;10207;10694;11008;11314;11584
A0A9R0EVN2;A0A9R0DPK9;A0A2H1VNB2;A0A2H1VMT9	A0A9R0EVN2;A0A9R0DPK9;A0A2H1VNB2;A0A2H1VMT9	8;8;6;4	8;8;6;4	8;8;6;4			tr|A0A9R0EVN2|A0A9R0EVN2_SPOFR Sorting nexin-2 isoform X2 OS=Spodoptera frugiperda OX=7108 GN=LOC118266055 PE=3 SV=1;tr|A0A9R0DPK9|A0A9R0DPK9_SPOFR Sorting nexin-2 isoform X1 OS=Spodoptera frugiperda OX=7108 GN=LOC118266055 PE=3 SV=1;tr|A0A2H1VNB2|A0A2H1VN	4	8	8	8	8	8	8	24.4	24.4	24.4	50.947	450	450;468;403;204	0	13.282	24.4	113770000	113770000	4213700	4213700	10				584	29;77;347;396;531;985;1938;6025	True;True;True;True;True;True;True;True	29;79;352;403;538;1001;1964;6121	35;94;440;501;668;1255;2449;7748	45;46;128;642;730;731;999;1881;3721;11812	45;128;642;730;999;1881;3721;11812
A0A9R0EVU0;A0A9R0DPV7;A0A2H1X0D5;A0A2H1WIX1	A0A9R0EVU0;A0A9R0DPV7;A0A2H1X0D5	5;5;3;2	5;5;3;2	5;5;3;2			tr|A0A9R0EVU0|A0A9R0EVU0_SPOFR FAS-associated factor 1 isoform X2 OS=Spodoptera frugiperda OX=7108 GN=LOC118265774 PE=4 SV=1;tr|A0A9R0DPV7|A0A9R0DPV7_SPOFR FAS-associated factor 1 isoform X1 OS=Spodoptera frugiperda OX=7108 GN=LOC118265774 PE=4 SV=1;tr|A0A	4	5	5	5	5	5	5	9.7	9.7	9.7	72.029	642	642;645;427;193	0	11.537	9.7	69789000	69789000	3673100	3673100	5				585	18;3783;3877;4415;5627	True;True;True;True;True	18;3838;3936;4486;5715	21;4880;4988;5698;7231	29;7456;7610;8620;11024	29;7456;7610;8620;11024
A0A9R0DQX1;A0A9R0DQW0;A0A9R0DQ80;A0A2H1VQW4;A0A2H1VNI9;A0A2H1WN07;A0A2H1WN03	A0A9R0DQX1;A0A9R0DQW0;A0A9R0DQ80;A0A2H1VQW4	40;40;40;21;16;7;3	40;40;40;21;16;7;3	40;40;40;21;16;7;3			tr|A0A9R0DQX1|A0A9R0DQX1_SPOFR ubiquitinyl hydrolase 1 OS=Spodoptera frugiperda OX=7108 GN=LOC118275880 PE=3 SV=1;tr|A0A9R0DQW0|A0A9R0DQW0_SPOFR ubiquitinyl hydrolase 1 OS=Spodoptera frugiperda OX=7108 GN=LOC118275880 PE=3 SV=1;tr|A0A9R0DQ80|A0A9R0DQ80_SPO	7	40	40	40	40	40	40	17.2	17.2	17.2	371.21	3351	3351;3360;3361;1233;1484;852;262	0	84.847	17.2	505080000	505080000	2919500	2919500	49				586	38;267;352;468;582;667;865;982;1008;1125;1264;1271;1503;1680;1690;1700;2357;2969;3009;3048;3064;3084;3090;3158;3305;3621;3696;3754;3827;3973;4198;4210;4390;4495;4501;4767;4980;5032;5090;5999	True;True;True;True;True;True;True;True;True;True;True;True;True;True;True;True;True;True;True;True;True;True;True;True;True;True;True;True;True;True;True;True;True;True;True;True;True;True;True;True	38;271;357;475;590;675;875;998;1025;1142;1285;1292;1524;1703;1714;1724;2388;3007;3047;3087;3103;3123;3129;3199;3347;3670;3746;3805;3884;4032;4267;4279;4461;4567;4574;4843;5061;5114;5172;6095	46;346;446;592;593;728;839;1077;1251;1281;1423;1424;1642;1650;1937;2141;2155;2169;2984;3756;3801;3849;3868;3892;3901;3984;4177;4632;4722;4794;4930;5104;5392;5405;5669;5805;5815;6163;6442;6505;6572;7716	58;504;651;862;863;1083;1246;1613;1875;1936;2169;2170;2506;2507;2519;2983;3258;3276;3293;4586;5739;5740;5810;5875;5903;5940;5954;6076;6077;6357;7082;7083;7204;7301;7518;7761;7762;8163;8164;8179;8572;8573;8574;8786;8799;9389;9838;9930;10030;11763;11764	58;504;651;862;1083;1246;1613;1875;1936;2170;2507;2519;2983;3258;3276;3293;4586;5740;5810;5875;5903;5940;5954;6076;6357;7083;7204;7301;7518;7762;8163;8179;8574;8786;8799;9389;9838;9930;10030;11764
A0A9R0DQB9;A0A2H1WKD0;A0A2H1WKE8;A0A2H1WWP0	A0A9R0DQB9;A0A2H1WKD0	13;7;6;5	13;7;6;5	13;7;6;5			tr|A0A9R0DQB9|A0A9R0DQB9_SPOFR DNA damage-binding protein 1 OS=Spodoptera frugiperda OX=7108 GN=LOC118275635 PE=3 SV=1;tr|A0A2H1WKD0|A0A2H1WKD0_SPOFR DNA damage-binding protein 1 (Fragment) OS=Spodoptera frugiperda OX=7108 GN=SFRICE_013904 PE=3 SV=1	4	13	13	13	13	13	13	13.7	13.7	13.7	125.13	1136	1136;1250;406;262	0	55.137	13.7	383080000	383080000	7094100	7094100	16				587	722;1715;2971;3221;3470;3488;3574;4592;4744;4979;5193;5238;5705	True;True;True;True;True;True;True;True;True;True;True;True;True	731;1739;3009;3263;3515;3534;3622;4667;4820;5060;5276;5321;5794	904;2188;3758;4066;4406;4428;4530;5954;6136;6441;6698;6757;7332	1345;3320;3321;5742;5743;6194;6733;6761;6899;6900;9086;9349;9837;10223;10316;11187	1345;3320;5742;6194;6733;6761;6899;9086;9349;9837;10223;10316;11187
A0A9R0EXB5;A0A9R0EVZ4;A0A9R0EVH1;A0A9R0DQZ3;A0A9R0DQM7;A0A9R0DQL6;A0A2H1WQ42;A0A9R0EUL0;A0A9R0DRL9;A0A9R0EW84;A0A9R0DDD9;A0A9R0DQW3	A0A9R0EXB5;A0A9R0EVZ4;A0A9R0EVH1;A0A9R0DQZ3;A0A9R0DQM7;A0A9R0DQL6;A0A2H1WQ42;A0A9R0EUL0;A0A9R0DRL9;A0A9R0EW84;A0A9R0DDD9;A0A9R0DQW3	6;6;6;6;6;6;5;5;5;5;5;5	6;6;6;6;6;6;5;5;5;5;5;5	6;6;6;6;6;6;5;5;5;5;5;5			tr|A0A9R0EXB5|A0A9R0EXB5_SPOFR Ribosome-binding protein 1 isoform X11 OS=Spodoptera frugiperda OX=7108 GN=LOC118275350 PE=4 SV=1;tr|A0A9R0EVZ4|A0A9R0EVZ4_SPOFR Ribosome-binding protein 1 isoform X9 OS=Spodoptera frugiperda OX=7108 GN=LOC118275350 PE=4 SV=1	12	6	6	6	6	6	6	8.6	8.6	8.6	88.335	805	805;840;866;867;901;902;539;825;861;887;921;922	0	7.4781	8.6	12626000	12626000	274490	274490	8				588	444;2878;3133;4746;4977;5236	True;True;True;True;True;True	451;2915;3173;4822;5058;5319	563;3651;3955;6138;6439;6755	827;5596;5597;6037;6038;9353;9835;10313	827;5596;6038;9353;9835;10313
A0A9R0DRL5;A0A9R0DS45;A0A9R0DRV2;A0A9R0DRW0;A0A9R0DR62;A0A2H1WHS0	A0A9R0DRL5;A0A9R0DS45;A0A9R0DRV2;A0A9R0DRW0;A0A9R0DR62;A0A2H1WHS0	12;12;12;12;12;10	12;12;12;12;12;10	12;12;12;12;12;10			tr|A0A9R0DRL5|A0A9R0DRL5_SPOFR Probable aminopeptidase NPEPL1 isoform X5 OS=Spodoptera frugiperda OX=7108 GN=LOC118277556 PE=3 SV=1;tr|A0A9R0DS45|A0A9R0DS45_SPOFR Probable aminopeptidase NPEPL1 isoform X4 OS=Spodoptera frugiperda OX=7108 GN=LOC118277556 PE	6	12	12	12	12	12	12	33.3	33.3	33.3	55.933	532	532;551;552;554;556;425	0	33.224	33.3	247250000	247250000	9157400	9157400	16				589	12;107;580;692;965;1175;1501;1864;1881;3589;4499;4604	True;True;True;True;True;True;True;True;True;True;True;True	12;110;588;701;978;1193;1522;1889;1906;3638;4571;4679	15;140;725;873;1194;1485;1935;2358;2375;4598;5809;5966;5967	20;21;202;1080;1296;1777;2250;2980;3584;3610;7039;8790;8791;9105;9106;9107	21;202;1080;1296;1777;2250;2980;3584;3610;7039;8790;9106
A0A9R0DRH2;A0A2H1WGX5;A0A2H1W6U6	A0A9R0DRH2;A0A2H1WGX5;A0A2H1W6U6	10;9;7	10;9;7	10;9;7			tr|A0A9R0DRH2|A0A9R0DRH2_SPOFR GMP reductase OS=Spodoptera frugiperda OX=7108 GN=LOC118277337 PE=3 SV=1;tr|A0A2H1WGX5|A0A2H1WGX5_SPOFR GMP reductase OS=Spodoptera frugiperda OX=7108 GN=SFRICE_029457 PE=3 SV=1;tr|A0A2H1W6U6|A0A2H1W6U6_SPOFR GMP reductase (F	3	10	10	10	10	10	10	46.5	46.5	46.5	37.706	346	346;333;298	0	25.903	46.5	357700000	357700000	18826000	18826000	18				590	23;1413;1800;2010;2200;3535;4161;4503;5024;6035	True;True;True;True;True;True;True;True;True;True	23;1434;1824;2036;2228;3583;4229;4576;5106;6131	28;1831;2285;2533;2780;4485;5341;5817;6496;7759	38;2808;2809;2810;3473;3837;3838;4256;4257;4258;4259;4260;4261;6838;8089;8801;8802;9920;11829	38;2808;3473;3837;4258;6838;8089;8801;9920;11829
A0A9R0DS07;A0A2H1WXJ3	A0A9R0DS07;A0A2H1WXJ3	18;14	18;14	18;14			tr|A0A9R0DS07|A0A9R0DS07_SPOFR tRNA (cytosine(34)-C(5))-methyltransferase OS=Spodoptera frugiperda OX=7108 GN=LOC118277603 PE=3 SV=1;tr|A0A2H1WXJ3|A0A2H1WXJ3_SPOFR tRNA (cytosine(34)-C(5))-methyltransferase OS=Spodoptera frugiperda OX=7108 GN=SFRICE_024863	2	18	18	18	18	18	18	32.9	32.9	32.9	84.126	741	741;600	0	49.584	32.9	380560000	380560000	9281900	9281900	26				591	616;756;977;1055;1257;2425;2459;2659;2802;3065;3141;3251;3455;3506;3619;3953;4009;5330	True;True;True;True;True;True;True;True;True;True;True;True;True;True;True;True;True;True	624;765;993;1072;1278;2458;2492;2695;2839;3104;3182;3293;3500;3552;3668;4012;4071;5413	773;774;947;1246;1337;1635;3067;3107;3361;3539;3869;3870;3871;3965;4099;4385;4448;4630;5076;5151;6864	1150;1151;1152;1153;1421;1870;2016;2017;2018;2499;4714;4768;5136;5137;5138;5422;5904;5905;5906;6054;6242;6692;6693;6787;7079;7719;7825;10483	1153;1421;1870;2018;2499;4714;4768;5137;5422;5905;6054;6242;6692;6787;7079;7719;7825;10483
A0A9R0DS73;A0A9R0EVS1;A0A9R0EWJ1;A0A9R0EWA1;A0A9R0DRL1;A0A2H1VM80	A0A9R0DS73;A0A9R0EVS1;A0A9R0EWJ1;A0A9R0EWA1;A0A9R0DRL1;A0A2H1VM80	14;14;14;11;11;10	14;14;14;11;11;10	14;14;14;11;11;10			tr|A0A9R0DS73|A0A9R0DS73_SPOFR SWI/SNF-related matrix-associated actin-dependent regulator of chromatin subfamily E member 1 isoform X4 OS=Spodoptera frugiperda OX=7108 GN=LOC118271116 PE=4 SV=1;tr|A0A9R0EVS1|A0A9R0EVS1_SPOFR SWI/SNF-related matrix-associa	6	14	14	14	14	14	14	29.8	29.8	29.8	63.18	587	587;602;647;585;645;651	0	125.94	29.8	1048300000	1048300000	38826000	38826000	23				592	24;589;590;611;1505;1830;2068;2699;2728;2779;3186;4386;4401;5182	True;True;True;True;True;True;True;True;True;True;True;True;True;True	24;597;598;619;1526;1855;2095;2735;2764;2816;3228;4457;4472;5265	29;736;737;766;1939;2321;2322;2602;3406;3442;3508;4021;5661;5662;5663;5664;5665;5683;6684	39;1094;1095;1136;2985;2986;3533;3534;3942;3943;5208;5209;5262;5381;6126;6127;8563;8564;8565;8566;8567;8568;8594;10206	39;1094;1095;1136;2985;3533;3942;5208;5262;5381;6126;8564;8594;10206
A0A9R0DSH6;A0A2H1VJ79;A0A2H1VJ75	A0A9R0DSH6;A0A2H1VJ79	20;15;9	20;15;9	16;15;9			tr|A0A9R0DSH6|A0A9R0DSH6_SPOFR N-alpha-acetyltransferase 15, NatA auxiliary subunit OS=Spodoptera frugiperda OX=7108 GN=LOC118271157 PE=4 SV=1;tr|A0A2H1VJ79|A0A2H1VJ79_SPOFR SFRICE_025089 OS=Spodoptera frugiperda OX=7108 GN=SFRICE_025089 PE=4 SV=1	3	20	20	16	20	20	16	28.7	28.7	20.7	100.46	869	869;592;466	0	41.715	28.7	787660000	787660000	15753000	15753000	27				593	203;852;1255;1353;1414;2054;2286;2687;2711;2870;2965;2993;3182;3443;3448;3566;4790;4877;4929;5282	True;True;True;True;True;True;True;True;True;True;True;True;True;True;True;True;True;True;True;True	207;862;1276;1374;1435;2081;2315;2723;2747;2907;3003;3031;3223;3488;3493;3614;4866;4957;5009;5365	269;1061;1633;1751;1832;1833;2586;2895;3391;3419;3640;3752;3784;4015;4373;4378;4519;6188;6306;6307;6372;6811	403;1587;2497;2694;2811;2812;3922;3923;4456;5183;5230;5580;5733;5734;5735;5781;6119;6680;6685;6882;9428;9619;9620;9621;9622;9623;9736;10406	403;1587;2497;2694;2812;3923;4456;5183;5230;5580;5734;5781;6119;6680;6685;6882;9428;9622;9736;10406
A0A9R0DSK5;A0A2H1WZ68;A0A2H1WCL0	A0A9R0DSK5;A0A2H1WZ68	6;4;2	6;4;2	6;4;2			tr|A0A9R0DSK5|A0A9R0DSK5_SPOFR 5-oxoprolinase OS=Spodoptera frugiperda OX=7108 GN=LOC118277597 PE=3 SV=1;tr|A0A2H1WZ68|A0A2H1WZ68_SPOFR SFRICE_025530 OS=Spodoptera frugiperda OX=7108 GN=SFRICE_025530 PE=4 SV=1	3	6	6	6	6	6	6	6.3	6.3	6.3	139.29	1292	1292;618;680	0	7.4908	6.3	33720000	33720000	488690	488690	6				594	179;2463;3652;3818;4856;5334	True;True;True;True;True;True	183;2496;3701;3874;4934;5417	238;3111;4668;4919;6282;6868	353;4772;7140;7505;9569;10487	353;4772;7140;7505;9569;10487
[truncated: 138 more rows]
