# Supplementary material for: Dual-specific autophosphorylation of kinase IKK2 enables phosphorylation of substrate IκBα through a phosphoenzyme intermediate
Source: eLife. 2025 Jun 30;13:RP98009. doi: 10.7554/eLife.98009 (PMC12208667; doi:10.7554/eLife.98009)
Supplement: Supplementary file 2. [file elife-98009-supp2.xlsx]

## Sheet: Sheet1
Unique peptides Kinase	MS/MS count Kinase	iBAQ Kinase	Unique peptides others	MS/MS count others	iBAQ others
65	1196	5379300000	17	66	1762200000
1	5	404180000	33	158	1576800000
11	10	11410000	15	99	1452100000
9	10	7671900	13	35	896580000
17	18	5164600	2	162	708150000			Data for Only Kinase showed in Figure 1-figure supplement 1D (panels left and right)
5	7	4973900	45	151	647060000
13	18	3676400	15	61	613840000
3	4	3122700	10	28	588650000			Data for Others except kinase showed in Figure 1-figure supplement 1D (panel left)
12	16	2096500	5	22	468740000
3	3	1957200	25	68	399010000
2	1	1506200	20	91	376830000
5	7	1010600	12	28	361490000
4	5	985200	2	81	352590000
1	1	888310	17	63	327240000
1	1	881610	10	40	306050000
4	5	619350	2	99	281760000
2	3	249310	25	70	263450000
2	2	85471	2	97	243870000
1	2	85354	15	26	232570000
			1	70	210640000
			14	36	203130000
			15	30	202620000
			26	64	198830000
			4	82	185860000
			25	112	178190000
			23	50	167900000
			40	103	164900000
			2	19	147830000
			13	34	143940000
			35	76	143050000
			24	62	142290000
			1	18	133500000
			20	56	129220000
			12	28	128720000
			5	7	125130000
			42	102	123220000
			31	215	122750000
			13	30	114050000
			6	10	108230000
			1	1	104460000
			6	13	101230000
			1	57	100950000
			2	2	95521000
			17	30	95448000
			25	46	92899000
			1	91	91870000
			10	40	88862000
			32	83	88858000
			72	145	86959000
			21	80	86034000
			13	37	85644000
			8	16	76111000
			17	37	71783000
			14	24	70129000
			41	87	67522000
			8	13	66920000
			10	39	66274000
			2	52	64745000
			1	127	61559000
			16	29	60181000
			16	24	58931000
			16	36	57263000
			19	35	56616000
			25	59	56409000
			2	9	56382000
			14	30	53285000
			18	34	51000000
			18	30	49479000
			11	18	47871000
			1	1	47265000
			11	25	46581000
			19	37	46383000
			2	30	44659000
			22	48	43877000
			41	78	43770000
			6	12	42619000
			15	18	42222000
			21	39	41399000
			1	13	41174000
			23	46	40931000
			7	11	40120000
			3	1	40047000
			7	11	39883000
			14	23	38826000
			26	56	38742000
			1	1	38370000
			21	38	37535000
			25	38	36946000
			17	24	36820000
			5	44	36527000
			19	69	36032000
			4	4	35148000
			2	3	35029000
			22	41	34334000
			8	15	34058000
			5	16	34029000
			12	16	33737000
			3	3	33654000
			3	77	32825000
			7	9	32560000
			5	10	31897000
			20	29	31871000
			23	33	31862000
			13	17	31654000
			8	13	31588000
			14	34	31574000
			16	23	30723000
			4	6	30511000
			5	7	30054000
			31	43	29632000
			8	15	29531000
			25	31	29164000
			1	41	28473000
			33	61	28342000
			52	111	26561000
			6	8	26492000
			17	28	26364000
			9	12	26119000
			9	17	25672000
			4	6	25479000
			10	11	25428000
			13	17	25403000
			7	9	24551000
			5	10	24029000
			4	5	23557000
			8	10	23353000
			2	3	23271000
			12	18	23140000
			9	9	22480000
			31	42	22448000
			10	18	22168000
			10	15	22082000
			5	7	22077000
			22	31	22035000
			13	16	21938000
			9	16	21750000
			9	22	21672000
			25	46	21628000
			3	3	21101000
			1	1	21035000
			2	6	20216000
			17	27	20097000
			7	9	19938000
			13	36	19436000
			33	37	19351000
			14	21	19116000
			2	2	19057000
			13	23	19030000
			10	18	18826000
			3	2	18605000
			10	14	17771000
			20	22	17154000
			15	24	16724000
			9	14	16636000
			0	2	16151000
			9	14	16041000
			21	38	15808000
			16	27	15753000
			10	11	15392000
			6	13	15095000
			12	18	15056000
			10	12	14754000
			26	45	14591000
			10	13	14545000
			22	32	14415000
			10	20	14260000
			12	10	14161000
			26	35	14097000
			19	30	14068000
			4	4	13872000
			5	6	13642000
			16	22	13595000
			12	26	13321000
			12	13	13321000
			14	16	13227000
			6	8	13085000
			4	9	12963000
			13	15	12899000
			20	36	12850000
			8	7	12841000
			8	9	12770000
			13	14	12751000
			3	4	12625000
			9	8	12524000
			14	20	12514000
			21	28	12448000
			37	56	12381000
			13	22	12366000
			6	7	12260000
			15	20	12143000
			2	95	12047000
			25	36	11762000
			26	33	11666000
			1	10	11620000
			6	9	11454000
			31	37	11069000
			7	8	10904000
			4	3	10700000
			3	5	10690000
			1	2	10656000
			5	45	10633000
			4	8	10608000
			11	16	10300000
			17	24	10269000
			15	22	10193000
			17	18	10180000
			3	5	10100000
			15	15	10074000
			12	15	9927700
			5	9	9905800
			5	10	9889700
			16	21	9830700
			10	13	9537500
			5	33	9449100
			12	24	9410000
			18	26	9281900
			12	16	9157400
			21	24	9125100
			1	1	8811500
			2	3	8770700
			6	8	8743400
			1	5	8625400
			9	10	8526000
			7	10	8438500
			13	16	8412100
			10	12	8337200
			10	12	8330900
			7	10	8266300
			3	3	8172700
			1	1	8147500
			1	1	7987600
			19	28	7987300
			19	27	7978900
			6	7	7936500
			7	8	7783900
			3	2	7733700
			10	21	7712700
			6	10	7685200
			11	14	7673600
			5	5	7653300
			3	5	7575000
			5	5	7555100
			5	6	7538800
			10	16	7519700
			13	21	7502800
			9	12	7481700
			6	8	7422800
			16	22	7332900
			2	3	7233500
			41	50	7225600
			2	1	7193900
			8	14	7177000
			1	1	7158900
			1	7	7138000
			13	16	7094100
			9	11	7078500
			4	7	6993100
			9	14	6875100
			4	5	6783700
			4	4	6766100
			8	10	6754400
			7	22	6737500
			9	14	6664500
			1	1	6627500
			6	6	6594000
			10	17	6550300
			6	7	6528900
			3	2	6505400
			8	8	6476600
			8	9	6448000
			9	15	6433400
			1	4	6350200
			6	7	6349700
			18	21	6271000
			5	9	6208200
			7	7	6146300
			2	1	6138200
			15	16	5961200
			7	8	5883900
			5	4	5849600
			5	5	5814900
			2	2	5769100
			4	4	5755800
			9	12	5745400
			10	15	5729200
			8	14	5640100
			1	1	5606800
			3	12	5562600
			2	2	5539400
			2	1	5442700
			3	2	5405300
			1	1	5393700
			12	17	5345700
			7	7	5290000
			7	11	5284200
			4	5	5215600
			3	6	5184700
			4	5	5146900
			4	5	5113800
			1	1	5058400
			12	15	5037600
			2	1	4984300
			5	9	4978900
			7	8	4963200
			8	14	4935200
			1	17	4891600
			13	21	4889800
			1	7	4881600
			1	2	4806700
			3	3	4775000
			24	37	4693600
			5	9	4691000
			6	10	4688600
			4	4	4667700
			11	15	4654400
			4	5	4584400
			5	5	4557900
			5	7	4532600
			8	11	4510300
			1	1	4504500
			1	3	4480000
			4	12	4444000
			3	4	4443000
			5	7	4419500
			3	5	4367500
			1	1	4340200
			11	13	4284200
			2	5	4267600
			3	3	4263100
			9	10	4239400
			18	24	4239300
			8	10	4213700
			17	25	4165700
			1	1	4158400
			4	6	4134000
			5	9	4105800
			9	18	4063400
			3	4	4005100
			11	13	3999700
			2	10	3968700
			13	12	3959300
			6	15	3948900
			1	1	3920000
			9	11	3867200
			1	3	3835100
			3	3	3818000
			7	8	3808000
			16	16	3803500
			7	7	3757500
			13	14	3731400
			2	2	3729900
			8	8	3710000
			5	6	3691300
			5	5	3673100
			19	26	3626100
			1	1	3588100
			10	15	3587100
			5	8	3566500
			21	28	3513500
			9	9	3489800
			2	3	3489000
			3	3	3474200
			13	18	3468800
			1	1	3400900
			2	2	3369700
			3	3	3347100
			2	2	3341400
			1	1	3325800
			21	22	3321600
			5	7	3229800
			1	1	3189900
			1	1	3177300
			2	2	3171100
			4	3	3164500
			1	1	3150500
			3	5	3109900
			5	6	3103200
			1	1	2938800
			12	17	2927500
			40	49	2919500
			4	6	2918000
			3	3	2911700
			9	12	2909900
			1	1	2882900
			1	1	2874700
			8	10	2856100
			15	17	2855900
			6	5	2832900
			3	4	2828800
			4	6	2799600
			2	2	2791900
			1	1	2699600
			3	3	2668100
			3	3	2667100
			3	3	2657200
			1	18	2645500
			6	6	2625400
			7	10	2609100
			4	3	2583700
			1	1	2550400
			3	6	2538300
			3	3	2527900
			6	6	2524500
			5	7	2484100
			6	10	2421900
			3	5	2409100
			5	7	2393100
			3	4	2370600
			8	9	2336800
			4	6	2319600
			10	9	2285800
			6	6	2255000
			5	6	2143400
			3	2	2142500
			1	0	2137600
			2	2	2115200
			3	8	2111500
			9	10	2083000
			6	7	2034800
			1	2	2001000
			8	9	1982700
			2	2	1974600
			5	6	1905100
			5	4	1899200
			2	2	1896000
			3	8	1880500
			3	3	1859500
			6	6	1846800
			5	5	1834200
			3	3	1828400
			6	8	1788500
			2	1	1771300
			9	13	1770500
			6	5	1765800
			3	4	1761500
			11	12	1755900
			6	5	1727800
			7	7	1696900
			4	6	1665400
			5	5	1633200
			18	20	1610400
			6	9	1591800
			4	15	1581400
			2	3	1580000
			4	6	1560600
			6	9	1548900
			5	7	1536800
			18	22	1502200
			4	5	1472700
			1	2	1464000
			2	2	1461500
			5	2	1459900
			3	3	1459600
			4	7	1441400
			7	7	1434600
			7	7	1433300
			1	1	1425600
			4	4	1414000
			1	1	1405700
			3	2	1396000
			2	2	1392500
			3	3	1392500
			1	2	1366100
			3	4	1364900
			5	8	1342500
			1	1	1331100
			2	2	1330300
			10	10	1302000
			3	3	1293100
			7	10	1279000
			3	4	1272100
			7	6	1263200
			2	4	1254800
			1	3	1242200
			9	9	1218400
			3	6	1215100
			3	3	1210300
			10	13	1204700
			5	5	1195200
			2	4	1182100
			6	8	1175700
			6	7	1169600
			1	1	1142500
			3	3	1131100
			5	6	1111700
			2	2	1090400
			5	5	1088700
			8	9	1082600
			9	9	1080300
			2	2	1077200
			5	5	1071900
			2	2	1060500
			2	5	1045200
			3	3	1038100
			3	3	1030500
			6	6	1016800
			1	0	1014600
			3	6	1000900
			6	6	989190
			3	4	984610
			1	1	967290
			1	1	957880
			4	6	957860
			5	5	948610
			2	3	947210
			1	1	931660
			1	1	928500
			3	3	920970
			8	12	887830
			4	6	864900
			4	5	856450
			2	2	845610
			2	2	829920
			5	8	823710
			6	6	816680
			2	2	808540
			5	5	784910
			5	6	774150
			3	3	773470
			3	3	770590
			2	2	770480
			9	11	764810
			6	7	763070
			3	4	755440
			1	2	744570
			3	3	727840
			2	2	719920
			6	7	712560
			2	2	712220
			5	8	709950
			1	1	695230
			10	9	694790
			4	4	683510
			2	1	674980
			3	3	668690
			2	2	664220
			1	2	655400
			2	3	650950
			4	5	628860
			2	3	596280
			5	4	574100
			2	5	573410
			2	7	562000
			3	4	561690
			12	14	554420
			3	3	541270
			1	2	540570
			4	6	518730
			4	5	515630
			2	1	505840
			5	5	503500
			2	2	492650
			2	2	489960
			6	6	488690
			7	8	477170
			3	4	470790
			1	4	461210
			2	3	461050
			1	1	445720
			8	9	443460
			3	3	440410
			1	1	422690
			1	0	421310
			4	4	411230
			1	2	410630
			5	6	408560
			4	4	403600
			4	3	390520
			1	1	388060
			2	2	387770
			1	1	384570
			2	2	380470
			3	4	376260
			1	1	375130
			2	3	364920
			4	4	364000
			2	2	358120
			1	1	352070
			5	5	350830
			4	4	343790
			2	3	337850
			1	2	332960
			4	5	331320
			2	6	324160
			1	2	311990
			3	3	307490
			2	2	307030
			1	3	300830
			3	3	297200
			3	3	292270
			4	4	289550
			2	4	277990
			6	8	274490
			3	6	270360
			1	1	260580
			3	7	253990
			4	4	245390
			5	5	243800
			2	4	239490
			2	2	233420
			3	4	229420
			2	2	228880
			2	2	227480
			5	5	224490
			1	1	221070
			2	3	215890
			1	2	214720
			1	1	210370
			3	5	208920
			5	6	208460
			3	4	201600
			1	2	194870
			1	2	187770
			2	5	182640
			3	2	178370
			1	1	177980
			4	5	173350
			1	1	165250
			4	4	161980
			1	2	159170
			3	2	158830
			1	1	155660
			2	2	153810
			1	1	152440
			3	4	150940
			4	5	147760
			3	3	141300
			1	1	139460
			1	3	133600
			2	2	126330
			1	2	126130
			3	3	125530
			1	1	122090
			1	1	120930
			1	1	119370
			2	2	116110
			1	2	115010
			2	3	114920
			3	2	109110
			1	1	109050
			2	2	105990
			3	4	98630
			1	1	96659
			4	4	90382
			1	2	89243
			3	3	88885
			1	2	87252
			2	4	83328
			3	3	80815
			3	4	75822
			2	2	75033
			1	1	73133
			2	2	66577
			1	1	66413
			1	2	65567
			2	3	60480
			1	1	52242
			2	2	52241
			1	1	52227
			2	1	49800
			2	2	49575
			1	1	49228
			1	1	49093
			1	1	46884
			2	2	46214
			2	2	36627
			2	2	35679
			3	3	34717
			1	4	33542
			1	1	32112
			2	2	31275
			1	1	29620
			1	1	26314
			1	1	26018
			1	1	24741
			1	1	24624
			2	3	24286
			1	1	14584
			1	1	12499
			3	4	12049
			2	2	11381
			1	1	10546
			1	1	9112.4
			2	3	9048.5
			1	1	9045.6
			1	1	4972.9
			1	1	0
			1	1	0
			1	1	0
			1	1	0
			1	1	0
			1	1	0
			1	1	0
			1	1	0
			1	1	0
			1	1	0
			1	1	0
			1	1	0
			1	1	0
			1	1	0
			1	1	0
			1	1	0
			1	1	0
			1	1	0
			1	1	0
			1	1	0
			1	1	0
			1	1	0
