# Supplementary material for: Dual-specific autophosphorylation of kinase IKK2 enables phosphorylation of substrate IκBα through a phosphoenzyme intermediate
Source: eLife. 2025 Jun 30;13:RP98009. doi: 10.7554/eLife.98009 (PMC12208667; doi:10.7554/eLife.98009)
Supplement: Supplementary file 3. [file elife-98009-supp3.xlsx]

## Sheet: Sheet1
Time (ns)	UnP-IKK2	p-IKK2	P-IKK2
0	-859940	-861098	-866172
0.01	-857881	-864334	-865398
0.02	-862762	-862943	-866292
0.03	-859241	-861878	-866219
0.04	-859521	-865387	-869205
0.05	-858054	-863681	-864989
0.06	-861841	-863208	-867914
0.07	-864128	-865340	-865816
0.08	-861772	-861632	-863081
0.09	-858537	-865824	-865209
0.1	-861939	-867361	-865276
0.11	-860262	-862804	-867024
0.12	-858722	-866536	-864389
0.13	-860010	-865131	-866750
0.14	-860691	-862580	-865311
0.15	-859185	-863597	-862788
0.16	-863167	-862934	-866974
0.17	-864635	-864515	-867392
0.18	-862605	-861697	-865128
0.19	-860331	-864998	-861038
0.2	-861542	-863496	-866653
0.21	-859964	-862314	-867288
0.22	-861287	-864188	-867638
0.23	-860036	-865188	-867708
0.24	-860519	-864943	-867035
0.25	-861430	-865790	-863961
0.26	-860425	-862024	-865149
0.27	-861865	-859902	-867062
0.28	-862340	-862472	-864716
0.29	-860941	-864473	-867605
0.3	-862141	-861176	-865374
0.31	-861191	-864580	-866785
0.32	-860130	-863659	-865563
0.33	-860901	-864591	-864334
0.34	-862065	-864404	-867747
0.35	-861584	-863664	-867576
0.36	-861365	-866974	-865914
0.37	-864543	-862073	-866848
0.38	-861730	-862432	-866187
0.39	-862767	-863654	-864108
0.4	-862358	-863340	-865470
0.41	-866046	-861686	-867678
0.42	-862835	-865125	-866507
0.43	-859634	-865474	-864727
0.44	-860739	-863876	-863095
0.45	-861680	-862796	-868641
0.46	-862860	-866785	-863988
0.47	-862032	-866455	-867827
0.48	-858887	-863216	-867489
0.49	-860913	-864043	-866903
0.5	-860535	-863522	-866362
0.51	-862726	-862411	-866492
0.52	-861374	-865943	-866890
0.53	-860886	-865159	-866422
0.54	-863057	-862944	-867612
0.55	-863443	-864983	-865242
0.56	-864585	-862106	-865334
0.57	-862267	-864804	-865021
0.58	-860657	-866618	-864404
0.59	-860319	-865168	-864396
0.6	-861665	-863199	-867265
0.61	-863052	-865361	-865934
0.62	-861063	-862386	-866864
0.63	-860535	-862800	-867687
0.64	-861033	-865275	-865537
0.65	-861316	-862366	-867289
0.66	-860611	-863069	-867803
0.67	-862340	-864488	-866586
0.68	-858918	-865385	-865401
0.69	-862928	-865214	-866190
0.7	-862317	-865234	-865517
0.71	-859272	-863052	-863863
0.72	-864853	-867109	-864279
0.73	-860846	-864735	-866918
0.74	-860113	-864298	-867116
0.75	-863007	-865121	-866426
0.76	-862168	-866055	-867170
0.77	-861371	-862380	-865542
0.78	-863899	-863984	-867879
0.79	-860609	-864687	-864081
0.8	-859594	-864963	-865761
0.81	-860330	-866473	-867642
0.82	-861200	-864521	-865644
0.83	-861560	-864619	-865695
0.84	-862123	-867470	-866505
0.85	-862956	-865297	-866771
0.86	-859166	-864840	-864513
0.87	-860855	-865276	-865193
0.88	-862337	-865699	-864674
0.89	-863413	-865144	-867641
0.9	-864908	-866688	-867675
0.91	-861155	-862237	-867219
0.92	-859644	-865510	-867970
0.93	-861536	-865528	-865785
0.94	-862291	-864462	-865559
0.95	-862292	-864317	-866276
0.96	-859805	-866748	-865488
0.97	-860346	-865520	-864696
0.98	-863697	-864487	-867745
0.99	-862168	-863492	-866393
1	-863033	-865786	-868554
1.01	-862923	-863346	-868628
1.02	-859503	-865518	-867107
1.03	-861839	-864234	-867178
1.04	-859994	-867208	-867501
1.05	-861449	-862467	-868606
1.06	-862630	-863548	-866047
1.07	-862008	-860980	-866523
1.08	-860895	-867474	-865777
1.09	-862978	-864122	-866561
1.1	-860972	-864016	-869005
1.11	-861070	-862219	-867574
1.12	-860271	-863045	-867181
1.13	-861475	-862614	-863211
1.14	-861160	-865311	-866718
1.15	-861336	-863068	-866358
1.16	-864045	-863685	-867627
1.17	-862912	-863094	-864942
1.18	-863021	-861327	-864457
1.19	-861186	-862630	-864806
1.2	-862846	-863435	-867297
1.21	-863048	-868420	-867907
1.22	-860585	-866501	-862946
1.23	-863336	-863614	-865196
1.24	-862659	-868086	-865525
1.25	-862154	-865448	-867234
1.26	-862221	-867434	-866167
1.27	-861898	-865797	-868385
1.28	-862396	-867767	-868512
1.29	-861186	-863257	-867446
1.3	-860521	-865010	-863905
1.31	-863864	-864514	-865509
1.32	-864529	-864268	-868515
1.33	-861428	-863482	-864873
1.34	-859537	-863451	-865745
1.35	-862131	-863540	-866628
1.36	-863391	-866554	-865772
1.37	-862050	-865111	-867863
1.38	-859321	-864627	-867360
1.39	-859540	-864641	-866628
1.4	-859880	-864298	-864867
1.41	-862488	-864872	-868350
1.42	-861601	-863097	-865158
1.43	-861988	-863476	-867176
1.44	-863248	-864572	-865994
1.45	-863104	-864609	-865156
1.46	-863071	-860604	-865431
1.47	-859964	-863046	-868320
1.48	-861086	-866096	-866083
1.49	-861471	-864279	-866883
1.5	-862365	-862794	-864467
1.51	-863295	-862957	-867472
1.52	-861256	-864810	-863846
1.53	-865709	-865970	-865383
1.54	-862979	-862081	-866789
1.55	-865766	-864423	-865135
1.56	-862581	-865311	-865626
1.57	-861650	-865517	-866305
1.58	-861843	-864499	-867386
1.59	-861630	-866577	-866227
1.6	-861324	-863907	-868196
1.61	-862342	-860127	-865592
1.62	-862786	-867003	-867035
1.63	-862134	-865324	-867054
1.64	-862946	-865059	-866956
1.65	-859155	-865485	-866479
1.66	-860027	-864130	-867707
1.67	-860452	-866510	-869480
1.68	-863000	-865801	-864887
1.69	-862488	-864868	-866125
1.7	-858292	-864472	-867456
1.71	-863249	-866340	-865815
1.72	-865869	-867034	-865917
1.73	-861384	-864711	-868308
1.74	-864899	-865665	-865386
1.75	-861239	-866134	-864220
1.76	-861070	-866211	-866528
1.77	-859472	-863652	-863938
1.78	-863033	-863300	-867126
1.79	-865306	-862868	-865828
1.8	-861216	-862577	-864607
1.81	-860301	-865616	-868358
1.82	-860610	-863456	-868085
1.83	-861560	-864360	-865723
1.84	-862399	-864256	-865716
1.85	-862284	-864120	-866018
1.86	-862974	-865098	-866752
1.87	-864490	-866154	-867753
1.88	-861165	-862445	-863354
1.89	-862868	-864751	-867474
1.9	-863757	-861808	-866700
1.91	-862636	-864150	-867155
1.92	-861625	-864546	-865448
1.93	-864285	-865337	-864302
1.94	-862340	-863407	-865168
1.95	-864669	-864604	-864319
1.96	-863430	-866229	-867374
1.97	-862341	-863588	-868561
1.98	-862610	-863656	-866522
1.99	-862980	-865056	-867610
2	-863950	-866276	-864751
2.01	-864270	-863648	-865998
2.02	-861142	-864592	-864726
2.03	-860934	-865110	-865826
2.04	-861995	-864282	-866414
2.05	-863283	-864893	-869436
2.06	-862170	-863540	-864838
2.07	-861230	-866006	-866356
2.08	-859973	-864340	-865826
2.09	-861648	-863771	-869597
2.1	-861086	-861989	-867964
2.11	-861207	-864016	-866794
2.12	-861940	-864372	-867174
2.13	-863415	-863565	-865289
2.14	-863867	-865319	-867789
2.15	-861841	-865918	-867011
2.16	-863202	-864697	-864889
2.17	-861254	-862051	-867146
2.18	-863382	-866712	-867990
2.19	-859883	-862987	-865943
2.2	-861276	-863847	-866790
2.21	-860583	-862365	-867068
2.22	-861040	-867396	-867511
2.23	-861493	-865426	-866764
2.24	-862922	-863924	-866498
2.25	-860961	-865774	-866951
2.26	-861668	-862901	-869050
2.27	-862475	-867166	-868595
2.28	-862226	-865406	-866620
2.29	-862815	-868435	-867617
2.3	-861211	-864628	-866970
2.31	-862550	-864576	-869078
2.32	-859322	-862947	-863835
2.33	-861239	-864158	-863943
2.34	-861678	-865093	-867217
2.35	-861348	-865854	-869233
2.36	-861888	-864487	-863919
2.37	-861605	-864541	-866732
2.38	-860588	-866405	-864500
2.39	-865364	-865930	-867101
2.4	-863515	-866110	-864687
2.41	-859862	-864492	-863691
2.42	-861819	-866851	-866060
2.43	-860596	-866213	-867771
2.44	-864208	-865353	-867829
2.45	-864446	-866476	-865413
2.46	-858759	-862467	-868143
2.47	-860618	-864600	-866691
2.48	-860841	-863258	-869171
2.49	-863452	-868373	-867533
2.5	-862326	-864869	-864640
2.51	-862712	-867063	-867461
2.52	-862423	-864721	-865246
2.53	-860502	-864595	-865660
2.54	-862339	-861238	-866522
2.55	-860776	-864609	-868514
2.56	-862095	-867626	-867347
2.57	-861586	-864477	-867394
2.58	-862137	-864890	-867538
2.59	-861972	-864792	-865851
2.6	-861522	-866999	-868030
2.61	-863314	-867696	-865448
2.62	-860904	-865705	-864395
2.63	-861195	-864891	-868076
2.64	-864347	-863460	-864441
2.65	-861690	-864251	-864597
2.66	-862296	-865533	-866626
2.67	-863293	-864558	-865461
2.68	-860526	-865006	-867152
2.69	-861756	-862995	-865716
2.7	-861473	-867126	-865059
2.71	-861092	-865065	-865278
2.72	-860860	-862426	-867716
2.73	-861378	-865165	-865774
2.74	-862202	-865636	-867359
2.75	-858735	-865924	-866549
2.76	-861834	-863401	-865232
2.77	-862810	-865301	-867878
2.78	-862359	-863980	-866751
2.79	-860459	-864614	-864371
2.8	-859767	-865898	-867631
2.81	-864648	-863532	-866310
2.82	-862152	-863192	-865543
2.83	-861467	-866200	-866626
2.84	-860906	-864799	-864508
2.85	-862987	-864124	-864422
2.86	-861692	-864055	-868765
2.87	-864209	-862276	-865946
2.88	-865937	-866973	-866919
2.89	-862441	-865787	-868015
2.9	-860574	-867338	-863629
2.91	-862348	-865999	-868239
2.92	-863030	-864257	-867904
2.93	-863309	-863427	-865463
2.94	-860214	-864577	-865440
2.95	-863220	-860674	-866296
2.96	-860739	-863794	-866258
2.97	-864752	-862958	-865926
2.98	-864034	-865929	-867814
2.99	-862905	-865964	-865581
3	-861883	-865736	-867532
3.01	-860875	-864372	-868520
3.02	-862186	-865976	-865769
3.03	-861616	-866575	-864038
3.04	-863333	-863263	-867990
3.05	-858804	-868032	-865927
3.06	-860819	-863926	-869007
3.07	-860673	-866495	-865900
3.08	-864224	-866806	-866098
3.09	-863871	-864137	-867381
3.1	-863193	-866189	-867772
3.11	-860852	-863289	-865884
3.12	-863439	-865355	-866405
3.13	-862653	-866885	-865123
3.14	-862903	-863056	-865927
3.15	-863779	-863775	-867400
3.16	-863183	-865395	-867288
3.17	-860367	-864375	-866111
3.18	-862702	-864439	-865530
3.19	-861286	-866541	-866726
3.2	-864404	-864959	-866752
3.21	-864021	-863311	-864800
3.22	-859994	-862217	-868239
3.23	-862620	-864867	-867201
3.24	-863726	-866185	-865953
3.25	-861803	-865016	-865917
3.26	-863794	-863919	-867712
3.27	-862521	-862699	-866535
3.28	-860626	-867187	-865953
3.29	-861210	-866080	-869036
3.3	-860930	-861684	-867402
3.31	-864373	-865595	-866936
3.32	-863840	-864174	-865128
3.33	-865656	-864284	-866925
3.34	-863738	-864733	-864804
3.35	-861039	-866402	-864277
3.36	-860479	-861048	-867466
3.37	-859925	-865791	-866884
3.38	-862591	-867985	-866728
3.39	-861208	-866594	-865562
3.4	-861155	-865272	-866524
3.41	-862619	-866033	-864944
3.42	-860719	-862012	-867116
3.43	-863128	-862787	-864900
3.44	-862112	-865688	-868086
3.45	-860370	-863073	-866961
3.46	-864070	-865138	-866274
3.47	-861035	-863452	-867520
3.48	-859069	-864245	-864357
3.49	-861296	-863370	-865634
3.5	-863045	-865471	-867490
3.51	-860746	-865884	-867967
3.52	-865340	-865048	-868731
3.53	-860795	-864983	-865741
3.54	-862686	-867066	-863654
3.55	-860329	-863209	-866759
3.56	-863922	-865064	-867778
3.57	-861756	-866362	-864817
3.58	-862226	-864226	-865494
3.59	-863462	-862199	-867232
3.6	-862162	-864538	-865042
3.61	-862886	-865310	-866278
3.62	-861721	-864487	-865365
3.63	-862941	-867661	-865828
3.64	-863617	-868470	-867372
3.65	-862006	-864190	-867838
3.66	-859239	-863958	-865456
3.67	-862174	-863289	-867787
3.68	-861122	-867117	-864190
3.69	-863458	-865749	-864745
3.7	-863405	-864950	-863624
3.71	-860912	-864361	-867668
3.72	-862565	-865076	-866565
3.73	-860876	-865856	-867385
3.74	-862929	-865251	-866302
3.75	-864306	-865983	-866365
3.76	-863491	-866044	-867155
3.77	-861937	-866255	-866061
3.78	-863563	-863848	-868393
3.79	-863041	-866124	-865738
3.8	-861627	-865552	-869569
3.81	-863655	-865464	-867244
3.82	-862450	-866235	-866623
3.83	-861579	-865227	-868573
3.84	-862331	-865378	-866028
3.85	-860953	-865174	-866861
3.86	-864206	-864830	-867972
3.87	-862003	-865362	-867693
3.88	-860132	-863782	-867456
3.89	-863907	-864109	-868889
3.9	-861186	-864567	-866502
3.91	-860184	-865495	-864572
3.92	-861501	-864324	-862491
3.93	-863084	-866247	-867931
3.94	-862761	-862058	-867235
3.95	-863478	-865698	-866691
3.96	-861424	-864998	-868829
3.97	-861344	-866656	-865973
3.98	-860680	-866336	-865955
3.99	-861385	-866515	-864820
4	-860534	-864802	-866929
4.01	-861939	-862307	-866054
4.02	-862034	-867392	-866824
4.03	-861344	-864464	-867005
4.04	-862836	-862604	-863405
4.05	-860560	-863017	-866929
4.06	-861809	-867416	-867463
4.07	-863883	-863386	-867959
4.08	-862163	-863991	-866666
4.09	-861527	-866525	-864638
4.1	-862677	-864854	-865752
4.11	-863055	-863946	-863273
4.12	-861848	-863533	-865293
4.13	-862743	-866142	-867409
4.14	-864321	-863546	-867001
4.15	-861278	-864579	-866014
4.16	-861606	-863334	-866148
4.17	-858623	-866043	-864896
4.18	-861125	-865822	-864775
4.19	-860319	-863796	-867960
4.2	-862797	-866318	-866150
4.21	-860442	-865243	-865887
4.22	-860959	-864241	-867543
4.23	-860782	-864794	-867766
4.24	-863461	-867028	-865643
4.25	-863628	-864147	-864073
4.26	-861947	-863380	-865831
4.27	-863485	-863182	-866792
4.28	-862105	-863941	-863650
4.29	-860006	-866347	-865888
4.3	-861286	-864428	-863178
4.31	-863501	-866532	-868029
4.32	-862423	-865263	-866996
4.33	-864027	-865575	-868541
4.34	-862526	-863939	-867745
4.35	-862668	-869080	-866856
4.36	-860117	-863513	-868539
4.37	-864462	-865864	-867296
4.38	-861084	-866269	-867521
4.39	-863233	-861395	-867763
4.4	-864184	-863885	-868291
4.41	-862516	-865786	-866506
4.42	-862688	-863315	-866312
4.43	-863384	-865707	-864408
4.44	-862602	-866293	-869028
4.45	-862180	-865146	-867758
4.46	-862522	-863141	-868405
4.47	-861853	-866926	-867641
4.48	-860488	-865304	-865788
4.49	-862928	-867151	-865751
4.5	-861997	-865710	-867685
4.51	-862309	-863474	-867620
4.52	-861691	-862764	-865851
4.53	-861268	-867126	-867769
4.54	-861594	-864393	-867664
4.55	-861087	-866047	-866061
4.56	-861550	-867478	-865173
4.57	-864611	-865444	-864759
4.58	-861826	-864411	-867225
4.59	-864097	-864081	-868263
4.6	-864503	-863834	-866180
4.61	-863335	-863885	-865633
4.62	-859876	-864031	-867150
4.63	-864282	-863838	-865535
4.64	-863248	-864561	-866912
4.65	-860756	-863275	-865532
4.66	-862741	-863294	-864459
4.67	-861837	-863447	-867341
4.68	-863355	-865397	-869009
4.69	-862531	-865244	-867970
4.7	-862852	-865915	-864520
4.71	-860654	-863152	-867912
4.72	-858859	-866626	-865963
4.73	-863889	-867213	-866766
4.74	-859584	-865838	-864026
4.75	-860757	-865346	-868728
4.76	-862952	-863725	-869707
4.77	-861761	-864191	-867237
4.78	-862442	-864992	-866663
4.79	-860681	-864224	-867245
4.8	-862978	-865219	-866196
4.81	-860280	-864583	-867264
4.82	-861755	-864710	-865791
4.83	-863441	-864904	-866224
4.84	-863412	-864057	-867138
4.85	-862473	-866331	-868286
4.86	-864747	-866513	-865904
4.87	-864269	-866096	-866910
4.88	-862444	-867557	-867373
4.89	-861990	-866795	-864728
4.9	-861078	-866890	-867997
4.91	-863105	-865008	-866747
4.92	-862410	-866343	-867443
4.93	-861467	-865204	-867253
4.94	-862544	-864572	-867158
4.95	-861779	-866965	-865288
4.96	-863336	-865260	-864747
4.97	-860485	-865030	-865742
4.98	-863570	-865517	-867979
4.99	-863101	-863366	-868696
5	-863562	-864514	-867567
5.01	-863036	-864158	-867536
5.02	-860893	-866821	-868570
5.03	-860928	-864771	-869139
5.04	-862020	-866637	-870859
5.05	-860327	-867514	-868593
5.06	-860501	-863352	-866721
5.07	-860196	-864189	-867768
5.08	-863158	-860712	-865953
5.09	-864669	-864454	-869641
5.1	-863896	-865660	-865662
5.11	-861927	-864592	-868980
5.12	-863802	-865038	-865655
5.13	-862424	-867694	-864451
5.14	-861603	-865450	-865120
5.15	-862097	-864578	-866051
5.16	-861912	-866453	-868816
5.17	-861944	-869262	-868275
5.18	-860758	-863756	-867406
5.19	-860183	-864984	-870068
5.2	-861877	-866692	-867607
5.21	-862523	-863732	-867222
5.22	-862380	-864527	-864931
5.23	-862869	-865207	-867008
5.24	-861189	-864089	-867342
5.25	-862167	-867740	-866060
5.26	-863932	-865165	-865658
5.27	-861634	-864247	-866693
5.28	-861792	-866230	-864360
5.29	-863025	-866208	-865603
5.3	-862639	-864875	-866587
5.31	-861041	-865395	-864858
5.32	-861214	-867518	-866923
5.33	-862983	-867036	-863302
5.34	-861123	-863742	-867342
5.35	-859733	-864427	-864966
5.36	-863548	-865953	-866601
5.37	-862514	-866727	-866502
5.38	-861221	-867504	-870000
5.39	-862212	-865445	-867352
5.4	-864261	-863473	-869597
5.41	-864804	-866266	-866968
5.42	-861199	-866625	-865417
5.43	-862660	-864163	-866950
5.44	-860989	-860795	-868721
5.45	-862930	-867711	-869623
5.46	-863824	-865161	-865865
5.47	-862176	-865446	-867703
5.48	-862320	-863886	-867601
5.49	-864518	-866220	-867495
5.5	-862247	-864960	-868369
5.51	-861307	-865355	-867541
5.52	-861591	-862327	-867878
5.53	-861104	-865580	-866184
5.54	-862562	-863835	-866577
5.55	-866733	-866988	-866618
5.56	-860647	-867250	-869664
5.57	-860110	-867651	-863583
5.58	-860813	-865911	-865993
5.59	-861417	-864853	-867059
5.6	-862003	-864636	-865097
5.61	-860886	-863094	-863767
5.62	-859562	-864163	-867282
5.63	-864175	-861433	-866499
5.64	-861551	-864688	-866004
5.65	-863438	-863481	-865198
5.66	-861974	-865793	-866233
5.67	-860900	-864854	-867949
5.68	-862724	-866455	-866221
5.69	-861550	-865256	-867820
5.7	-862181	-865665	-866659
5.71	-861593	-865949	-867803
5.72	-865856	-866896	-867024
5.73	-862967	-863857	-863531
5.74	-860107	-864093	-865645
5.75	-864761	-864193	-867506
5.76	-863283	-864657	-871417
5.77	-864907	-866725	-869530
5.78	-861441	-864627	-866492
5.79	-861102	-865223	-868502
5.8	-865178	-865749	-866942
5.81	-861705	-863043	-867905
5.82	-861743	-866964	-870305
5.83	-863858	-861819	-866677
5.84	-861825	-864750	-866432
5.85	-860945	-866634	-867220
5.86	-862300	-863430	-866752
5.87	-863364	-864361	-866560
5.88	-861944	-864548	-868275
5.89	-863307	-866391	-866812
5.9	-863173	-864666	-868519
5.91	-863378	-864340	-867087
5.92	-860252	-865870	-865122
5.93	-862418	-864925	-866310
5.94	-861580	-864662	-865796
5.95	-861052	-863477	-868433
5.96	-860698	-863755	-866222
5.97	-862346	-864388	-866770
5.98	-861161	-864490	-866143
5.99	-861830	-865322	-865014
6	-862506	-863810	-864952
6.01	-861110	-864754	-863405
6.02	-862422	-862886	-867008
6.03	-859589	-866284	-867239
6.04	-864048	-868360	-866700
6.05	-860890	-861918	-866276
6.06	-861821	-864217	-866966
6.07	-862711	-862080	-867224
6.08	-864240	-866100	-866550
6.09	-865294	-865246	-866497
6.1	-865374	-864679	-865582
6.11	-862804	-867616	-865561
6.12	-861535	-864990	-864588
6.13	-861338	-864800	-865886
6.14	-864178	-865754	-866482
6.15	-860460	-865592	-868150
6.16	-860253	-865198	-865887
6.17	-862268	-864820	-866257
6.18	-862246	-866158	-869120
6.19	-860731	-866480	-866794
6.2	-861434	-867452	-864093
6.21	-863012	-863551	-867317
6.22	-863091	-862837	-866001
6.23	-863712	-867105	-865918
6.24	-862896	-863381	-866444
6.25	-863567	-863244	-866870
6.26	-863874	-865018	-867423
6.27	-863672	-865405	-866560
6.28	-862308	-866860	-866708
6.29	-863980	-867699	-866180
6.3	-862864	-863701	-867510
6.31	-861895	-867254	-866705
6.32	-862382	-867696	-867243
6.33	-859355	-866748	-867515
6.34	-862312	-863345	-871436
6.35	-862382	-863466	-867557
6.36	-862248	-865007	-865128
6.37	-860977	-863495	-868031
6.38	-863678	-864985	-866476
6.39	-861068	-866032	-866982
6.4	-862161	-863591	-863936
6.41	-862598	-866701	-867684
6.42	-863065	-863594	-866197
6.43	-864319	-865410	-866810
6.44	-862883	-866875	-865434
6.45	-863929	-865232	-863693
6.46	-862467	-864841	-866496
6.47	-863110	-864900	-866193
6.48	-864241	-864144	-869010
6.49	-863647	-865048	-867102
6.5	-862104	-863475	-867267
6.51	-861654	-866071	-864579
6.52	-864771	-864632	-865609
6.53	-863767	-867004	-866176
6.54	-862677	-866512	-870086
6.55	-862426	-865606	-866934
6.56	-860562	-865810	-864886
6.57	-862263	-867598	-867095
6.58	-862597	-865414	-866993
6.59	-861086	-864328	-868444
6.6	-862676	-862482	-867090
6.61	-860718	-865996	-867879
6.62	-861324	-863413	-865320
6.63	-862369	-864614	-869067
6.64	-861179	-865980	-867503
6.65	-863248	-864999	-867698
6.66	-862255	-864428	-864464
6.67	-863281	-864148	-870025
6.68	-864226	-864144	-866474
6.69	-864526	-865288	-866398
6.7	-860722	-863918	-864861
6.71	-863668	-865643	-866030
6.72	-863243	-864104	-868071
6.73	-863500	-865910	-869198
6.74	-860983	-866737	-868760
6.75	-861459	-865956	-867970
6.76	-863683	-866604	-867314
6.77	-863565	-865288	-867587
6.78	-859985	-866567	-865760
6.79	-862984	-863648	-866219
6.8	-860874	-865845	-868031
6.81	-863529	-864327	-869128
6.82	-861951	-867272	-867002
6.83	-860750	-865459	-866998
6.84	-861561	-867469	-869873
6.85	-862487	-865991	-866842
6.86	-863027	-862354	-865545
6.87	-864454	-866980	-866536
6.88	-862994	-865261	-866777
6.89	-863879	-863462	-865925
6.9	-862674	-865282	-867444
6.91	-861320	-866234	-867126
6.92	-861636	-863548	-867452
6.93	-863993	-867075	-866504
6.94	-860754	-864260	-865302
6.95	-862734	-864738	-865821
6.96	-862656	-865897	-866070
6.97	-860750	-864343	-865521
6.98	-863301	-865177	-865610
6.99	-864063	-862132	-864347
7	-861436	-865255	-865795
7.01	-861525	-864692	-865722
7.02	-864025	-866666	-866758
7.03	-863108	-862992	-867404
7.04	-863182	-867122	-866949
7.05	-862552	-865932	-867264
7.06	-860473	-862535	-867462
7.07	-859454	-863626	-869746
7.08	-860424	-862654	-868282
7.09	-862717	-866798	-866876
7.1	-860088	-868390	-864970
7.11	-860962	-862767	-867802
7.12	-864743	-867868	-864878
7.13	-861902	-866612	-866909
7.14	-866223	-866998	-866598
7.15	-861838	-866619	-863214
7.16	-863067	-865173	-867882
7.17	-863502	-869456	-866103
7.18	-861482	-867949	-866734
7.19	-861356	-866528	-868945
7.2	-863493	-862851	-866705
7.21	-864760	-865020	-864245
7.22	-863354	-863268	-866345
7.23	-863017	-865400	-865111
7.24	-862010	-865143	-865680
7.25	-863497	-864733	-865899
7.26	-860927	-864264	-866117
7.27	-862068	-865957	-866232
7.28	-861472	-864453	-867289
7.29	-863796	-865764	-866806
7.3	-862972	-866210	-868728
7.31	-860928	-867163	-866528
7.32	-862570	-865177	-867477
7.33	-866850	-865093	-867626
7.34	-862047	-865150	-864690
7.35	-861457	-865736	-867328
7.36	-863701	-864437	-867639
7.37	-862735	-868596	-868696
7.38	-861581	-867634	-867030
7.39	-862296	-863226	-866778
7.4	-861161	-867765	-866186
7.41	-863564	-864244	-866816
7.42	-863705	-866100	-866351
7.43	-863466	-866922	-864154
7.44	-863534	-865316	-868969
7.45	-863700	-863664	-865700
7.46	-861049	-864873	-867748
7.47	-857728	-864153	-865680
7.48	-863424	-863911	-866077
7.49	-862330	-863988	-868969
7.5	-863021	-863699	-865765
7.51	-862171	-861325	-869336
7.52	-865121	-863643	-868412
7.53	-863538	-866004	-866573
7.54	-862786	-866323	-866754
7.55	-861173	-863936	-868404
7.56	-862528	-863741	-865851
7.57	-864461	-864499	-867842
7.58	-863248	-863833	-866776
7.59	-863030	-866529	-865893
7.6	-864251	-866988	-865217
7.61	-863620	-865681	-869087
7.62	-861867	-865297	-865678
7.63	-863471	-864115	-867721
7.64	-863559	-863140	-867547
7.65	-861908	-867945	-866658
7.66	-862016	-867319	-867366
7.67	-862894	-863477	-867349
7.68	-861004	-865365	-868124
7.69	-866569	-863810	-868380
7.7	-861802	-865276	-864671
7.71	-863335	-865986	-868427
7.72	-863141	-865240	-867432
7.73	-862363	-865335	-866917
7.74	-863327	-865308	-866090
7.75	-863650	-866260	-865015
7.76	-859900	-863830	-868997
7.77	-863170	-866481	-865265
7.78	-862102	-864368	-866488
7.79	-862379	-863833	-865744
7.8	-861572	-866187	-866990
7.81	-860282	-864723	-868490
7.82	-862209	-864470	-868806
7.83	-864440	-862981	-868348
7.84	-862620	-863420	-866490
7.85	-862317	-864130	-866310
7.86	-862025	-865663	-867140
7.87	-862666	-865470	-863532
7.88	-862534	-868186	-867331
7.89	-860978	-865775	-869305
7.9	-860186	-864234	-868028
7.91	-865715	-864041	-869388
7.92	-863368	-863530	-867399
7.93	-862971	-865399	-865600
7.94	-861536	-862542	-865541
7.95	-860453	-865774	-866952
7.96	-863013	-864570	-864169
7.97	-863345	-863233	-867928
7.98	-862741	-864581	-868594
7.99	-861746	-866677	-866555
8	-861093	-864868	-868031
8.01	-859559	-868669	-866756
8.02	-864216	-865919	-868116
8.03	-865816	-867715	-866615
8.04	-861773	-864776	-866026
8.05	-863174	-865916	-866236
8.06	-863269	-863061	-867469
8.07	-862816	-863534	-865587
8.08	-865305	-865864	-868472
8.09	-861309	-864437	-866739
8.1	-866446	-865197	-867441
8.11	-862310	-865304	-867169
8.12	-861222	-863612	-866060
8.13	-863597	-862769	-866345
8.14	-860633	-864360	-869286
8.15	-862547	-866530	-865868
8.16	-861881	-866756	-865604
8.17	-861871	-865252	-864063
8.18	-861306	-865739	-868227
8.19	-861783	-862484	-867308
8.2	-863646	-865848	-868623
8.21	-858854	-866232	-870609
8.22	-862419	-864538	-865041
8.23	-861654	-864822	-866448
8.24	-862700	-865718	-868411
8.25	-860561	-865753	-869185
8.26	-864426	-865362	-866490
8.27	-860804	-866564	-866250
8.28	-861899	-865031	-864928
8.29	-862488	-864265	-867717
8.3	-861761	-863310	-869148
8.31	-865226	-862880	-867512
8.32	-860961	-865174	-865868
8.33	-863834	-864152	-865523
8.34	-863516	-863325	-868844
8.35	-863678	-866702	-869823
8.36	-863763	-864989	-867257
8.37	-860937	-863046	-866512
8.38	-861711	-864462	-864928
8.39	-864046	-866679	-864942
8.4	-863595	-863264	-866902
8.41	-864666	-865408	-868568
8.42	-861157	-863477	-868490
8.43	-860172	-864796	-865754
8.44	-861210	-862673	-867130
8.45	-862990	-866220	-869498
8.46	-862936	-866795	-865995
8.47	-863211	-865545	-869308
8.48	-862232	-863513	-867857
8.49	-861976	-866798	-870400
8.5	-864985	-867050	-866366
8.51	-862044	-861649	-869709
8.52	-862204	-865344	-866142
8.53	-863649	-864953	-867117
8.54	-863950	-864814	-866208
8.55	-859502	-867734	-865422
8.56	-861505	-866645	-868508
8.57	-863903	-865346	-866926
8.58	-861689	-861833	-866084
8.59	-861411	-864506	-865565
8.6	-860275	-863262	-869217
8.61	-863434	-864387	-868006
8.62	-863624	-863423	-869422
8.63	-861937	-863230	-867105
8.64	-862131	-862904	-868750
8.65	-859700	-867269	-867185
8.66	-861447	-863978	-868667
8.67	-862001	-866667	-865808
8.68	-863197	-866980	-866390
8.69	-863396	-865089	-866086
8.7	-861580	-864224	-866821
8.71	-862740	-868090	-867006
8.72	-865025	-865286	-864641
8.73	-862868	-862956	-869133
8.74	-863628	-867135	-866964
8.75	-861937	-862825	-866078
8.76	-861714	-864732	-866862
8.77	-863307	-864657	-868792
8.78	-861773	-864824	-868898
8.79	-860700	-867189	-865540
8.8	-864540	-863603	-865809
8.81	-863920	-865382	-867092
8.82	-861427	-865694	-868624
8.83	-858870	-866618	-865874
8.84	-862338	-864367	-867784
8.85	-862013	-864270	-865751
8.86	-863188	-863484	-866979
8.87	-862914	-866323	-867682
8.88	-861748	-864992	-867052
8.89	-859829	-866387	-866187
8.9	-863565	-865247	-865670
8.91	-862729	-864570	-866687
8.92	-864227	-863703	-868212
8.93	-862087	-866965	-866056
8.94	-861155	-864498	-867131
8.95	-864527	-862982	-869624
8.96	-862483	-866274	-867230
8.97	-862404	-864466	-871452
8.98	-862599	-869441	-866719
8.99	-863108	-865704	-865987
9	-864778	-865891	-869141
9.01	-863326	-867549	-868024
9.02	-861540	-864796	-865045
9.03	-861560	-865542	-867234
9.04	-863023	-864274	-867803
9.05	-863248	-864360	-865235
9.06	-860994	-863401	-867958
9.07	-862317	-866855	-867516
9.08	-861399	-863682	-867424
9.09	-862361	-864130	-866732
9.1	-862440	-865658	-867614
9.11	-863454	-867076	-863955
9.12	-863304	-865163	-865869
9.13	-861133	-867059	-867315
9.14	-860956	-865311	-865821
9.15	-862012	-864797	-868723
9.16	-861426	-863567	-869737
9.17	-860734	-866727	-867294
9.18	-860307	-864635	-868866
9.19	-862690	-864895	-866823
9.2	-862416	-865182	-867456
9.21	-859951	-866683	-869518
9.22	-861930	-866590	-867475
9.23	-861432	-865068	-865968
9.24	-863261	-865185	-864985
9.25	-860238	-865293	-867717
9.26	-859433	-867740	-866438
9.27	-860666	-864116	-866674
9.28	-861004	-864882	-868982
9.29	-860337	-864322	-867063
9.3	-860535	-860908	-865026
9.31	-861355	-866171	-865426
9.32	-862780	-864095	-865862
9.33	-861556	-867028	-864675
9.34	-863557	-867283	-864114
9.35	-862281	-862300	-868349
9.36	-863757	-865688	-865488
9.37	-863763	-864613	-865054
9.38	-861602	-868057	-866676
9.39	-865040	-865474	-868358
9.4	-860737	-863897	-865859
9.41	-861781	-865274	-869399
9.42	-862434	-866360	-867265
9.43	-859845	-861429	-866138
9.44	-862996	-864475	-864854
9.45	-861208	-863548	-869054
9.46	-862930	-864555	-869436
9.47	-862033	-865839	-866003
9.48	-860383	-864344	-866992
9.49	-860731	-863727	-868707
9.5	-862588	-865761	-867708
9.51	-862454	-865019	-866140
9.52	-863225	-866077	-867328
9.53	-863014	-865651	-866969
9.54	-861798	-865871	-866064
9.55	-863914	-866387	-866761
9.56	-863082	-864760	-870014
9.57	-861818	-864887	-871957
9.58	-862586	-863940	-867069
9.59	-859382	-864498	-867119
9.6	-863631	-862115	-869352
9.61	-863957	-868180	-867449
9.62	-860619	-864055	-867223
9.63	-863263	-867366	-867235
9.64	-863401	-864969	-865459
9.65	-862995	-865336	-865996
9.66	-862456	-864914	-866329
9.67	-861187	-864079	-866290
9.68	-862846	-863638	-869955
9.69	-861172	-863358	-867180
9.7	-862972	-864206	-863714
9.71	-865735	-865046	-870383
9.72	-861642	-865015	-865440
9.73	-863544	-863696	-868008
9.74	-863891	-864343	-867421
9.75	-858923	-863851	-867414
9.76	-863090	-866609	-867390
9.77	-861314	-863366	-867634
9.78	-862508	-866806	-867614
9.79	-863921	-864870	-867496
9.8	-861689	-864318	-866154
9.81	-865314	-865327	-865459
9.82	-860680	-865579	-865310
9.83	-865217	-866558	-868591
9.84	-864640	-864666	-867229
9.85	-861420	-864534	-870942
9.86	-861758	-864854	-865154
9.87	-860805	-868020	-865772
9.88	-865236	-866646	-869289
9.89	-860280	-863600	-865989
9.9	-864822	-864018	-868566
9.91	-861959	-863049	-866868
9.92	-865215	-866784	-867484
9.93	-861146	-863419	-866941
9.94	-863016	-864888	-866688
9.95	-860783	-867105	-867336
9.96	-862089	-865121	-869817
9.97	-865707	-866476	-867492
9.98	-862109	-865782	-865684
9.99	-862119	-867569	-865498
10	-863125	-865767	-869962
10.01	-863884	-863579	-868523
10.02	-861610	-867716	-865512
10.03	-863415	-866396	-865769
10.04	-862057	-865920	-865791
10.05	-864987	-867675	-870439
10.06	-865895	-862732	-864374
10.07	-861321	-865636	-867644
10.08	-863419	-861625	-866422
10.09	-862149	-864712	-867716
10.1	-860636	-865054	-866475
10.11	-863186	-863407	-866024
10.12	-861205	-864920	-864873
10.13	-861446	-865749	-865570
10.14	-862117	-867254	-865504
10.15	-861437	-864333	-866507
10.16	-862216	-863393	-867940
10.17	-862596	-864852	-867002
10.18	-861622	-867788	-866634
10.19	-858423	-865419	-864600
10.2	-861309	-865098	-867720
10.21	-863695	-864997	-865059
10.22	-860874	-867690	-866974
10.23	-863360	-862883	-867424
10.24	-863897	-866665	-868172
10.25	-860269	-865400	-868591
10.26	-862711	-866371	-869804
10.27	-861479	-866255	-867418
10.28	-860061	-866197	-868588
10.29	-862482	-866827	-865756
10.3	-863494	-862982	-866998
10.31	-859612	-866472	-866110
10.32	-860394	-862304	-871168
10.33	-862151	-864418	-867874
10.34	-861186	-867574	-866467
10.35	-864742	-862058	-866473
10.36	-861689	-861626	-868596
10.37	-864688	-863029	-865468
10.38	-862331	-866248	-865028
10.39	-862971	-864867	-863924
10.4	-864517	-861469	-866247
10.41	-861186	-866312	-866250
10.42	-860231	-866823	-867118
10.43	-863607	-864261	-865996
10.44	-862665	-866864	-865124
10.45	-861316	-865119	-867150
10.46	-862282	-863829	-866705
10.47	-863549	-865372	-867387
10.48	-863981	-864100	-868730
10.49	-862026	-863664	-862852
10.5	-860880	-863446	-866145
10.51	-860326	-866102	-870437
10.52	-863110	-864502	-864684
10.53	-862536	-864414	-866653
10.54	-861467	-864617	-865940
10.55	-862088	-865955	-865914
10.56	-863018	-864592	-868017
10.57	-863494	-865895	-866007
10.58	-861958	-864271	-867890
10.59	-863308	-867428	-866496
10.6	-861908	-865027	-868073
10.61	-859874	-865725	-868812
10.62	-862852	-864242	-867696
10.63	-861062	-863928	-864920
10.64	-861398	-866754	-867106
10.65	-863705	-865660	-868556
10.66	-864535	-867015	-867454
10.67	-864336	-863586	-865455
10.68	-860906	-865118	-865376
10.69	-861827	-864020	-867757
10.7	-862127	-864947	-866819
10.71	-860739	-862111	-865894
10.72	-862500	-867031	-867449
10.73	-864668	-864293	-865781
10.74	-861419	-864640	-867966
10.75	-862907	-863843	-865000
10.76	-863282	-863919	-867792
10.77	-861710	-864517	-866528
10.78	-860494	-866120	-865546
10.79	-863430	-867159	-866312
10.8	-864341	-865250	-867061
10.81	-861796	-866998	-869626
10.82	-863209	-864403	-865833
10.83	-861034	-864373	-864588
10.84	-858971	-866975	-867574
10.85	-860482	-863570	-867258
10.86	-862599	-866247	-866092
10.87	-862698	-865048	-868340
10.88	-863882	-866307	-866502
10.89	-863026	-864738	-866447
10.9	-859890	-863678	-867732
10.91	-862235	-866691	-866313
10.92	-862062	-863340	-868596
10.93	-861419	-864990	-869130
10.94	-865997	-865657	-865302
10.95	-860994	-866173	-867605
10.96	-863568	-864794	-865374
10.97	-860535	-863952	-867292
10.98	-862014	-863878	-867343
10.99	-859811	-866051	-867644
11	-863164	-864893	-867950
11.01	-860830	-864765	-866537
11.02	-863404	-864217	-868658
11.03	-864087	-864878	-866721
11.04	-862851	-864800	-867458
11.05	-861291	-866812	-863519
11.06	-859765	-863975	-866216
11.07	-866414	-867369	-865920
11.08	-861807	-863291	-866630
11.09	-863713	-867292	-868339
11.1	-859793	-863230	-865727
11.11	-862260	-863773	-866564
11.12	-864824	-865739	-868186
11.13	-860420	-865416	-864142
11.14	-864705	-866790	-867307
11.15	-863887	-866608	-866573
11.16	-865602	-866781	-870536
11.17	-862818	-863916	-868532
11.18	-863809	-864026	-870623
11.19	-863102	-868272	-867136
11.2	-860192	-864234	-866214
11.21	-863113	-863630	-866538
11.22	-860720	-862694	-868162
11.23	-863660	-865435	-866995
11.24	-862872	-864762	-865222
11.25	-862182	-863455	-865275
11.26	-864453	-865571	-868236
11.27	-861893	-867290	-869497
11.28	-863338	-864746	-866420
11.29	-862550	-864532	-866252
11.3	-863105	-863673	-866078
11.31	-862050	-865762	-866239
11.32	-864121	-864489	-864952
11.33	-862414	-865374	-866393
11.34	-862291	-864343	-867391
11.35	-862168	-866338	-869140
11.36	-864197	-863706	-865747
11.37	-865230	-865677	-865869
11.38	-864883	-867173	-867875
11.39	-863283	-865158	-867654
11.4	-861603	-864794	-868522
11.41	-864805	-864917	-867554
11.42	-862281	-866020	-865906
11.43	-864000	-862603	-867453
11.44	-861909	-867185	-864574
11.45	-860721	-863880	-868959
11.46	-860580	-867099	-866136
11.47	-861440	-866107	-866367
11.48	-859384	-865307	-867517
11.49	-864895	-864678	-866282
11.5	-862340	-862245	-869020
11.51	-860517	-864967	-867759
11.52	-862876	-863467	-867646
11.53	-864532	-862901	-865677
11.54	-859512	-865809	-870260
11.55	-863183	-863940	-866368
11.56	-862392	-865490	-867775
11.57	-862155	-864548	-867510
11.58	-860990	-864895	-865319
11.59	-860615	-867002	-867871
11.6	-859841	-867422	-868170
11.61	-862281	-867771	-867025
11.62	-862773	-862380	-864073
11.63	-862242	-864116	-868935
11.64	-863563	-865082	-865087
11.65	-861389	-863864	-867132
11.66	-863037	-863993	-866234
11.67	-862880	-864704	-871129
11.68	-860329	-864333	-869453
11.69	-861452	-864660	-866189
11.7	-861085	-863515	-869464
11.71	-863122	-863910	-866827
11.72	-861626	-865289	-864606
11.73	-863806	-864077	-866467
11.74	-862234	-864920	-867343
11.75	-863356	-864850	-866880
11.76	-862543	-862684	-865905
11.77	-860762	-865853	-864778
11.78	-860322	-865298	-868091
11.79	-861840	-863559	-868717
11.8	-861907	-865800	-868463
11.81	-862916	-867822	-866869
11.82	-861785	-866457	-868694
11.83	-863311	-865407	-866920
11.84	-863328	-864841	-868715
11.85	-862525	-867466	-868415
11.86	-859893	-865174	-867896
11.87	-862296	-864209	-866404
11.88	-859776	-867127	-866040
11.89	-864414	-862444	-868102
11.9	-860974	-865774	-868027
11.91	-861818	-863858	-867406
11.92	-863192	-862442	-865278
11.93	-861720	-866847	-868334
11.94	-860290	-865589	-868057
11.95	-860096	-865007	-866201
11.96	-862338	-865104	-866195
11.97	-862093	-865831	-866458
11.98	-863081	-866270	-867900
11.99	-861486	-867120	-865409
12	-863596	-862923	-866151
12.01	-860972	-865149	-866496
12.02	-861024	-867001	-869547
12.03	-859816	-863243	-866655
12.04	-862398	-865403	-866295
12.05	-862963	-865970	-866534
12.06	-862136	-864286	-868904
12.07	-860709	-866732	-867216
12.08	-865537	-867662	-866572
12.09	-862671	-864911	-868161
12.1	-866114	-866537	-868338
12.11	-863260	-864697	-864622
12.12	-861578	-864603	-868316
12.13	-861568	-865454	-867786
12.14	-862555	-863216	-866340
12.15	-862953	-866694	-866761
12.16	-862536	-865211	-866394
12.17	-860975	-865850	-865570
12.18	-862676	-864515	-866474
12.19	-865835	-864537	-866785
12.2	-861954	-866794	-867749
12.21	-864831	-866241	-867134
12.22	-863527	-863373	-865920
12.23	-865094	-864253	-865210
12.24	-862117	-866062	-866372
12.25	-860816	-864668	-866914
12.26	-861615	-867750	-868438
12.27	-862321	-865629	-866471
12.28	-861056	-866097	-866095
12.29	-860365	-865342	-866641
12.3	-861059	-865719	-867102
12.31	-864372	-866638	-867895
12.32	-863312	-866081	-866402
12.33	-861516	-864486	-866727
12.34	-861355	-866570	-866271
12.35	-860257	-864940	-867253
12.36	-861904	-864638	-868067
12.37	-864520	-863703	-867926
12.38	-862116	-866100	-868064
12.39	-863503	-864683	-867895
12.4	-864699	-865023	-868759
12.41	-861071	-865503	-865609
12.42	-861993	-863602	-866986
12.43	-861860	-866564	-866178
12.44	-859607	-866785	-868350
12.45	-863215	-864372	-867829
12.46	-864114	-864599	-867595
12.47	-862837	-862931	-866732
12.48	-861010	-864122	-868386
12.49	-862320	-867749	-866612
12.5	-862391	-863923	-865343
12.51	-862999	-863726	-867636
12.52	-861812	-863994	-866423
12.53	-861954	-864973	-870220
12.54	-862127	-867934	-869828
12.55	-860736	-866205	-867762
12.56	-860172	-863829	-866472
12.57	-862670	-867960	-867299
12.58	-865580	-863975	-867303
12.59	-862572	-865768	-868993
12.6	-861389	-866192	-865338
12.61	-861969	-864557	-868027
12.62	-863099	-863464	-865617
12.63	-864694	-862718	-866696
12.64	-864083	-864822	-867484
12.65	-863997	-868817	-867979
12.66	-863849	-869148	-868394
12.67	-860976	-865345	-866021
12.68	-863276	-864154	-867774
12.69	-865879	-867273	-869225
12.7	-863990	-863431	-866333
12.71	-860122	-861570	-866504
12.72	-863554	-866527	-866933
12.73	-863698	-864881	-866770
12.74	-861713	-864408	-866675
12.75	-863931	-864852	-867977
12.76	-861178	-862033	-868380
12.77	-862922	-863969	-864770
12.78	-862817	-865616	-868110
12.79	-862466	-867287	-867462
12.8	-860773	-864980	-866970
12.81	-860506	-862577	-867311
12.82	-862304	-865752	-866717
12.83	-863510	-866279	-868094
12.84	-863582	-865323	-868097
12.85	-861238	-863237	-866740
12.86	-862676	-865096	-866731
12.87	-863830	-865012	-868742
12.88	-861072	-865556	-866133
12.89	-860934	-865938	-867271
12.9	-861705	-864129	-867766
12.91	-861677	-863589	-866612
12.92	-864144	-864077	-866192
12.93	-859827	-863299	-866255
12.94	-861189	-865828	-865504
12.95	-863319	-864533	-866904
12.96	-862192	-866768	-868386
12.97	-862072	-863628	-864032
12.98	-863915	-865472	-870389
12.99	-862461	-866208	-867799
13	-861377	-864459	-866011
13.01	-864307	-868148	-866857
13.02	-864116	-863680	-865803
13.03	-863252	-863748	-867700
13.04	-862571	-863898	-868622
13.05	-859865	-864611	-866042
13.06	-861787	-862619	-869945
13.07	-863338	-862889	-868961
13.08	-863125	-864402	-864766
13.09	-862902	-863101	-867540
13.1	-863452	-866495	-867802
13.11	-861320	-864395	-865899
13.12	-863963	-865450	-864175
13.13	-863578	-865849	-867446
13.14	-862556	-862276	-868384
13.15	-862334	-866562	-869487
13.16	-862730	-865915	-868256
13.17	-861264	-866399	-865940
13.18	-861851	-864534	-868993
13.19	-860291	-867102	-866921
13.2	-865197	-866086	-866452
13.21	-862770	-865468	-868349
13.22	-860799	-865102	-867495
13.23	-864412	-863899	-869806
13.24	-861154	-865324	-868390
13.25	-860305	-865879	-866106
13.26	-863042	-866989	-867910
13.27	-861507	-864841	-868506
13.28	-861221	-864533	-870052
13.29	-863526	-868128	-869205
13.3	-863580	-865517	-868349
13.31	-862683	-864868	-866270
13.32	-862751	-863174	-870149
13.33	-859776	-864556	-866324
13.34	-863038	-866292	-870733
13.35	-860951	-864509	-869289
13.36	-863717	-865988	-865761
13.37	-863247	-868784	-865998
13.38	-865012	-864276	-866885
13.39	-861167	-865347	-867365
13.4	-862613	-863857	-868424
13.41	-861462	-862817	-863525
13.42	-861934	-865989	-866428
13.43	-862482	-867834	-867603
13.44	-863180	-866047	-868175
13.45	-864507	-866034	-865510
13.46	-861456	-865655	-866184
13.47	-861447	-865198	-867888
13.48	-864280	-865190	-868144
13.49	-862633	-864470	-868033
13.5	-862454	-864904	-866302
13.51	-862434	-866966	-866434
13.52	-865417	-864264	-864766
13.53	-861506	-868524	-869677
13.54	-860454	-866079	-866951
13.55	-862502	-864270	-866712
13.56	-863001	-867281	-864855
13.57	-859779	-863941	-869158
13.58	-860955	-866330	-869003
13.59	-862072	-865670	-867413
13.6	-859565	-865783	-866663
13.61	-859785	-865292	-869525
13.62	-861476	-866598	-870412
13.63	-860564	-864970	-867197
13.64	-862369	-863796	-867121
13.65	-862840	-865223	-869360
13.66	-861820	-863750	-868821
13.67	-862374	-862485	-864876
13.68	-862652	-863567	-867284
13.69	-862781	-864241	-868112
13.7	-861762	-865492	-867248
13.71	-863038	-864902	-867532
13.72	-860884	-866476	-865617
13.73	-860233	-864412	-869898
13.74	-861544	-866029	-866351
13.75	-862438	-866515	-867870
13.76	-863620	-865710	-870692
13.77	-865216	-863217	-868593
13.78	-859653	-865957	-867789
13.79	-859704	-863508	-866473
13.8	-865667	-865065	-864284
13.81	-863519	-864225	-865568
13.82	-863083	-865133	-864852
13.83	-863768	-862869	-866166
13.84	-863462	-866923	-869123
13.85	-861982	-864671	-866623
13.86	-861535	-862874	-867744
13.87	-863324	-863503	-865726
13.88	-863883	-863848	-868245
13.89	-861461	-863637	-866434
13.9	-859314	-865698	-867020
13.91	-860449	-865361	-867036
13.92	-865224	-865644	-868029
13.93	-860744	-865616	-869087
13.94	-863201	-865299	-868432
13.95	-861940	-864374	-869053
13.96	-862996	-866169	-867135
13.97	-863488	-866306	-865973
13.98	-861992	-865477	-869348
13.99	-861148	-866672	-865335
14	-862375	-865578	-865908
14.01	-861293	-864104	-870321
14.02	-863921	-864729	-867555
14.03	-862494	-866549	-869447
14.04	-860180	-861941	-867797
14.05	-864378	-867006	-866706
14.06	-863421	-865592	-866489
14.07	-861264	-866027	-867031
14.08	-865198	-865484	-867321
14.09	-862267	-864581	-871114
14.1	-862941	-863483	-866771
14.11	-865111	-866963	-865599
14.12	-863299	-864488	-866678
14.13	-865385	-864509	-866906
14.14	-861128	-865487	-869437
14.15	-861655	-863506	-866113
14.16	-864811	-866739	-868332
14.17	-861195	-866164	-867199
14.18	-862052	-863709	-866072
14.19	-861344	-864873	-868355
14.2	-864617	-865241	-863587
14.21	-862561	-867618	-868177
14.22	-861055	-864333	-866214
14.23	-862798	-868388	-866294
14.24	-862683	-862866	-867201
14.25	-862504	-866016	-869200
14.26	-861527	-866286	-867615
14.27	-860128	-866017	-864877
14.28	-861679	-865350	-866741
14.29	-862920	-865264	-866809
14.3	-861708	-864750	-866618
14.31	-862769	-867607	-865953
14.32	-865002	-863937	-865771
14.33	-860482	-865847	-867033
14.34	-861471	-864834	-866589
14.35	-863158	-866313	-867207
14.36	-864233	-866347	-866667
14.37	-862558	-867075	-865858
14.38	-861067	-866246	-867911
14.39	-861539	-866265	-865794
14.4	-861605	-863400	-866939
14.41	-863068	-864607	-867270
14.42	-863265	-867586	-871324
14.43	-864247	-864604	-867155
14.44	-861515	-865497	-867454
14.45	-861496	-865310	-866078
14.46	-863037	-863663	-867948
14.47	-862301	-865795	-866972
14.48	-862001	-865176	-864874
14.49	-863638	-866190	-866156
14.5	-861472	-865264	-867566
14.51	-863233	-865309	-867777
14.52	-862071	-866648	-868981
14.53	-863076	-864507	-864450
14.54	-863878	-867612	-867344
14.55	-861046	-866148	-867615
14.56	-864981	-861614	-867340
14.57	-860949	-864992	-867673
14.58	-862371	-864853	-867493
14.59	-863008	-865147	-866859
14.6	-862703	-866772	-867449
14.61	-863376	-865084	-866160
14.62	-861441	-863662	-866206
14.63	-863108	-866849	-864918
14.64	-862052	-866394	-868325
14.65	-861318	-865654	-868046
14.66	-863462	-865388	-867802
14.67	-861999	-866313	-869092
14.68	-861125	-863161	-868248
14.69	-862836	-865991	-865758
14.7	-865374	-862495	-866338
14.71	-862374	-864205	-869000
14.72	-863233	-866121	-867676
14.73	-864883	-864912	-869023
14.74	-862989	-865300	-867109
14.75	-860654	-862807	-865026
14.76	-864394	-864817	-865560
14.77	-861317	-864810	-866400
14.78	-863026	-866431	-868366
14.79	-861912	-867723	-869398
14.8	-865257	-865457	-867542
14.81	-862451	-866066	-867553
14.82	-863802	-865404	-867304
14.83	-862507	-861316	-868446
14.84	-865664	-864640	-869218
14.85	-865072	-866161	-869468
14.86	-864803	-866308	-867694
14.87	-863961	-863669	-866682
14.88	-859824	-866136	-867225
14.89	-861569	-863718	-866800
14.9	-861086	-866146	-864781
14.91	-860934	-864695	-868297
14.92	-865073	-863212	-867924
14.93	-863005	-864400	-868645
14.94	-863631	-864667	-866479
14.95	-861053	-867909	-869296
14.96	-862363	-863968	-866135
14.97	-862802	-865296	-867033
14.98	-863176	-864670	-866133
14.99	-860448	-865948	-868650
15	-861523	-864643	-867991
15.01	-863585	-866629	-867390
15.02	-861346	-865045	-868979
15.03	-862586	-866482	-864031
15.04	-864320	-866373	-863021
15.05	-865272	-863888	-866991
15.06	-862907	-865795	-866618
15.07	-861724	-863680	-866398
15.08	-862573	-863234	-867123
15.09	-863635	-864044	-867586
15.1	-862650	-864921	-869322
15.11	-861961	-867335	-867607
15.12	-866892	-865261	-868250
15.13	-861716	-864218	-867252
15.14	-860891	-863532	-868907
15.15	-863440	-865654	-865580
15.16	-863471	-866903	-865626
15.17	-864012	-865892	-866297
15.18	-864818	-864058	-868172
15.19	-865367	-864318	-867190
15.2	-862586	-864201	-868123
15.21	-861639	-866555	-867719
15.22	-860549	-862000	-864424
15.23	-863301	-867199	-865185
15.24	-863764	-865400	-867108
15.25	-862464	-865594	-866609
15.26	-864560	-866227	-868402
15.27	-862396	-865710	-868235
15.28	-863528	-864646	-867403
15.29	-861226	-865519	-868233
15.3	-862137	-867193	-868799
15.31	-861874	-864146	-866563
15.32	-860405	-864558	-867889
15.33	-857805	-865753	-867151
15.34	-861893	-864595	-869039
15.35	-862908	-866257	-864803
15.36	-859983	-865468	-867784
15.37	-864780	-867427	-869427
15.38	-859917	-866505	-869450
15.39	-863255	-864625	-868245
15.4	-862186	-868263	-867535
15.41	-862262	-863317	-867686
15.42	-861941	-864672	-866867
15.43	-863319	-868325	-867436
15.44	-862737	-865016	-864760
15.45	-863780	-867884	-867886
15.46	-860346	-865457	-869016
15.47	-863179	-864333	-867046
15.48	-860511	-866544	-869969
15.49	-860860	-864665	-867562
15.5	-862098	-866320	-865016
15.51	-862111	-867343	-864742
15.52	-862500	-864381	-868438
15.53	-864622	-866094	-867913
15.54	-860855	-865288	-870728
15.55	-863206	-864887	-866298
15.56	-863914	-865891	-867180
15.57	-862047	-865770	-870098
15.58	-859664	-865559	-866557
15.59	-862578	-867437	-868011
15.6	-859539	-865189	-865915
15.61	-862702	-864330	-865498
15.62	-863400	-867242	-868172
15.63	-861449	-867497	-867241
15.64	-859911	-865867	-870012
15.65	-860509	-863932	-865623
15.66	-862585	-863732	-866539
15.67	-866339	-865577	-868891
15.68	-863130	-863498	-868940
15.69	-863396	-863951	-867933
15.7	-862658	-866775	-866760
15.71	-864634	-862404	-866587
15.72	-864443	-864679	-867325
15.73	-863411	-866543	-865054
15.74	-859649	-861296	-867395
15.75	-864073	-863213	-867282
15.76	-862413	-863667	-866562
15.77	-860603	-867080	-868500
15.78	-863176	-865048	-867602
15.79	-862141	-865137	-866663
15.8	-862047	-864519	-870120
15.81	-863111	-865870	-868930
15.82	-861298	-866608	-864743
15.83	-860999	-865330	-867054
15.84	-863767	-862044	-867916
15.85	-862605	-867331	-865783
15.86	-861761	-865768	-867491
15.87	-858340	-866883	-868747
15.88	-862606	-864353	-868552
15.89	-861043	-865917	-869493
15.9	-862683	-864567	-867213
15.91	-859551	-865021	-867918
15.92	-863193	-866930	-866258
15.93	-864831	-866018	-866303
15.94	-862868	-863925	-869021
15.95	-862779	-866858	-868501
15.96	-862890	-863567	-868250
15.97	-862538	-866825	-868723
15.98	-859034	-866060	-864954
15.99	-862860	-862492	-867841
16	-863258	-864024	-868447
16.01	-861048	-866644	-865907
16.02	-862455	-864000	-866509
16.03	-863362	-863472	-864114
16.04	-861556	-863950	-866828
16.05	-864430	-864444	-865655
16.06	-862933	-864946	-866622
16.07	-860990	-864945	-866018
16.08	-864308	-866660	-866869
16.09	-864388	-867353	-866619
16.1	-864096	-865291	-869776
16.11	-861469	-866379	-867499
16.12	-861511	-866989	-867005
16.13	-863133	-864934	-866606
16.14	-863255	-864853	-865509
16.15	-860438	-866091	-869168
16.16	-862078	-868398	-867414
16.17	-862040	-863922	-868240
16.18	-861242	-862944	-867238
16.19	-861471	-863537	-864670
16.2	-863489	-865088	-867267
16.21	-860763	-864036	-868077
16.22	-862535	-865132	-867272
16.23	-862005	-865058	-868230
16.24	-862459	-864216	-867098
16.25	-862145	-865553	-867195
16.26	-860832	-865454	-866038
16.27	-864200	-864327	-868802
16.28	-863544	-866499	-865428
16.29	-862541	-866310	-867228
16.3	-859673	-866060	-867681
16.31	-865314	-863353	-867840
16.32	-861702	-863301	-866632
16.33	-863008	-867158	-864004
16.34	-863288	-865160	-864824
16.35	-861583	-869395	-868634
16.36	-860309	-864796	-866341
16.37	-862681	-865468	-868427
16.38	-861140	-866859	-868020
16.39	-862347	-866982	-870200
16.4	-864282	-866590	-867060
16.41	-864146	-863941	-868016
16.42	-862060	-862934	-864575
16.43	-860624	-863634	-864632
16.44	-862905	-865847	-867860
16.45	-864482	-864199	-867417
16.46	-860935	-863918	-865638
16.47	-863234	-865258	-868502
16.48	-863332	-865486	-866440
16.49	-864310	-866506	-866446
16.5	-863184	-867381	-867370
16.51	-862373	-866288	-868575
16.52	-861487	-866359	-863910
16.53	-861740	-863807	-867792
16.54	-864270	-866384	-866469
16.55	-862792	-866140	-865089
16.56	-862159	-866150	-867048
16.57	-865058	-867416	-864963
16.58	-862252	-866164	-865909
16.59	-860291	-866121	-869410
16.6	-862008	-866144	-867320
16.61	-862779	-867078	-867519
16.62	-861438	-866786	-870162
16.63	-861532	-866626	-867244
16.64	-863287	-863968	-868195
16.65	-859788	-863750	-868398
16.66	-865490	-865918	-868662
16.67	-861382	-866529	-867424
16.68	-861761	-866729	-867889
16.69	-859902	-866658	-868788
16.7	-861604	-865388	-866652
16.71	-863084	-863771	-863949
16.72	-861497	-865064	-866811
16.73	-861704	-867883	-867168
16.74	-862628	-862619	-864646
16.75	-863861	-863073	-870283
16.76	-860275	-865960	-866852
16.77	-866049	-864351	-867439
16.78	-864673	-866242	-866739
16.79	-863079	-865524	-865562
16.8	-863077	-864978	-870461
16.81	-865610	-865992	-867080
16.82	-861531	-866916	-868453
16.83	-860988	-864487	-868005
16.84	-861171	-866457	-866798
16.85	-861719	-866905	-867316
16.86	-861972	-863389	-868283
16.87	-862174	-862934	-867483
16.88	-862973	-865686	-869940
16.89	-862788	-865847	-867053
16.9	-862922	-862859	-865067
16.91	-863132	-865318	-864659
16.92	-860749	-865243	-867348
16.93	-862272	-864619	-867980
16.94	-862020	-866011	-866691
16.95	-862625	-865531	-865318
16.96	-863205	-866066	-866603
16.97	-860811	-864867	-867525
16.98	-861624	-864352	-866959
16.99	-862865	-864806	-867628
17	-861799	-863429	-864658
17.01	-863034	-866100	-868147
17.02	-863213	-864065	-866564
17.03	-861145	-862654	-865998
17.04	-862786	-865621	-868621
17.05	-862624	-861883	-868407
17.06	-863657	-865657	-868940
17.07	-861586	-865591	-867482
17.08	-863413	-865054	-867846
17.09	-862746	-866368	-867937
17.1	-862047	-864605	-866371
17.11	-863482	-867036	-866695
17.12	-863358	-866828	-867699
17.13	-861508	-865689	-867538
17.14	-860349	-866327	-868931
17.15	-865472	-867649	-869315
17.16	-859678	-865433	-868774
17.17	-862659	-866431	-867024
17.18	-864828	-864947	-865973
17.19	-863839	-865612	-870123
17.2	-865068	-863300	-869446
17.21	-862912	-864716	-866726
17.22	-861098	-864209	-868950
17.23	-861264	-866837	-866583
17.24	-862615	-866449	-866169
17.25	-861961	-867151	-867877
17.26	-861619	-865142	-868255
17.27	-863214	-867117	-867109
17.28	-862751	-866387	-867179
17.29	-861459	-867165	-866807
17.3	-862450	-865123	-865819
17.31	-861744	-866031	-869460
17.32	-862071	-865483	-868968
17.33	-862826	-863825	-866562
17.34	-860250	-865025	-867839
17.35	-863228	-864288	-867092
17.36	-863384	-866199	-864273
17.37	-865020	-867224	-866031
17.38	-862034	-865064	-867706
17.39	-862243	-866307	-865192
17.4	-861410	-863929	-867566
17.41	-861772	-863814	-866924
17.42	-864026	-866063	-867376
17.43	-864087	-865366	-866908
17.44	-864068	-867265	-867233
17.45	-863435	-866127	-866900
17.46	-861611	-866864	-866694
17.47	-860737	-865199	-868175
17.48	-861853	-866344	-868337
17.49	-864556	-863492	-865753
17.5	-864548	-863313	-866601
17.51	-861906	-866325	-865582
17.52	-862368	-864610	-865984
17.53	-861218	-865740	-867079
17.54	-862832	-865756	-864826
17.55	-862921	-865605	-869810
17.56	-860838	-864402	-869774
17.57	-862060	-867699	-866726
17.58	-863942	-866966	-866196
17.59	-861409	-866602	-868043
17.6	-860478	-867728	-868191
17.61	-862626	-864469	-865066
17.62	-861515	-864708	-867658
17.63	-859899	-865251	-867339
17.64	-862450	-867994	-866648
17.65	-862471	-868138	-864999
17.66	-862979	-865333	-868207
17.67	-859559	-866441	-866630
17.68	-862826	-864864	-867835
17.69	-865380	-867574	-868786
17.7	-864564	-866498	-867366
17.71	-864315	-866605	-866844
17.72	-860906	-865293	-867496
17.73	-863359	-862390	-868420
17.74	-860884	-867169	-867636
17.75	-863343	-868195	-868331
17.76	-862710	-866038	-868316
17.77	-862283	-864147	-865841
17.78	-862326	-864647	-865291
17.79	-859558	-866033	-867898
17.8	-861573	-865110	-865758
17.81	-861932	-865474	-868905
17.82	-862830	-868199	-866402
17.83	-862032	-864951	-867162
17.84	-863590	-864954	-866697
17.85	-862534	-864706	-868190
17.86	-862735	-864263	-865527
17.87	-861970	-864362	-868356
17.88	-863757	-864250	-871298
17.89	-862582	-865139	-869567
17.9	-865400	-864639	-870574
17.91	-863108	-865356	-866916
17.92	-862204	-863398	-867074
17.93	-861273	-867270	-867995
17.94	-858795	-864083	-867532
17.95	-861140	-864462	-867047
17.96	-864835	-862568	-865830
17.97	-862148	-869337	-871016
17.98	-865045	-863598	-865184
17.99	-861290	-865901	-870547
18	-864294	-864301	-868004
18.01	-863815	-867825	-864753
18.02	-863828	-866515	-868295
18.03	-862412	-866706	-868692
18.04	-861199	-867424	-865093
18.05	-863652	-866199	-868311
18.06	-864306	-865608	-868751
18.07	-861381	-865948	-866586
18.08	-862452	-866125	-866113
18.09	-863813	-862802	-863479
18.1	-861283	-865106	-866044
18.11	-862649	-864327	-868284
18.12	-862689	-865517	-866646
18.13	-863422	-868462	-868185
18.14	-863691	-864515	-867068
18.15	-860755	-862995	-868147
18.16	-862654	-867776	-868664
18.17	-863334	-866630	-865958
18.18	-861122	-864883	-867867
18.19	-863218	-869440	-866232
18.2	-863328	-868031	-867863
18.21	-860879	-864541	-867693
18.22	-859502	-864124	-867349
18.23	-859847	-863935	-866650
18.24	-865135	-866290	-867661
18.25	-862861	-866618	-865699
18.26	-861626	-864238	-867596
18.27	-861556	-866373	-865713
18.28	-862874	-866860	-866732
18.29	-863548	-866034	-870124
18.3	-859065	-863225	-866953
18.31	-863466	-862729	-867978
18.32	-863881	-864388	-866437
18.33	-862958	-865660	-867710
18.34	-863291	-866003	-866862
18.35	-863848	-865311	-866562
18.36	-862141	-862370	-865089
18.37	-862256	-867351	-868133
18.38	-861982	-866336	-865038
18.39	-863351	-864125	-869202
18.4	-862074	-865729	-869676
18.41	-860479	-865430	-866799
18.42	-862131	-866766	-866128
18.43	-862732	-864415	-866091
18.44	-858919	-863721	-865009
18.45	-861519	-865746	-865640
18.46	-859724	-864355	-869147
18.47	-864556	-864556	-866778
18.48	-862715	-866434	-868586
18.49	-861436	-863737	-864631
18.5	-863927	-865169	-868042
18.51	-862561	-866758	-867946
18.52	-863863	-866768	-867494
18.53	-862142	-863943	-865920
18.54	-861856	-865368	-867617
18.55	-861944	-866590	-867286
18.56	-860410	-866610	-865517
18.57	-862794	-867665	-866300
18.58	-860276	-864999	-866034
18.59	-864030	-866147	-866766
18.6	-859342	-865916	-866050
18.61	-862681	-863596	-868646
18.62	-861528	-864281	-867548
18.63	-863853	-868121	-866187
18.64	-861648	-863441	-866944
18.65	-865221	-865251	-867382
18.66	-861485	-863630	-866721
18.67	-862400	-868137	-866483
18.68	-862770	-864893	-866695
18.69	-864185	-865501	-866948
18.7	-861884	-865000	-866685
18.71	-861572	-861499	-867062
18.72	-863193	-862643	-867950
18.73	-862985	-864665	-867938
18.74	-862249	-864931	-865642
18.75	-862570	-863109	-869238
18.76	-863733	-862316	-865315
18.77	-862120	-863955	-866846
18.78	-863334	-870150	-867931
18.79	-862996	-865428	-867954
18.8	-863381	-864750	-868057
18.81	-865893	-865896	-864634
18.82	-862126	-864946	-865575
18.83	-866144	-867970	-867503
18.84	-863862	-865771	-863671
18.85	-860800	-863412	-865114
18.86	-864344	-865664	-868174
18.87	-864379	-864695	-867113
18.88	-860621	-863132	-868104
18.89	-864598	-865416	-868602
18.9	-861942	-864388	-869442
18.91	-861872	-864744	-866241
18.92	-862629	-866668	-866991
18.93	-862666	-864567	-866826
18.94	-860402	-867231	-865554
18.95	-862261	-866734	-867284
18.96	-864681	-864288	-867712
18.97	-862538	-866744	-867388
18.98	-862349	-865854	-868406
18.99	-863501	-865249	-868480
19	-864405	-864788	-870022
19.01	-861591	-864862	-868280
19.02	-864973	-864293	-867635
19.03	-862027	-862168	-866053
19.04	-862441	-865791	-868823
19.05	-862530	-867795	-867052
19.06	-863085	-865886	-868538
19.07	-862219	-866632	-868295
19.08	-860744	-863478	-868921
19.09	-862316	-864056	-866092
19.1	-865118	-865289	-871309
19.11	-864927	-867610	-868160
19.12	-864148	-863015	-865320
19.13	-862138	-864680	-865997
19.14	-864469	-863771	-868336
19.15	-862956	-865106	-866565
19.16	-863755	-865332	-863228
19.17	-859956	-864835	-868753
19.18	-860538	-865722	-868209
19.19	-862217	-866067	-866990
19.2	-863554	-866160	-865275
19.21	-861195	-864360	-867527
19.22	-862393	-863555	-868251
19.23	-862766	-865876	-870249
19.24	-862553	-865441	-867009
19.25	-861647	-864766	-865931
19.26	-861757	-866410	-868619
19.27	-862641	-866400	-864723
19.28	-862963	-865385	-868178
19.29	-864027	-866052	-868289
19.3	-861978	-865133	-866670
19.31	-860536	-865636	-867096
19.32	-861666	-865559	-866860
19.33	-864491	-864654	-865896
19.34	-861282	-864804	-865852
19.35	-864334	-867519	-869341
19.36	-864970	-866784	-867819
19.37	-858680	-863473	-865766
19.38	-861878	-865527	-865446
19.39	-862350	-863650	-867936
19.4	-861062	-865035	-867556
19.41	-864900	-865033	-869151
19.42	-863560	-863513	-867927
19.43	-860781	-865769	-868994
19.44	-863463	-862494	-865983
19.45	-864318	-864604	-865206
19.46	-863961	-863593	-866066
19.47	-860854	-865771	-867457
19.48	-862163	-863579	-865483
19.49	-862634	-865813	-865503
19.5	-864914	-865571	-866753
19.51	-863426	-864360	-869819
19.52	-863518	-866460	-867007
19.53	-861304	-864669	-868197
19.54	-866362	-864534	-867769
19.55	-863240	-865811	-865755
19.56	-862313	-865153	-864874
19.57	-863039	-864880	-867663
19.58	-861100	-867936	-865196
19.59	-861184	-864262	-866597
19.6	-862009	-867339	-869586
19.61	-863027	-862302	-866720
19.62	-862357	-870011	-867590
19.63	-860393	-863894	-866381
19.64	-862904	-866249	-865765
19.65	-862299	-865224	-865791
19.66	-861129	-864665	-869346
19.67	-862756	-866696	-867610
19.68	-862346	-866642	-866325
19.69	-862474	-864928	-865189
19.7	-862553	-862643	-866498
19.71	-861114	-865298	-867514
19.72	-861083	-864232	-868961
19.73	-862621	-865578	-870290
19.74	-862194	-866033	-865270
19.75	-861489	-865739	-867273
19.76	-861360	-864608	-867098
19.77	-861878	-865315	-866847
19.78	-859490	-867595	-866822
19.79	-864770	-865448	-865859
19.8	-862787	-864498	-866007
19.81	-859118	-864333	-867144
19.82	-863207	-862621	-866953
19.83	-864975	-866554	-863530
19.84	-861850	-866278	-867527
19.85	-862701	-865604	-867372
19.86	-860133	-861817	-865902
19.87	-860907	-863762	-865735
19.88	-862851	-863445	-868234
19.89	-864079	-867031	-867830
19.9	-862609	-864929	-866067
19.91	-861883	-863518	-866463
19.92	-861759	-865173	-866240
19.93	-863309	-864204	-866720
19.94	-861018	-864461	-867694
19.95	-863630	-864898	-868734
19.96	-861626	-864569	-866394
19.97	-862267	-863386	-867224
19.98	-863087	-863368	-864438
[truncated: 18,002 more rows]
