# Supplementary material for: Dual-specific autophosphorylation of kinase IKK2 enables phosphorylation of substrate IκBα through a phosphoenzyme intermediate
Source: eLife. 2025 Jun 30;13:RP98009. doi: 10.7554/eLife.98009 (PMC12208667; doi:10.7554/eLife.98009)
Supplement: Supplementary file 4. [file elife-98009-supp4.xlsx]

## Sheet: Sheet1
Time (ns)	UnP-IKK2	p-IKK2	P-IKK2
0	0.0005002	0.341985	0.307081
0.01	0.106138	0.36359	0.332238
0.02	0.109132	0.369478	0.331372
0.03	0.105094	0.371335	0.338896
0.04	0.116753	0.381153	0.349977
0.05	0.120482	0.371815	0.348301
0.06	0.129593	0.375902	0.351791
0.07	0.130751	0.375171	0.351103
0.08	0.134306	0.381348	0.346608
0.09	0.141835	0.377664	0.339255
0.1	0.14214	0.378535	0.342114
0.11	0.150902	0.38317	0.341546
0.12	0.145809	0.389718	0.351229
0.13	0.147637	0.387951	0.346653
0.14	0.155606	0.386186	0.336727
0.15	0.149367	0.390309	0.345776
0.16	0.153797	0.386733	0.34038
0.17	0.158956	0.38373	0.341027
0.18	0.162275	0.3837	0.343897
0.19	0.152402	0.383672	0.343369
0.2	0.167353	0.395221	0.344251
0.21	0.157661	0.390006	0.350082
0.22	0.161363	0.392776	0.355094
0.23	0.150078	0.395286	0.351178
0.24	0.156308	0.385407	0.345446
0.25	0.157775	0.385999	0.346717
0.26	0.169535	0.386316	0.349296
0.27	0.152385	0.385602	0.353546
0.28	0.168095	0.387396	0.360313
0.29	0.165155	0.385068	0.355245
0.3	0.168372	0.389998	0.353927
0.31	0.181647	0.380056	0.350806
0.32	0.180282	0.382535	0.358215
0.33	0.165026	0.382436	0.357577
0.34	0.17728	0.384062	0.35763
0.35	0.167507	0.377707	0.355544
0.36	0.157347	0.385396	0.348769
0.37	0.17612	0.383665	0.354251
0.38	0.158917	0.391148	0.359893
0.39	0.165737	0.394603	0.357068
0.4	0.167769	0.396685	0.37754
0.41	0.169672	0.391499	0.366735
0.42	0.160934	0.390373	0.375246
0.43	0.166627	0.394023	0.3678
0.44	0.165626	0.395476	0.360045
0.45	0.170297	0.395253	0.359937
0.46	0.182388	0.389867	0.360748
0.47	0.165883	0.391038	0.36314
0.48	0.184995	0.391849	0.363925
0.49	0.181654	0.39459	0.364101
0.5	0.184423	0.390864	0.357468
0.51	0.178409	0.389762	0.363073
0.52	0.184732	0.399464	0.362363
0.53	0.179848	0.400567	0.36229
0.54	0.184353	0.396822	0.374772
0.55	0.186821	0.401172	0.366929
0.56	0.170442	0.398311	0.36848
0.57	0.183952	0.401529	0.364096
0.58	0.186068	0.396172	0.36463
0.59	0.170976	0.399508	0.359965
0.6	0.165388	0.40095	0.362449
0.61	0.162797	0.402723	0.361861
0.62	0.154745	0.401218	0.354797
0.63	0.151225	0.40406	0.361022
0.64	0.165081	0.401727	0.361298
0.65	0.157506	0.399826	0.363653
0.66	0.157934	0.402609	0.356661
0.67	0.152595	0.404039	0.361142
0.68	0.162458	0.405916	0.35958
0.69	0.163978	0.398581	0.361458
0.7	0.173743	0.399544	0.367409
0.71	0.169901	0.402929	0.367814
0.72	0.168945	0.402276	0.368371
0.73	0.157056	0.403387	0.369469
0.74	0.168243	0.401259	0.369718
0.75	0.160736	0.397228	0.369552
0.76	0.164078	0.39695	0.366956
0.77	0.177393	0.395154	0.374262
0.78	0.180957	0.392171	0.362842
0.79	0.167061	0.394973	0.368029
0.8	0.164388	0.389873	0.36449
0.81	0.17625	0.400706	0.364838
0.82	0.180786	0.396966	0.361397
0.83	0.166704	0.400138	0.359697
0.84	0.163571	0.401551	0.362689
0.85	0.171397	0.400759	0.372291
0.86	0.172437	0.400706	0.371353
0.87	0.174011	0.396205	0.376117
0.88	0.171629	0.40139	0.37378
0.89	0.179631	0.394402	0.374372
0.9	0.172188	0.392304	0.36737
0.91	0.16689	0.397386	0.364672
0.92	0.166336	0.398121	0.367968
0.93	0.16337	0.392335	0.36355
0.94	0.172539	0.397854	0.365197
0.95	0.163466	0.403001	0.36391
0.96	0.168185	0.400746	0.367725
0.97	0.162767	0.415618	0.363822
0.98	0.167473	0.407868	0.363233
0.99	0.175731	0.404845	0.357628
1	0.186377	0.405137	0.36069
1.01	0.178033	0.398678	0.360432
1.02	0.177785	0.397012	0.364681
1.03	0.170284	0.396107	0.368966
1.04	0.162759	0.397984	0.369131
1.05	0.169486	0.3997	0.369408
1.06	0.165421	0.40057	0.377528
1.07	0.167414	0.397013	0.368605
1.08	0.17806	0.402302	0.374185
1.09	0.173976	0.405525	0.373011
1.1	0.182509	0.415217	0.372404
1.11	0.171755	0.401843	0.372431
1.12	0.177173	0.403519	0.374077
1.13	0.185138	0.403356	0.374952
1.14	0.177095	0.396732	0.377457
1.15	0.183127	0.395174	0.378099
1.16	0.170942	0.405739	0.37747
1.17	0.17468	0.397292	0.381751
1.18	0.166699	0.40034	0.378576
1.19	0.171439	0.401532	0.383069
1.2	0.178419	0.397102	0.381339
1.21	0.184298	0.404894	0.388538
1.22	0.178575	0.407144	0.388425
1.23	0.181914	0.404427	0.382343
1.24	0.17152	0.399744	0.378967
1.25	0.176588	0.40495	0.369461
1.26	0.171357	0.40111	0.370583
1.27	0.170972	0.401857	0.370828
1.28	0.174961	0.402633	0.367378
1.29	0.185621	0.408967	0.380062
1.3	0.189104	0.405211	0.377857
1.31	0.187119	0.405155	0.3749
1.32	0.191476	0.402849	0.381404
1.33	0.190282	0.410655	0.377167
1.34	0.194062	0.410782	0.376727
1.35	0.201422	0.41038	0.370969
1.36	0.205444	0.408017	0.368304
1.37	0.181941	0.402244	0.369004
1.38	0.188453	0.404738	0.373461
1.39	0.183839	0.395531	0.364527
1.4	0.177754	0.399797	0.370874
1.41	0.177388	0.403419	0.378999
1.42	0.187946	0.399307	0.385244
1.43	0.184447	0.397874	0.377447
1.44	0.175484	0.399931	0.381831
1.45	0.177615	0.402083	0.386128
1.46	0.183054	0.407225	0.383286
1.47	0.186446	0.401513	0.385891
1.48	0.182794	0.403943	0.381391
1.49	0.178371	0.40267	0.389363
1.5	0.192084	0.403915	0.389231
1.51	0.184457	0.401962	0.384913
1.52	0.180042	0.407329	0.382421
1.53	0.186518	0.405639	0.385023
1.54	0.175953	0.406102	0.384964
1.55	0.177535	0.402214	0.376229
1.56	0.171622	0.405171	0.377103
1.57	0.169698	0.397964	0.378807
1.58	0.17534	0.395786	0.38476
1.59	0.181591	0.394397	0.384344
1.6	0.170305	0.39414	0.392441
1.61	0.170927	0.399873	0.376993
1.62	0.176901	0.400175	0.380219
1.63	0.170104	0.395758	0.379145
1.64	0.17862	0.397829	0.377572
1.65	0.184507	0.397148	0.369556
1.66	0.17441	0.399738	0.379042
1.67	0.175753	0.401325	0.375659
1.68	0.177417	0.395431	0.378746
1.69	0.177577	0.392726	0.372474
1.7	0.181534	0.39503	0.3695
1.71	0.176553	0.397402	0.375782
1.72	0.167596	0.399436	0.372224
1.73	0.168617	0.398309	0.377872
1.74	0.174707	0.404994	0.376855
1.75	0.181174	0.402456	0.374971
1.76	0.169329	0.406572	0.384559
1.77	0.166517	0.403745	0.389964
1.78	0.1598	0.407822	0.382334
1.79	0.166797	0.403926	0.389566
1.8	0.162807	0.404926	0.392002
1.81	0.177116	0.404804	0.387085
1.82	0.166471	0.406907	0.381597
1.83	0.159097	0.401602	0.384292
1.84	0.170225	0.398635	0.379685
1.85	0.170158	0.39499	0.385879
1.86	0.176018	0.402478	0.386167
1.87	0.185033	0.41442	0.388114
1.88	0.174981	0.404394	0.384103
1.89	0.166781	0.408808	0.385509
1.9	0.165677	0.409932	0.383886
1.91	0.169978	0.408151	0.371304
1.92	0.172872	0.406257	0.376099
1.93	0.171281	0.40395	0.387298
1.94	0.168331	0.412377	0.389024
1.95	0.18179	0.411916	0.386001
1.96	0.179429	0.416545	0.372657
1.97	0.182082	0.4157	0.383446
1.98	0.172276	0.418802	0.370864
1.99	0.172691	0.412557	0.378098
2	0.18057	0.416042	0.373848
2.01	0.170242	0.41451	0.380402
2.02	0.168625	0.418265	0.386634
2.03	0.174902	0.420784	0.389064
2.04	0.1801	0.4177	0.390344
2.05	0.164029	0.421235	0.388601
2.06	0.167744	0.414307	0.392176
2.07	0.171595	0.413372	0.387264
2.08	0.178396	0.418067	0.390226
2.09	0.178222	0.415403	0.389887
2.1	0.172264	0.414865	0.390513
2.11	0.18176	0.415604	0.394086
2.12	0.169087	0.427026	0.384318
2.13	0.16918	0.431584	0.392452
2.14	0.170264	0.427892	0.394926
2.15	0.17318	0.424555	0.389937
2.16	0.171649	0.430704	0.389055
2.17	0.176685	0.430102	0.384669
2.18	0.165992	0.423855	0.390842
2.19	0.170936	0.422777	0.387402
2.2	0.173673	0.428188	0.39581
2.21	0.17011	0.420523	0.388857
2.22	0.184941	0.426861	0.382568
2.23	0.182544	0.424706	0.386344
2.24	0.174481	0.422712	0.390068
2.25	0.184292	0.426574	0.391097
2.26	0.192317	0.423987	0.392656
2.27	0.191555	0.416069	0.385889
2.28	0.186594	0.42198	0.390427
2.29	0.191729	0.415089	0.378162
2.3	0.184926	0.414308	0.392647
2.31	0.190074	0.413789	0.400363
2.32	0.1929	0.426707	0.393023
2.33	0.192293	0.423281	0.395817
2.34	0.184492	0.421936	0.391688
2.35	0.183282	0.420959	0.401095
2.36	0.18694	0.421032	0.3862
2.37	0.185139	0.41466	0.385179
2.38	0.205118	0.410262	0.395732
2.39	0.19395	0.408941	0.401122
2.4	0.180211	0.411554	0.403847
2.41	0.184986	0.409232	0.401981
2.42	0.177669	0.413836	0.404155
2.43	0.191618	0.416282	0.397735
2.44	0.194438	0.415632	0.393923
2.45	0.194157	0.412859	0.390598
2.46	0.202481	0.414393	0.396694
2.47	0.199648	0.420246	0.388688
2.48	0.204486	0.417846	0.38902
2.49	0.201669	0.428046	0.383818
2.5	0.206681	0.422294	0.381007
2.51	0.194462	0.426214	0.386691
2.52	0.178219	0.426919	0.390921
2.53	0.192387	0.424903	0.40112
2.54	0.191682	0.429315	0.382271
2.55	0.196313	0.430071	0.386996
2.56	0.202722	0.427584	0.386508
2.57	0.204192	0.42169	0.385868
2.58	0.201966	0.418755	0.384576
2.59	0.213332	0.425407	0.396306
2.6	0.206659	0.414735	0.38688
2.61	0.227006	0.414544	0.38715
2.62	0.210646	0.422711	0.385324
2.63	0.205105	0.418193	0.384045
2.64	0.214014	0.419869	0.382561
2.65	0.205928	0.414304	0.390808
2.66	0.204902	0.412899	0.387096
2.67	0.20876	0.418679	0.395316
2.68	0.212299	0.421271	0.395724
2.69	0.19727	0.423816	0.400061
2.7	0.212352	0.425887	0.39489
2.71	0.211707	0.421523	0.390373
2.72	0.213446	0.426207	0.383634
2.73	0.211177	0.41825	0.391216
2.74	0.214069	0.417005	0.389151
2.75	0.204481	0.417717	0.385027
2.76	0.207632	0.420945	0.388202
2.77	0.213425	0.421321	0.389753
2.78	0.210344	0.425855	0.376048
2.79	0.20484	0.415669	0.378528
2.8	0.207248	0.414586	0.385586
2.81	0.213108	0.417573	0.388635
2.82	0.211383	0.419875	0.389486
2.83	0.201721	0.409847	0.382935
2.84	0.21142	0.420969	0.393173
2.85	0.19225	0.412125	0.386973
2.86	0.203889	0.415924	0.384118
2.87	0.207412	0.427937	0.392271
2.88	0.208002	0.416928	0.382226
2.89	0.205693	0.419995	0.385147
2.9	0.206434	0.418517	0.396047
2.91	0.21002	0.420158	0.408661
2.92	0.207005	0.417431	0.399412
2.93	0.197118	0.412095	0.406633
2.94	0.205096	0.42442	0.399828
2.95	0.19663	0.42419	0.402987
2.96	0.221506	0.427653	0.39957
2.97	0.222807	0.431357	0.401693
2.98	0.221675	0.428431	0.402973
2.99	0.223496	0.418799	0.402078
3	0.210164	0.417415	0.411786
3.01	0.21137	0.420498	0.410559
3.02	0.197303	0.418676	0.404305
3.03	0.20122	0.423185	0.416719
3.04	0.212004	0.433413	0.407361
3.05	0.193179	0.434511	0.412216
3.06	0.206455	0.43227	0.405034
3.07	0.210357	0.438105	0.411982
3.08	0.213119	0.429902	0.403174
3.09	0.215594	0.424156	0.397936
3.1	0.208671	0.425987	0.396594
3.11	0.209842	0.428118	0.396627
3.12	0.214912	0.427488	0.397327
3.13	0.224592	0.423391	0.399577
3.14	0.248399	0.422429	0.399513
3.15	0.229944	0.42654	0.395281
3.16	0.23889	0.426939	0.398199
3.17	0.231526	0.432599	0.390546
3.18	0.228062	0.436189	0.402019
3.19	0.225158	0.424173	0.400108
3.2	0.21829	0.431253	0.407805
3.21	0.215151	0.434614	0.395682
3.22	0.214191	0.436228	0.406668
3.23	0.222766	0.434324	0.398908
3.24	0.228512	0.442399	0.401214
3.25	0.209222	0.440753	0.399611
3.26	0.210252	0.43702	0.400803
3.27	0.209836	0.439462	0.397032
3.28	0.216265	0.446369	0.398253
3.29	0.19891	0.445418	0.397017
3.3	0.211246	0.438776	0.400206
3.31	0.202925	0.439876	0.399796
3.32	0.217564	0.435445	0.408502
3.33	0.21297	0.429444	0.416076
3.34	0.214855	0.43891	0.399444
3.35	0.215945	0.432266	0.40233
3.36	0.219177	0.431866	0.393397
3.37	0.217187	0.430543	0.404749
3.38	0.212316	0.429932	0.406787
3.39	0.210834	0.430338	0.392148
3.4	0.206667	0.424955	0.387508
3.41	0.194945	0.423954	0.396961
3.42	0.199219	0.430789	0.39739
3.43	0.199247	0.432193	0.395896
3.44	0.195019	0.441609	0.397238
3.45	0.20296	0.43616	0.39874
3.46	0.20847	0.428013	0.398282
3.47	0.212692	0.426522	0.395035
3.48	0.210201	0.433221	0.400106
3.49	0.218015	0.431546	0.396743
3.5	0.231685	0.426561	0.402265
3.51	0.22528	0.421197	0.401523
3.52	0.2397	0.427735	0.396691
3.53	0.242831	0.436223	0.402
3.54	0.234726	0.437389	0.399564
3.55	0.249086	0.447011	0.398345
3.56	0.239033	0.449953	0.401357
3.57	0.229943	0.448468	0.403063
3.58	0.23211	0.443371	0.399272
3.59	0.223855	0.444221	0.402675
3.6	0.229702	0.441769	0.390878
3.61	0.237563	0.439263	0.396884
3.62	0.231912	0.441029	0.404879
3.63	0.220881	0.436973	0.406508
3.64	0.216074	0.439941	0.408276
3.65	0.208606	0.443223	0.412444
3.66	0.212691	0.442225	0.411251
3.67	0.226588	0.44549	0.410347
3.68	0.224126	0.449041	0.401981
3.69	0.224561	0.454292	0.397195
3.7	0.220237	0.4617	0.4073
3.71	0.211883	0.453785	0.402057
3.72	0.220714	0.459427	0.405447
3.73	0.207402	0.460065	0.405042
3.74	0.206174	0.460792	0.406544
3.75	0.211877	0.465548	0.410925
3.76	0.215006	0.454072	0.402611
3.77	0.219279	0.449076	0.400634
3.78	0.204743	0.451776	0.401056
3.79	0.226752	0.444916	0.406962
3.8	0.217833	0.44152	0.396387
3.81	0.210252	0.453439	0.406818
3.82	0.210159	0.446877	0.403814
3.83	0.203479	0.446577	0.402954
3.84	0.221209	0.447811	0.396299
3.85	0.226671	0.449628	0.39667
3.86	0.231827	0.443488	0.402853
3.87	0.216458	0.440207	0.401984
3.88	0.225741	0.436854	0.403038
3.89	0.214302	0.438919	0.409648
3.9	0.217639	0.441153	0.420993
3.91	0.228828	0.43627	0.418172
3.92	0.220322	0.440512	0.423204
3.93	0.235217	0.444017	0.428526
3.94	0.234374	0.450181	0.423708
3.95	0.226607	0.448904	0.42087
3.96	0.238614	0.449107	0.419441
3.97	0.233738	0.451425	0.428284
3.98	0.215442	0.446688	0.43349
3.99	0.21887	0.452905	0.419955
4	0.22108	0.449377	0.430568
4.01	0.219473	0.454008	0.42331
4.02	0.226574	0.44062	0.426549
4.03	0.222826	0.444981	0.424317
4.04	0.234054	0.443476	0.427092
4.05	0.241764	0.434519	0.428882
4.06	0.236004	0.434324	0.425105
4.07	0.229489	0.442917	0.425427
4.08	0.227767	0.433076	0.42763
4.09	0.233912	0.426618	0.422089
4.1	0.237605	0.427442	0.416079
4.11	0.229023	0.430719	0.41946
4.12	0.229847	0.426891	0.417898
4.13	0.239478	0.433321	0.417067
4.14	0.237174	0.438575	0.412272
4.15	0.227536	0.436726	0.412834
4.16	0.23316	0.428906	0.420469
4.17	0.239318	0.426063	0.405109
4.18	0.237896	0.428983	0.421968
4.19	0.245223	0.422516	0.419094
4.2	0.230427	0.420208	0.416536
4.21	0.24	0.426586	0.424822
4.22	0.239858	0.422572	0.422796
4.23	0.248483	0.430362	0.426335
4.24	0.246458	0.431023	0.424014
4.25	0.24811	0.429518	0.421613
4.26	0.235985	0.435689	0.417594
4.27	0.242878	0.433123	0.431896
4.28	0.23367	0.431353	0.427036
4.29	0.239794	0.438117	0.418707
4.3	0.249004	0.436165	0.436064
4.31	0.248065	0.43708	0.438915
4.32	0.240956	0.436884	0.441192
4.33	0.260497	0.439828	0.435379
4.34	0.249755	0.436886	0.422738
4.35	0.238912	0.447234	0.406821
4.36	0.241338	0.443404	0.419518
4.37	0.242389	0.438317	0.411467
4.38	0.238887	0.440953	0.420557
4.39	0.242283	0.436116	0.411058
4.4	0.242616	0.446888	0.419449
4.41	0.240869	0.443126	0.412113
4.42	0.254533	0.446216	0.418825
4.43	0.258962	0.448237	0.431696
4.44	0.2413	0.448656	0.442489
4.45	0.250659	0.444192	0.442517
4.46	0.244913	0.449601	0.426146
4.47	0.254704	0.44975	0.439004
4.48	0.248406	0.441676	0.437631
4.49	0.247369	0.435061	0.437619
4.5	0.244159	0.437535	0.424254
4.51	0.246631	0.444193	0.42432
4.52	0.260108	0.428729	0.423601
4.53	0.25672	0.431676	0.433965
4.54	0.252211	0.428647	0.433707
4.55	0.247332	0.425076	0.428795
4.56	0.255521	0.436497	0.441494
4.57	0.259012	0.434464	0.431894
4.58	0.254416	0.428231	0.425195
4.59	0.247391	0.435348	0.423133
4.6	0.245198	0.436628	0.419941
4.61	0.243125	0.43429	0.431573
4.62	0.239443	0.434821	0.433284
4.63	0.235243	0.448862	0.434908
4.64	0.245171	0.448211	0.418431
4.65	0.243516	0.455093	0.423603
4.66	0.248248	0.455278	0.421723
4.67	0.237166	0.447425	0.43474
4.68	0.246361	0.440449	0.43196
4.69	0.244797	0.444617	0.423876
4.7	0.264103	0.437883	0.435014
4.71	0.256242	0.437271	0.432998
4.72	0.255163	0.432826	0.422977
4.73	0.253234	0.442028	0.423049
4.74	0.250395	0.43666	0.417239
4.75	0.249735	0.450937	0.416651
4.76	0.254939	0.439489	0.4206
4.77	0.251673	0.439912	0.425778
4.78	0.252915	0.434267	0.418618
4.79	0.240617	0.445056	0.413581
4.8	0.254493	0.434566	0.414092
4.81	0.262208	0.439696	0.41365
4.82	0.25796	0.453698	0.415069
4.83	0.277347	0.445373	0.406997
4.84	0.28151	0.45003	0.399806
4.85	0.271748	0.440172	0.418895
4.86	0.267837	0.446407	0.421343
4.87	0.277852	0.441254	0.414851
4.88	0.274173	0.447305	0.411264
4.89	0.26871	0.452091	0.404322
4.9	0.268558	0.445891	0.411454
4.91	0.280854	0.443667	0.421298
4.92	0.279384	0.436765	0.426111
4.93	0.277204	0.439933	0.418283
4.94	0.27374	0.437855	0.417025
4.95	0.281441	0.438755	0.416201
4.96	0.273203	0.432339	0.418999
4.97	0.275236	0.434997	0.417643
4.98	0.283856	0.433175	0.417341
4.99	0.279295	0.428749	0.423906
5	0.284398	0.432103	0.417036
5.01	0.290734	0.43433	0.409321
5.02	0.28323	0.438336	0.414204
5.03	0.28135	0.427048	0.422183
5.04	0.268444	0.434625	0.407666
5.05	0.262274	0.435361	0.411894
5.06	0.266361	0.438147	0.421609
5.07	0.273446	0.434653	0.407467
5.08	0.265601	0.43609	0.404425
5.09	0.257855	0.436744	0.415835
5.1	0.256152	0.43441	0.419207
5.11	0.261017	0.43947	0.411083
5.12	0.264289	0.436783	0.407169
5.13	0.266479	0.432867	0.419424
5.14	0.265193	0.438792	0.415257
5.15	0.266672	0.437758	0.421473
5.16	0.263222	0.433793	0.422527
5.17	0.26767	0.439137	0.424451
5.18	0.267985	0.432428	0.423144
5.19	0.273129	0.438771	0.417677
5.2	0.263663	0.442227	0.409305
5.21	0.28212	0.438248	0.411492
5.22	0.271934	0.436644	0.426015
5.23	0.271176	0.446345	0.417746
5.24	0.277075	0.444229	0.407352
5.25	0.284546	0.440175	0.415676
5.26	0.267235	0.44304	0.411131
5.27	0.264647	0.436814	0.412442
5.28	0.261514	0.432379	0.415561
5.29	0.26896	0.43124	0.410361
5.3	0.279863	0.436051	0.409263
5.31	0.268064	0.433753	0.418493
5.32	0.280419	0.442311	0.40955
5.33	0.262726	0.443356	0.403956
5.34	0.270248	0.44352	0.398186
5.35	0.277045	0.446658	0.401213
5.36	0.255793	0.435106	0.403152
5.37	0.267573	0.444732	0.400992
5.38	0.271228	0.444234	0.401311
5.39	0.255887	0.449078	0.406044
5.4	0.258658	0.451218	0.404971
5.41	0.260016	0.448562	0.406893
5.42	0.254502	0.449504	0.408118
5.43	0.259	0.447976	0.417162
5.44	0.265591	0.446099	0.419204
5.45	0.254706	0.447919	0.409812
5.46	0.257048	0.442303	0.402864
5.47	0.262303	0.439329	0.405892
5.48	0.246043	0.445903	0.41961
5.49	0.246831	0.451689	0.422442
5.5	0.249843	0.449842	0.420526
5.51	0.253588	0.445947	0.427458
5.52	0.258102	0.445257	0.424609
5.53	0.257423	0.453419	0.424571
5.54	0.245419	0.452454	0.421065
5.55	0.24985	0.455157	0.417319
5.56	0.252712	0.447065	0.412557
5.57	0.242806	0.444235	0.420053
5.58	0.2324	0.449983	0.423057
5.59	0.23993	0.452309	0.415865
5.6	0.258229	0.451331	0.412531
5.61	0.238583	0.445607	0.421028
5.62	0.247099	0.444352	0.415206
5.63	0.261599	0.440467	0.415711
5.64	0.256547	0.444213	0.415025
5.65	0.249751	0.440921	0.418437
5.66	0.256089	0.445582	0.412303
5.67	0.263001	0.443069	0.409756
5.68	0.259175	0.442697	0.409064
5.69	0.249264	0.439813	0.412825
5.7	0.240278	0.4428	0.412601
5.71	0.239584	0.442016	0.430274
5.72	0.234636	0.439761	0.425432
5.73	0.252204	0.444782	0.41821
5.74	0.241644	0.44022	0.408573
5.75	0.250332	0.425934	0.412326
5.76	0.242222	0.427892	0.407828
5.77	0.237994	0.432651	0.405287
5.78	0.233572	0.429783	0.412358
5.79	0.24271	0.42947	0.409779
5.8	0.23446	0.436002	0.409273
5.81	0.249065	0.436443	0.425981
5.82	0.262865	0.440173	0.420895
5.83	0.25542	0.434611	0.425006
5.84	0.246374	0.443386	0.421226
5.85	0.238815	0.445607	0.420619
5.86	0.245875	0.451253	0.419544
5.87	0.240237	0.443803	0.41503
5.88	0.240293	0.450964	0.419669
5.89	0.235037	0.447793	0.418138
5.9	0.248607	0.447071	0.419678
5.91	0.25755	0.447355	0.418971
5.92	0.253086	0.456367	0.42403
5.93	0.237126	0.447759	0.421296
5.94	0.248218	0.448037	0.421759
5.95	0.235793	0.441348	0.426303
5.96	0.236379	0.447711	0.422582
5.97	0.221282	0.448019	0.418476
5.98	0.228824	0.448021	0.421019
5.99	0.223957	0.450819	0.421225
6	0.221741	0.44733	0.416499
6.01	0.236938	0.449954	0.423316
6.02	0.229908	0.452365	0.417851
6.03	0.228906	0.446682	0.428444
6.04	0.228698	0.444201	0.41484
6.05	0.240703	0.440826	0.41378
6.06	0.22761	0.438131	0.418185
6.07	0.23662	0.437667	0.418157
6.08	0.234489	0.433787	0.412585
6.09	0.244721	0.429903	0.41909
6.1	0.237285	0.43027	0.423922
6.11	0.254174	0.429698	0.425023
6.12	0.247714	0.434572	0.42465
6.13	0.259352	0.433301	0.426291
6.14	0.250796	0.430057	0.430543
6.15	0.249587	0.435066	0.427715
6.16	0.254195	0.433291	0.44192
6.17	0.238421	0.427917	0.45671
6.18	0.255266	0.433853	0.442141
6.19	0.260043	0.429967	0.438423
6.2	0.249096	0.435203	0.427809
6.21	0.25638	0.433101	0.424785
6.22	0.243068	0.435927	0.423416
6.23	0.235611	0.438452	0.431118
6.24	0.236478	0.430398	0.438534
6.25	0.243443	0.432646	0.437229
6.26	0.258477	0.436054	0.435331
6.27	0.244291	0.437189	0.439094
6.28	0.247066	0.429518	0.439465
6.29	0.243338	0.428439	0.432322
6.3	0.228703	0.430268	0.434239
6.31	0.238554	0.427815	0.449817
6.32	0.233242	0.427697	0.439785
6.33	0.228471	0.429527	0.435233
6.34	0.226968	0.426942	0.428041
6.35	0.223428	0.43762	0.433946
6.36	0.236246	0.435572	0.440553
6.37	0.233647	0.438624	0.429312
6.38	0.234179	0.438775	0.429027
6.39	0.236385	0.433461	0.430881
6.4	0.233787	0.435376	0.429949
6.41	0.237124	0.435484	0.429916
6.42	0.23539	0.430817	0.431032
6.43	0.239417	0.437227	0.43276
6.44	0.246226	0.438984	0.437881
6.45	0.247393	0.455012	0.432251
6.46	0.242349	0.449365	0.428518
6.47	0.250333	0.447311	0.43046
6.48	0.248171	0.457832	0.424077
6.49	0.245585	0.460323	0.424974
6.5	0.242877	0.447006	0.420408
6.51	0.242778	0.454521	0.430306
6.52	0.229558	0.447802	0.439289
6.53	0.230649	0.439464	0.437148
6.54	0.231089	0.443974	0.421123
6.55	0.229601	0.447208	0.437922
6.56	0.226882	0.441611	0.434886
6.57	0.226179	0.447248	0.429121
6.58	0.22591	0.448579	0.438497
6.59	0.23007	0.456047	0.440063
6.6	0.229178	0.448472	0.446693
6.61	0.219784	0.448267	0.438536
6.62	0.223576	0.44425	0.441942
6.63	0.225166	0.436461	0.43207
6.64	0.230067	0.438963	0.436304
6.65	0.232627	0.444912	0.430248
6.66	0.224159	0.443577	0.42813
6.67	0.218559	0.443121	0.4349
6.68	0.232429	0.449229	0.441385
6.69	0.223601	0.439672	0.430372
6.7	0.229995	0.440714	0.428813
6.71	0.23858	0.448767	0.432536
6.72	0.245223	0.444651	0.430658
6.73	0.239403	0.443407	0.430818
6.74	0.242616	0.441888	0.439056
6.75	0.249672	0.446373	0.431826
6.76	0.248944	0.451572	0.436652
6.77	0.251063	0.444727	0.448207
6.78	0.234993	0.446184	0.441664
6.79	0.240383	0.439773	0.437631
6.8	0.248247	0.446736	0.440366
6.81	0.232585	0.446621	0.432066
6.82	0.235805	0.439631	0.427056
6.83	0.223666	0.445955	0.436431
6.84	0.232284	0.44722	0.435931
6.85	0.237153	0.4505	0.440198
6.86	0.237384	0.450552	0.426886
6.87	0.236645	0.448778	0.428047
6.88	0.232882	0.44692	0.427074
6.89	0.236118	0.436695	0.43867
6.9	0.229276	0.437107	0.445238
6.91	0.220887	0.442745	0.443907
6.92	0.242478	0.441763	0.440102
6.93	0.233206	0.437423	0.436886
6.94	0.23636	0.440592	0.431659
6.95	0.226896	0.450939	0.432156
6.96	0.234576	0.452086	0.423103
6.97	0.249208	0.450967	0.421205
6.98	0.26426	0.458769	0.423137
6.99	0.260479	0.45849	0.414407
7	0.248758	0.455113	0.421991
7.01	0.254013	0.450563	0.434746
7.02	0.269819	0.451078	0.441603
7.03	0.26784	0.448923	0.438958
7.04	0.26298	0.4514	0.447222
7.05	0.26025	0.453944	0.440608
7.06	0.270278	0.457624	0.436371
7.07	0.275658	0.455706	0.427825
7.08	0.280112	0.454132	0.428054
7.09	0.266049	0.455455	0.42496
7.1	0.262266	0.451411	0.435198
7.11	0.250344	0.45153	0.445289
7.12	0.263049	0.442153	0.440802
7.13	0.243269	0.443874	0.446157
7.14	0.25629	0.440101	0.448788
7.15	0.245829	0.439242	0.435132
7.16	0.259074	0.442605	0.436587
7.17	0.264547	0.434558	0.438616
7.18	0.254969	0.441756	0.439255
7.19	0.257577	0.439617	0.446635
7.2	0.258371	0.432756	0.441768
7.21	0.250794	0.430341	0.443421
7.22	0.247233	0.43059	0.440086
7.23	0.247739	0.432779	0.434183
7.24	0.247631	0.433428	0.426419
7.25	0.26369	0.432994	0.433578
7.26	0.252557	0.436839	0.434874
7.27	0.263475	0.440411	0.433222
7.28	0.251636	0.444572	0.443988
7.29	0.255914	0.443605	0.440995
7.3	0.269019	0.44207	0.428628
7.31	0.267387	0.437103	0.426814
7.32	0.270196	0.438751	0.426085
7.33	0.272131	0.43565	0.428417
7.34	0.247651	0.438486	0.430786
7.35	0.242507	0.434081	0.42409
7.36	0.249801	0.442787	0.425057
7.37	0.252506	0.439336	0.424007
7.38	0.25619	0.434441	0.422937
7.39	0.258104	0.435421	0.421704
7.4	0.263406	0.440542	0.424488
7.41	0.256073	0.428522	0.423603
7.42	0.269607	0.4343	0.431921
7.43	0.263595	0.435153	0.430712
7.44	0.258491	0.440496	0.43517
7.45	0.255782	0.430022	0.428488
7.46	0.249479	0.428098	0.425682
7.47	0.255903	0.434027	0.419549
7.48	0.254495	0.435535	0.413839
7.49	0.251063	0.420088	0.427341
7.5	0.243564	0.426675	0.43405
7.51	0.244573	0.43019	0.433648
7.52	0.25512	0.425522	0.430252
7.53	0.253497	0.426162	0.425568
7.54	0.260437	0.43137	0.423644
7.55	0.264491	0.429191	0.424542
7.56	0.276798	0.432769	0.436681
7.57	0.263751	0.427122	0.42509
7.58	0.256511	0.428572	0.431876
7.59	0.265956	0.43869	0.42327
7.6	0.259219	0.430249	0.439276
7.61	0.263819	0.430525	0.439136
7.62	0.274039	0.434433	0.433267
7.63	0.263587	0.44348	0.433557
7.64	0.276822	0.442742	0.427542
7.65	0.276139	0.432073	0.433431
7.66	0.280614	0.433439	0.440337
7.67	0.295427	0.439942	0.438774
7.68	0.305911	0.433365	0.433395
7.69	0.283557	0.435047	0.436185
7.7	0.28489	0.431327	0.423171
7.71	0.297669	0.436643	0.426372
7.72	0.280504	0.43673	0.425621
7.73	0.283629	0.434529	0.421931
7.74	0.281518	0.426215	0.418297
7.75	0.26984	0.431267	0.418597
7.76	0.274263	0.428088	0.429441
7.77	0.27774	0.431903	0.428125
7.78	0.277927	0.439615	0.423366
7.79	0.278413	0.441824	0.427133
7.8	0.270445	0.445194	0.432381
7.81	0.282434	0.449789	0.440106
7.82	0.282227	0.442614	0.435711
7.83	0.286378	0.447719	0.432001
7.84	0.269518	0.444913	0.440522
7.85	0.278007	0.449461	0.435853
7.86	0.274818	0.438819	0.428588
7.87	0.27293	0.441036	0.428337
7.88	0.277742	0.438293	0.428546
7.89	0.274891	0.429909	0.424609
7.9	0.263786	0.433207	0.435319
7.91	0.256129	0.43903	0.427347
7.92	0.268276	0.44623	0.435923
7.93	0.25148	0.444689	0.435572
7.94	0.257873	0.437098	0.432487
7.95	0.268376	0.451343	0.438755
7.96	0.266039	0.445866	0.435976
7.97	0.265834	0.432602	0.434001
7.98	0.259395	0.432671	0.44026
7.99	0.266272	0.43092	0.439814
8	0.275032	0.423704	0.433785
8.01	0.27959	0.425945	0.430895
8.02	0.2694	0.43484	0.426153
8.03	0.277432	0.434657	0.430454
8.04	0.278975	0.432173	0.428159
8.05	0.266413	0.430464	0.432542
8.06	0.265589	0.432456	0.438008
8.07	0.271222	0.427101	0.431536
8.08	0.266118	0.42985	0.435658
8.09	0.27122	0.434567	0.428866
8.1	0.280647	0.432053	0.437081
8.11	0.279557	0.433987	0.438306
8.12	0.285474	0.431771	0.431435
8.13	0.266168	0.432934	0.436003
8.14	0.265697	0.426899	0.433709
8.15	0.259851	0.431945	0.431107
8.16	0.265704	0.437359	0.439039
8.17	0.269707	0.435947	0.448232
8.18	0.284085	0.436027	0.431188
8.19	0.277495	0.437724	0.438706
8.2	0.274686	0.439993	0.433125
8.21	0.2581	0.443203	0.432616
8.22	0.267189	0.445144	0.443746
8.23	0.27143	0.440952	0.438005
8.24	0.27486	0.447777	0.4452
8.25	0.271665	0.444289	0.440443
8.26	0.2591	0.439837	0.440362
8.27	0.274078	0.439194	0.43664
8.28	0.245432	0.433968	0.445912
8.29	0.251411	0.438052	0.439546
8.3	0.251578	0.443341	0.43951
8.31	0.261834	0.442018	0.441316
8.32	0.247683	0.434561	0.441241
8.33	0.252227	0.436564	0.4449
8.34	0.250709	0.433256	0.435431
8.35	0.247991	0.43635	0.443808
8.36	0.250289	0.436636	0.443092
8.37	0.264614	0.438966	0.444777
8.38	0.263602	0.435545	0.446347
8.39	0.261185	0.440981	0.449181
8.4	0.270867	0.440019	0.462427
8.41	0.274926	0.432927	0.447199
8.42	0.273268	0.430706	0.441102
8.43	0.260108	0.432895	0.454762
8.44	0.273015	0.427105	0.453262
8.45	0.263396	0.430224	0.446975
8.46	0.263713	0.430753	0.442777
8.47	0.255658	0.430053	0.453465
8.48	0.250716	0.429628	0.444504
8.49	0.269869	0.430984	0.433577
8.5	0.270045	0.431836	0.440555
8.51	0.261421	0.426175	0.439786
8.52	0.269862	0.426034	0.433346
8.53	0.279503	0.430333	0.434851
8.54	0.2639	0.424623	0.439241
8.55	0.259221	0.427465	0.423805
8.56	0.257885	0.43845	0.449163
8.57	0.253842	0.441395	0.44471
8.58	0.250479	0.434461	0.436336
8.59	0.251612	0.428054	0.444915
8.6	0.249322	0.428285	0.445279
8.61	0.257115	0.443563	0.444175
8.62	0.265269	0.44299	0.440882
8.63	0.261156	0.436103	0.437184
8.64	0.268294	0.434255	0.43397
8.65	0.280953	0.434814	0.437132
8.66	0.271684	0.436979	0.443792
8.67	0.267138	0.437516	0.445411
8.68	0.272748	0.433646	0.437216
8.69	0.257747	0.428621	0.43111
8.7	0.2682	0.436917	0.434527
8.71	0.272657	0.44211	0.436256
8.72	0.271071	0.431973	0.439048
8.73	0.274714	0.430882	0.435104
8.74	0.265519	0.438806	0.437684
8.75	0.259638	0.434994	0.440596
8.76	0.269879	0.436292	0.430145
8.77	0.252786	0.433346	0.432573
8.78	0.254417	0.434897	0.429215
8.79	0.258391	0.436369	0.433603
8.8	0.257833	0.425659	0.424617
8.81	0.261729	0.422299	0.432241
8.82	0.260421	0.425186	0.422997
8.83	0.259148	0.426835	0.427039
8.84	0.272902	0.433363	0.433813
8.85	0.27062	0.427728	0.426689
8.86	0.268274	0.426065	0.422881
8.87	0.271931	0.425023	0.429689
8.88	0.276835	0.434319	0.427089
8.89	0.283689	0.44239	0.445322
8.9	0.292708	0.435979	0.443856
8.91	0.286456	0.433316	0.443296
8.92	0.285097	0.427922	0.437019
8.93	0.278422	0.428526	0.435881
8.94	0.287396	0.438074	0.431952
8.95	0.274782	0.4242	0.441826
8.96	0.278014	0.424674	0.44542
8.97	0.28064	0.425345	0.440493
8.98	0.271812	0.436589	0.440144
8.99	0.26475	0.428853	0.437889
9	0.27958	0.435343	0.442414
9.01	0.274412	0.437968	0.437773
9.02	0.279722	0.435657	0.437823
9.03	0.281335	0.440052	0.438454
9.04	0.285975	0.435364	0.428539
9.05	0.274204	0.440709	0.420814
9.06	0.28947	0.445037	0.419202
9.07	0.281862	0.446476	0.421148
9.08	0.274668	0.438208	0.433436
9.09	0.278877	0.442352	0.425162
9.1	0.297449	0.438166	0.42403
9.11	0.291095	0.444704	0.420444
9.12	0.288667	0.434067	0.426318
9.13	0.272349	0.43535	0.422117
9.14	0.278936	0.431078	0.419242
9.15	0.268767	0.433911	0.425166
9.16	0.261868	0.434918	0.428251
9.17	0.260807	0.433697	0.429625
9.18	0.256314	0.4291	0.433219
9.19	0.253914	0.42579	0.426294
9.2	0.260459	0.423423	0.427427
9.21	0.2646	0.425611	0.424568
9.22	0.257482	0.420999	0.424081
9.23	0.249508	0.424574	0.425231
9.24	0.264314	0.422658	0.433831
9.25	0.275575	0.432621	0.433132
9.26	0.280098	0.420868	0.431784
9.27	0.27374	0.432778	0.435181
9.28	0.280289	0.428494	0.439619
9.29	0.279125	0.420707	0.435565
9.3	0.272718	0.423581	0.426877
9.31	0.278884	0.429405	0.429843
9.32	0.267305	0.420104	0.436682
9.33	0.267017	0.418498	0.446407
9.34	0.276829	0.421652	0.439531
9.35	0.266971	0.417971	0.446938
9.36	0.259028	0.422519	0.44451
9.37	0.264265	0.429363	0.437456
9.38	0.265439	0.423959	0.442591
9.39	0.259353	0.424987	0.449683
9.4	0.262641	0.430295	0.448607
9.41	0.270955	0.432885	0.440103
9.42	0.269242	0.429741	0.445731
9.43	0.264304	0.429628	0.44615
9.44	0.271686	0.441021	0.448842
9.45	0.292149	0.432908	0.447354
9.46	0.276675	0.435416	0.459622
9.47	0.278005	0.434795	0.454743
9.48	0.280164	0.434149	0.448803
9.49	0.271952	0.442758	0.45076
9.5	0.264015	0.446997	0.459079
9.51	0.267224	0.452152	0.453777
9.52	0.273845	0.444788	0.46081
9.53	0.270183	0.439146	0.471283
9.54	0.263365	0.440318	0.472025
9.55	0.269597	0.438166	0.458236
9.56	0.27172	0.43952	0.469995
9.57	0.281277	0.430733	0.453769
9.58	0.282029	0.431004	0.459366
9.59	0.286076	0.441922	0.447453
9.6	0.279365	0.435468	0.447077
9.61	0.281163	0.434874	0.451877
9.62	0.285491	0.428684	0.453057
9.63	0.289528	0.428273	0.453426
9.64	0.295255	0.429774	0.44797
9.65	0.296633	0.426225	0.456595
9.66	0.28557	0.427905	0.439834
9.67	0.273203	0.419543	0.445865
9.68	0.277958	0.42588	0.445875
9.69	0.287744	0.429681	0.452058
9.7	0.282634	0.426133	0.457049
9.71	0.289246	0.427858	0.458961
9.72	0.288909	0.423586	0.455081
9.73	0.285865	0.431401	0.462294
9.74	0.285219	0.439339	0.452263
9.75	0.274956	0.433501	0.452995
9.76	0.284644	0.43448	0.461678
9.77	0.274585	0.439326	0.46183
9.78	0.275141	0.436836	0.469036
9.79	0.278428	0.436243	0.456209
9.8	0.278206	0.436851	0.460955
9.81	0.282659	0.443952	0.444737
9.82	0.27894	0.43706	0.444186
9.83	0.283093	0.44005	0.443914
9.84	0.287555	0.436251	0.442593
9.85	0.2946	0.435024	0.452537
9.86	0.2875	0.433617	0.463261
9.87	0.281252	0.435798	0.453958
9.88	0.277641	0.444025	0.468923
9.89	0.274956	0.448418	0.464434
9.9	0.279862	0.435822	0.468268
9.91	0.276829	0.439965	0.461518
9.92	0.278301	0.436545	0.465817
9.93	0.268082	0.444357	0.463576
9.94	0.278699	0.438035	0.451525
9.95	0.279404	0.432594	0.456392
9.96	0.268807	0.436677	0.468632
9.97	0.276118	0.443435	0.466267
9.98	0.28162	0.438338	0.471626
9.99	0.274445	0.437721	0.469517
10	0.273499	0.434918	0.458206
10.01	0.280767	0.443647	0.465589
10.02	0.281553	0.438062	0.465585
10.03	0.272842	0.438342	0.473334
10.04	0.28022	0.435416	0.484945
10.05	0.273291	0.431199	0.481016
10.06	0.288938	0.437639	0.503005
10.07	0.29139	0.440816	0.481551
10.08	0.291881	0.443896	0.478208
10.09	0.284722	0.435232	0.470586
10.1	0.28387	0.443093	0.468958
10.11	0.27805	0.44299	0.466659
10.12	0.272259	0.446543	0.462399
10.13	0.264712	0.451282	0.464442
10.14	0.276203	0.447273	0.467691
10.15	0.270513	0.452306	0.464337
10.16	0.281845	0.451083	0.457396
10.17	0.281776	0.445697	0.46074
10.18	0.285733	0.445709	0.447716
10.19	0.284706	0.445705	0.451657
10.2	0.287661	0.447481	0.446431
10.21	0.286346	0.450999	0.455917
10.22	0.280784	0.452885	0.469948
10.23	0.2792	0.454238	0.459213
10.24	0.295272	0.461544	0.448904
10.25	0.287376	0.458282	0.455822
10.26	0.281769	0.449615	0.45823
10.27	0.290295	0.455323	0.470761
10.28	0.289258	0.453525	0.469248
10.29	0.275777	0.452237	0.463816
10.3	0.282443	0.450637	0.46343
10.31	0.280374	0.454349	0.45745
10.32	0.270744	0.441495	0.450552
10.33	0.273766	0.440333	0.449645
10.34	0.279511	0.448816	0.44842
10.35	0.272477	0.455055	0.439267
10.36	0.267682	0.453165	0.455534
10.37	0.269306	0.443038	0.444341
10.38	0.278673	0.449932	0.457014
10.39	0.284074	0.436668	0.444551
10.4	0.26985	0.439732	0.444754
10.41	0.266692	0.448928	0.444521
10.42	0.263285	0.448648	0.444237
10.43	0.26674	0.451781	0.458024
10.44	0.27607	0.460574	0.446013
10.45	0.27062	0.448797	0.44847
10.46	0.270269	0.446806	0.454094
10.47	0.263833	0.448892	0.4416
10.48	0.270367	0.451246	0.445557
10.49	0.265908	0.450424	0.450806
10.5	0.272987	0.451534	0.463687
10.51	0.271116	0.448216	0.459516
10.52	0.273943	0.456797	0.461055
10.53	0.284453	0.453606	0.45808
10.54	0.273357	0.45006	0.460731
10.55	0.27119	0.45107	0.456397
10.56	0.285864	0.444467	0.454931
10.57	0.278557	0.449014	0.466322
10.58	0.281356	0.450842	0.455563
10.59	0.279052	0.451419	0.454325
10.6	0.275154	0.450867	0.450919
10.61	0.269968	0.460962	0.456906
10.62	0.285402	0.448748	0.444825
10.63	0.281137	0.449504	0.455602
10.64	0.286492	0.448025	0.453894
10.65	0.277474	0.445287	0.456179
10.66	0.284818	0.449026	0.452099
10.67	0.280072	0.453751	0.457275
10.68	0.282557	0.449083	0.457621
10.69	0.289247	0.446794	0.453778
10.7	0.284123	0.448535	0.450144
10.71	0.274215	0.44392	0.455054
10.72	0.268794	0.455769	0.465045
10.73	0.261282	0.453875	0.464719
10.74	0.271366	0.449209	0.469019
10.75	0.257138	0.455148	0.462385
10.76	0.269095	0.457051	0.470384
10.77	0.265111	0.458033	0.460563
10.78	0.264665	0.46347	0.460144
10.79	0.279445	0.450135	0.458971
10.8	0.288027	0.448153	0.460624
10.81	0.288671	0.443953	0.449825
10.82	0.274513	0.443096	0.454045
10.83	0.288843	0.448612	0.459076
10.84	0.296882	0.450109	0.453277
10.85	0.289418	0.442617	0.448759
10.86	0.290184	0.439234	0.445901
10.87	0.292461	0.445845	0.460601
10.88	0.281336	0.439504	0.449817
10.89	0.273582	0.448084	0.454506
10.9	0.275287	0.453798	0.45764
10.91	0.285156	0.450927	0.447389
10.92	0.292645	0.450453	0.43656
10.93	0.288249	0.451577	0.441582
10.94	0.286692	0.444877	0.451521
10.95	0.276718	0.446628	0.445009
10.96	0.279873	0.440339	0.450234
10.97	0.277288	0.444952	0.450183
10.98	0.272608	0.445712	0.454433
10.99	0.265346	0.443967	0.441647
11	0.269249	0.435912	0.439249
11.01	0.261789	0.437154	0.435269
11.02	0.266902	0.447427	0.441076
11.03	0.274517	0.443007	0.44643
11.04	0.272682	0.446022	0.456539
11.05	0.267185	0.438034	0.459791
11.06	0.264012	0.436121	0.46069
11.07	0.259692	0.447147	0.46453
11.08	0.274027	0.451846	0.463947
11.09	0.270904	0.450143	0.461328
11.1	0.275638	0.451819	0.468721
11.11	0.270144	0.442468	0.47365
11.12	0.269148	0.44318	0.474402
11.13	0.255088	0.44072	0.469786
11.14	0.269887	0.440915	0.479038
11.15	0.267908	0.443167	0.474757
11.16	0.261847	0.440878	0.486797
11.17	0.256806	0.438645	0.476422
11.18	0.267417	0.446264	0.47904
11.19	0.266296	0.445067	0.485171
11.2	0.266844	0.444517	0.472278
11.21	0.273537	0.442288	0.471613
11.22	0.261895	0.435158	0.47223
11.23	0.26878	0.442868	0.472152
11.24	0.26964	0.437755	0.470386
11.25	0.2627	0.438451	0.461457
11.26	0.273395	0.436171	0.462856
11.27	0.258812	0.438143	0.453403
11.28	0.267001	0.435984	0.446334
11.29	0.26688	0.435444	0.449093
11.3	0.258171	0.434184	0.44432
11.31	0.262043	0.435977	0.449431
11.32	0.269365	0.439473	0.456141
11.33	0.264563	0.439649	0.447623
11.34	0.258304	0.442804	0.443574
11.35	0.266761	0.440675	0.442598
11.36	0.266851	0.440442	0.445924
11.37	0.270224	0.438712	0.433253
11.38	0.264829	0.439221	0.440969
11.39	0.265295	0.433594	0.434882
11.4	0.262472	0.43043	0.44153
11.41	0.27362	0.434042	0.446593
11.42	0.257232	0.429941	0.439043
11.43	0.270381	0.427224	0.456139
11.44	0.262673	0.424742	0.439017
11.45	0.268657	0.427624	0.442584
11.46	0.259727	0.428398	0.439276
11.47	0.26218	0.43917	0.449339
11.48	0.258961	0.437286	0.453258
11.49	0.256947	0.433365	0.441485
11.5	0.250356	0.436988	0.447792
11.51	0.263183	0.432933	0.455825
11.52	0.263844	0.431592	0.453369
11.53	0.256083	0.429366	0.445343
11.54	0.266957	0.430011	0.443617
11.55	0.263776	0.421274	0.44977
11.56	0.259622	0.423628	0.455405
11.57	0.266363	0.431091	0.449981
11.58	0.276772	0.436611	0.44459
11.59	0.26902	0.427326	0.456265
11.6	0.265793	0.43454	0.45466
11.61	0.267509	0.430565	0.465043
11.62	0.266575	0.432779	0.467818
11.63	0.263799	0.435045	0.459751
11.64	0.260646	0.427468	0.461899
11.65	0.269424	0.436072	0.456813
11.66	0.257112	0.433333	0.468227
11.67	0.263242	0.430215	0.471422
11.68	0.264118	0.427515	0.475546
11.69	0.256964	0.422334	0.461969
11.7	0.281324	0.43155	0.457674
11.71	0.267206	0.431443	0.468528
11.72	0.257358	0.434154	0.480257
11.73	0.253699	0.437744	0.467027
11.74	0.255224	0.435135	0.469816
11.75	0.2571	0.433996	0.475193
11.76	0.253429	0.434715	0.468284
11.77	0.259148	0.429122	0.46887
11.78	0.25244	0.436448	0.460183
11.79	0.250064	0.427073	0.455094
11.8	0.253297	0.436916	0.463199
11.81	0.248943	0.435708	0.472889
11.82	0.263912	0.432811	0.456778
11.83	0.265069	0.435823	0.467975
11.84	0.253028	0.431151	0.462652
11.85	0.263989	0.432047	0.454757
11.86	0.276631	0.433961	0.447669
11.87	0.259827	0.447736	0.45175
11.88	0.262158	0.43924	0.456063
11.89	0.260289	0.447599	0.453551
11.9	0.253461	0.43955	0.452387
11.91	0.259258	0.435459	0.442761
11.92	0.258077	0.435188	0.45137
11.93	0.262562	0.439079	0.462269
11.94	0.264734	0.444277	0.47375
11.95	0.279924	0.444384	0.453057
11.96	0.276393	0.44129	0.45345
11.97	0.268704	0.442088	0.463053
11.98	0.2737	0.433848	0.458278
11.99	0.273674	0.433354	0.452455
12	0.25316	0.439715	0.465562
12.01	0.257507	0.441682	0.471403
12.02	0.254369	0.451749	0.462511
12.03	0.264635	0.451956	0.470798
12.04	0.260085	0.451277	0.479113
12.05	0.267873	0.45547	0.472553
12.06	0.26468	0.45026	0.487127
12.07	0.270426	0.448316	0.48451
12.08	0.26518	0.449018	0.478363
12.09	0.265754	0.440311	0.482317
12.1	0.265184	0.447916	0.476154
12.11	0.262899	0.445304	0.467296
12.12	0.258215	0.440701	0.466179
12.13	0.26334	0.444322	0.475608
12.14	0.2774	0.444516	0.468336
12.15	0.254802	0.434478	0.455367
12.16	0.257012	0.434864	0.46546
12.17	0.253242	0.435157	0.45616
12.18	0.257736	0.437969	0.449242
12.19	0.243602	0.434725	0.458396
12.2	0.262216	0.433742	0.456722
12.21	0.256942	0.435986	0.45389
12.22	0.253521	0.438663	0.454797
12.23	0.254403	0.431545	0.450904
12.24	0.252633	0.43736	0.461632
12.25	0.256598	0.435334	0.454035
12.26	0.258202	0.432006	0.456923
12.27	0.246346	0.432442	0.472769
12.28	0.25815	0.442029	0.462041
12.29	0.260304	0.442256	0.456526
12.3	0.243114	0.444119	0.461134
12.31	0.256804	0.43654	0.466334
12.32	0.253814	0.439787	0.457215
12.33	0.24628	0.433304	0.451267
12.34	0.243578	0.428497	0.453888
12.35	0.245646	0.430827	0.450311
12.36	0.253264	0.43969	0.445329
12.37	0.246945	0.428083	0.460806
12.38	0.25728	0.431173	0.461449
12.39	0.260794	0.426908	0.460176
12.4	0.264836	0.432121	0.451797
12.41	0.26288	0.427532	0.450216
12.42	0.247301	0.430179	0.447117
12.43	0.25359	0.425937	0.468949
12.44	0.240426	0.432461	0.462575
12.45	0.244266	0.438435	0.456179
12.46	0.251389	0.435115	0.45435
12.47	0.259144	0.430986	0.452138
12.48	0.255081	0.432771	0.45287
12.49	0.259003	0.428173	0.468181
12.5	0.259934	0.441665	0.466062
12.51	0.265138	0.438318	0.458149
12.52	0.257558	0.439979	0.453828
12.53	0.273035	0.430828	0.45794
12.54	0.262632	0.440886	0.453543
12.55	0.257966	0.439099	0.460206
12.56	0.266174	0.435974	0.455157
12.57	0.270886	0.43064	0.471735
12.58	0.272082	0.435514	0.46689
12.59	0.275598	0.430541	0.465341
12.6	0.25947	0.440017	0.457381
12.61	0.257129	0.427991	0.466392
12.62	0.265814	0.430784	0.460842
12.63	0.266914	0.428955	0.460319
12.64	0.26569	0.431748	0.465406
12.65	0.25724	0.42423	0.459193
12.66	0.256573	0.427446	0.447136
12.67	0.255112	0.429336	0.464817
12.68	0.255702	0.431418	0.464068
12.69	0.261624	0.431866	0.47172
12.7	0.264236	0.440171	0.461548
12.71	0.26266	0.4419	0.465853
12.72	0.273823	0.441565	0.459063
12.73	0.265037	0.444839	0.451106
12.74	0.265439	0.442254	0.469057
12.75	0.259842	0.439419	0.468393
12.76	0.26037	0.442198	0.476255
12.77	0.260455	0.447806	0.476069
12.78	0.268675	0.44892	0.483331
12.79	0.265336	0.444419	0.478329
12.8	0.272121	0.450336	0.477384
12.81	0.262389	0.444368	0.484325
12.82	0.261763	0.444264	0.478858
12.83	0.261082	0.443914	0.477426
12.84	0.265802	0.452421	0.46803
12.85	0.27302	0.459273	0.468524
12.86	0.281826	0.454624	0.489591
12.87	0.272941	0.45079	0.480701
12.88	0.266964	0.446917	0.473272
12.89	0.261593	0.451313	0.4843
12.9	0.271394	0.445706	0.476434
12.91	0.265635	0.454039	0.485909
12.92	0.27371	0.454822	0.481031
12.93	0.261653	0.460716	0.489055
12.94	0.274932	0.461404	0.484883
12.95	0.271307	0.464441	0.48536
12.96	0.271755	0.464923	0.477829
12.97	0.268462	0.464805	0.480778
12.98	0.272902	0.458442	0.477332
12.99	0.2662	0.452313	0.479459
13	0.260044	0.448396	0.480579
13.01	0.274476	0.449353	0.492436
13.02	0.270695	0.454692	0.477784
13.03	0.275169	0.455702	0.478409
13.04	0.287378	0.460125	0.467102
13.05	0.274539	0.454423	0.458264
13.06	0.280546	0.455692	0.463491
13.07	0.267043	0.457255	0.476361
13.08	0.266259	0.455774	0.477927
13.09	0.258123	0.46103	0.47808
13.1	0.257093	0.455636	0.478186
13.11	0.251107	0.454626	0.470585
13.12	0.25643	0.454457	0.47382
13.13	0.249892	0.461716	0.47038
13.14	0.255937	0.471168	0.469178
13.15	0.265605	0.461206	0.472025
13.16	0.252758	0.467055	0.470569
13.17	0.258352	0.464582	0.470154
13.18	0.252131	0.456186	0.487751
13.19	0.262933	0.456656	0.485712
13.2	0.268866	0.452713	0.497017
13.21	0.260813	0.452295	0.498875
13.22	0.268492	0.461278	0.497911
13.23	0.262625	0.461157	0.506614
13.24	0.253572	0.461029	0.503962
13.25	0.253064	0.463633	0.496129
13.26	0.263172	0.452485	0.500707
13.27	0.25835	0.456865	0.500908
13.28	0.262186	0.466113	0.495285
13.29	0.263234	0.462508	0.496158
13.3	0.272776	0.463077	0.507694
13.31	0.273038	0.469211	0.503381
13.32	0.270901	0.466436	0.493764
13.33	0.269093	0.45774	0.504551
13.34	0.259067	0.455979	0.487387
13.35	0.259164	0.46441	0.488409
13.36	0.262513	0.46102	0.490971
13.37	0.252198	0.461608	0.485765
13.38	0.256436	0.458644	0.474894
13.39	0.264194	0.45278	0.475556
13.4	0.267856	0.450742	0.481949
13.41	0.262443	0.460766	0.477977
13.42	0.269957	0.457755	0.474589
13.43	0.259278	0.462972	0.465668
13.44	0.269684	0.448966	0.478972
13.45	0.262108	0.44679	0.487023
13.46	0.272096	0.460825	0.483808
13.47	0.260941	0.459481	0.485942
13.48	0.267247	0.463778	0.487753
13.49	0.26438	0.450231	0.49317
13.5	0.26002	0.453683	0.497057
13.51	0.265325	0.452244	0.49405
13.52	0.263437	0.454081	0.496265
13.53	0.256921	0.449235	0.510158
13.54	0.258415	0.445	0.513647
13.55	0.268354	0.447104	0.503718
13.56	0.264962	0.444949	0.492559
13.57	0.263055	0.448126	0.493161
13.58	0.254213	0.449926	0.504672
13.59	0.269859	0.452012	0.487583
13.6	0.262456	0.457219	0.480072
13.61	0.258862	0.459556	0.485214
13.62	0.259653	0.464446	0.498327
13.63	0.263621	0.467071	0.493949
13.64	0.257078	0.476235	0.498851
13.65	0.266028	0.466146	0.493035
13.66	0.256321	0.458547	0.505148
13.67	0.264163	0.460971	0.494832
13.68	0.269316	0.452562	0.517076
13.69	0.272342	0.459538	0.498684
13.7	0.268639	0.464523	0.49091
13.71	0.263518	0.461556	0.498462
13.72	0.257775	0.460005	0.494971
13.73	0.252588	0.451067	0.484395
13.74	0.251748	0.444876	0.481486
13.75	0.259402	0.44492	0.46741
13.76	0.251559	0.458425	0.474896
13.77	0.243754	0.452725	0.475081
13.78	0.235121	0.449983	0.480865
13.79	0.250677	0.452883	0.470101
13.8	0.248194	0.45108	0.478263
13.81	0.254831	0.440902	0.477895
13.82	0.240763	0.441024	0.477692
13.83	0.242616	0.437008	0.474388
13.84	0.247785	0.429453	0.476353
13.85	0.248341	0.435006	0.477103
13.86	0.241509	0.435055	0.467626
13.87	0.230242	0.438226	0.474263
13.88	0.239291	0.431553	0.472589
13.89	0.234289	0.439681	0.476222
13.9	0.233959	0.4404	0.470397
13.91	0.248871	0.441619	0.476634
13.92	0.239175	0.448065	0.471811
13.93	0.243626	0.450134	0.477737
13.94	0.234374	0.441561	0.484613
13.95	0.235744	0.445523	0.480478
13.96	0.236008	0.443014	0.464903
13.97	0.235381	0.45071	0.472706
13.98	0.238343	0.450486	0.480716
13.99	0.241282	0.451139	0.470965
14	0.240778	0.45195	0.482206
14.01	0.238993	0.447558	0.473486
14.02	0.229287	0.456195	0.471778
14.03	0.232293	0.449676	0.490089
14.04	0.232267	0.455026	0.479247
14.05	0.242916	0.457685	0.486256
14.06	0.23782	0.451685	0.467669
14.07	0.236288	0.456672	0.463685
14.08	0.245344	0.453977	0.465639
14.09	0.245009	0.459006	0.475041
14.1	0.249654	0.452028	0.46313
14.11	0.238076	0.449098	0.472987
14.12	0.242096	0.451118	0.466446
14.13	0.247749	0.446392	0.480571
14.14	0.25537	0.444508	0.482357
14.15	0.251652	0.438227	0.475949
14.16	0.241306	0.438695	0.471504
14.17	0.244783	0.43652	0.461593
14.18	0.244733	0.441498	0.451549
14.19	0.238068	0.435083	0.448658
14.2	0.248613	0.440991	0.450885
14.21	0.244631	0.44672	0.451713
14.22	0.245548	0.446607	0.436566
14.23	0.240669	0.436474	0.430938
14.24	0.235778	0.442379	0.428404
14.25	0.242996	0.436365	0.428036
14.26	0.242276	0.433573	0.439898
14.27	0.242354	0.432514	0.438616
14.28	0.252034	0.438024	0.44193
14.29	0.256368	0.446266	0.442954
14.3	0.248557	0.439385	0.450771
14.31	0.250298	0.436603	0.454985
14.32	0.247989	0.44266	0.457788
14.33	0.250294	0.441418	0.457254
14.34	0.244189	0.439487	0.459789
14.35	0.256639	0.438787	0.463471
14.36	0.25652	0.4419	0.457034
14.37	0.257256	0.443496	0.462108
14.38	0.25441	0.456074	0.45199
14.39	0.248328	0.456118	0.452619
14.4	0.26153	0.456467	0.445685
14.41	0.24183	0.460726	0.449153
14.42	0.264832	0.460752	0.444618
14.43	0.258085	0.455371	0.438169
14.44	0.258119	0.456046	0.446006
14.45	0.260511	0.456337	0.444328
14.46	0.248616	0.440171	0.446078
14.47	0.259452	0.451523	0.459628
14.48	0.254338	0.456965	0.457067
14.49	0.25355	0.458997	0.469517
14.5	0.248475	0.455694	0.465421
14.51	0.256818	0.468313	0.469379
14.52	0.245879	0.46989	0.462859
14.53	0.249674	0.470951	0.46389
14.54	0.249765	0.464763	0.471642
14.55	0.2588	0.4658	0.469462
14.56	0.249709	0.455788	0.466197
14.57	0.249818	0.455227	0.472261
14.58	0.241846	0.444989	0.458413
14.59	0.252635	0.446234	0.4573
14.6	0.254505	0.451824	0.461369
14.61	0.257186	0.453339	0.473751
14.62	0.247868	0.438545	0.469077
14.63	0.258447	0.445007	0.462568
14.64	0.245737	0.447933	0.45701
14.65	0.248835	0.446311	0.452063
14.66	0.244788	0.449541	0.44988
14.67	0.255092	0.443151	0.459323
14.68	0.240782	0.444221	0.464052
14.69	0.243373	0.444656	0.470492
14.7	0.253117	0.446441	0.465278
14.71	0.258835	0.440458	0.473331
14.72	0.249533	0.446876	0.458774
14.73	0.245243	0.444319	0.469807
14.74	0.251326	0.433816	0.46903
14.75	0.247727	0.438743	0.468859
14.76	0.249014	0.438772	0.471103
14.77	0.244674	0.434219	0.470158
14.78	0.245116	0.444944	0.457958
14.79	0.248247	0.448254	0.472343
14.8	0.255196	0.438421	0.461208
14.81	0.263253	0.432999	0.471766
14.82	0.256215	0.43767	0.474491
14.83	0.26285	0.431594	0.477413
14.84	0.263086	0.432336	0.465447
14.85	0.264663	0.432889	0.46945
14.86	0.263459	0.427319	0.481025
14.87	0.259516	0.429773	0.480262
14.88	0.266464	0.438429	0.478424
14.89	0.263478	0.437333	0.485949
14.9	0.258351	0.443208	0.468604
14.91	0.259457	0.432444	0.478685
14.92	0.262479	0.429417	0.476407
14.93	0.256811	0.436725	0.489405
14.94	0.260718	0.443049	0.483732
14.95	0.262956	0.442016	0.484601
14.96	0.255945	0.436856	0.476465
14.97	0.256835	0.4385	0.478148
14.98	0.262102	0.429884	0.474774
14.99	0.262992	0.432928	0.483101
15	0.261074	0.43238	0.488391
15.01	0.272137	0.426547	0.487457
15.02	0.263871	0.429996	0.484996
15.03	0.247557	0.430899	0.474467
15.04	0.268169	0.435612	0.469739
15.05	0.26348	0.433758	0.471126
15.06	0.257732	0.437251	0.470258
15.07	0.261913	0.438892	0.48189
15.08	0.25539	0.442533	0.47756
15.09	0.258434	0.433103	0.483654
15.1	0.257265	0.432382	0.487978
15.11	0.259729	0.434736	0.486277
15.12	0.264028	0.434814	0.48196
15.13	0.260024	0.444158	0.480895
15.14	0.263048	0.447387	0.481989
15.15	0.268105	0.445517	0.483572
15.16	0.263271	0.44459	0.477697
15.17	0.261932	0.445297	0.48881
15.18	0.261303	0.451448	0.485982
15.19	0.268978	0.450881	0.48199
15.2	0.268444	0.458133	0.468415
15.21	0.260209	0.453234	0.478359
15.22	0.260763	0.446342	0.471355
15.23	0.260856	0.440946	0.481231
15.24	0.26037	0.445298	0.473693
15.25	0.259449	0.442046	0.474706
15.26	0.264254	0.452016	0.466666
15.27	0.262718	0.447464	0.483032
15.28	0.263092	0.449104	0.485654
15.29	0.267337	0.447496	0.489701
15.3	0.268738	0.463868	0.483376
15.31	0.254799	0.459622	0.493328
15.32	0.253787	0.46641	0.487131
15.33	0.258479	0.462649	0.490383
15.34	0.262719	0.466717	0.495407
15.35	0.255756	0.46279	0.496395
15.36	0.265697	0.460612	0.488343
15.37	0.271438	0.468503	0.49467
15.38	0.255153	0.45536	0.484276
15.39	0.259035	0.455466	0.493931
15.4	0.264639	0.446345	0.49098
15.41	0.253187	0.438993	0.494942
15.42	0.255629	0.439702	0.490722
15.43	0.242009	0.434841	0.493787
15.44	0.247315	0.438477	0.494037
15.45	0.243422	0.434439	0.487213
15.46	0.241265	0.427065	0.487587
15.47	0.242068	0.442713	0.493482
15.48	0.255715	0.443687	0.493972
15.49	0.258178	0.439002	0.492319
15.5	0.251566	0.446236	0.487925
15.51	0.263128	0.440653	0.492845
15.52	0.243674	0.432673	0.488254
15.53	0.260925	0.430471	0.493348
15.54	0.250248	0.433414	0.499296
15.55	0.242743	0.433505	0.489564
15.56	0.245801	0.429551	0.499933
15.57	0.248339	0.433079	0.505399
15.58	0.252775	0.439524	0.504163
15.59	0.248121	0.434024	0.491609
15.6	0.24549	0.433951	0.486632
15.61	0.246759	0.437056	0.494851
15.62	0.237639	0.435912	0.493187
15.63	0.251163	0.436678	0.50341
15.64	0.248038	0.443915	0.493128
15.65	0.244308	0.449799	0.497042
15.66	0.232258	0.452903	0.50391
15.67	0.244163	0.444283	0.493067
15.68	0.235497	0.435449	0.509276
15.69	0.229656	0.435129	0.497269
15.7	0.229188	0.432829	0.498055
15.71	0.23954	0.437027	0.498246
15.72	0.249609	0.454848	0.480286
15.73	0.253119	0.457698	0.475943
15.74	0.241545	0.457608	0.479894
15.75	0.252738	0.449535	0.490915
15.76	0.264688	0.443712	0.487465
15.77	0.265756	0.440757	0.490028
15.78	0.258095	0.443569	0.484123
15.79	0.25511	0.438972	0.475218
15.8	0.249768	0.437823	0.488026
15.81	0.251418	0.435847	0.476414
15.82	0.247993	0.438028	0.483291
15.83	0.25358	0.445162	0.490262
15.84	0.255092	0.439468	0.484435
15.85	0.247701	0.44725	0.471608
15.86	0.245893	0.442654	0.472458
15.87	0.2429	0.447254	0.477302
15.88	0.246425	0.444511	0.483736
15.89	0.248606	0.455583	0.486026
15.9	0.238883	0.449247	0.478819
15.91	0.246728	0.449967	0.466983
15.92	0.234542	0.447851	0.483733
15.93	0.235115	0.440419	0.487241
15.94	0.233371	0.449134	0.491281
15.95	0.231678	0.445063	0.480611
15.96	0.239374	0.448285	0.484186
15.97	0.235297	0.446836	0.48427
15.98	0.247185	0.438887	0.491043
15.99	0.241629	0.440617	0.4885
16	0.237642	0.43946	0.497085
16.01	0.229923	0.438681	0.49819
16.02	0.234287	0.441283	0.512549
16.03	0.243894	0.435081	0.509002
16.04	0.237826	0.437986	0.506029
16.05	0.234081	0.427268	0.521332
16.06	0.233263	0.434477	0.511972
16.07	0.229707	0.428032	0.518508
16.08	0.229193	0.422228	0.522282
16.09	0.240524	0.424421	0.525167
16.1	0.235461	0.434598	0.518135
16.11	0.24131	0.438268	0.526429
16.12	0.247405	0.432926	0.516314
16.13	0.241394	0.430546	0.514855
16.14	0.253412	0.42786	0.510674
16.15	0.259723	0.436327	0.515967
16.16	0.264329	0.434529	0.515285
16.17	0.264096	0.431875	0.502971
16.18	0.266246	0.436482	0.510546
16.19	0.263343	0.443521	0.505253
16.2	0.25256	0.439176	0.502658
16.21	0.255541	0.437858	0.511737
16.22	0.2518	0.430399	0.509982
16.23	0.248955	0.434901	0.510581
16.24	0.243668	0.435528	0.499357
16.25	0.241209	0.432776	0.507999
16.26	0.244279	0.432234	0.506861
16.27	0.248631	0.426331	0.507674
16.28	0.251539	0.430146	0.500508
16.29	0.251121	0.433353	0.49851
16.3	0.24575	0.442068	0.499483
16.31	0.242803	0.436824	0.491237
16.32	0.236794	0.437083	0.494508
16.33	0.228253	0.432935	0.509154
16.34	0.231333	0.437698	0.509705
16.35	0.238474	0.436027	0.504294
16.36	0.224996	0.437839	0.505839
16.37	0.228554	0.441056	0.507946
16.38	0.228078	0.442682	0.508996
16.39	0.239009	0.437356	0.511323
16.4	0.23536	0.437439	0.503117
16.41	0.234758	0.449255	0.500856
16.42	0.243353	0.446101	0.504328
16.43	0.23263	0.449703	0.490728
16.44	0.23888	0.439029	0.503367
16.45	0.238417	0.443003	0.504647
16.46	0.236864	0.440567	0.503002
16.47	0.246215	0.435745	0.501988
16.48	0.23728	0.446603	0.502726
16.49	0.230637	0.450974	0.500999
16.5	0.239367	0.447121	0.513723
16.51	0.238919	0.447052	0.497159
16.52	0.23404	0.449141	0.489493
16.53	0.240253	0.438096	0.487501
16.54	0.242428	0.43572	0.485059
16.55	0.237203	0.444604	0.488459
16.56	0.231012	0.448538	0.496098
16.57	0.243415	0.450315	0.490505
16.58	0.23325	0.446564	0.487632
16.59	0.234077	0.455106	0.493557
16.6	0.231315	0.449451	0.493339
16.61	0.229469	0.440881	0.498977
16.62	0.229145	0.442922	0.502025
16.63	0.237833	0.444667	0.496491
16.64	0.240955	0.431614	0.490303
16.65	0.240111	0.437944	0.487028
16.66	0.25151	0.436074	0.487821
16.67	0.245382	0.449791	0.48889
16.68	0.248372	0.455166	0.484351
16.69	0.240928	0.45054	0.485164
16.7	0.236669	0.44875	0.493187
16.71	0.233406	0.455744	0.490763
16.72	0.227222	0.454733	0.499568
16.73	0.243092	0.451896	0.490001
16.74	0.238451	0.453217	0.501093
16.75	0.240777	0.446621	0.510208
16.76	0.238439	0.451653	0.494541
16.77	0.236803	0.457132	0.486149
16.78	0.234625	0.448933	0.481329
16.79	0.242412	0.452832	0.495462
16.8	0.228442	0.456209	0.48878
16.81	0.226364	0.452171	0.491205
16.82	0.230335	0.452173	0.482655
16.83	0.230228	0.455807	0.479891
16.84	0.235893	0.453597	0.490389
16.85	0.239445	0.453334	0.487829
16.86	0.23212	0.458459	0.499474
16.87	0.222994	0.46081	0.48144
16.88	0.23658	0.457906	0.48368
16.89	0.231752	0.462882	0.488578
16.9	0.229605	0.454484	0.488645
16.91	0.229494	0.446915	0.493345
16.92	0.233399	0.454136	0.48192
16.93	0.233989	0.444618	0.48631
16.94	0.239982	0.452272	0.48376
16.95	0.245263	0.451298	0.481991
16.96	0.235713	0.441747	0.480052
16.97	0.242942	0.450286	0.470804
16.98	0.247621	0.446663	0.484533
16.99	0.243406	0.449762	0.479939
17	0.23147	0.437289	0.475496
17.01	0.246106	0.444874	0.48692
17.02	0.239143	0.44566	0.473541
17.03	0.235165	0.438246	0.481036
17.04	0.234562	0.438733	0.474085
17.05	0.242838	0.441482	0.475979
17.06	0.234094	0.439567	0.482555
17.07	0.237034	0.437929	0.476201
17.08	0.241323	0.440086	0.484752
17.09	0.241128	0.437913	0.484837
17.1	0.236627	0.440544	0.498423
17.11	0.235306	0.444905	0.487738
17.12	0.234572	0.437028	0.48666
17.13	0.245062	0.438234	0.50741
17.14	0.256325	0.447674	0.493992
17.15	0.241559	0.437337	0.513369
17.16	0.234889	0.446662	0.509353
17.17	0.231182	0.450829	0.520226
17.18	0.229987	0.444626	0.510454
17.19	0.229187	0.450417	0.497316
17.2	0.224966	0.455086	0.502835
17.21	0.23022	0.450945	0.499422
17.22	0.232137	0.453492	0.507862
17.23	0.232788	0.446225	0.499926
17.24	0.235472	0.446855	0.496941
17.25	0.234813	0.449531	0.500578
17.26	0.241369	0.458237	0.497087
17.27	0.23983	0.448084	0.495205
17.28	0.235531	0.453292	0.498592
17.29	0.241952	0.453949	0.511049
17.3	0.233225	0.457241	0.494614
17.31	0.232933	0.449862	0.506349
17.32	0.243147	0.45528	0.519786
17.33	0.245644	0.455185	0.51215
17.34	0.235851	0.45123	0.499105
17.35	0.246882	0.455855	0.494435
17.36	0.252987	0.460663	0.494665
17.37	0.239727	0.458573	0.50453
17.38	0.24603	0.464799	0.507167
17.39	0.258407	0.456107	0.521458
17.4	0.259887	0.46678	0.50669
17.41	0.239941	0.462458	0.506176
17.42	0.253971	0.460297	0.511034
17.43	0.250374	0.461986	0.515047
17.44	0.240022	0.459736	0.519886
17.45	0.246099	0.454603	0.525331
17.46	0.243576	0.453902	0.525629
17.47	0.261691	0.460529	0.528373
17.48	0.253964	0.465259	0.512955
17.49	0.25087	0.453885	0.510856
17.5	0.245357	0.460005	0.516218
17.51	0.228958	0.46481	0.520771
17.52	0.23535	0.461885	0.509596
17.53	0.249446	0.469781	0.518893
17.54	0.236598	0.46233	0.520253
17.55	0.240653	0.460664	0.50636
17.56	0.242486	0.455034	0.510627
17.57	0.240375	0.450709	0.509897
17.58	0.242145	0.45202	0.535308
17.59	0.244641	0.448597	0.530146
17.6	0.248418	0.454572	0.530052
17.61	0.235497	0.460071	0.531766
17.62	0.226674	0.459027	0.527438
17.63	0.233758	0.455086	0.520497
17.64	0.234902	0.45281	0.523286
17.65	0.23728	0.452657	0.516403
17.66	0.241151	0.4482	0.510458
17.67	0.233355	0.453533	0.512592
17.68	0.234162	0.447706	0.512318
17.69	0.228908	0.450094	0.509302
17.7	0.2353	0.436744	0.51035
17.71	0.2412	0.451228	0.521915
17.72	0.245552	0.451362	0.525872
17.73	0.254236	0.44747	0.516215
17.74	0.24703	0.451346	0.520537
17.75	0.246406	0.449372	0.518354
17.76	0.245259	0.451334	0.519676
17.77	0.237282	0.444032	0.511331
17.78	0.2406	0.451553	0.498191
17.79	0.244792	0.441368	0.505809
17.8	0.254065	0.449983	0.507845
17.81	0.249412	0.454074	0.515079
17.82	0.254117	0.453861	0.513494
17.83	0.261345	0.452103	0.517701
17.84	0.260774	0.461614	0.515741
17.85	0.272163	0.468421	0.505228
17.86	0.259781	0.462361	0.501505
17.87	0.252744	0.459757	0.495042
17.88	0.264251	0.456567	0.505879
17.89	0.264221	0.464447	0.517011
17.9	0.258844	0.467788	0.527306
17.91	0.259602	0.464149	0.519589
17.92	0.275357	0.469105	0.515834
17.93	0.273849	0.457451	0.513167
17.94	0.272788	0.457389	0.508719
17.95	0.266202	0.457813	0.50916
17.96	0.265635	0.457064	0.51484
17.97	0.285256	0.453497	0.504466
17.98	0.276582	0.464201	0.50494
17.99	0.285181	0.462008	0.502697
18	0.275853	0.459327	0.496829
18.01	0.268097	0.463329	0.492251
18.02	0.269293	0.464701	0.512401
18.03	0.261798	0.453397	0.505062
18.04	0.261248	0.452811	0.504164
18.05	0.260987	0.457713	0.509147
18.06	0.259995	0.462865	0.513893
18.07	0.252872	0.449578	0.524382
18.08	0.255686	0.45484	0.521068
18.09	0.263395	0.449046	0.50862
18.1	0.261726	0.451151	0.506846
18.11	0.252945	0.444777	0.519136
18.12	0.255526	0.441116	0.522916
18.13	0.260904	0.4491	0.525466
18.14	0.271657	0.440484	0.519836
18.15	0.26193	0.448313	0.514267
18.16	0.263475	0.443534	0.510386
18.17	0.270145	0.446847	0.501518
18.18	0.255997	0.455508	0.512462
18.19	0.270236	0.447387	0.503439
18.2	0.272824	0.447834	0.496422
18.21	0.264607	0.455269	0.491354
18.22	0.27394	0.449925	0.487315
18.23	0.260814	0.452358	0.492721
18.24	0.260108	0.441675	0.50193
18.25	0.264611	0.437411	0.502224
18.26	0.268776	0.436521	0.508051
18.27	0.275186	0.44732	0.497365
18.28	0.269591	0.443869	0.497582
18.29	0.29063	0.440549	0.487436
18.3	0.281384	0.443421	0.499121
18.31	0.287804	0.450674	0.498829
18.32	0.277496	0.445831	0.498732
18.33	0.281515	0.450339	0.486781
18.34	0.279091	0.44159	0.493584
18.35	0.281254	0.443365	0.486481
18.36	0.291725	0.445305	0.498182
18.37	0.278231	0.446533	0.487204
18.38	0.294146	0.449867	0.491096
18.39	0.296329	0.438373	0.491282
18.4	0.288486	0.437984	0.49631
18.41	0.285305	0.434678	0.489787
18.42	0.273158	0.437323	0.476892
18.43	0.279892	0.437947	0.482731
18.44	0.290866	0.441668	0.492277
18.45	0.275572	0.445019	0.491843
18.46	0.273472	0.451069	0.4914
18.47	0.278953	0.445674	0.488081
18.48	0.297868	0.448192	0.489198
18.49	0.293563	0.44462	0.499005
18.5	0.301268	0.440584	0.507268
18.51	0.300211	0.444091	0.504704
18.52	0.2827	0.439011	0.508877
18.53	0.28884	0.442324	0.511281
18.54	0.296576	0.447878	0.519882
18.55	0.29504	0.448046	0.520207
18.56	0.286939	0.442957	0.518074
18.57	0.300766	0.442863	0.509493
18.58	0.297988	0.445439	0.522824
18.59	0.301475	0.433983	0.50581
18.6	0.291522	0.441165	0.507655
18.61	0.320776	0.443	0.507046
18.62	0.321089	0.447189	0.504466
18.63	0.318242	0.444622	0.507301
18.64	0.310967	0.442868	0.50466
18.65	0.311495	0.442149	0.486006
18.66	0.310607	0.438622	0.485471
18.67	0.300372	0.444625	0.484267
18.68	0.309266	0.441129	0.490318
18.69	0.303219	0.437714	0.491405
18.7	0.304616	0.437496	0.497976
18.71	0.304748	0.435762	0.493159
18.72	0.303191	0.440867	0.497147
18.73	0.314004	0.4349	0.486641
18.74	0.304855	0.435383	0.50736
18.75	0.296095	0.440444	0.493776
18.76	0.293533	0.445777	0.490847
18.77	0.29973	0.440016	0.495028
18.78	0.301627	0.435534	0.494784
18.79	0.309959	0.434679	0.498956
18.8	0.319032	0.439028	0.495154
18.81	0.314305	0.439105	0.4949
18.82	0.323552	0.447064	0.492401
18.83	0.328109	0.445108	0.493605
18.84	0.322847	0.446774	0.50194
18.85	0.323323	0.444813	0.499243
18.86	0.320891	0.438363	0.500799
18.87	0.322467	0.443085	0.497544
18.88	0.337803	0.441536	0.506131
18.89	0.330361	0.448826	0.51769
18.9	0.321127	0.438415	0.499211
18.91	0.308573	0.442227	0.501986
18.92	0.316163	0.443935	0.513652
18.93	0.307739	0.442128	0.496293
18.94	0.318968	0.439543	0.504504
18.95	0.307363	0.4407	0.502369
18.96	0.309151	0.452949	0.508702
18.97	0.316364	0.442732	0.51249
18.98	0.316303	0.444677	0.512859
18.99	0.314122	0.445779	0.512882
19	0.31084	0.44503	0.49765
19.01	0.325104	0.450906	0.495669
19.02	0.323683	0.446512	0.499368
19.03	0.311739	0.445499	0.500165
19.04	0.301242	0.442041	0.50737
19.05	0.297185	0.440995	0.50738
19.06	0.314119	0.44214	0.503581
19.07	0.305993	0.447551	0.504447
19.08	0.297945	0.451344	0.50498
19.09	0.315369	0.452249	0.507897
19.1	0.299384	0.448132	0.509201
19.11	0.313038	0.446781	0.500768
19.12	0.295523	0.440374	0.502259
19.13	0.293352	0.446504	0.506326
19.14	0.301753	0.445529	0.518815
19.15	0.287484	0.447628	0.507797
19.16	0.288268	0.447659	0.513648
19.17	0.290876	0.445911	0.514494
19.18	0.287002	0.441057	0.51767
19.19	0.287201	0.436244	0.521859
19.2	0.281044	0.440464	0.522296
19.21	0.276518	0.444377	0.508719
19.22	0.282524	0.440064	0.515589
19.23	0.294436	0.439458	0.517695
19.24	0.290708	0.437262	0.527645
19.25	0.277357	0.438857	0.522537
19.26	0.283911	0.4396	0.51403
19.27	0.285018	0.435401	0.536738
19.28	0.292765	0.437748	0.53829
19.29	0.294578	0.441148	0.530772
19.3	0.283982	0.444661	0.531854
19.31	0.28907	0.445734	0.523618
19.32	0.28492	0.446156	0.520235
19.33	0.289279	0.445804	0.518644
19.34	0.274449	0.44706	0.523475
19.35	0.288611	0.445572	0.527643
19.36	0.282094	0.44233	0.52481
19.37	0.292573	0.451081	0.530313
19.38	0.282583	0.441712	0.531231
19.39	0.284388	0.443083	0.513026
19.4	0.285106	0.453363	0.500401
19.41	0.287991	0.446293	0.508934
19.42	0.298301	0.447036	0.512593
19.43	0.295325	0.448342	0.512318
19.44	0.280662	0.449314	0.504186
19.45	0.281654	0.445427	0.508947
19.46	0.275815	0.440703	0.501952
19.47	0.285131	0.435211	0.502706
19.48	0.277999	0.438012	0.508583
19.49	0.279042	0.443024	0.512377
19.5	0.276324	0.442602	0.517926
19.51	0.286141	0.443801	0.519593
19.52	0.289458	0.440057	0.520638
19.53	0.27175	0.44461	0.515598
19.54	0.286423	0.449019	0.507473
19.55	0.287074	0.444256	0.50423
19.56	0.293052	0.436435	0.495257
19.57	0.294543	0.432467	0.506938
19.58	0.292133	0.450891	0.507631
19.59	0.29257	0.450511	0.500269
19.6	0.286751	0.450129	0.497543
19.61	0.295118	0.458157	0.506266
19.62	0.284202	0.453062	0.511515
19.63	0.298813	0.444632	0.50594
19.64	0.300597	0.439748	0.511339
19.65	0.273685	0.444648	0.513089
19.66	0.267186	0.451172	0.506347
19.67	0.263734	0.443314	0.496288
19.68	0.277035	0.449435	0.494195
19.69	0.289243	0.448358	0.501668
19.7	0.282666	0.446681	0.497832
19.71	0.293046	0.454985	0.502339
19.72	0.282911	0.450429	0.505596
19.73	0.299268	0.459428	0.507486
19.74	0.289955	0.442472	0.513234
19.75	0.29353	0.44171	0.527097
19.76	0.304837	0.446875	0.528569
19.77	0.290246	0.448973	0.528747
19.78	0.281224	0.440427	0.517243
19.79	0.288047	0.436098	0.513825
19.8	0.293278	0.444381	0.506918
19.81	0.312462	0.440916	0.513123
19.82	0.31241	0.444804	0.506901
19.83	0.322229	0.441696	0.513066
19.84	0.324266	0.442644	0.49434
19.85	0.314037	0.448349	0.506559
19.86	0.322877	0.456185	0.507397
19.87	0.302436	0.443435	0.504718
19.88	0.307449	0.440953	0.484402
19.89	0.312799	0.434973	0.502704
19.9	0.295327	0.4439	0.497698
19.91	0.295078	0.43955	0.501316
19.92	0.306947	0.445379	0.506339
19.93	0.288367	0.44342	0.499086
19.94	0.299687	0.442903	0.493784
19.95	0.31777	0.445174	0.503006
19.96	0.303669	0.444753	0.512261
19.97	0.306763	0.449956	0.502805
19.98	0.303735	0.440114	0.497995
[truncated: 18,002 more rows]
