# Supplementary material for: Dual-specific autophosphorylation of kinase IKK2 enables phosphorylation of substrate IκBα through a phosphoenzyme intermediate
Source: eLife. 2025 Jun 30;13:RP98009. doi: 10.7554/eLife.98009 (PMC12208667; doi:10.7554/eLife.98009)
Supplement: Supplementary file 5. [file elife-98009-supp5.xlsx]

## Sheet: wt_rmsf
Residues	UnP-IKK2	p-IKK2	P-IKK2
16	0.5914	0.3455	0.4156
17	0.3738	0.2235	0.2778
18	0.1827	0.233	0.1942
19	0.1518	0.175	0.1449
20	0.1309	0.1611	0.1067
21	0.1137	0.1525	0.0964
22	0.148	0.1898	0.1146
23	0.1412	0.2084	0.1374
24	0.1495	0.2105	0.13
25	0.1313	0.2013	0.1069
26	0.1068	0.1841	0.0847
27	0.0899	0.1541	0.0711
28	0.0853	0.1308	0.076
29	0.0855	0.1188	0.0743
30	0.0918	0.1041	0.0826
31	0.0976	0.105	0.0924
32	0.1074	0.1078	0.1164
33	0.1497	0.1567	0.1695
34	0.2305	0.2053	0.2277
35	0.3028	0.3039	0.3088
36	0.3903	0.263	0.3187
37	0.3451	0.2397	0.3423
38	0.2982	0.2142	0.3119
39	0.2176	0.1608	0.2596
40	0.1432	0.1207	0.1684
41	0.0939	0.0938	0.1063
42	0.075	0.0766	0.0808
43	0.0699	0.0746	0.0733
44	0.0672	0.0922	0.0754
45	0.0789	0.1198	0.0832
46	0.1034	0.1344	0.0879
47	0.1643	0.158	0.1053
48	0.1481	0.1618	0.163
49	0.1671	0.1782	0.2394
50	0.1489	0.2156	0.2655
51	0.1549	0.2283	0.2762
52	0.151	0.248	0.243
53	0.1407	0.2633	0.1953
54	0.1198	0.2175	0.2423
55	0.1044	0.1707	0.2334
56	0.1062	0.1985	0.1705
57	0.1001	0.2016	0.1532
58	0.0828	0.1534	0.1454
59	0.0845	0.1419	0.1625
60	0.0961	0.1526	0.2304
61	0.0998	0.1366	0.2338
62	0.0937	0.1324	0.2045
63	0.0956	0.1314	0.1826
64	0.0883	0.127	0.1679
65	0.088	0.133	0.1339
66	0.1207	0.1442	0.1463
67	0.1311	0.1547	0.1487
68	0.161	0.1856	0.147
69	0.1371	0.1149	0.1157
70	0.0989	0.0899	0.0943
71	0.0921	0.0864	0.0826
72	0.0666	0.0743	0.0662
73	0.0663	0.0773	0.0617
74	0.074	0.0752	0.0587
75	0.0835	0.0822	0.0676
76	0.0817	0.0897	0.0819
77	0.0869	0.1105	0.0939
78	0.1037	0.1356	0.1159
79	0.1102	0.1302	0.1272
80	0.134	0.1352	0.1758
81	0.194	0.1651	0.2427
82	0.2047	0.2235	0.2829
83	0.1952	0.2252	0.2569
84	0.3285	0.1853	0.2874
85	0.3762	0.2307	0.2799
86	0.3036	0.3579	0.3349
87	0.3253	0.3638	0.3464
88	0.3434	0.3739	0.3695
89	0.236	0.2932	0.3301
90	0.1678	0.2425	0.2822
91	0.1221	0.2068	0.1925
92	0.1051	0.1568	0.1446
93	0.0897	0.1015	0.1071
94	0.0808	0.0821	0.0883
95	0.0801	0.0764	0.0798
96	0.0772	0.0717	0.0702
97	0.0809	0.0739	0.0687
98	0.0855	0.0742	0.0761
99	0.0875	0.0913	0.0748
100	0.0985	0.121	0.0817
101	0.0897	0.1445	0.0882
102	0.0815	0.1643	0.0789
103	0.0752	0.1603	0.0649
104	0.0689	0.1172	0.0576
105	0.075	0.1377	0.0619
106	0.0823	0.1437	0.0715
107	0.0814	0.1131	0.0724
108	0.0804	0.1048	0.0707
109	0.0954	0.1381	0.0848
110	0.1076	0.1419	0.0981
111	0.1319	0.1661	0.1196
112	0.134	0.1585	0.1214
113	0.1071	0.1299	0.0986
114	0.1056	0.125	0.1033
115	0.1098	0.1097	0.095
116	0.0873	0.0898	0.0781
117	0.0917	0.083	0.0793
118	0.1227	0.1156	0.1072
119	0.1062	0.1212	0.1208
120	0.1291	0.1092	0.1202
121	0.1263	0.0831	0.1069
122	0.0881	0.0644	0.0841
123	0.0826	0.0635	0.069
124	0.0942	0.0655	0.073
125	0.0837	0.0624	0.0671
126	0.0629	0.0592	0.0578
127	0.0653	0.0603	0.0577
128	0.0676	0.0662	0.0604
129	0.0646	0.0645	0.0651
130	0.0646	0.0605	0.0688
131	0.0696	0.0632	0.0729
132	0.0671	0.063	0.0708
133	0.068	0.0617	0.0701
134	0.0739	0.0649	0.0794
135	0.0742	0.0669	0.0792
136	0.073	0.0664	0.0738
137	0.0789	0.0759	0.0809
138	0.0905	0.0891	0.0903
139	0.0975	0.0857	0.0918
140	0.0962	0.0792	0.0915
141	0.084	0.0632	0.0806
142	0.0779	0.0616	0.0753
143	0.0714	0.0599	0.0666
144	0.0719	0.0675	0.0692
145	0.0709	0.0738	0.0747
146	0.064	0.0709	0.0735
147	0.069	0.077	0.0634
148	0.069	0.0832	0.0573
149	0.0684	0.0937	0.0575
150	0.066	0.0828	0.0581
151	0.0632	0.0804	0.0529
152	0.065	0.0866	0.0554
153	0.074	0.1036	0.0648
154	0.1209	0.1104	0.0764
155	0.1636	0.1501	0.1061
156	0.1643	0.1797	0.1361
157	0.1867	0.2348	0.184
158	0.1747	0.2255	0.1878
159	0.1444	0.1717	0.1438
160	0.1212	0.1331	0.1091
161	0.08	0.1017	0.073
162	0.0702	0.0806	0.059
163	0.0618	0.0746	0.0537
164	0.0586	0.074	0.0531
165	0.0602	0.0728	0.0545
166	0.0723	0.0781	0.0633
167	0.0803	0.0861	0.0682
168	0.0934	0.1421	0.0717
169	0.0876	0.1021	0.0708
170	0.0833	0.0818	0.0708
171	0.0899	0.0814	0.0752
172	0.0943	0.1051	0.1052
173	0.1208	0.1469	0.1797
174	0.1623	0.1978	0.2535
175	0.1687	0.1924	0.2368
176	0.2094	0.1435	0.1662
177	0.2715	0.1152	0.1222
178	0.4347	0.1202	0.1341
179	0.414	0.1133	0.0933
180	0.3214	0.1088	0.0858
181	0.262	0.1232	0.0992
182	0.2125	0.1562	0.1417
183	0.2231	0.1678	0.181
184	0.2194	0.179	0.1745
185	0.1617	0.1669	0.1509
186	0.1088	0.1599	0.1285
187	0.0954	0.1475	0.1116
188	0.0881	0.102	0.0982
189	0.0919	0.09	0.1219
190	0.0845	0.0944	0.1293
191	0.109	0.1085	0.1427
192	0.113	0.096	0.1461
193	0.104	0.0993	0.147
194	0.1249	0.1227	0.1665
195	0.145	0.1794	0.193
196	0.142	0.2348	0.1816
197	0.1652	0.1893	0.1857
198	0.1601	0.1261	0.1409
199	0.1628	0.1004	0.1369
200	0.1136	0.0862	0.1306
201	0.088	0.0911	0.1073
202	0.0788	0.0849	0.0871
203	0.0704	0.0684	0.0788
204	0.0642	0.058	0.068
205	0.0642	0.0579	0.0645
206	0.0623	0.0573	0.0661
207	0.0593	0.0581	0.0642
208	0.0571	0.0549	0.0564
209	0.0589	0.0536	0.0583
210	0.0633	0.0544	0.0622
211	0.0638	0.0537	0.0579
212	0.0645	0.0525	0.0552
213	0.0686	0.0538	0.06
214	0.0714	0.0546	0.0635
215	0.0733	0.0575	0.0644
216	0.0765	0.0642	0.0699
217	0.0845	0.0712	0.0733
218	0.0867	0.0778	0.0792
219	0.109	0.0977	0.1076
220	0.1315	0.0862	0.171
221	0.1292	0.0802	0.1881
222	0.1334	0.0809	0.1155
223	0.1538	0.1063	0.1211
224	0.189	0.2075	0.1121
225	0.1701	0.2068	0.1787
226	0.1289	0.1947	0.2825
227	0.1414	0.2111	0.4198
228	0.136	0.2071	0.4835
229	0.1461	0.2112	0.5041
230	0.1555	0.181	0.3504
231	0.1638	0.1489	0.2845
232	0.1776	0.138	0.3151
233	0.1953	0.148	0.2937
234	0.2281	0.145	0.2349
235	0.2536	0.1236	0.2466
236	0.2502	0.1264	0.3001
237	0.2422	0.1498	0.2816
238	0.2234	0.1376	0.3276
239	0.2396	0.1565	0.2937
240	0.2738	0.1544	0.3079
241	0.2229	0.1371	0.2906
242	0.1597	0.1359	0.2188
243	0.1243	0.111	0.2524
244	0.1157	0.0805	0.21
245	0.1633	0.1043	0.1505
246	0.2342	0.159	0.1632
247	0.3287	0.2276	0.2288
248	0.4182	0.2727	0.2929
249	0.551	0.3729	0.4119
250	0.5917	0.3653	0.4115
251	0.5196	0.3249	0.3377
252	0.4349	0.2539	0.2436
253	0.3461	0.1794	0.1563
254	0.2714	0.1216	0.1352
255	0.2042	0.0983	0.1637
256	0.1279	0.0947	0.1741
257	0.1078	0.1052	0.1796
258	0.1121	0.0917	0.1492
259	0.1183	0.091	0.133
260	0.1395	0.1021	0.1512
261	0.1513	0.1186	0.1697
262	0.1425	0.1131	0.1621
263	0.1282	0.1084	0.1397
264	0.1318	0.1954	0.1352
265	0.12	0.2195	0.1248
266	0.1229	0.2081	0.1376
267	0.1263	0.1914	0.1497
268	0.1239	0.165	0.1465
269	0.1011	0.1142	0.118
270	0.0879	0.1077	0.1091
271	0.0929	0.1053	0.1151
272	0.0918	0.0963	0.1042
273	0.0766	0.0799	0.0902
274	0.0708	0.0773	0.0997
275	0.076	0.0813	0.1074
276	0.0739	0.0708	0.0876
277	0.0674	0.0634	0.0889
278	0.0677	0.0783	0.1189
279	0.0753	0.086	0.1179
280	0.0756	0.0687	0.1065
281	0.0765	0.0714	0.1272
282	0.1178	0.0993	0.1621
283	0.1323	0.172	0.201
284	0.2072	0.1991	0.2119
285	0.2423	0.2471	0.3143
286	0.2562	0.3419	0.3006
290	0.3732	0.3827	0.2788
291	0.4943	0.3655	0.2978
292	0.633	0.3117	0.3582
293	0.7329	0.312	0.4305
294	0.5877	0.2538	0.3838
295	0.4932	0.1797	0.3564
296	0.3787	0.157	0.3534
297	0.2665	0.1595	0.3027
298	0.1347	0.1703	0.1768
299	0.1058	0.14	0.1109
300	0.0922	0.0859	0.1027
301	0.1037	0.0861	0.108
302	0.094	0.0842	0.0887
303	0.0812	0.0738	0.0759
304	0.0964	0.0821	0.087
305	0.1056	0.0925	0.0977
306	0.0991	0.0886	0.0978
307	0.1117	0.0954	0.1048
308	0.1347	0.1148	0.1448
309	0.1732	0.1607	0.2146
310	0.2728	0.3496	0.3525
