# Supplementary material for: Dual-specific autophosphorylation of kinase IKK2 enables phosphorylation of substrate IκBα through a phosphoenzyme intermediate
Source: eLife. 2025 Jun 30;13:RP98009. doi: 10.7554/eLife.98009 (PMC12208667; doi:10.7554/eLife.98009)
Supplement: Supplementary file 6. [file elife-98009-supp6.xlsx]

## Sheet: pikba-ikba plot
Lane number	pikba/ikba
1	0
2	0
3	1
4	1.12373
5	21.6858
6	34.943
7	39.8454
8	56.9949
9	96.8164

## Sheet: pYikk2-ikk2 plot
Lane number	pYikk2/ikk2
1	1
2	0.84614
3	0.666732
4	0.573791
5	0.711634
6	0.629962
7	0.779489
8	0.714441
9	2.17459
