# Supplementary material for: Dual-specific autophosphorylation of kinase IKK2 enables phosphorylation of substrate IκBα through a phosphoenzyme intermediate
Source: eLife. 2025 Jun 30;13:RP98009. doi: 10.7554/eLife.98009 (PMC12208667; doi:10.7554/eLife.98009)
Supplement: Supplementary file 7. [file elife-98009-supp7.xlsx]

## Sheet: Sheet1
IKK2 +ADP		IKK2+ATP
T	Cp	T	Cp
25	-0.352	29	0.01
25.29	-0.2263	29.39	-0.0087413
25.58	-0.1004	29.78	-0.0273
25.87	0.0256	30.17	-0.0457
26.16	0.1521	30.56	-0.0637
26.45	0.279	30.95	-0.0816
26.74	0.4189	31.34	-0.0772
27.03	0.5984	31.73	-0.0416
27.32	0.8116	32.12	0.0327
27.61	1.0433	32.51	0.1494
27.9	1.2956	32.9	0.2889
28.19	1.5649	33.29	0.461
28.48	1.8459	33.68	0.6864
28.77	2.1345	34.07	0.9746
29.06	2.4316	34.46	1.3116
29.35	2.7204	34.85	1.6941
29.64	3.0098	35.24	2.0966
29.93	3.3018	35.63	2.5131
30.22	3.5954	36.02	2.928
30.51	3.8985	36.41	3.3434
30.8	4.2162	36.8	3.7641
31.09	4.5387	37.19	4.1712
31.38	4.8667	37.58	4.5517
31.67	5.2014	37.97	4.863
31.96	5.5378	38.36	5.1095
32.25	5.8727	38.75	5.2834
32.54	6.2307	39.14	5.3858
32.83	6.588	39.53	5.4409
33.12	6.936	39.92	5.4635
33.41	7.286	40.31	5.4738
33.7	7.6344	40.7	5.4694
33.99	7.9882	41.09	5.4901
34.28	8.3539	41.48	5.5534
34.57	8.7267	41.87	5.7144
34.86	9.1104	42.26	5.9837
35.15	9.4941	42.65	6.3763
35.44	9.9071	43.04	6.8941
35.73	10.3489	43.43	7.5058
36.02	10.8286	43.82	8.2047
36.31	11.3317	44.21	8.9724
36.6	11.856	44.6	9.8147
36.89	12.4044	44.99	10.7034
37.18	12.9717	45.38	11.6265
37.47	13.551	45.77	12.5508
37.76	14.1357	46.16	13.4538
38.05	14.7068	46.55	14.3331
38.34	15.26	46.94	15.1667
38.63	15.7827	47.33	15.9703
38.92	16.2578	47.72	16.7362
39.21	16.6714	48.11	17.4652
39.5	17.017	48.5	18.1405
39.79	17.2853	48.89	18.7374
40.08	17.4668	49.28	19.2395
40.37	17.539	49.67	19.6339
40.66	17.4639	50.06	19.9214
40.95	17.2431	50.45	20.0826
41.24	16.8299	50.84	20.0866
41.53	16.221	51.23	19.8992
41.82	15.4144	51.62	19.4865
42.11	14.4236	52.01	18.8133
42.4	13.2637	52.4	17.8606
42.69	11.9415	52.79	16.6396
42.98	10.5007	53.18	15.1523
43.27	9.0044	53.57	13.4475
43.56	7.516	53.96	11.5718
43.85	6.073	54.35	9.5953
44.14	4.7742	54.74	7.7108
44.43	3.6233	55.13	5.9527
44.72	2.6489	55.52	4.3731
45.01	1.8615	55.91	3.0206
45.3	1.2477	56.3	1.9347
45.59	0.7972	56.69	1.1218
45.88	0.4746	57.08	0.5756
46.17	0.2408	57.47	0.234
46.46	0.0776	57.86	0.0557
46.75	-0.0228	58.25	-0.0601
47.04	-0.1052	58.64	-0.1412
47.33	-0.1595	59.03	-0.1868
47.62	-0.1915	59.42	-0.2022
47.91	-0.2131	59.81	-0.1907
48.2	-0.2243	60.2	-0.1774
48.49	-0.2222	60.59	-0.1615
48.78	-0.2118	60.98	-0.1451
49.07	-0.1916	61.37	-0.1084
49.36	-0.164	61.76	-0.0635
49.65	-0.1398	62.15	-0.012
49.94	-0.1186	62.54	0.0352
50.23	-0.0907	62.93	0.0597
50.52	-0.0633	63.32	0.0697
50.81	-0.0385	63.71	0.0662
51.1	-0.0119	64.1	0.0727
51.39	0.009061	64.49	0.0817
51.68	0.0228	64.88	0.0966
51.97	0.0407	65.27	0.1019
52.26	0.0544	65.66	0.1023
52.55	0.0548	66.05	0.1032
52.84	0.0341	66.44	0.112
53.13	0.0043445	66.83	0.1246
53.42	-0.0242	67.22	0.1365
53.71	-0.0518	67.61	0.148
54	-0.0785	68	0.1593
