# Supplementary figures and images for: Dual-specific autophosphorylation of kinase IKK2 enables phosphorylation of substrate IκBα through a phosphoenzyme intermediate
Source: eLife journal article supplement (doi:10.7554/elife.98009), 2024-06-20

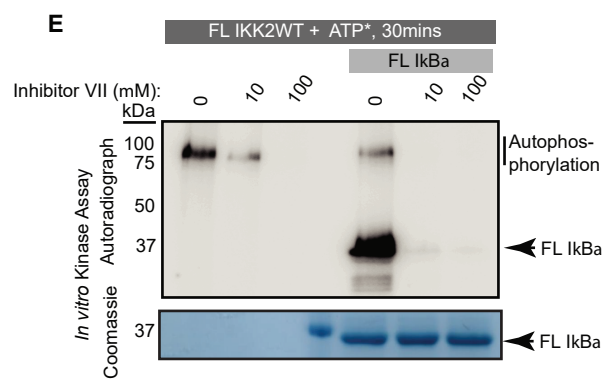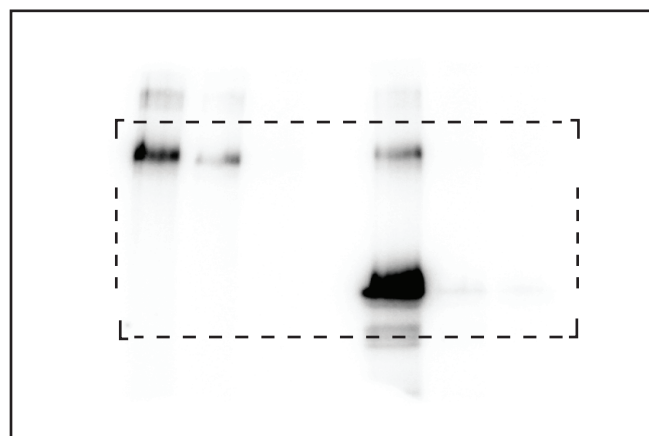

Autoradiograph

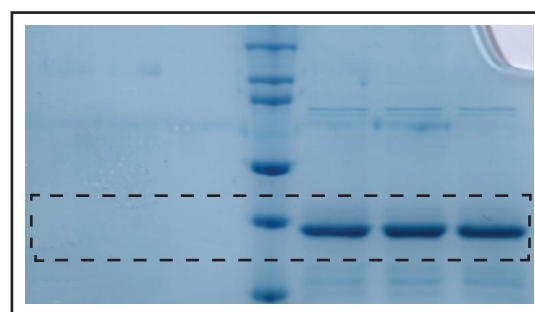

Coomassie

Supplement: fig1-data2 [file elife-98009-fig1-data2-v1.zip]

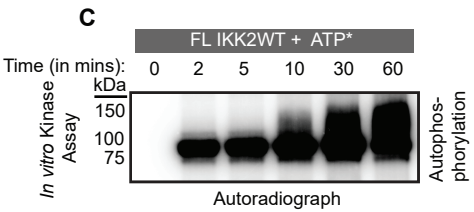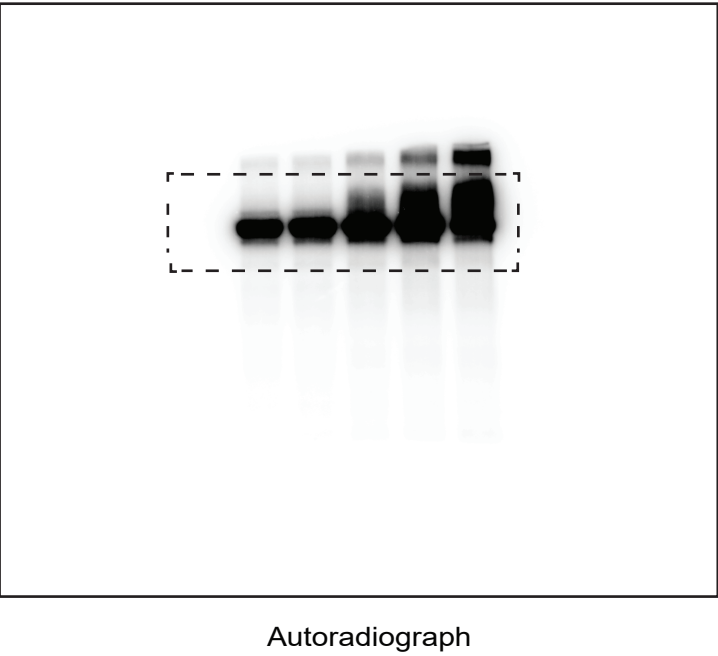

Supplement: fig1-data2 [file elife-98009-fig1-data2-v1.zip]

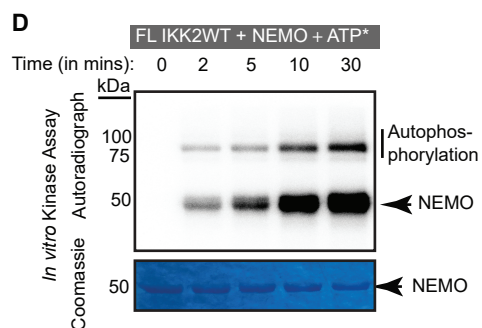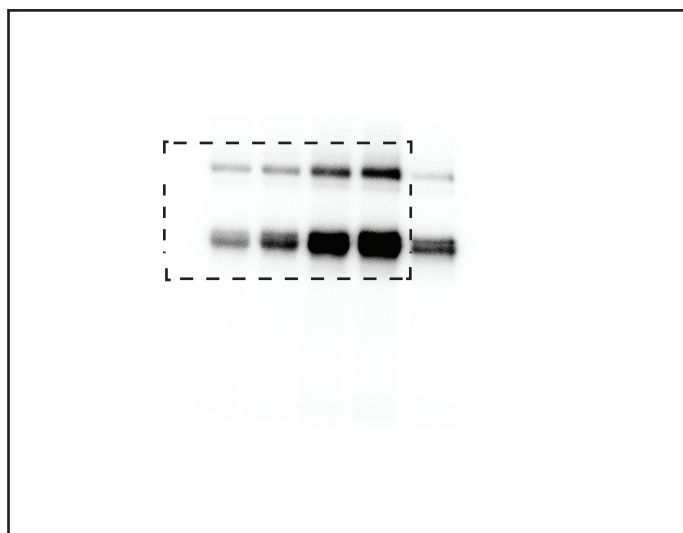

Autoradiograph

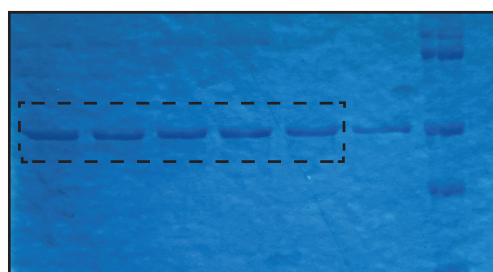

Coomassie

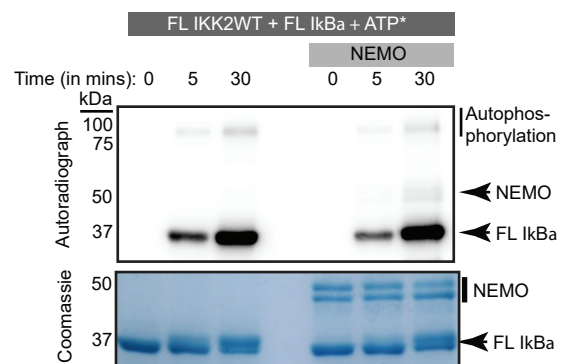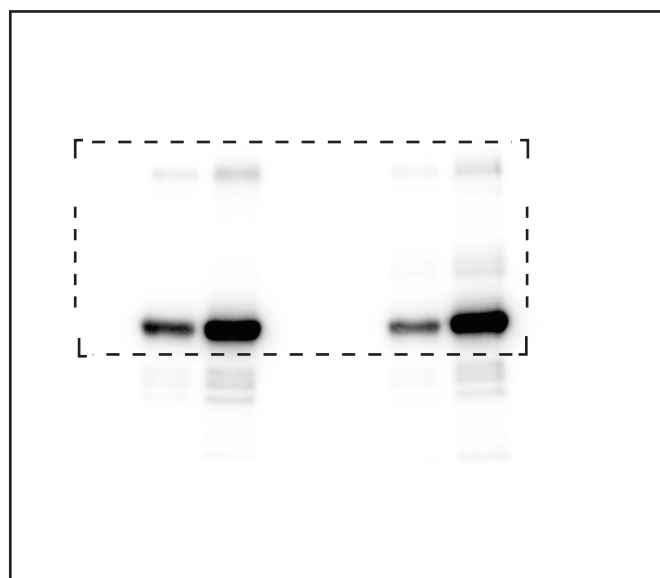

Autoradiograph

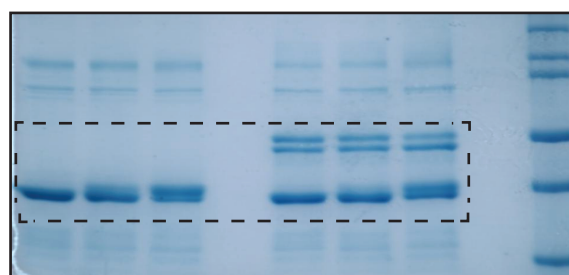

Coomassie

Supplement: fig1-data2 [file elife-98009-fig1-data2-v1.zip]

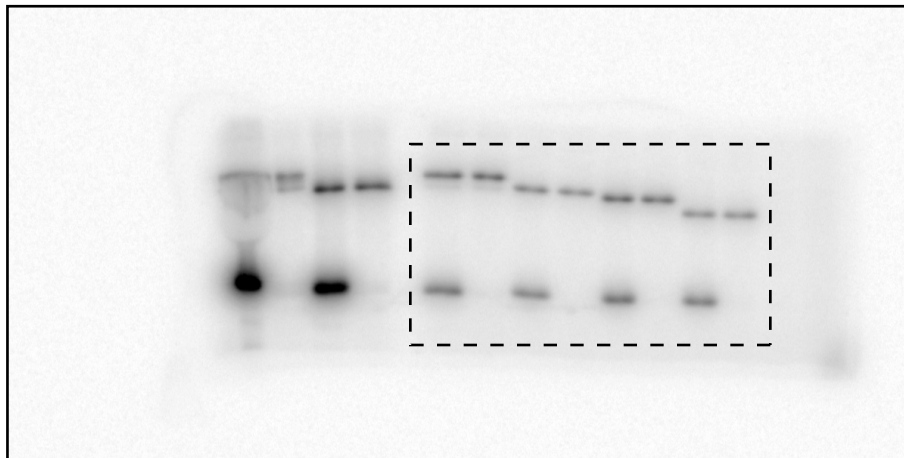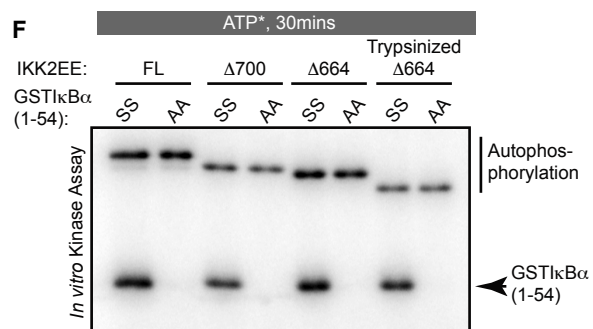

Supplement: fig1-data2 [file elife-98009-fig1-data2-v1.zip]

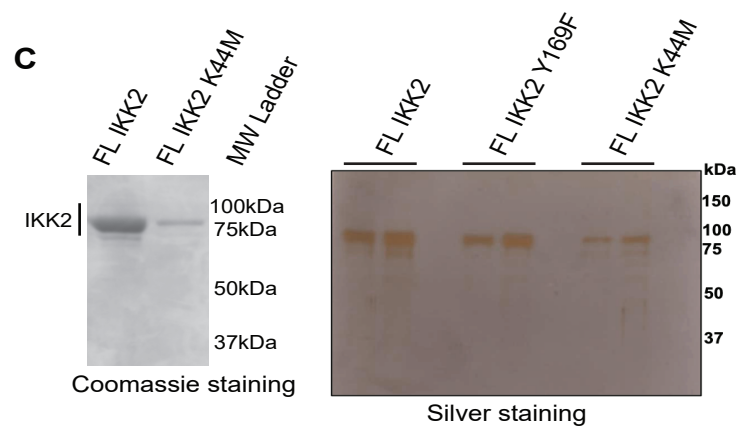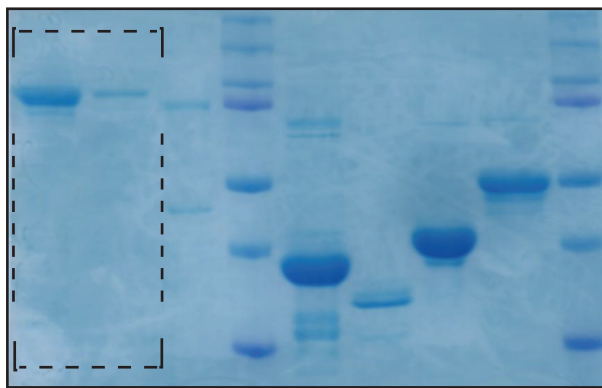

Coomassie staining

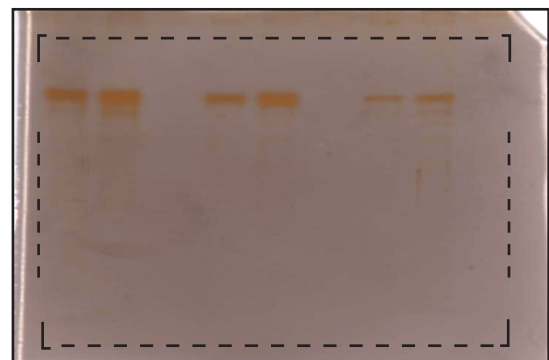

Silver staining

Supplement: fig1-figsupp1-data2 [file elife-98009-fig1-figsupp1-data2-v1.zip]

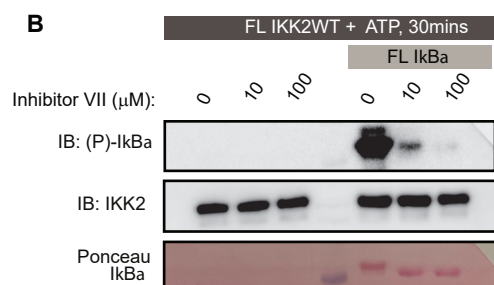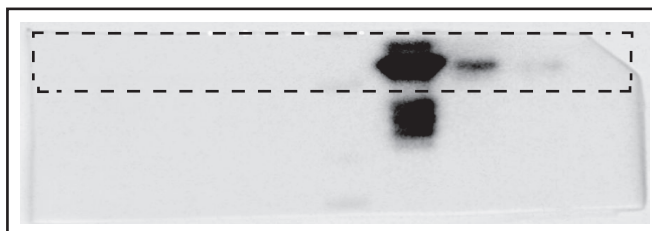

IB: (P)-IκBa

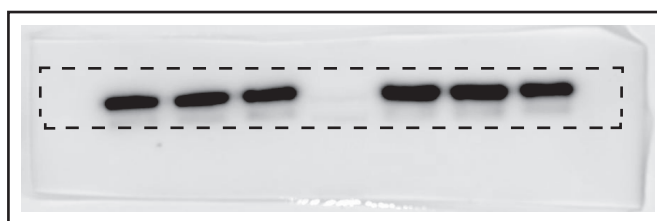

IB: IKK2

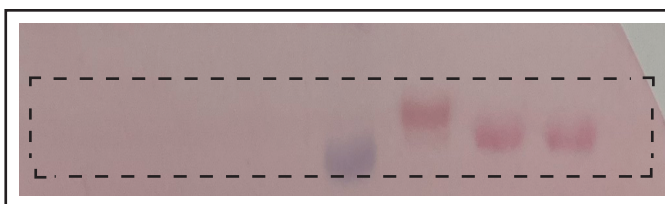

Ponceau IκBa

Supplement: fig1-figsupp1-data2 [file elife-98009-fig1-figsupp1-data2-v1.zip]

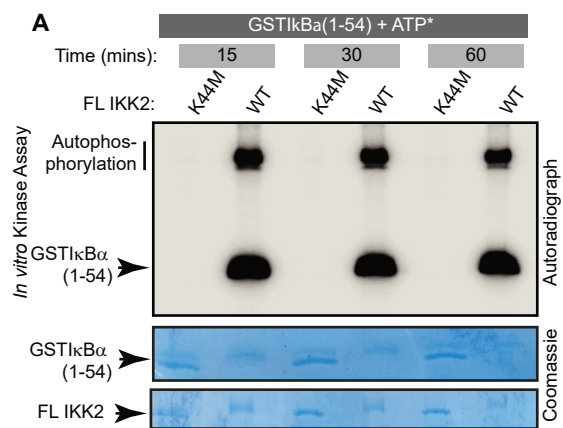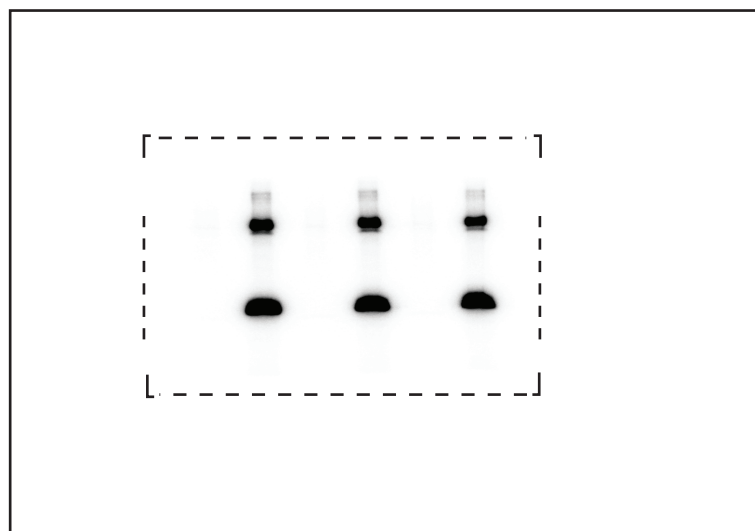

Autoradiograph

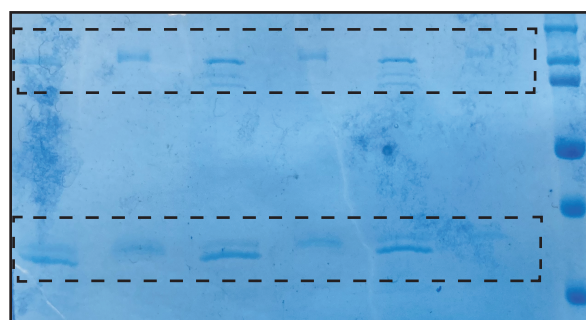

Coomassie

Supplement: fig1-figsupp1-data2 [file elife-98009-fig1-figsupp1-data2-v1.zip]

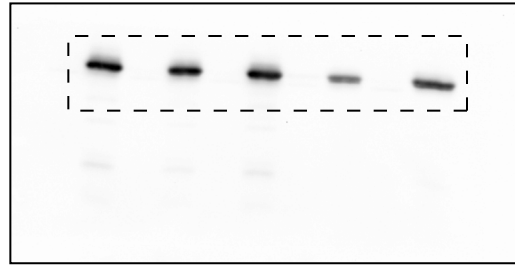

IB: (P)-IκBα

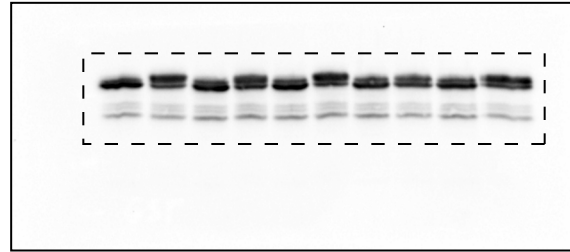

IB: GST

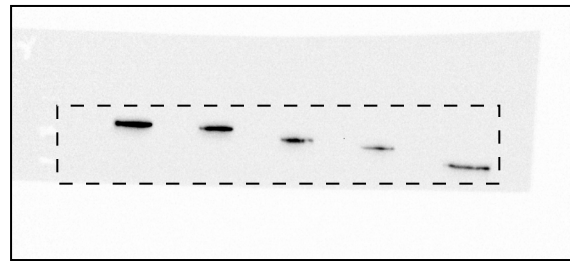

IB: (P)-Tyr

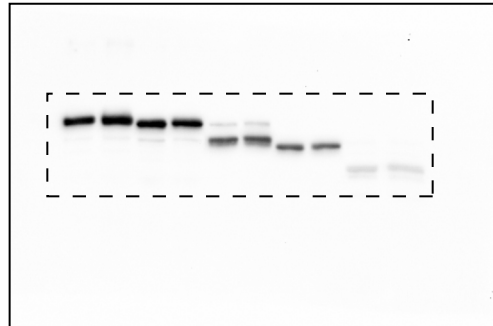

IB: IKK1/2

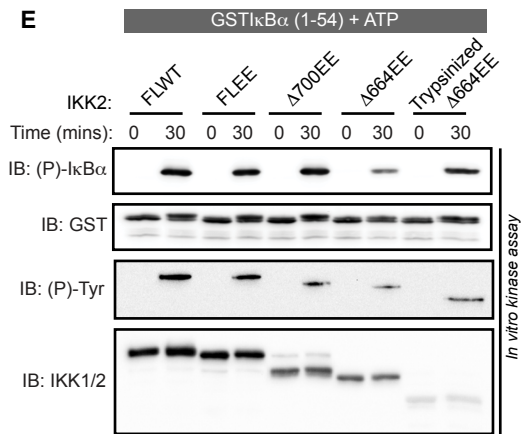

Supplement: fig2-data2 [file elife-98009-fig2-data2-v1.zip]

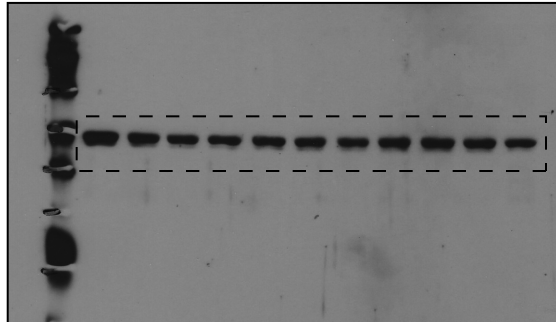

IB: (P)-Ser

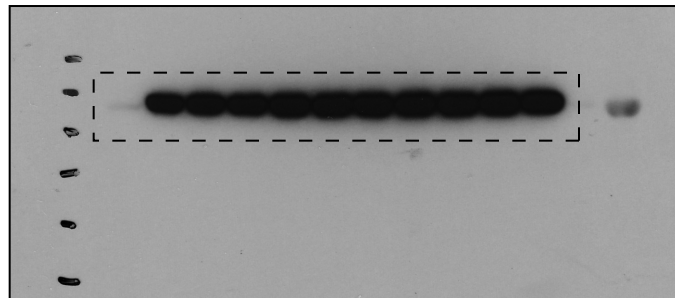

IB: (P)-Tyr

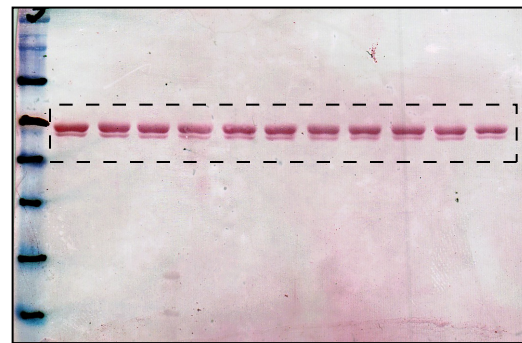

Ponceau

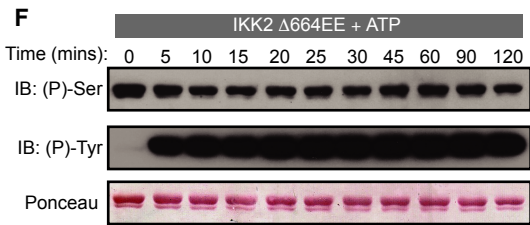

Supplement: fig2-data2 [file elife-98009-fig2-data2-v1.zip]

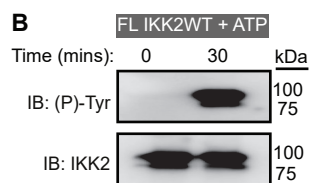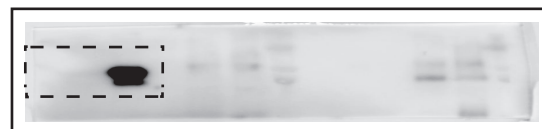

IB: (P)-Tyr

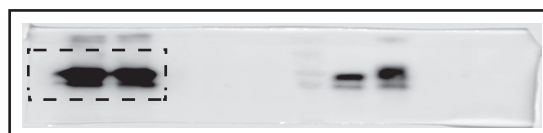

IB: IKK2

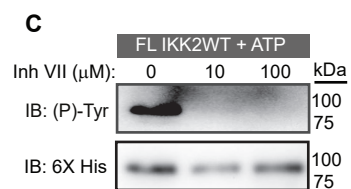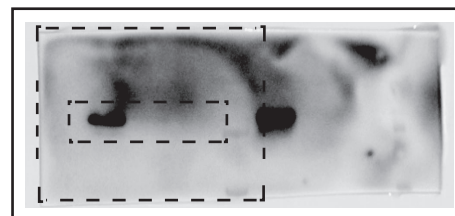

IB: (P)-Tyr

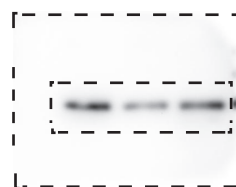

IB: 6X His

Supplement: fig2-data2 [file elife-98009-fig2-data2-v1.zip]

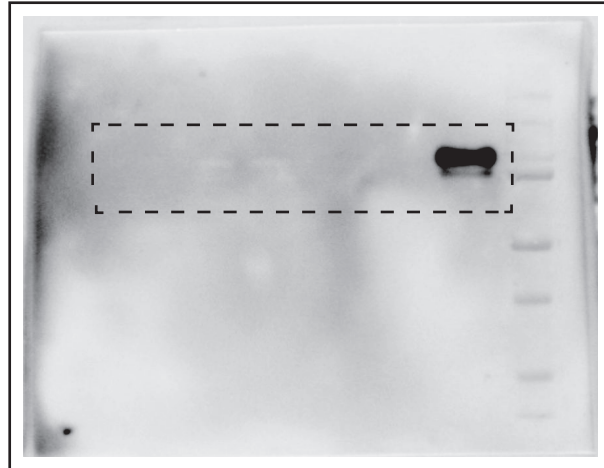

IB: (P)-Tyr

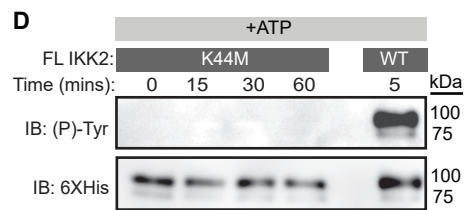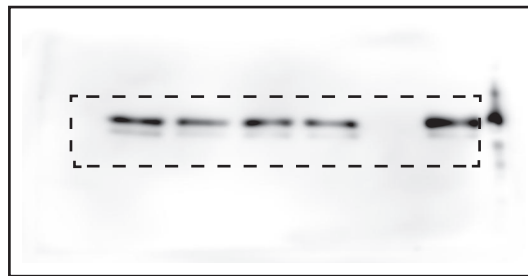

IB: 6XHis

Supplement: fig2-data2 [file elife-98009-fig2-data2-v1.zip]

**G**

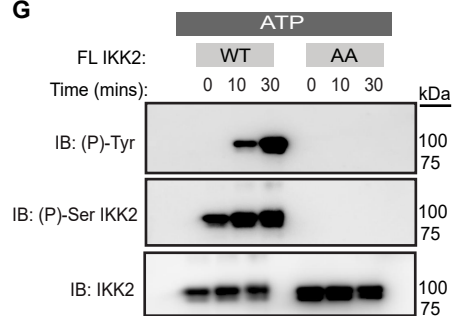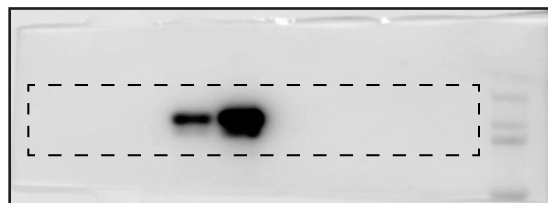

IB: (P)-Tyr

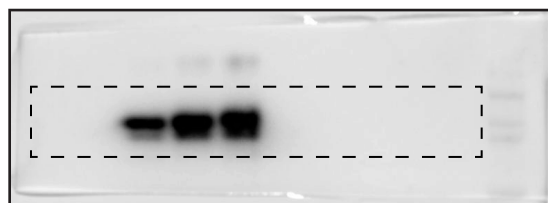

IB: (P)-Ser IKK2

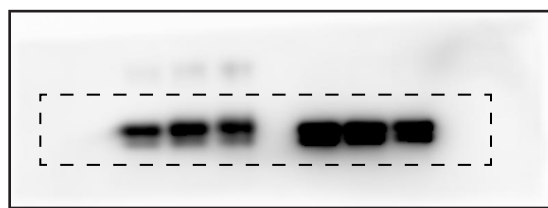

IB: IKK2

Supplement: fig2-data2 [file elife-98009-fig2-data2-v1.zip]

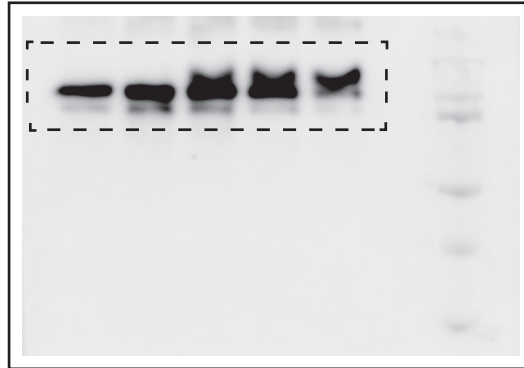

IB: (P)-Ser IKK2

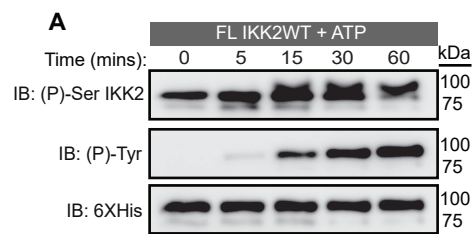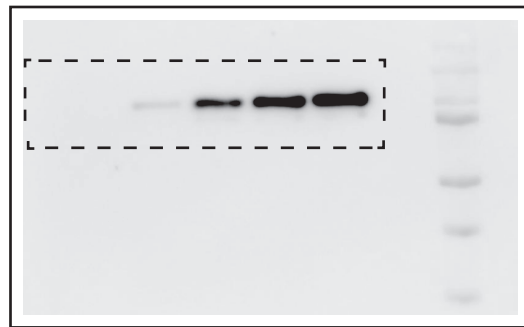

IB: (P)-Tyr

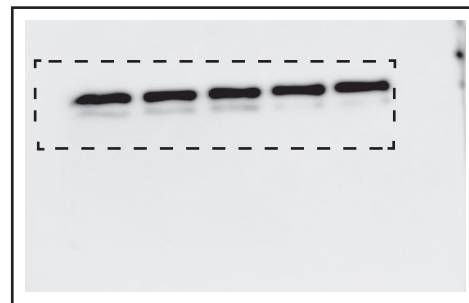

IB: 6XHis

Supplement: fig2-data2 [file elife-98009-fig2-data2-v1.zip]

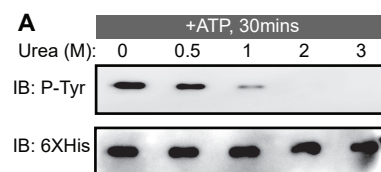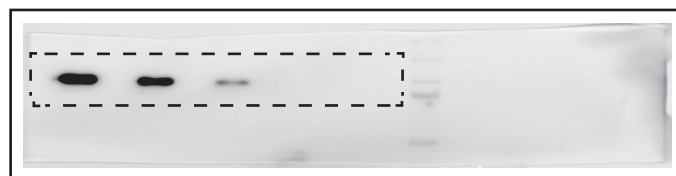

IB: P-Tyr

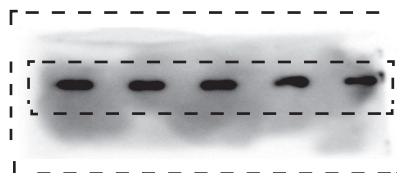

IB: 6XHis

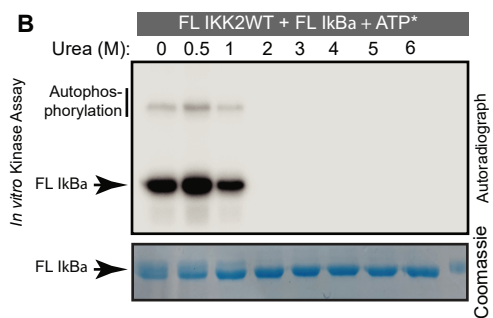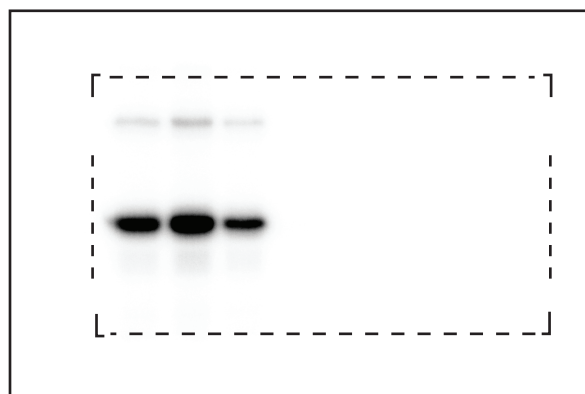

Autoradiograph

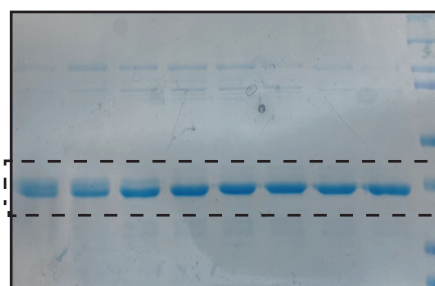

Coomassie

Supplement: fig2-figsupp1-data2 [file elife-98009-fig2-figsupp1-data2-v1.zip]

D

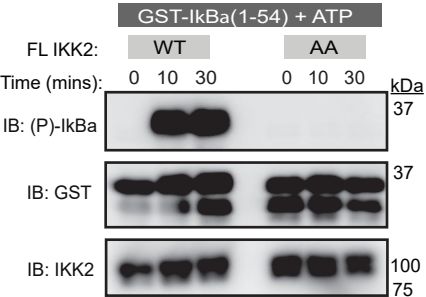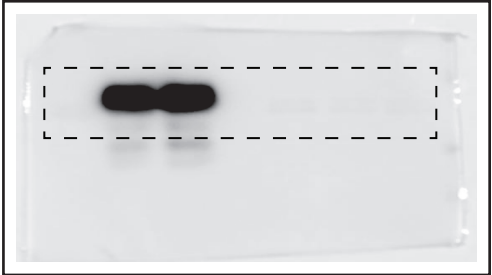

IB: (P)-IkBa

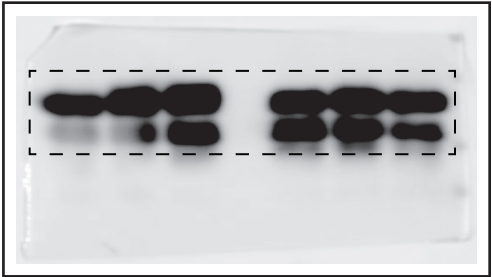

IB: GST

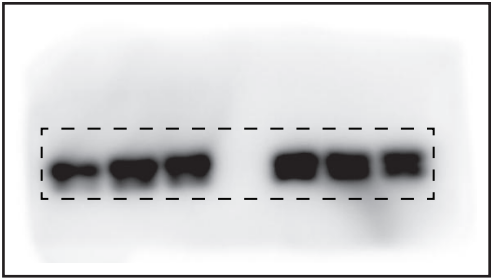

IB: IKK2

Supplement: fig2-figsupp1-data2 [file elife-98009-fig2-figsupp1-data2-v1.zip]

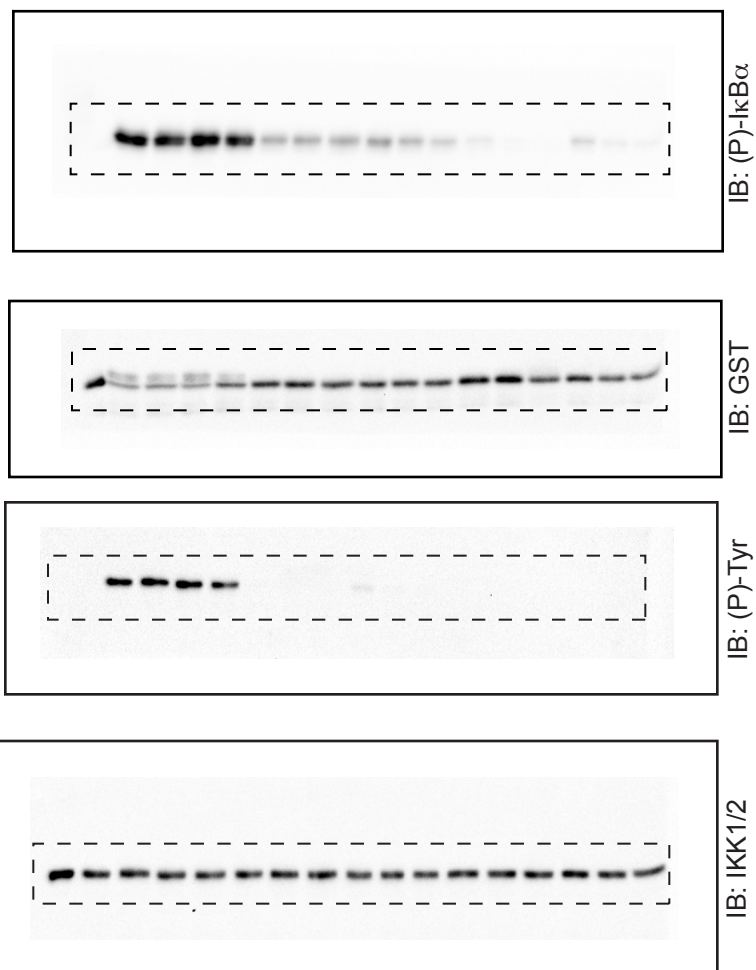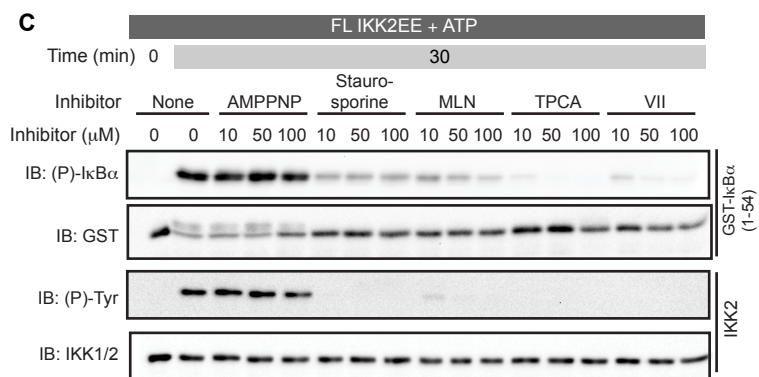

Supplement: fig2-figsupp1-data2 [file elife-98009-fig2-figsupp1-data2-v1.zip]

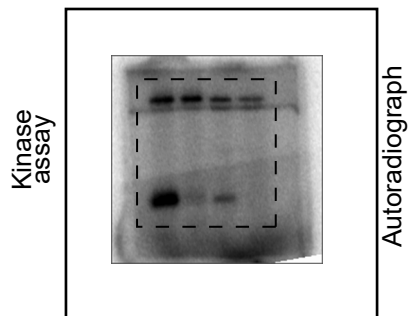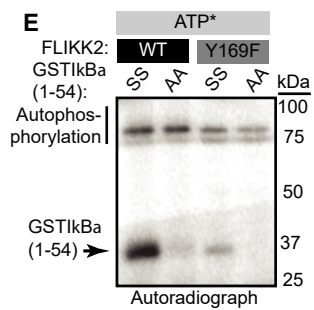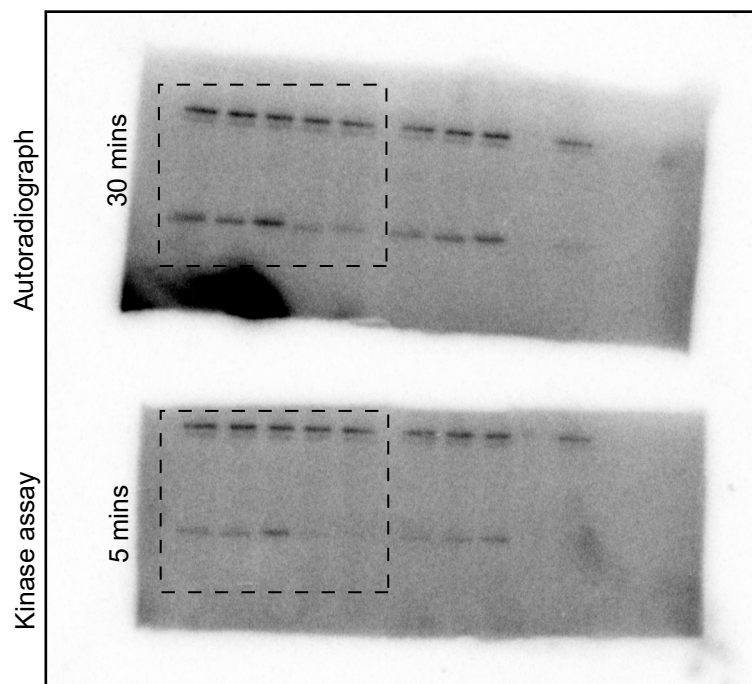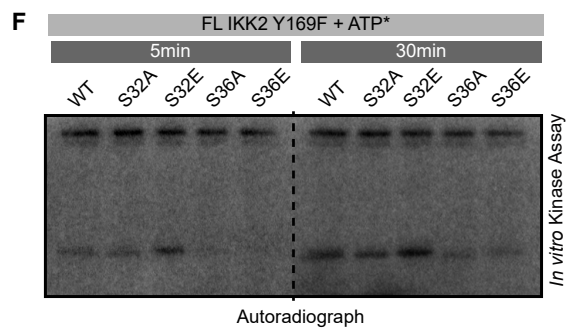

Supplement: fig3-data2 [file elife-98009-fig3-data2-v1.zip]

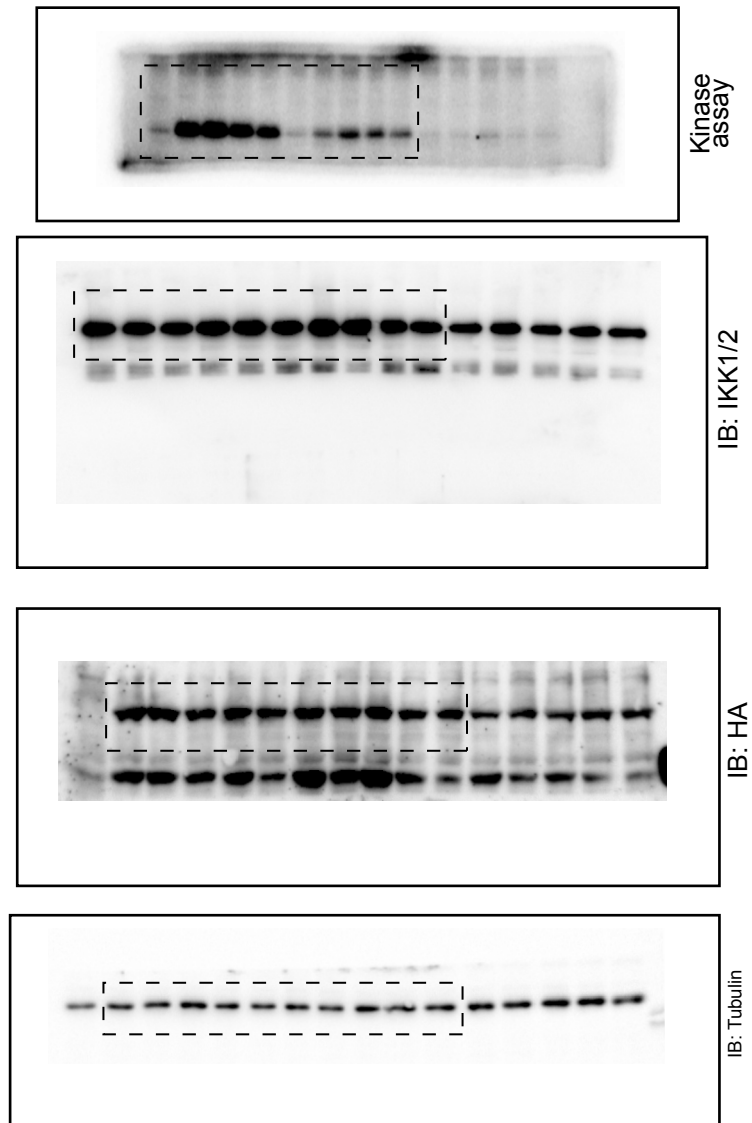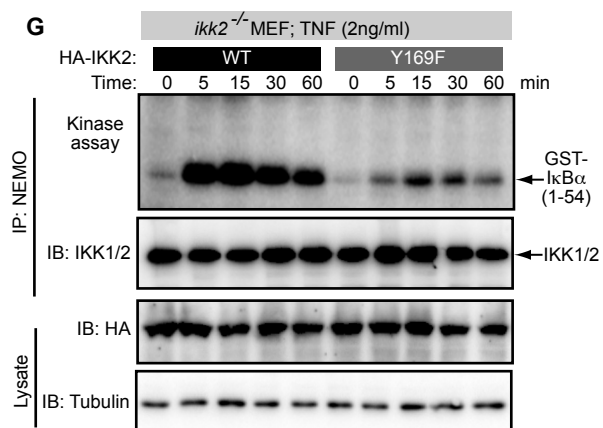

Supplement: fig3-data2 [file elife-98009-fig3-data2-v1.zip]

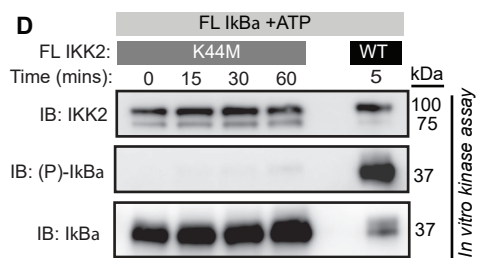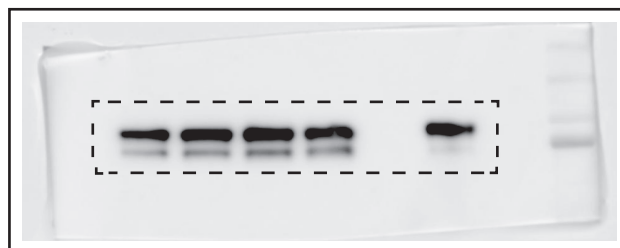

IB: IKK2

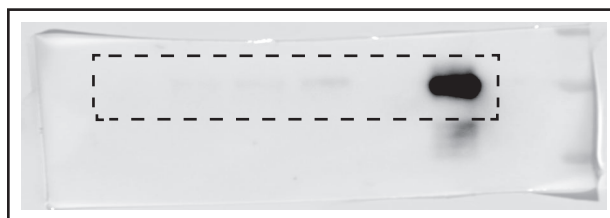

IB: (P)-IκBa

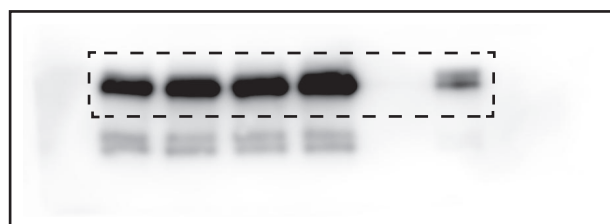

IB: IκBa

Supplement: fig3-data2 [file elife-98009-fig3-data2-v1.zip]

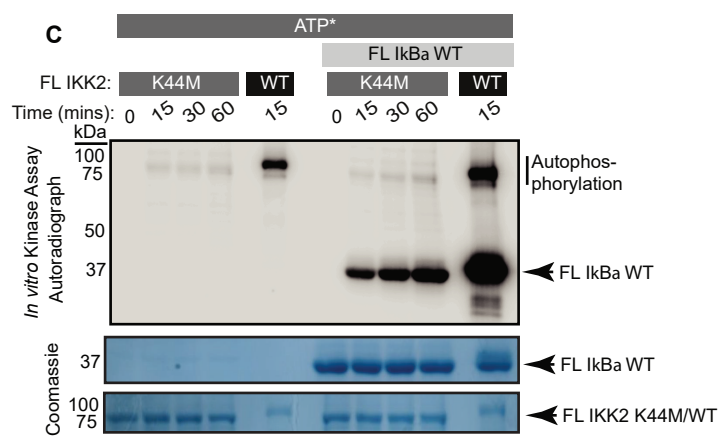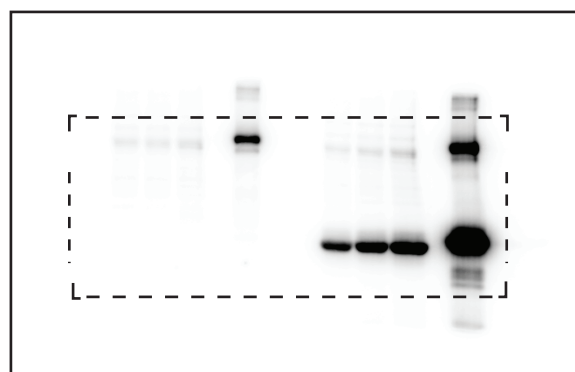

Autoradiograph

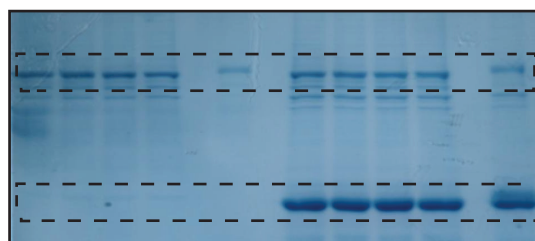

Coomassie

Supplement: fig3-data2 [file elife-98009-fig3-data2-v1.zip]

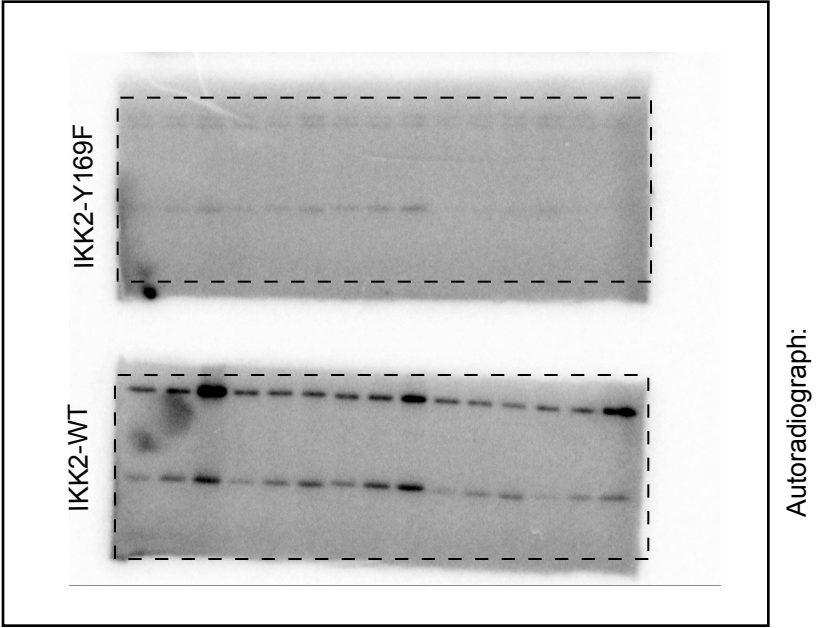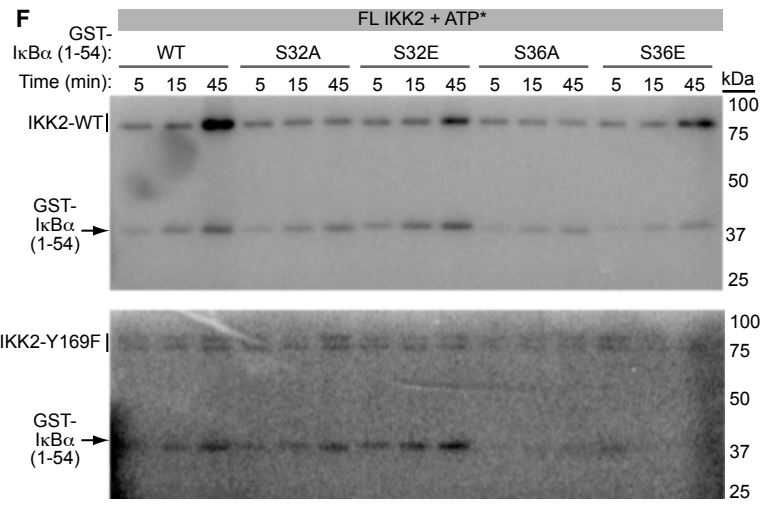

Autoradiograph: *In vitro* Kinase Assay

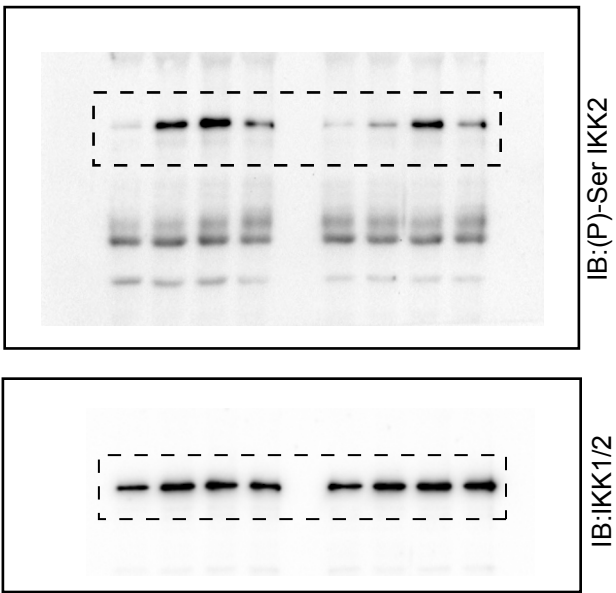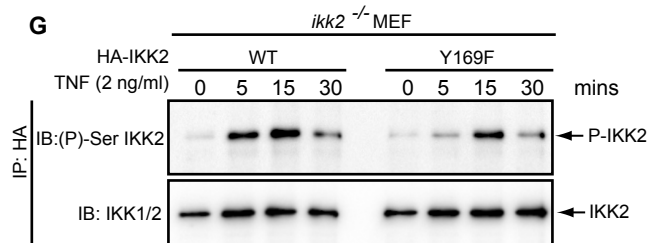

Supplement: fig3-figsupp1-data2 [file elife-98009-fig3-figsupp1-data2-v1.zip]

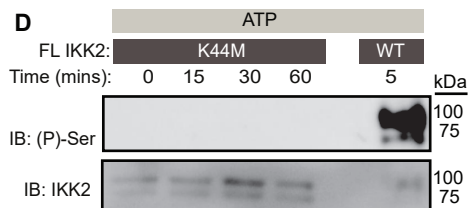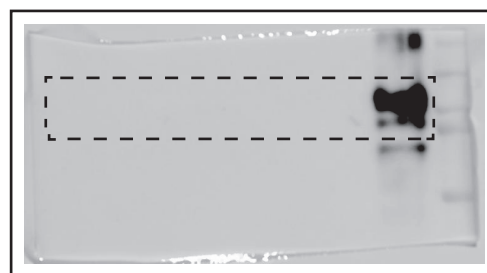

IB: (P)-Ser

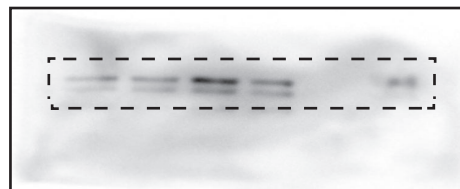

IB: IKK2

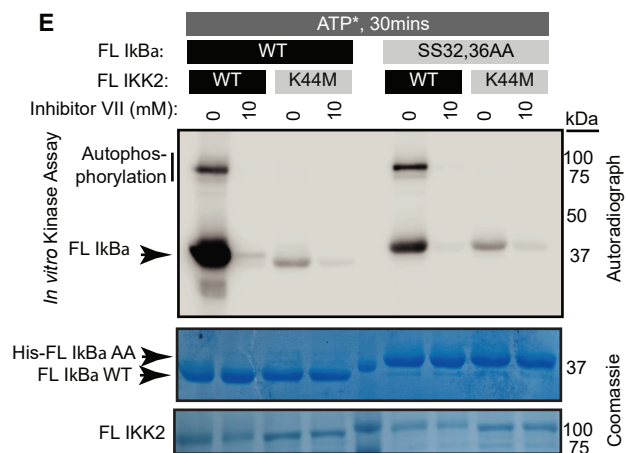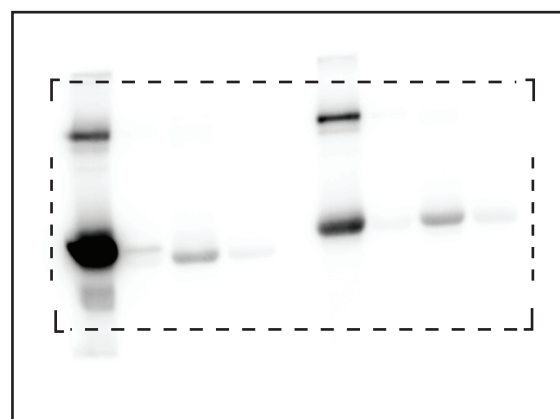

Autoradiograph

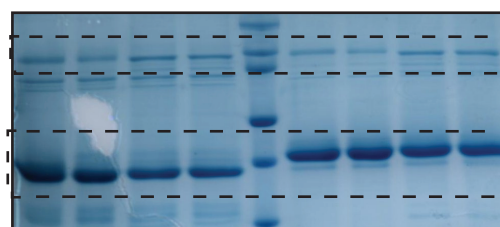

Coomassie

Supplement: fig3-figsupp1-data2 [file elife-98009-fig3-figsupp1-data2-v1.zip]

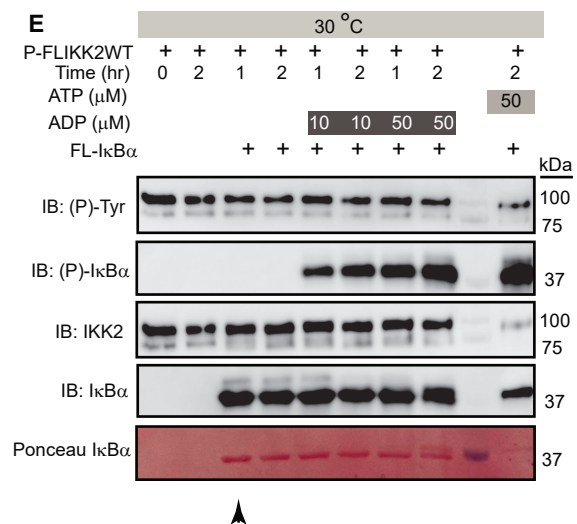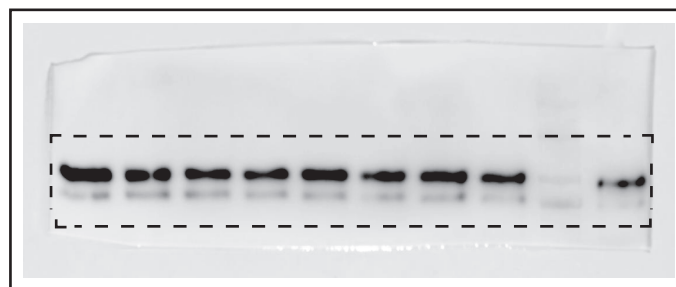

IB: (P)-Tyr

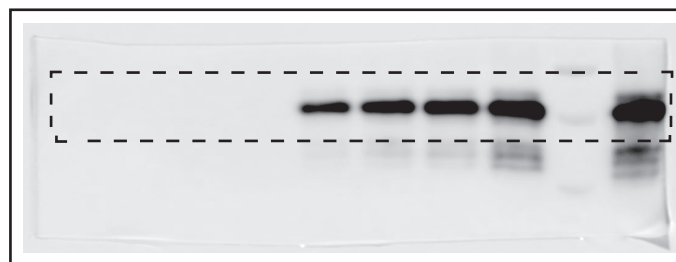

IB: (P)-IκBα

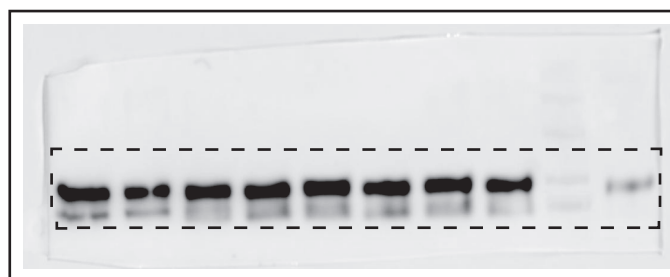

IB: IKK2

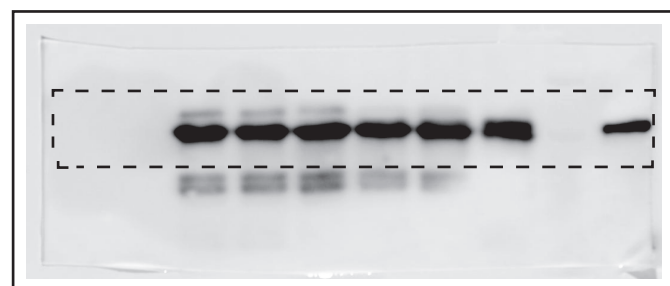

IB: IκBα

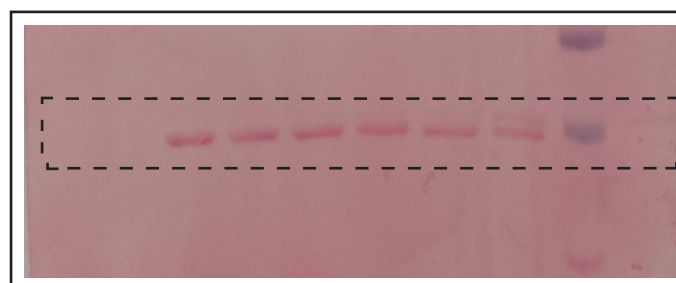

Ponceau IκBα

Supplement: fig5-data2 [file elife-98009-fig5-data2-v1.zip]

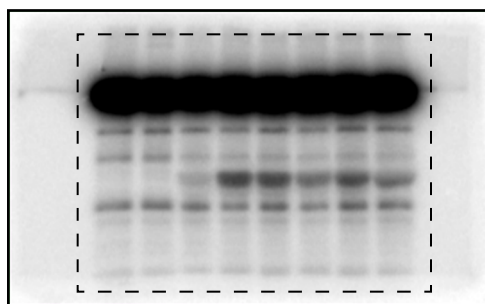

Autoradiograph

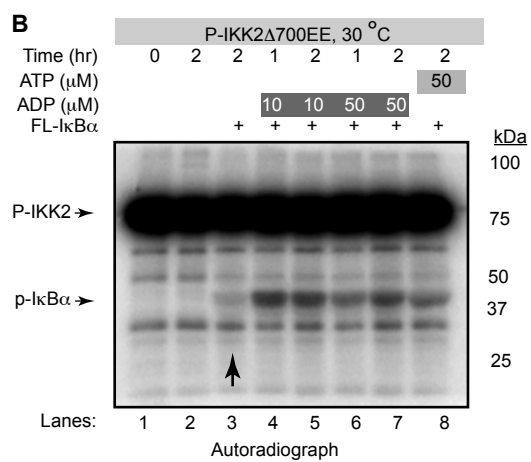

Supplement: fig5-data2 [file elife-98009-fig5-data2-v1.zip]

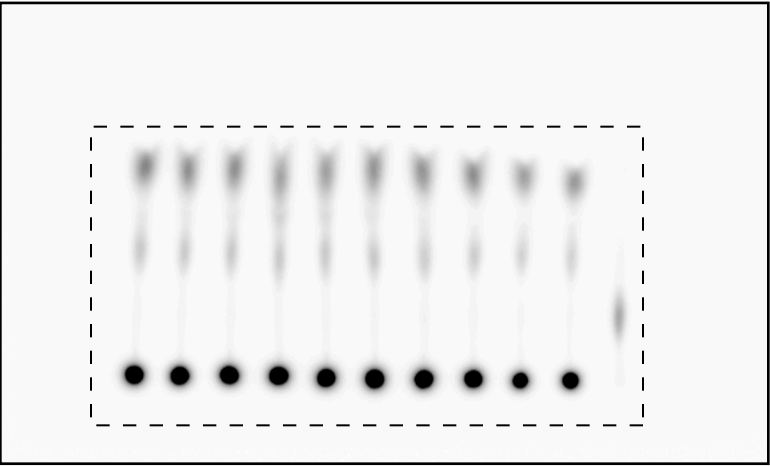

**D**

|                          | 30C |   | RT |    | 30C |    | RT |   | RT |    |
|--------------------------|-----|---|----|----|-----|----|----|---|----|----|
| Time (mins):             | 30  | 5 | 15 | 30 | 5   | 15 | 30 | 0 | 30 | 30 |
| ADP (μM):                | 20  |   | 20 | 20 | 50  | 50 | 50 | 0 | 20 | 20 |
| P <sup>32</sup> -Δ700EE: | +   | + | +  | +  | +   | +  | +  | + | +  | +  |

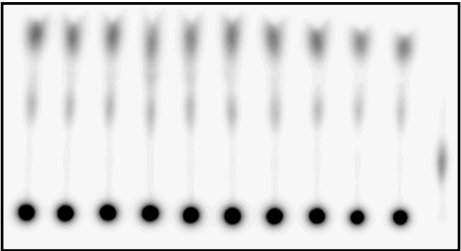

←ATP

PEI Cellulose TLC: Mobile Phase 0.5M K-Phosphate pH 3.5

Supplement: fig5-figsupp1-data2 [file elife-98009-fig5-figsupp1-data2-v1.zip]

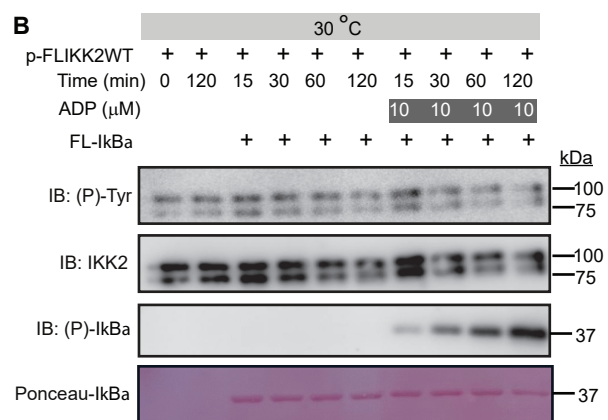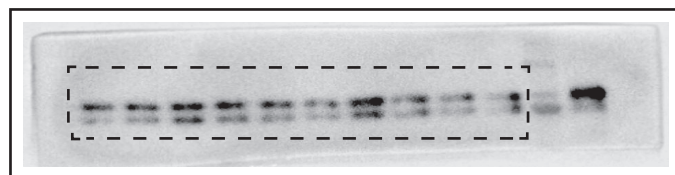

IB: (P)-Tyr

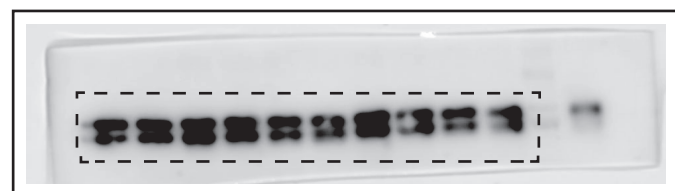

IB: IKK2

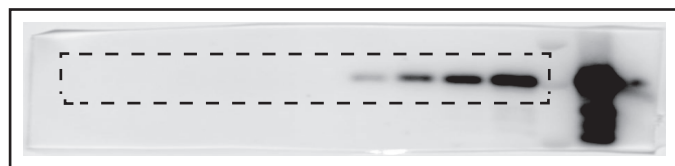

IB: (P)-IκBα

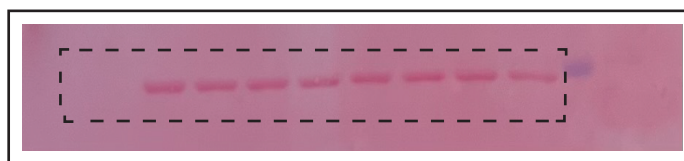

Ponceau-IκBα

Supplement: fig5-figsupp1-data2 [file elife-98009-fig5-figsupp1-data2-v1.zip]

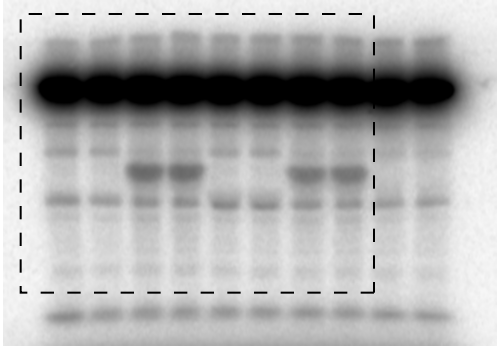

Autoradiograph

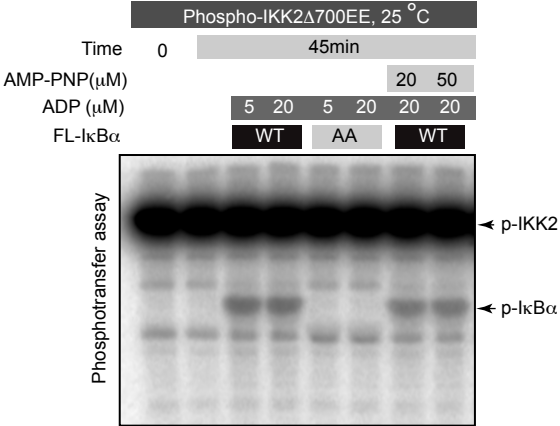

Autoradiograph

Supplement: fig6-data2 [file elife-98009-fig6-data2-v1.zip]

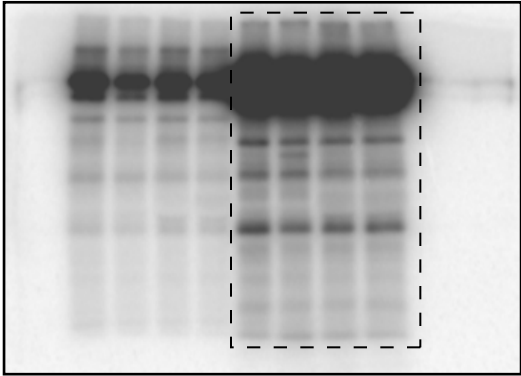

Autoradiograph

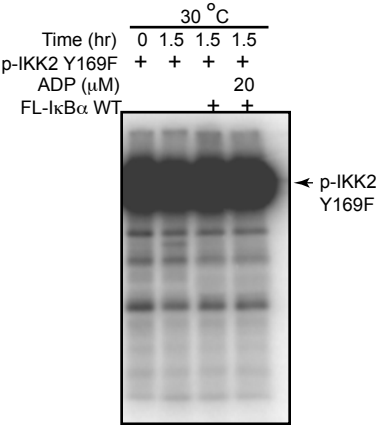

Autoradiograph

Supplement: fig6-figsupp1-data2 [file elife-98009-fig6-figsupp1-data2-v1.zip]
